# Supplementary material
Source: publisher figshare collection journal article supplement (https://acs.figshare.com/ndownloader/files/3921946)
Supplement: Supplementary file 1 [file 3921946]

#------------------ section 1. global information ---------------------------#
data_global

# publcif _publ_body_element loop start
loop_
_publ_body_element
_publ_body_title
_publ_body_contents

 section 
;
Introduction
; 
;

;
 section 
;
Experimental
; 
;

;
 subsection 
;
Synthesis and crystallization
; 
;

;
 subsection 
;
Refinement
;
;
Crystal data, data collection and structure refinement details are summarized
in Table 1.
;

 section 
;
Results and discussion
; 
;

;
# publcif _publ_body_element loop end


#------------------ audit details-------------------------------------------#
_audit_creation_date            date
_audit_creation_method          'wingx routine cif_update'
_audit_conform_dict_name        cif_core.dic
_audit_conform_dict_version     2.2
_audit_conform_dict_location    ftp://ftp.iucr.org/pub/cif_core.dic
_audit_update_record            
;
?

2012-07-20 # Formatted by publCIF
;


#------------------ submission details --------------------------------------#
# name and address of author for correspondence
_publ_contact_author_name      'Cattey,H\'el\`ene'
_publ_contact_author_address
;
ICMUB UMR 6302
Universit\'e de Bourgogne
Facult\'e des Sciences
9 Avenue Alain Savary
21000 DIJON
France
;
_publ_contact_author_email       'hcattey@u-bourgogne.fr'
_publ_contact_author_fax         '+33-0380393835'
_publ_contact_author_phone       '+33-0380393665'
_publ_requested_journal          'Journal of Organonic Chemistry'
#------------------ title and author list------------------------------------#
_publ_section_title
;
Selective Preparation of Diamondoid Phosphonates
;

_publ_section_title_footnote
.
loop_
_publ_author_name
_publ_author_address


'Fokin, Andrey A.'
;
Department of Organic Chemistry
Kiev Polytechnic Institute
pr. Pobedy 37
03056 Kiev
Ukraine
;
'Yurchenko, Raisa I.'
;
Institute of Organic Chemistry
Justus-Liebig University
Heinrich-Buff-Ring 58
35392 Giessen
Germany
;
'Tkachenko, Boryslav A.'
;
Institute of Organic Chemistry
Justus-Liebig University
Heinrich-Buff-Ring 58
35392 Giessen
Germany
;
'Fokina, Natalie A.'
;
Institute of Organic Chemistry
Justus-Liebig University
Heinrich-Buff-Ring 58
35392 Giessen
Germany
;
'Gunawan, Maria A.'
;
ICMUB UMR 6302
Universit\'e de Bourgogne
Facult\'e des Sciences
9 avenue Alain Savary
21000 DIJON
France
;
'Cattey, H\'el\`ene'
;
ICMUB UMR 6302
Universit\'e de Bourgogne
Facult\'e des Sciences
9 avenue Alain Savary
21000 DIJON
France
;
'Dahl, Jeremy E.P.'
;
Stanford University
Stanford Institute for Materials & Energy Science
476 Lomita Mall
Stanford
CA 94305
USA
;
'Carlson, Robert M.K.'
;
Stanford University
Stanford Institute for Materials & Energy Science
476 Lomita Mall
Stanford
CA 94305
USA
;
'Serefin, Michael'
;
Institut f\"ur Anorganische Chemie der Justus-Liebig-Universit\"at
Heinrich-Buff-Ring 58
D-35392 Giessen
Germany
;
'Hierso, Jean-Cyrille'
;
ICMUB UMR 6302
Universit\'e de Bourgogne
Facult\'e des Sciences
9 avenue Alain Savary
21000 DIJON
France
;
'Schreiner, Peter R.'
;
Institute of Organic Chemistry
Justus-Liebig University
Heinrich-Buff-Ring 58
35392 Giessen
Germany
;

#------------------ text ----------------------------------------------------#
data_mo_1401jc79_0m


_symmetry_space_group_name_hall   'P 2yb'
#Added by publCIF


_audit_creation_date              2014-01-17
_audit_creation_method
;
Olex2 1.2
(compiled 2013.12.10 svn.r2850 for OlexSys, GUI svn.r4736)
;
_shelxl_version_number            2013-3
_publ_contact_author_address
?
_publ_contact_author_email        hcattey@u-bourgogne.fr
_publ_contact_author_name         'CATTEY, H.'
_publ_contact_author_phone        ?
_publ_section_references
;
Bourhis, L. J., Dolomanov, O. V., Gildea, R. J., Howard, J. A. K. & Puschmann,
H. (2013). in preparation

Dolomanov, O. V., Bourhis, L. J., Gildea, R. J., Howard, J. A. K. & Puschmann,
H. (2009). J. Appl. Cryst. 42, 339-341.

Sheldrick, G. M. (2008). Acta Cryst. A64, 112-122
;
_chemical_name_common             ?
_chemical_name_systematic
?
_chemical_formula_moiety          'C14 H19 Cl2 O P'
_chemical_formula_sum             'C14 H19 Cl2 O P'
_chemical_formula_weight          305.16
_chemical_absolute_configuration  syn
_chemical_melting_point           ?
loop_
  _atom_type_symbol
  _atom_type_description
  _atom_type_scat_dispersion_real
  _atom_type_scat_dispersion_imag
  _atom_type_scat_source
 'C' 'C' 0.0033 0.0016 'International Tables Vol C Tables 4.2.6.8 and 6.1.1.4'
 'H' 'H' 0.0000 0.0000 'International Tables Vol C Tables 4.2.6.8 and 6.1.1.4'
 'Cl' 'Cl' 0.1484 0.1585 'International Tables Vol C Tables 4.2.6.8 and 6.1.1.4'
 'O' 'O' 0.0106 0.0060 'International Tables Vol C Tables 4.2.6.8 and 6.1.1.4'
 'P' 'P' 0.1023 0.0942 'International Tables Vol C Tables 4.2.6.8 and 6.1.1.4'

_shelx_space_group_comment
;
The symmetry employed for this shelxl refinement is uniquely defined
by the following loop, which should always be used as a source of
symmetry information in preference to the above space-group names.
They are only intended as comments.
;
_space_group_crystal_system       monoclinic
_space_group_IT_number            4
_space_group_name_H-M_alt         'P 1 21 1'
_space_group_name_Hall            'P 2yb'
loop_
  _space_group_symop_operation_xyz
 'x, y, z'
 '-x, y+1/2, -z'

_cell_length_a                    6.547(3)
_cell_length_b                    14.435(7)
_cell_length_c                    7.735(4)
_cell_angle_alpha                 90
_cell_angle_beta                  108.659(18)
_cell_angle_gamma                 90
_cell_volume                      692.5(6)
_cell_formula_units_Z             2
_cell_measurement_reflns_used     6274
_cell_measurement_temperature     100
_cell_measurement_theta_max       27.42
_cell_measurement_theta_min       2.78
_shelx_estimated_absorpt_T_max    ?
_shelx_estimated_absorpt_T_min    ?
_exptl_absorpt_coefficient_mu     0.569
_exptl_absorpt_correction_T_max   1.0000
_exptl_absorpt_correction_T_min   0.8055
_exptl_absorpt_correction_type    multi-scan
_exptl_absorpt_process_details
;
SADABS-2012/1 (Bruker,2012) was used for absorption correction.
wR2(int) was 0.1273 before and 0.0680 after correction.
The Ratio of minimum to maximum transmission is 0.8055.
The \l/2 correction factor is 0.0015.
;
_exptl_crystal_colour             'clear light colourless'
_exptl_crystal_colour_lustre      clear
_exptl_crystal_colour_modifier    light
_exptl_crystal_colour_primary     colourless
_exptl_crystal_density_diffrn     1.463
_exptl_crystal_density_meas       ?
_exptl_crystal_density_method     ?
_exptl_crystal_description        prism
_exptl_crystal_F_000              320
_exptl_crystal_preparation        ?
_exptl_crystal_size_max           0.58
_exptl_crystal_size_mid           0.22
_exptl_crystal_size_min           0.08
_exptl_special_details
?
_exptl_transmission_factor_max    ?
_exptl_transmission_factor_min    ?
_diffrn_reflns_av_R_equivalents   0.0451
_diffrn_reflns_av_unetI/netI      0.0407
_diffrn_reflns_Laue_measured_fraction_full 0.996
_diffrn_reflns_Laue_measured_fraction_max 0.991
_diffrn_reflns_limit_h_max        8
_diffrn_reflns_limit_h_min        -8
_diffrn_reflns_limit_k_max        18
_diffrn_reflns_limit_k_min        -18
_diffrn_reflns_limit_l_max        10
_diffrn_reflns_limit_l_min        -9
_diffrn_reflns_number             11813
_diffrn_reflns_point_group_measured_fraction_full 0.997
_diffrn_reflns_point_group_measured_fraction_max 0.992
_diffrn_reflns_theta_full         26.000
_diffrn_reflns_theta_max          27.487
_diffrn_reflns_theta_min          2.779
_diffrn_ambient_temperature       100
_diffrn_detector_area_resol_mean  ?
_diffrn_measured_fraction_theta_full 0.996
_diffrn_measured_fraction_theta_max 0.991
_diffrn_measurement_device_type   'Bruker APEX-II CCD'
_diffrn_measurement_method        '\f and \w scans'
_diffrn_radiation_type            MoK\a
_diffrn_radiation_wavelength      0.71073
_diffrn_source                    ?
_diffrn_standards_number          0
_reflns_Friedel_coverage          0.926
_reflns_Friedel_fraction_full     0.998
_reflns_Friedel_fraction_max      0.994
_reflns_number_gt                 2825
_reflns_number_total              3153
_reflns_special_details
;
 Reflections were merged by SHELXL according to the crystal
 class for the calculation of statistics and refinement.

 _reflns_Friedel_fraction is defined as the number of unique
 Friedel pairs measured divided by the number that would be
 possible theoretically, ignoring centric projections and
 systematic absences.
;
_reflns_threshold_expression      'I > 2\s(I)'
_computing_cell_refinement        'DENZO-SMN (Otwinowski & Minor, 1997)'
_computing_data_collection        'KappaCCD Server Software (Nonius,1998)'
_computing_data_reduction         'DENZO-SMN (Otwinowski & Minor, 1997)'
_computing_molecular_graphics     'ORTEP-3 (Farrugia, 1997)'
_computing_publication_material   'Olex2 (Dolomanov et al., 2009)'
_computing_structure_refinement   'XL (Sheldrick, 2008)'
_computing_structure_solution     'olex2.solve (Bourhis et al., 2013)'
_refine_diff_density_max          0.485
_refine_diff_density_min          -0.359
_refine_diff_density_rms          0.057
_refine_ls_abs_structure_details
;
 Refined as an inversion twin.
;
_refine_ls_abs_structure_Flack    0.10(11)
_refine_ls_extinction_coef        .
_refine_ls_extinction_method      none
_refine_ls_goodness_of_fit_ref    1.092
_refine_ls_hydrogen_treatment     constr
_refine_ls_matrix_type            full
_refine_ls_number_parameters      164
_refine_ls_number_reflns          3153
_refine_ls_number_restraints      1
_refine_ls_R_factor_all           0.0457
_refine_ls_R_factor_gt            0.0370
_refine_ls_restrained_S_all       1.091
_refine_ls_shift/su_max           0.000
_refine_ls_shift/su_mean          0.000
_refine_ls_structure_factor_coef  Fsqd
_refine_ls_weighting_details
'w=1/[\s^2^(Fo^2^)+(0.0369P)^2^+0.2200P] where P=(Fo^2^+2Fc^2^)/3'
_refine_ls_weighting_scheme       calc
_refine_ls_wR_factor_gt           0.0831
_refine_ls_wR_factor_ref          0.0889
_refine_special_details
;
 Refined as a 2-component inversion twin.
;
_olex2_refinement_description
;
1. Fixed Uiso
 At 1.2 times of:
  All C(H) groups, All C(H,H) groups
2.a Ternary CH refined with riding coordinates:
 C4(H4), C7(H7), C10(H10), C13(H13), C14(H14), C16(H16), C18(H18)
2.b Secondary CH2 refined with riding coordinates:
 C5(H5A,H5B), C8(H8A,H8B), C9(H9A,H9B), C12(H12A,H12B), C15(H15A,H15B),
 C17(H17A,H17B)
;
_atom_sites_solution_hydrogens    geom
_atom_sites_solution_primary      iterative
_atom_sites_solution_secondary    ?
loop_
  _atom_site_label
  _atom_site_type_symbol
  _atom_site_fract_x
  _atom_site_fract_y
  _atom_site_fract_z
  _atom_site_U_iso_or_equiv
  _atom_site_adp_type
  _atom_site_occupancy
  _atom_site_site_symmetry_order
  _atom_site_calc_flag
  _atom_site_refinement_flags_posn
  _atom_site_refinement_flags_adp
  _atom_site_refinement_flags_occupancy
  _atom_site_disorder_assembly
  _atom_site_disorder_group
 C4 C 0.0515(5) 0.2554(2) 0.5873(5) 0.0263(7) Uani 1 1 d . . . . .
 H4 H -0.0262 0.2280 0.6673 0.032 Uiso 1 1 calc R . . . .
 C5 C 0.0859(7) 0.4098(3) 0.7528(5) 0.0378(9) Uani 1 1 d . . . . .
 H5A H 0.0129 0.3832 0.8355 0.045 Uiso 1 1 calc R . . . .
 H5B H 0.0506 0.4766 0.7372 0.045 Uiso 1 1 calc R . . . .
 C7 C 0.4131(5) 0.2817(2) 0.5440(4) 0.0259(7) Uani 1 1 d . . . . .
 H7 H 0.5722 0.2718 0.5962 0.031 Uiso 1 1 calc R . . . .
 C8 C 0.3793(6) 0.2933(2) 0.8637(4) 0.0315(8) Uani 1 1 d . . . . .
 H8A H 0.3063 0.2676 0.9472 0.038 Uiso 1 1 calc R . . . .
 H8B H 0.5365 0.2840 0.9204 0.038 Uiso 1 1 calc R . . . .
 C9 C 0.0397(7) 0.3562(3) 0.2500(5) 0.0441(10) Uani 1 1 d . . . . .
 H9A H -0.1172 0.3668 0.1948 0.053 Uiso 1 1 calc R . . . .
 H9B H 0.1136 0.3836 0.1687 0.053 Uiso 1 1 calc R . . . .
 C10 C 0.3655(6) 0.3873(2) 0.5249(5) 0.0318(8) Uani 1 1 d . . . . .
 H10 H 0.4400 0.4144 0.4421 0.038 Uiso 1 1 calc R . . . .
 C11 C 0.3005(5) 0.2415(2) 0.6784(4) 0.0216(6) Uani 1 1 d . . . . .
 C12 C -0.0318(6) 0.2102(3) 0.3958(5) 0.0382(9) Uani 1 1 d . . . . .
 H12A H -0.0063 0.1426 0.4065 0.046 Uiso 1 1 calc R . . . .
 H12B H -0.1889 0.2208 0.3421 0.046 Uiso 1 1 calc R . . . .
 C13 C 0.0069(6) 0.3610(2) 0.5675(5) 0.0289(7) Uani 1 1 d . . . . .
 H13 H -0.1519 0.3712 0.5128 0.035 Uiso 1 1 calc R . . . .
 C14 C 0.0858(7) 0.2522(3) 0.2709(5) 0.0419(10) Uani 1 1 d . . . . .
 H14 H 0.0327 0.2220 0.1483 0.050 Uiso 1 1 calc R . . . .
 C15 C 0.3296(6) 0.2363(3) 0.3541(5) 0.0371(8) Uani 1 1 d . . . . .
 H15A H 0.4048 0.2634 0.2735 0.044 Uiso 1 1 calc R . . . .
 H15B H 0.3602 0.1690 0.3648 0.044 Uiso 1 1 calc R . . . .
 C16 C 0.1210(6) 0.4020(3) 0.4385(5) 0.0325(8) Uani 1 1 d . . . . .
 H16 H 0.0907 0.4700 0.4247 0.039 Uiso 1 1 calc R . . . .
 C17 C 0.4469(7) 0.4366(3) 0.7097(6) 0.0401(9) Uani 1 1 d . . . . .
 H17A H 0.6043 0.4273 0.7644 0.048 Uiso 1 1 calc R . . . .
 H17B H 0.4188 0.5040 0.6930 0.048 Uiso 1 1 calc R . . . .
 C18 C 0.3305(7) 0.3972(3) 0.8359(5) 0.0366(9) Uani 1 1 d . . . . .
 H18 H 0.3823 0.4295 0.9564 0.044 Uiso 1 1 calc R . . . .
 O6 O 0.3002(5) 0.05130(19) 0.5726(5) 0.0490(8) Uani 1 1 d . . . . .
 P1 P 0.36417(13) 0.11805(6) 0.72171(13) 0.0299(2) Uani 1 1 d . . . . .
 Cl2 Cl 0.24402(17) 0.08174(7) 0.92405(15) 0.0458(3) Uani 1 1 d . . . . .
 Cl3 Cl 0.68710(15) 0.11213(8) 0.85026(17) 0.0559(3) Uani 1 1 d . . . . .

loop_
  _atom_site_aniso_label
  _atom_site_aniso_U_11
  _atom_site_aniso_U_22
  _atom_site_aniso_U_33
  _atom_site_aniso_U_23
  _atom_site_aniso_U_13
  _atom_site_aniso_U_12
 C4 0.0222(16) 0.0244(16) 0.0341(17) -0.0001(13) 0.0117(13) -0.0017(13)
 C5 0.055(3) 0.0285(18) 0.0371(19) -0.0006(15) 0.0247(19) 0.0104(18)
 C7 0.0200(16) 0.0317(17) 0.0274(15) -0.0001(13) 0.0094(12) -0.0019(13)
 C8 0.040(2) 0.0295(18) 0.0221(15) -0.0029(13) 0.0064(14) 0.0000(16)
 C9 0.043(2) 0.060(3) 0.0265(19) 0.0095(18) 0.0066(16) 0.009(2)
 C10 0.0356(19) 0.0295(18) 0.0343(18) 0.0062(15) 0.0167(15) -0.0040(15)
 C11 0.0233(16) 0.0178(14) 0.0240(15) -0.0018(12) 0.0082(12) -0.0005(12)
 C12 0.0241(18) 0.037(2) 0.045(2) -0.0117(16) -0.0001(15) -0.0060(16)
 C13 0.0282(18) 0.0263(17) 0.0344(17) 0.0047(14) 0.0129(14) 0.0079(14)
 C14 0.041(2) 0.055(3) 0.0235(17) -0.0104(16) 0.0028(15) 0.0013(19)
 C15 0.041(2) 0.047(2) 0.0273(17) -0.0057(16) 0.0172(15) 0.0048(18)
 C16 0.039(2) 0.0297(17) 0.0309(17) 0.0087(14) 0.0135(15) 0.0033(16)
 C17 0.044(2) 0.0245(18) 0.048(2) -0.0023(16) 0.0096(18) -0.0079(16)
 C18 0.053(2) 0.0276(18) 0.0279(17) -0.0078(14) 0.0109(16) 0.0009(17)
 O6 0.0569(19) 0.0281(14) 0.0638(19) -0.0124(13) 0.0217(15) 0.0017(13)
 P1 0.0254(4) 0.0211(4) 0.0438(5) 0.0012(4) 0.0118(3) 0.0022(4)
 Cl2 0.0483(5) 0.0376(5) 0.0567(6) 0.0189(4) 0.0243(4) 0.0042(4)
 Cl3 0.0246(4) 0.0471(6) 0.0897(8) 0.0161(6) 0.0093(4) 0.0075(5)

_geom_special_details
;
 All esds (except the esd in the dihedral angle between two l.s. planes)
 are estimated using the full covariance matrix.  The cell esds are taken
 into account individually in the estimation of esds in distances, angles
 and torsion angles; correlations between esds in cell parameters are only
 used when they are defined by crystal symmetry.  An approximate (isotropic)
 treatment of cell esds is used for estimating esds involving l.s. planes.
;
loop_
  _geom_bond_atom_site_label_1
  _geom_bond_atom_site_label_2
  _geom_bond_distance
  _geom_bond_site_symmetry_2
  _geom_bond_publ_flag
 C4 H4 1.0000 . ?
 C4 C11 1.569(4) . ?
 C4 C12 1.548(5) . ?
 C4 C13 1.551(5) . ?
 C5 H5A 0.9900 . ?
 C5 H5B 0.9900 . ?
 C5 C13 1.530(5) . ?
 C5 C18 1.534(6) . ?
 C7 H7 1.0000 . ?
 C7 C10 1.554(5) . ?
 C7 C11 1.565(4) . ?
 C7 C15 1.540(5) . ?
 C8 H8A 0.9900 . ?
 C8 H8B 0.9900 . ?
 C8 C11 1.551(4) . ?
 C8 C18 1.534(5) . ?
 C9 H9A 0.9900 . ?
 C9 H9B 0.9900 . ?
 C9 C14 1.529(6) . ?
 C9 C16 1.533(5) . ?
 C10 H10 1.0000 . ?
 C10 C16 1.539(5) . ?
 C10 C17 1.532(5) . ?
 C11 P1 1.836(3) . ?
 C12 H12A 0.9900 . ?
 C12 H12B 0.9900 . ?
 C12 C14 1.539(6) . ?
 C13 H13 1.0000 . ?
 C13 C16 1.543(5) . ?
 C14 H14 1.0000 . ?
 C14 C15 1.536(6) . ?
 C15 H15A 0.9900 . ?
 C15 H15B 0.9900 . ?
 C16 H16 1.0000 . ?
 C17 H17A 0.9900 . ?
 C17 H17B 0.9900 . ?
 C17 C18 1.527(6) . ?
 C18 H18 1.0000 . ?
 O6 P1 1.458(3) . ?
 P1 Cl2 2.0325(16) . ?
 P1 Cl3 2.0298(15) . ?

loop_
  _geom_angle_atom_site_label_1
  _geom_angle_atom_site_label_2
  _geom_angle_atom_site_label_3
  _geom_angle
  _geom_angle_site_symmetry_1
  _geom_angle_site_symmetry_3
  _geom_angle_publ_flag
 C11 C4 H4 109.4 . . ?
 C12 C4 H4 109.4 . . ?
 C12 C4 C11 111.9(3) . . ?
 C12 C4 C13 108.8(3) . . ?
 C13 C4 H4 109.4 . . ?
 C13 C4 C11 107.8(3) . . ?
 H5A C5 H5B 108.2 . . ?
 C13 C5 H5A 109.8 . . ?
 C13 C5 H5B 109.8 . . ?
 C13 C5 C18 109.4(3) . . ?
 C18 C5 H5A 109.8 . . ?
 C18 C5 H5B 109.8 . . ?
 C10 C7 H7 109.3 . . ?
 C10 C7 C11 107.7(3) . . ?
 C11 C7 H7 109.3 . . ?
 C15 C7 H7 109.3 . . ?
 C15 C7 C10 109.1(3) . . ?
 C15 C7 C11 112.2(3) . . ?
 H8A C8 H8B 108.1 . . ?
 C11 C8 H8A 109.6 . . ?
 C11 C8 H8B 109.6 . . ?
 C18 C8 H8A 109.6 . . ?
 C18 C8 H8B 109.6 . . ?
 C18 C8 C11 110.4(3) . . ?
 H9A C9 H9B 108.3 . . ?
 C14 C9 H9A 109.9 . . ?
 C14 C9 H9B 109.9 . . ?
 C14 C9 C16 109.0(3) . . ?
 C16 C9 H9A 109.9 . . ?
 C16 C9 H9B 109.9 . . ?
 C7 C10 H10 108.7 . . ?
 C16 C10 C7 109.0(3) . . ?
 C16 C10 H10 108.7 . . ?
 C17 C10 C7 111.6(3) . . ?
 C17 C10 H10 108.7 . . ?
 C17 C10 C16 110.1(3) . . ?
 C4 C11 P1 110.4(2) . . ?
 C7 C11 C4 107.2(2) . . ?
 C7 C11 P1 110.7(2) . . ?
 C8 C11 C4 110.1(3) . . ?
 C8 C11 C7 110.3(3) . . ?
 C8 C11 P1 108.1(2) . . ?
 C4 C12 H12A 109.7 . . ?
 C4 C12 H12B 109.7 . . ?
 H12A C12 H12B 108.2 . . ?
 C14 C12 C4 109.9(3) . . ?
 C14 C12 H12A 109.7 . . ?
 C14 C12 H12B 109.7 . . ?
 C4 C13 H13 108.9 . . ?
 C5 C13 C4 111.3(3) . . ?
 C5 C13 H13 108.9 . . ?
 C5 C13 C16 109.9(3) . . ?
 C16 C13 C4 109.0(3) . . ?
 C16 C13 H13 108.9 . . ?
 C9 C14 C12 109.4(3) . . ?
 C9 C14 H14 109.4 . . ?
 C9 C14 C15 109.5(3) . . ?
 C12 C14 H14 109.4 . . ?
 C15 C14 C12 109.9(3) . . ?
 C15 C14 H14 109.4 . . ?
 C7 C15 H15A 109.7 . . ?
 C7 C15 H15B 109.7 . . ?
 C14 C15 C7 109.9(3) . . ?
 C14 C15 H15A 109.7 . . ?
 C14 C15 H15B 109.7 . . ?
 H15A C15 H15B 108.2 . . ?
 C9 C16 C10 110.5(3) . . ?
 C9 C16 C13 110.9(3) . . ?
 C9 C16 H16 109.0 . . ?
 C10 C16 C13 108.5(3) . . ?
 C10 C16 H16 109.0 . . ?
 C13 C16 H16 109.0 . . ?
 C10 C17 H17A 109.9 . . ?
 C10 C17 H17B 109.9 . . ?
 H17A C17 H17B 108.3 . . ?
 C18 C17 C10 109.1(3) . . ?
 C18 C17 H17A 109.9 . . ?
 C18 C17 H17B 109.9 . . ?
 C5 C18 H18 109.4 . . ?
 C8 C18 C5 108.5(3) . . ?
 C8 C18 H18 109.4 . . ?
 C17 C18 C5 110.8(3) . . ?
 C17 C18 C8 109.3(3) . . ?
 C17 C18 H18 109.4 . . ?
 C11 P1 Cl2 105.64(11) . . ?
 C11 P1 Cl3 105.67(11) . . ?
 O6 P1 C11 120.41(17) . . ?
 O6 P1 Cl2 110.78(15) . . ?
 O6 P1 Cl3 110.51(14) . . ?
 Cl3 P1 Cl2 102.17(7) . . ?

loop_
  _geom_torsion_atom_site_label_1
  _geom_torsion_atom_site_label_2
  _geom_torsion_atom_site_label_3
  _geom_torsion_atom_site_label_4
  _geom_torsion
  _geom_torsion_site_symmetry_1
  _geom_torsion_site_symmetry_2
  _geom_torsion_site_symmetry_3
  _geom_torsion_site_symmetry_4
  _geom_torsion_publ_flag
 C4 C11 P1 O6 56.9(3) . . . . ?
 C4 C11 P1 Cl2 -69.4(2) . . . . ?
 C4 C11 P1 Cl3 -177.22(18) . . . . ?
 C4 C12 C14 C9 -61.2(4) . . . . ?
 C4 C12 C14 C15 59.1(4) . . . . ?
 C4 C13 C16 C9 59.4(4) . . . . ?
 C4 C13 C16 C10 -62.1(4) . . . . ?
 C5 C13 C16 C9 -178.4(3) . . . . ?
 C5 C13 C16 C10 60.1(4) . . . . ?
 C7 C10 C16 C9 -59.6(4) . . . . ?
 C7 C10 C16 C13 62.2(4) . . . . ?
 C7 C10 C17 C18 -61.3(4) . . . . ?
 C7 C11 P1 O6 -61.7(3) . . . . ?
 C7 C11 P1 Cl2 172.01(19) . . . . ?
 C7 C11 P1 Cl3 64.2(2) . . . . ?
 C8 C11 P1 O6 177.4(2) . . . . ?
 C8 C11 P1 Cl2 51.1(2) . . . . ?
 C8 C11 P1 Cl3 -56.7(2) . . . . ?
 C9 C14 C15 C7 60.8(4) . . . . ?
 C10 C7 C11 C4 63.5(3) . . . . ?
 C10 C7 C11 C8 -56.5(3) . . . . ?
 C10 C7 C11 P1 -176.0(2) . . . . ?
 C10 C7 C15 C14 -59.7(4) . . . . ?
 C10 C17 C18 C5 -58.8(4) . . . . ?
 C10 C17 C18 C8 60.7(4) . . . . ?
 C11 C4 C12 C14 -58.8(4) . . . . ?
 C11 C4 C13 C5 -58.4(4) . . . . ?
 C11 C4 C13 C16 63.0(3) . . . . ?
 C11 C7 C10 C16 -63.3(3) . . . . ?
 C11 C7 C10 C17 58.5(4) . . . . ?
 C11 C7 C15 C14 59.5(4) . . . . ?
 C11 C8 C18 C5 60.7(4) . . . . ?
 C11 C8 C18 C17 -60.2(4) . . . . ?
 C12 C4 C11 C7 56.2(3) . . . . ?
 C12 C4 C11 C8 176.2(3) . . . . ?
 C12 C4 C11 P1 -64.5(3) . . . . ?
 C12 C4 C13 C5 -180.0(3) . . . . ?
 C12 C4 C13 C16 -58.6(4) . . . . ?
 C12 C14 C15 C7 -59.4(4) . . . . ?
 C13 C4 C11 C7 -63.4(3) . . . . ?
 C13 C4 C11 C8 56.6(3) . . . . ?
 C13 C4 C11 P1 175.9(2) . . . . ?
 C13 C4 C12 C14 60.2(4) . . . . ?
 C13 C5 C18 C8 -61.2(4) . . . . ?
 C13 C5 C18 C17 58.8(4) . . . . ?
 C14 C9 C16 C10 60.4(4) . . . . ?
 C14 C9 C16 C13 -60.0(4) . . . . ?
 C15 C7 C10 C16 58.7(3) . . . . ?
 C15 C7 C10 C17 -179.5(3) . . . . ?
 C15 C7 C11 C4 -56.6(3) . . . . ?
 C15 C7 C11 C8 -176.5(3) . . . . ?
 C15 C7 C11 P1 63.9(3) . . . . ?
 C16 C9 C14 C12 60.1(4) . . . . ?
 C16 C9 C14 C15 -60.3(4) . . . . ?
 C16 C10 C17 C18 59.8(4) . . . . ?
 C17 C10 C16 C9 177.7(3) . . . . ?
 C17 C10 C16 C13 -60.5(4) . . . . ?
 C18 C5 C13 C4 61.6(4) . . . . ?
 C18 C5 C13 C16 -59.3(4) . . . . ?
 C18 C8 C11 C4 -59.4(4) . . . . ?
 C18 C8 C11 C7 58.8(4) . . . . ?
 C18 C8 C11 P1 179.9(3) . . . . ?

_shelx_res_file
;
TITL
CELL 0.71073 6.5465 14.4349 7.7352 90 108.6587 90
ZERR 2 0.003 0.0074 0.0044 0 0.0182 0
LATT -1
SYMM -X,0.5+Y,-Z

SFAC C H Cl O P
UNIT 28 38 4 2 2

L.S. 4
PLAN  20
TEMP -173.15
MORE -1
BOND $H
fmap 2
acta 52
CONF
TWIN -1 0 0 0 -1 0 0 0 -1 2
OMIT 2 0 0
REM <HKL>C:/Users/hcattey/Documents/My%20Dropbox/StructuresEnCours/1401jc79/14
REM 01jc79/mo_1401jc79_0m.hkl</HKL>

WGHT    0.036900    0.220000
BASF   0.09507
FVAR       0.37689
C4    1    0.051468    0.255363    0.587267    11.00000    0.02218    0.02442 =
         0.03408   -0.00014    0.01169   -0.00174
AFIX  13
H4    2   -0.026233    0.227972    0.667315    11.00000   -1.20000
AFIX   0
C5    1    0.085930    0.409779    0.752769    11.00000    0.05494    0.02848 =
         0.03705   -0.00058    0.02474    0.01038
AFIX  23
H5A   2    0.012913    0.383247    0.835473    11.00000   -1.20000
H5B   2    0.050611    0.476586    0.737228    11.00000   -1.20000
AFIX   0
C7    1    0.413072    0.281693    0.544010    11.00000    0.02000    0.03165 =
         0.02735   -0.00012    0.00936   -0.00193
AFIX  13
H7    2    0.572240    0.271784    0.596176    11.00000   -1.20000
AFIX   0
C8    1    0.379327    0.293302    0.863687    11.00000    0.04034    0.02953 =
         0.02212   -0.00286    0.00639   -0.00002
AFIX  23
H8A   2    0.306299    0.267645    0.947156    11.00000   -1.20000
H8B   2    0.536487    0.284006    0.920350    11.00000   -1.20000
AFIX   0
C9    1    0.039732    0.356171    0.250003    11.00000    0.04268    0.06006 =
         0.02652    0.00952    0.00661    0.00928
AFIX  23
H9A   2   -0.117153    0.366797    0.194785    11.00000   -1.20000
H9B   2    0.113553    0.383596    0.168712    11.00000   -1.20000
AFIX   0
C10   1    0.365510    0.387334    0.524880    11.00000    0.03557    0.02952 =
         0.03432    0.00619    0.01665   -0.00398
AFIX  13
H10   2    0.439986    0.414410    0.442119    11.00000   -1.20000
AFIX   0
C11   1    0.300546    0.241482    0.678419    11.00000    0.02332    0.01780 =
         0.02403   -0.00178    0.00818   -0.00049
C12   1   -0.031782    0.210243    0.395827    11.00000    0.02407    0.03746 =
         0.04508   -0.01173   -0.00008   -0.00596
AFIX  23
H12A  2   -0.006345    0.142566    0.406536    11.00000   -1.20000
H12B  2   -0.188865    0.220841    0.342139    11.00000   -1.20000
AFIX   0
C13   1    0.006891    0.361011    0.567537    11.00000    0.02818    0.02634 =
         0.03439    0.00465    0.01293    0.00790
AFIX  13
H13   2   -0.151927    0.371161    0.512832    11.00000   -1.20000
AFIX   0
C14   1    0.085776    0.252241    0.270938    11.00000    0.04138    0.05549 =
         0.02346   -0.01043    0.00275    0.00133
AFIX  13
H14   2    0.032701    0.221979    0.148341    11.00000   -1.20000
AFIX   0
C15   1    0.329635    0.236342    0.354135    11.00000    0.04099    0.04732 =
         0.02734   -0.00568    0.01717    0.00482
AFIX  23
H15A  2    0.404837    0.263402    0.273529    11.00000   -1.20000
H15B  2    0.360191    0.169039    0.364846    11.00000   -1.20000
AFIX   0
C16   1    0.121039    0.402031    0.438536    11.00000    0.03869    0.02972 =
         0.03086    0.00870    0.01354    0.00327
AFIX  13
H16   2    0.090702    0.470003    0.424686    11.00000   -1.20000
AFIX   0
C17   1    0.446877    0.436625    0.709656    11.00000    0.04402    0.02455 =
         0.04805   -0.00232    0.00956   -0.00792
AFIX  23
H17A  2    0.604292    0.427314    0.764389    11.00000   -1.20000
H17B  2    0.418768    0.503961    0.692951    11.00000   -1.20000
AFIX   0
C18   1    0.330540    0.397164    0.835859    11.00000    0.05269    0.02765 =
         0.02793   -0.00781    0.01085    0.00094
AFIX  13
H18   2    0.382308    0.429506    0.956400    11.00000   -1.20000
AFIX   0
O6    4    0.300202    0.051297    0.572603    11.00000    0.05689    0.02807 =
         0.06378   -0.01239    0.02172    0.00173
P1    5    0.364172    0.118051    0.721710    11.00000    0.02536    0.02114 =
         0.04375    0.00121    0.01177    0.00219
CL2   3    0.244020    0.081738    0.924053    11.00000    0.04834    0.03762 =
         0.05673    0.01893    0.02427    0.00420
CL3   3    0.687096    0.112128    0.850264    11.00000    0.02460    0.04707 =
         0.08966    0.01613    0.00927    0.00749
HKLF 4

REM
REM R1 =  0.0370 for    2825 Fo > 4sig(Fo)  and  0.0457 for all    3153 data
REM    164 parameters refined using      1 restraints

END

WGHT      0.0369      0.2200

REM Highest difference peak  0.485,  deepest hole -0.359,  1-sigma level  0.057
Q1    1   0.3361  0.1806  0.7087  11.00000  0.05    0.49
Q2    1   0.2275  0.1443  0.9128  11.00000  0.05    0.36
Q3    1   0.2564  0.0201  0.9335  11.00000  0.05    0.31
Q4    1   0.0569  0.3125  0.6049  11.00000  0.05    0.26
Q5    1   0.3545  0.0029  0.6169  11.00000  0.05    0.26
Q6    1   0.3803  0.0564  0.7314  11.00000  0.05    0.25
Q7    1   0.6563  0.0453  0.8166  11.00000  0.05    0.25
Q8    1   0.5204  0.1183  0.7795  11.00000  0.05    0.24
Q9    1   0.3789  0.3340  0.5272  11.00000  0.05    0.24
Q10   1   0.7118  0.0550  0.8694  11.00000  0.05    0.24
Q11   1   0.3612  0.0948  1.0012  11.00000  0.05    0.23
Q12   1   0.1806  0.2569  0.6287  11.00000  0.05    0.22
Q13   1   0.6946  0.1779  0.8615  11.00000  0.05    0.21
Q14   1   0.2265  0.4174  0.7687  11.00000  0.05    0.21
Q15   1  -0.0014  0.1165 -0.0036  11.00000  0.05    0.20
Q16   1   0.3505  0.3589  0.8408  11.00000  0.05    0.20
Q17   1   0.0842  0.0590  0.8375  11.00000  0.05    0.19
Q18   1   0.1831  0.3797  0.8158  11.00000  0.05    0.18
Q19   1   0.2085  0.2614  0.3157  11.00000  0.05    0.18
Q20   1   0.6604  0.1328  0.9276  11.00000  0.05    0.18
;
_shelx_res_checksum               20798
_shelx_hkl_file
;
  -1   0   0   18.45    0.97
   2   0   0   18.26    1.01
  -3   0   0  734.58   36.66
  -3   0   0  740.76   32.31
  -4   0   0   10.87    0.78
  -4   0   0   10.20    0.77
   5   0   0    4.82    0.56
  -5   0   0    5.70    0.63
  -5   0   0    4.61    0.73
  -6   0   0    3.30    0.55
   6   0   0    3.64    0.50
   6   0   0    3.60    0.47
  -6   0   0    2.96    0.50
   7   0   0    2.09    0.28
  -7   0   0    2.56    0.60
   7   0   0    2.33    0.41
  -7   0   0    2.90    0.54
  -1   1   0  704.64   30.75
  -1   1   0  697.33   34.81
   2  -1   0   82.83    3.65
   2  -1   0   84.07    4.14
  -2  -1   0   78.67    3.61
  -2  -1   0   85.19    4.08
  -2   1   0   79.92    3.66
  -2   1   0   81.86    4.14
   3  -1   0  212.99    9.22
  -3  -1   0  201.20    9.20
  -3  -1   0  214.98   10.41
  -3   1   0  199.51    9.23
   3   1   0  232.09    9.19
   3   1   0  199.48    9.17
  -3   1   0  210.92   10.46
   4  -1   0   25.14    1.23
  -4  -1   0   24.95    1.29
   4   1   0   26.65    1.13
  -4   1   0   22.92    1.41
   4   1   0   22.16    1.13
  -4   1   0   21.94    1.30
  -5  -1   0    0.83    0.27
   5  -1   0    0.46    0.36
   5  -1   0    0.90    0.34
   5  -1   0    0.68    0.54
  -5   1   0    0.21    0.45
  -5   1   0    0.49    0.43
   5   1   0    0.42    0.44
   5   1   0    0.64    0.21
   5   1   0    0.66    0.22
  -6  -1   0   30.87    1.61
   6  -1   0   29.61    1.53
   6   1   0   31.63    1.38
   6   1   0   31.53    1.38
  -6   1   0   28.42    1.66
  -6   1   0   31.01    1.74
  -7  -1   0   23.84    1.39
   7  -1   0   26.67    1.33
   7  -1   0   23.92    1.28
  -7   1   0   23.74    1.59
  -7   1   0   24.60    1.47
   8  -1   0    0.93    0.32
  -8   1   0    0.73    0.47
   0   2   0  112.98    4.98
   1  -2   0  207.96    8.97
   1  -2   0  208.06   10.17
  -1  -2   0  202.77    8.94
  -1   2   0  197.30    8.97
  -1   2   0  206.20   10.17
   2  -2   0  642.98   28.57
  -2  -2   0  653.84   28.45
   2  -2   0  679.70   32.30
  -2   2   0  647.22   32.43
  -2   2   0  639.77   28.58
  -3  -2   0  113.33    5.22
   3  -2   0  113.37    5.29
  -3  -2   0  124.12    5.88
   3  -2   0  127.60    6.01
  -3   2   0  116.79    5.31
  -3   2   0  118.86    6.00
   4  -2   0   10.22    0.78
  -4  -2   0   10.71    0.54
  -4  -2   0    9.27    0.61
  -4   2   0    9.08    0.86
  -4   2   0    9.49    0.89
   4   2   0    8.34    0.62
   5  -2   0   12.25    0.89
  -5  -2   0   12.54    0.61
  -5  -2   0   11.10    0.73
  -5   2   0   11.11    1.02
   5   2   0    9.67    0.72
  -5   2   0   10.82    1.02
   6  -2   0    4.55    0.70
  -6  -2   0    4.96    0.59
   6  -2   0    5.30    0.74
  -6   2   0    3.61    0.62
  -6   2   0    4.92    0.78
   0  -3   0   -1.21    0.30
   0  -3   0   -1.27    0.25
   0   3   0   -1.27    0.27
   0   3   0   -1.44    0.30
   1  -3   0  176.58    8.63
  -1  -3   0  166.46    8.57
   1  -3   0  178.70    7.61
  -1  -3   0  173.32    7.55
   1   3   0  179.51    7.55
  -1   3   0  168.26    8.62
  -1   3   0  166.64    7.61
   2  -3   0    5.61    0.61
  -2  -3   0    6.33    0.27
  -2  -3   0    4.97    0.28
   2  -3   0    5.81    0.66
  -2   3   0    5.63    0.67
  -2   3   0    5.48    0.59
   3  -3   0    0.31    0.42
   3  -3   0    0.16    0.35
  -3   3   0    0.21    0.38
  -3   3   0   -0.38    0.39
  -4  -3   0   36.65    1.71
   4  -3   0   39.66    1.91
  -4   3   0   38.73    2.17
  -4   3   0   37.61    1.95
  -5  -3   0    7.41    0.52
   5  -3   0    8.42    0.85
  -5   3   0    7.20    0.99
  -5   3   0    8.40    0.98
   6  -3   0   19.43    1.18
  -6  -3   0   18.03    0.89
   6  -3   0   15.37    1.13
  -6   3   0   17.85    1.29
  -6   3   0   16.29    1.29
  -7  -3   0   19.82    1.00
   7  -3   0   21.19    1.30
   7  -3   0   20.28    1.38
  -7   3   0   20.20    1.61
  -7   3   0   21.87    1.44
   0  -4   0  392.67   19.46
   0  -4   0  395.94   17.16
   0   4   0  398.47   17.15
   0   4   0  383.43   19.45
   1  -4   0   45.94    2.38
  -1  -4   0   43.22    2.28
   1  -4   0   47.20    2.11
  -1  -4   0   45.55    2.01
   1   4   0   41.40    2.28
  -1   4   0   44.25    2.10
  -1   4   0   43.67    2.37
   1   4   0   45.38    2.01
   2  -4   0  189.88    9.59
  -2  -4   0  188.60    8.35
   2  -4   0  195.64    8.46
  -2  -4   0  188.57    8.36
  -2   4   0  189.52    9.59
   2   4   0  197.88    9.47
  -2   4   0  190.71    8.47
   3  -4   0   87.82    4.50
   3  -4   0   89.60    3.97
  -3   4   0   84.77    3.99
  -3   4   0   86.71    4.51
   4  -4   0   18.69    1.20
  -4   4   0   18.34    1.24
  -4   4   0   17.99    1.36
   5  -4   0    0.89    0.60
   5  -4   0    0.75    0.48
  -5   4   0    1.40    0.57
  -5   4   0    1.33    0.61
   6  -4   0   17.42    1.16
   6  -4   0   15.00    1.19
  -6   4   0   13.92    1.32
  -6   4   0   16.59    1.30
   7  -4   0    2.56    0.54
   7  -4   0    2.38    0.67
  -7   4   0    1.99    0.85
  -7   4   0    3.17    0.62
   0  -5   0    0.07    0.37
   0  -5   0    0.23    0.31
   0   5   0   -0.25    0.36
   0   5   0   -0.08    0.31
  -1  -5   0  251.98   12.53
   1  -5   0  254.64   12.59
  -1  -5   0  257.25   11.05
   1  -5   0  260.26   11.10
  -1   5   0  259.29   11.10
  -1   5   0  242.72   12.58
   1   5   0  239.95   12.52
   1   5   0  253.55   11.04
   2  -5   0    3.43    0.55
   2  -5   0    3.77    0.67
  -2  -5   0    2.60    0.39
  -2  -5   0    3.39    0.32
   2   5   0    3.94    0.24
  -2   5   0    3.20    0.49
  -2   5   0    2.73    0.53
   3  -5   0   16.39    1.09
   3  -5   0   16.50    1.22
  -3   5   0   15.95    1.21
  -3   5   0   14.72    1.11
   4  -5   0   48.95    2.44
  -4   5   0   49.60    2.79
  -4   5   0   49.65    2.50
   5  -5   0   21.88    1.37
  -5   5   0   20.80    1.55
  -5   5   0   20.58    1.42
   6  -5   0   59.13    2.96
   6  -5   0   57.73    2.93
  -6   5   0   58.36    3.04
  -6   5   0   64.63    3.34
   7  -5   0   17.97    1.52
   7  -5   0   19.90    1.34
  -7   5   0   18.96    1.77
  -7   5   0   20.14    1.51
   0  -6   0 1000.00   48.23
   0  -6   0  959.45   42.48
   0   6   0  960.84   48.22
   0   6   0  960.72   42.51
  -1  -6   0  265.26   11.70
   1  -6   0  268.68   13.32
   1  -6   0  263.48   11.75
  -1  -6   0  259.12   13.27
  -1   6   0  279.11   13.33
   1   6   0  274.68   11.69
  -1   6   0  260.86   11.75
   1   6   0  264.95   13.26
   2  -6   0   93.14    4.81
   2  -6   0   95.40    4.26
  -2  -6   0   92.80    4.12
  -2   6   0   91.06    4.81
  -2   6   0   87.74    4.24
   2   6   0   98.82    4.10
   3  -6   0   36.71    2.15
   3  -6   0   36.01    1.88
  -3  -6   0   39.71    1.60
  -3  -6   0   36.82    1.61
  -3   6   0   32.78    1.90
  -3   6   0   33.01    2.13
   4  -6   0   38.72    2.02
  -4   6   0   38.09    2.32
  -4   6   0   36.49    2.07
   5  -6   0   16.10    1.23
  -5   6   0   16.60    1.37
  -5   6   0   14.99    1.26
   6  -6   0    1.34    0.66
  -6   6   0    0.84    0.74
  -6   6   0    2.80    0.72
   7  -6   0    2.64    0.83
  -7   6   0    2.45    0.95
   0  -7   0    0.52    0.45
   0  -7   0    0.26    0.35
   0   7   0    0.51    0.38
   0   7   0   -0.06    0.44
  -1  -7   0   77.38    4.07
  -1  -7   0   78.32    3.59
   1  -7   0   75.58    3.65
   1  -7   0   79.40    4.14
   1   7   0   79.37    4.07
   1   7   0   85.28    3.59
  -1   7   0   80.15    3.66
  -1   7   0   80.85    4.15
   2  -7   0    4.47    0.88
  -2  -7   0    3.71    0.55
   2  -7   0    4.44    0.73
  -2  -7   0    3.37    0.46
  -2   7   0    3.44    0.65
  -2   7   0    3.32    0.57
   2   7   0    4.22    0.41
   3  -7   0  148.12    6.96
   3  -7   0  156.15    7.91
  -3  -7   0  154.79    6.79
  -3  -7   0  157.65    6.78
  -3  -7   0  150.45    7.67
   3   7   0  161.33    7.68
  -3   7   0  157.91    7.92
  -3   7   0  153.16    6.99
   4  -7   0    8.99    1.06
   4  -7   0    6.11    1.11
  -4   7   0    8.17    1.22
  -4   7   0    7.98    1.10
   5  -7   0    9.20    1.07
  -5   7   0    9.26    1.19
  -5   7   0    7.61    1.11
   6  -7   0   24.92    1.77
  -6   7   0   22.37    1.79
  -6   7   0   31.07    1.91
   7  -7   0    4.75    0.95
  -7   7   0    5.89    1.14
   0  -8   0  169.63    7.87
   0  -8   0  175.44    8.94
   0   8   0  181.54    7.88
   0   8   0  183.31    8.95
   1  -8   0    9.63    1.00
  -1  -8   0    9.22    0.75
  -1  -8   0    9.29    0.86
   1  -8   0    8.68    0.85
  -1   8   0    9.09    0.91
   1   8   0   10.14    0.76
  -1   8   0   10.23    1.04
   1   8   0    9.58    0.86
  -2  -8   0   21.02    1.12
   2  -8   0   22.25    1.36
   2  -8   0   21.89    1.50
  -2   8   0   20.31    1.38
   2   8   0   21.42    1.26
  -2   8   0   20.64    1.54
   2   8   0   21.41    1.09
  -3  -8   0  129.66    5.79
   3  -8   0  130.78    5.99
  -3  -8   0  131.59    5.79
   3  -8   0  133.06    6.81
   3   8   0  137.07    6.56
  -3   8   0  122.96    5.98
  -3   8   0  135.27    6.80
   4  -8   0   61.58    3.05
  -4   8   0   62.84    3.46
  -4   8   0   59.52    3.05
   5  -8   0    4.79    0.78
  -5   8   0    7.09    1.16
  -5   8   0    3.98    0.76
   6  -8   0   20.29    1.68
  -6   8   0   25.04    1.76
  -6   8   0   17.33    1.70
   7  -8   0    0.81    0.98
  -7   8   0    2.52    1.19
  -7   8   0    2.74    0.75
   0  -9   0   -0.10    0.45
   0  -9   0   -0.09    0.51
   0   9   0   -0.37    0.53
   0   9   0   -0.42    0.43
  -1  -9   0   52.97    2.82
  -1  -9   0   54.01    2.48
   1  -9   0   54.85    2.57
   1  -9   0   52.57    2.90
  -1   9   0   47.70    2.53
   1   9   0   53.14    2.47
  -1   9   0   51.33    2.92
   1   9   0   49.59    2.81
  -2  -9   0    1.62    0.38
   2  -9   0    1.79    0.71
  -2  -9   0    0.95    0.48
   2  -9   0    1.36    0.59
   2   9   0    1.14    0.43
   2   9   0    1.25    0.35
  -2   9   0    1.19    0.74
  -2   9   0    0.83    0.60
  -3  -9   0   22.11    1.14
   3  -9   0   23.50    1.54
  -3  -9   0   23.21    1.15
   3  -9   0   22.70    1.68
  -3   9   0   20.87    1.49
  -3   9   0   21.00    1.67
   4  -9   0   36.44    1.99
  -4  -9   0   35.88    1.53
  -4  -9   0   33.57    1.53
  -4   9   0   31.28    1.94
  -4   9   0   34.91    2.24
   5  -9   0    3.16    0.76
  -5   9   0    3.86    0.88
  -5   9   0    2.85    0.77
   6  -9   0    5.78    0.96
  -6   9   0    6.16    1.00
   7  -9   0   13.08    1.27
  -7   9   0   12.36    1.38
   0 -10   0   30.60    1.88
   0 -10   0   30.56    1.68
   0  10   0   28.57    1.67
   0  10   0   29.61    1.90
  -1 -10   0   33.20    1.95
   1 -10   0   32.93    1.83
   1 -10   0   32.46    2.05
  -1 -10   0   31.28    1.71
   1  10   0   31.61    1.94
   1  10   0   34.15    1.71
  -1  10   0   32.08    2.08
  -1  10   0   30.55    1.82
   2 -10   0   12.96    1.23
  -2 -10   0   12.95    0.92
   2 -10   0   13.79    1.36
  -2  10   0   11.03    1.15
  -2  10   0   12.90    1.39
   2  10   0   13.17    1.04
   2  10   0   13.67    0.89
  -3 -10   0   24.61    1.25
   3 -10   0   24.59    1.57
   3 -10   0   21.19    1.83
  -3  10   0   23.19    1.86
   3  10   0   25.57    1.14
  -3  10   0   23.24    1.61
  -4 -10   0   35.41    1.55
  -4 -10   0   34.82    1.55
   4 -10   0   33.29    1.97
  -4  10   0   31.82    2.27
  -4  10   0   33.42    1.96
   5 -10   0    9.04    1.30
  -5  10   0    8.01    1.02
  -5  10   0   10.27    1.37
   6 -10   0   11.56    1.66
  -6  10   0   13.31    1.65
   0 -11   0   -0.11    0.62
   0 -11   0   -0.51    0.51
   0  11   0   -0.91    0.56
   0  11   0   -0.71    0.65
   1 -11   0   11.09    1.16
  -1 -11   0   12.03    1.15
  -1 -11   0   11.06    0.98
   1 -11   0   11.28    1.22
   1  11   0   10.01    1.13
   1  11   0   10.87    0.99
  -1  11   0    8.32    1.14
  -1  11   0    7.97    1.27
  -2 -11   0   17.81    1.12
   2 -11   0   17.94    1.37
   2 -11   0   18.48    1.59
  -2  11   0   17.53    1.42
   2  11   0   17.63    1.27
  -2  11   0   14.66    1.56
   2  11   0   17.70    1.09
  -3 -11   0   29.78    1.46
   3 -11   0   29.52    2.02
   3 -11   0   29.58    1.78
  -3  11   0   24.93    2.02
  -3  11   0   28.27    1.78
   3  11   0   29.36    1.36
  -4 -11   0   17.94    0.91
   4 -11   0   18.81    1.45
  -4 -11   0   18.80    0.92
   4  11   0   16.41    0.97
  -4  11   0   18.07    1.67
  -4  11   0   16.40    1.39
   5 -11   0   47.21    2.72
  -5  11   0   46.97    2.71
  -5  11   0   51.43    3.04
   6 -11   0   15.23    1.92
  -6  11   0   21.72    1.75
  -6  11   0   17.17    1.95
   0 -12   0    9.84    1.25
   0 -12   0    9.13    1.05
   0  12   0    8.80    1.11
   0  12   0   10.17    1.25
   1 -12   0   26.80    1.85
  -1 -12   0   26.04    1.54
   1 -12   0   27.07    1.67
  -1 -12   0   23.86    1.77
   1  12   0   27.20    1.77
  -1  12   0   25.51    1.63
   1  12   0   27.99    1.55
  -1  12   0   27.33    1.86
   2 -12   0    8.89    1.05
  -2 -12   0    9.04    0.84
   2 -12   0    8.82    1.27
   2  12   0    8.98    0.97
  -2  12   0    7.05    0.88
   2  12   0    8.57    0.81
  -2  12   0    9.08    1.21
  -3 -12   0   34.61    1.82
   3 -12   0   34.38    2.04
  -3 -12   0   37.39    1.80
  -3  12   0   37.16    2.12
   3  12   0   38.14    1.71
   3  12   0   36.41    2.05
  -3  12   0   35.26    2.41
  -4 -12   0   18.01    0.97
   4 -12   0   17.83    1.51
  -4 -12   0   18.04    0.98
  -4 -12   0   17.88    0.95
   4  12   0   16.88    1.02
  -4  12   0   15.86    1.43
  -4  12   0   18.41    1.65
   5 -12   0    5.92    1.05
  -5  12   0    8.06    1.25
  -5  12   0    5.71    0.97
  -6  12   0   10.26    1.85
  -6  12   0   14.52    1.61
   0 -13   0    0.02    0.51
   0 -13   0   -0.06    0.70
   0  13   0    0.02    0.69
   0  13   0   -1.13    0.52
   1 -13   0   12.83    1.19
   1 -13   0   12.63    1.36
  -1 -13   0   12.60    1.05
   1  13   0   12.64    1.06
  -1  13   0   12.96    1.23
   1  13   0   13.76    1.26
  -1  13   0   12.97    1.39
   2 -13   0   19.11    1.67
   2 -13   0   18.37    1.39
  -2 -13   0   18.86    1.21
  -2  13   0   18.25    1.42
   2  13   0   20.11    1.42
   2  13   0   19.96    1.19
  -2  13   0   19.17    1.61
  -3 -13   0   31.70    1.64
   3 -13   0   31.77    1.92
  -3 -13   0   31.01    1.68
   3  13   0   31.81    1.86
   3  13   0   32.59    1.54
  -3  13   0   27.65    1.94
  -3  13   0   32.45    2.27
  -4 -13   0    7.19    0.72
  -4 -13   0    8.97    0.76
  -4 -13   0    9.32    0.66
   4 -13   0    6.81    0.97
  -4  13   0    8.00    1.25
  -4  13   0   10.87    1.43
   4  13   0    8.39    0.73
   5 -13   0    1.39    0.82
   5 -13   0    2.35    0.98
  -5  13   0    2.47    0.89
   0 -14   0   15.69    1.26
   0  14   0   15.68    1.52
   0  14   0   16.25    1.30
  -1 -14   0    5.58    0.87
   1 -14   0    4.06    0.73
  -1  14   0    4.33    0.93
   1  14   0    4.50    0.82
  -1  14   0    3.30    0.75
   1  14   0    4.35    0.66
  -2 -14   0    9.86    1.10
  -2 -14   0    9.71    0.93
   2 -14   0    7.58    1.08
  -2  14   0    8.81    1.32
  -2  14   0    9.49    1.23
   2  14   0   10.54    1.17
   2  14   0    8.87    0.90
  -3 -14   0   23.43    1.49
  -3 -14   0   25.84    1.41
   3 -14   0   22.31    1.71
  -3  14   0   22.74    1.69
   3  14   0   24.26    1.63
  -3  14   0   25.20    2.02
   3  14   0   25.40    1.30
   4 -14   0   25.50    1.83
  -4 -14   0   24.80    1.38
  -4 -14   0   25.07    1.45
  -4 -14   0   26.32    1.43
  -4  14   0   25.99    1.82
  -4  14   0   28.33    2.07
   4  14   0   24.44    1.50
   5 -14   0   11.17    1.90
  -5  14   0   15.06    1.66
   0 -15   0    0.35    0.55
   0 -15   0   -0.45    0.82
   0  15   0    0.00    0.78
   0  15   0    0.41    0.65
   1 -15   0    1.58    0.67
   1 -15   0   -0.23    0.89
  -1 -15   0    0.94    0.88
  -1  15   0    1.45    0.68
  -1  15   0    3.25    0.94
   1  15   0    2.84    0.86
   1  15   0    1.77    0.58
  -2 -15   0    8.21    1.16
   2 -15   0    6.23    1.06
  -2 -15   0    6.49    0.88
  -2  15   0    6.47    0.92
  -2  15   0    7.98    1.42
   2  15   0    6.25    0.89
   2  15   0    6.70    1.19
   3 -15   0    9.78    1.33
  -3 -15   0   13.74    1.24
  -3 -15   0   11.02    1.04
   3  15   0   12.73    1.28
  -3  15   0   10.96    1.30
  -3  15   0   16.09    1.65
   3  15   0   12.99    0.93
  -4 -15   0    2.19    0.52
   4 -15   0    3.71    0.95
  -4 -15   0    3.55    0.60
   4  15   0    3.07    0.55
  -4  15   0    2.73    0.84
   0 -16   0   13.16    1.21
   0  16   0   12.42    1.26
   0  16   0   12.86    1.60
   1 -16   0    9.17    1.18
  -1 -16   0    8.92    1.01
   1  16   0    9.38    1.48
   1  16   0   10.79    1.09
  -1  16   0   10.16    1.53
  -1  16   0    8.20    1.24
  -2 -16   0   -0.65    0.95
  -2 -16   0    1.86    0.79
   2 -16   0    0.44    0.61
  -2 -16   0   -0.12    0.47
   2 -16   0    0.00    0.90
  -2  16   0    1.61    0.94
   2  16   0    0.61    0.84
   2  16   0    0.44    0.51
  -2  16   0    0.79    0.68
   3 -16   0   17.32    1.57
  -3 -16   0   17.68    1.34
  -3 -16   0   19.16    1.56
  -3  16   0   22.09    1.93
   3  16   0   20.82    1.23
   3  16   0   19.40    1.64
  -3  16   0   18.90    1.63
  -4 -16   0    3.70    0.64
   4 -16   0    4.70    1.02
  -4  16   0    4.53    0.94
   0 -17   0   -0.24    1.13
   0 -17   0   -0.25    0.58
   0  17   0    0.46    1.06
   0  17   0   -0.04    0.64
   1 -17   0    0.04    1.12
  -1 -17   0    1.95    0.55
   1 -17   0    1.67    0.72
  -1 -17   0    0.20    1.08
  -1 -17   0    3.28    0.92
   1  17   0    2.39    0.68
   1  17   0    2.57    1.03
  -1  17   0    3.23    1.08
  -1  17   0    3.45    0.75
   2 -17   0    1.52    1.16
  -2 -17   0    4.36    0.96
  -2 -17   0    3.12    0.66
  -2  17   0    4.65    1.13
   2  17   0    3.77    0.65
  -2  17   0    3.83    0.85
   2  17   0    3.03    1.02
  -3 -17   0    6.59    0.85
   3  17   0    8.70    1.03
  -3  17   0    7.81    1.34
   0 -18   0   16.02    1.96
   0  18   0   13.51    2.10
   0  18   0   12.75    1.33
  -1 -18   0   25.18    2.17
  -1  18   0   22.22    2.39
   1  18   0   23.69    2.28
  -1  18   0   19.01    1.63
   1  18   0   20.90    1.56
  -2 -18   0    3.16    1.08
   2 -18   0    1.54    1.39
  -2 -18   0    1.47    0.66
  -2  18   0    5.09    1.32
   2  18   0    3.40    1.21
  -8   0   1    0.39    0.41
  -8   0   1    0.36    0.77
   7   0  -1    5.76    0.58
  -7   0   1    3.91    0.68
  -7   0   1    6.76    0.72
   7   0  -1    5.88    0.62
  -6   0   1   43.79    2.19
  -6   0   1   44.37    2.37
  -5   0   1    7.05    0.77
  -5   0   1    7.38    0.79
   4   0  -1   50.87    2.43
  -4   0   1   52.93    2.49
  -4   0   1   57.64    2.81
   3   0  -1   52.63    2.41
  -3   0   1   53.21    2.44
  -3   0   1   55.28    2.77
  -2   0   1   43.77    2.64
  -2   0   1   57.08    2.32
   2   0  -1   52.84    2.31
  -1   0   1  442.57   20.07
  -1   0   1  472.42   22.79
   0   0   1  195.93    8.73
   0   0  -1  200.71    8.68
  -1   0  -1   26.55    1.28
   1   0   1   28.64    1.27
  -1   0  -1   27.27    1.28
   1   0   1   25.37    1.44
  -1   0  -1   28.91    1.44
   2   0   1  514.90   22.59
  -2   0  -1  520.71   22.54
  -2   0  -1  514.46   25.57
   2   0   1  518.39   25.56
  -3   0  -1    0.07    0.27
   3   0   1    0.50    0.30
  -3   0  -1    0.54    0.26
   3   0   1    0.52    0.23
   4   0   1    2.28    0.31
  -4   0  -1    3.00    0.52
   4   0   1    2.68    0.41
  -4   0  -1    1.82    0.40
   5   0   1    6.01    0.53
  -5   0  -1    5.91    0.72
  -5   0  -1    6.94    0.62
   6   0   1   14.85    0.79
   6   0   1   15.04    0.85
  -6   0  -1   14.19    0.92
  -6   0  -1   14.07    1.03
   8  -1  -1    0.36    0.43
  -8  -1   1    0.81    0.67
   8  -1  -1   -0.31    0.39
   8  -1  -1   -1.66    1.03
   8   1  -1    0.43    0.33
  -8   1   1    0.47    0.78
  -8   1   1    0.87    0.54
   7  -1  -1   24.15    1.30
  -7  -1   1   24.79    1.31
  -7   1   1   25.71    1.50
  -7   1   1   21.52    1.57
   7   1  -1   20.73    1.45
   6  -1  -1   25.17    1.25
  -6  -1   1   24.01    1.33
  -6  -1   1   22.64    1.34
  -6   1   1   23.99    1.47
   6   1  -1   22.49    1.14
   6   1  -1   19.77    1.38
  -6   1   1   23.78    1.41
   6   1  -1   25.10    1.14
  -5  -1   1    9.37    0.76
  -5  -1   1    9.38    0.78
   5  -1  -1   11.16    0.75
   5   1  -1    8.30    0.85
  -5   1   1    9.90    0.89
  -5   1   1    8.60    0.90
   4  -1  -1   90.32    3.62
  -4  -1   1   85.72    4.07
  -4  -1   1   79.36    3.60
   4   1  -1   67.68    4.06
  -4   1   1   77.28    3.65
  -4   1   1   81.59    4.12
   3  -1  -1   75.02    3.10
  -3  -1   1   67.46    3.08
  -3   1   1   66.07    3.12
  -3   1   1   71.06    3.54
   3   1  -1   65.01    3.48
  -2  -1   1   26.58    1.19
   2  -1  -1   21.07    1.43
   2  -1  -1   25.65    1.23
   2   1  -1   27.91    1.37
  -2   1   1   24.22    1.25
  -1  -1   1  556.53   26.85
  -1  -1   1  509.90   23.65
   1  -1  -1  471.30   23.68
  -1   1   1  572.52   23.72
  -1   1   1  588.16   26.93
   0  -1   1  445.18   21.03
   0   1  -1  462.01   23.85
   0   1   1  551.90   23.90
   0   1   1  480.10   21.02
   0   1  -1  459.13   21.03
   1  -1   1   84.25    3.84
  -1  -1  -1   94.30    3.81
   1  -1   1   79.72    3.85
   1  -1   1   79.01    4.35
   1   1   1   95.10    4.33
  -1   1  -1   89.06    3.86
   1   1   1   89.38    3.81
  -1   1  -1   78.58    3.84
  -1   1  -1   90.48    4.36
   2  -1   1  480.72   24.32
  -2  -1  -1  523.76   24.41
  -2  -1  -1  465.19   21.51
   2  -1   1  485.40   21.48
   2  -1   1  483.68   21.44
   2   1   1  471.44   24.31
  -2   1  -1  496.48   21.48
  -2   1  -1  505.91   24.40
   2   1   1  512.02   21.52
   3  -1   1  178.38    8.21
  -3  -1  -1  192.61    9.25
   3  -1   1  175.36    8.19
   3  -1   1  182.92    9.31
   3   1   1  180.84    9.26
   3   1   1  199.02    8.15
  -3   1  -1  196.12    9.30
   4  -1   1   10.54    0.80
  -4  -1  -1   12.17    0.75
   4  -1   1   11.67    0.92
   4  -1   1   11.35    0.83
  -4   1  -1   10.25    0.90
   4   1   1   13.18    0.68
   4   1   1   13.00    0.64
  -4   1  -1   12.04    0.89
  -5  -1  -1   34.89    1.80
   5  -1   1   32.60    1.67
  -5   1  -1   32.87    1.77
  -5   1  -1   32.83    1.89
   5   1   1   37.56    1.58
   5   1   1   35.23    1.56
  -6  -1  -1    0.22    0.36
   6  -1   1    0.16    0.31
  -6   1  -1    0.37    0.48
   6   1   1   -0.47    0.36
  -6   1  -1   -0.05    0.35
   7  -1   1    2.69    0.44
   7  -1   1    2.69    0.36
  -7  -1  -1    2.79    0.48
  -7   1  -1    2.63    0.66
  -7   1  -1    2.75    0.47
   8  -2  -1    1.63    0.55
  -8   2   1    1.52    0.88
  -8   2   1    2.43    0.63
   7  -2  -1   22.51    1.32
   7  -2  -1   25.06    1.35
  -7  -2   1   22.18    1.30
   7  -2  -1   21.11    1.57
  -7   2   1   22.76    1.51
  -7   2   1   20.07    1.61
   6  -2  -1   44.12    2.04
  -6  -2   1   41.16    2.10
  -6  -2   1   39.63    1.99
   6   2  -1   41.49    2.16
  -6   2   1   39.13    2.14
  -6   2   1   42.31    2.34
  -5  -2   1    0.07    0.28
  -5  -2   1    0.22    0.34
   5  -2  -1    0.59    0.68
   5  -2  -1    0.82    0.41
   5   2  -1    1.01    0.38
  -5   2   1   -0.11    0.48
   5   2  -1    0.51    0.17
  -5   2   1    0.20    0.49
  -4  -2   1   48.79    2.37
   4  -2  -1   48.77    2.19
   4   2  -1   42.26    2.06
   4   2  -1   48.83    2.38
  -4   2   1   44.61    2.23
  -4   2   1   44.10    2.50
   3  -2  -1    4.35    0.50
   3   2  -1    2.68    0.42
  -3   2   1    3.44    0.56
  -3   2   1    3.15    0.48
  -2  -2   1   57.09    2.90
  -2  -2   1   53.87    2.89
   2  -2  -1   57.21    2.61
  -2   2   1   58.39    2.63
   2   2  -1   60.50    2.90
   1  -2  -1    3.66    0.46
  -1  -2   1    2.65    0.47
  -1  -2   1    3.15    0.38
  -1  -2   1    3.42    0.38
   1  -2  -1    3.14    0.56
  -1  -2   1    2.98    0.40
   1   2  -1    3.19    0.41
  -1   2   1    3.19    0.48
  -1   2   1    3.30    0.56
   1   2  -1    3.79    0.40
   0  -2   1  381.58   17.60
   0  -2   1  372.65   20.08
   0   2  -1  411.82   20.10
   0   2   1  412.86   17.72
   0   2   1  439.95   20.10
   0   2  -1  402.83   17.60
   1  -2   1   61.22    2.96
   1  -2   1   61.16    3.35
   1  -2   1   61.23    2.96
  -1  -2  -1   71.89    2.89
  -1   2  -1   65.25    2.97
  -1   2  -1   65.97    3.35
   1   2   1   72.33    2.89
  -2  -2  -1   11.84    0.54
   2  -2   1    9.01    0.78
  -2  -2  -1    9.93    0.54
   2  -2   1    9.38    0.69
   2  -2   1    9.62    0.72
  -2   2  -1   10.68    0.77
   2   2   1   11.18    0.60
   2   2   1   11.44    0.52
  -2   2  -1   10.59    0.73
   3  -2   1   15.62    0.95
   3  -2   1   14.28    0.91
  -3  -2  -1   15.97    0.76
   3  -2   1   14.62    1.04
  -3   2  -1   14.53    0.96
   3   2   1   14.73    0.83
  -3   2  -1   14.20    1.02
   3   2   1   17.24    0.70
   3   2   1   15.20    0.69
   3   2   1   15.78    0.85
   4  -2   1    4.17    0.49
   4  -2   1    3.91    0.76
   4  -2   1    4.69    0.72
  -4  -2  -1    4.78    0.44
  -4   2  -1    5.21    0.58
  -4   2  -1    3.83    0.72
  -5  -2  -1    4.60    0.49
   5  -2   1    5.20    0.73
   5  -2   1    5.81    0.69
  -5   2  -1    5.31    0.75
   5   2   1    5.42    0.49
  -5   2  -1    4.50    0.60
   6  -2   1   17.95    1.15
  -6  -2  -1   18.26    0.97
   6  -2   1   17.79    1.07
  -6   2  -1   17.20    1.20
  -6   2  -1   17.71    1.31
   7  -2   1    3.56    0.48
  -7  -2  -1    4.33    0.58
  -7   2  -1    4.31    0.77
  -7   2  -1    4.39    0.77
   8  -3  -1    1.08    0.60
  -8  -3   1    0.74    0.41
  -8   3   1    0.72    0.95
  -8   3   1    2.32    0.67
  -7  -3   1   20.76    1.20
   7  -3  -1   23.58    1.61
   7  -3  -1   23.88    1.44
  -7   3   1   23.73    1.58
  -7   3   1   20.77    1.64
   6  -3  -1   17.58    1.13
  -6  -3   1   16.66    0.96
  -6   3   1   15.80    1.29
  -6   3   1   16.15    1.26
   5  -3  -1   12.43    0.93
  -5  -3   1   10.88    0.73
  -5   3   1   11.26    1.06
   5   3  -1   11.31    0.71
  -5   3   1   10.50    1.10
  -4  -3   1   50.41    2.40
  -4  -3   1   46.36    2.16
   4  -3  -1   48.70    2.29
  -4  -3   1   52.68    2.42
  -4   3   1   45.13    2.33
  -4   3   1   46.44    2.62
   4   3  -1   45.26    2.43
  -3  -3   1   44.28    2.10
   3  -3  -1   42.66    1.98
  -3  -3   1   44.31    1.86
  -3   3   1   39.05    2.26
   3   3  -1   41.84    1.85
  -3   3   1   36.69    1.99
   2  -3  -1   10.10    0.71
  -2  -3   1   11.01    0.64
  -2  -3   1   11.09    0.57
  -2  -3   1    9.83    0.61
  -2   3   1    9.43    0.85
  -2   3   1    8.70    0.73
  -1  -3   1   58.41    2.44
  -1  -3   1   53.65    2.76
   1  -3  -1   47.54    2.82
  -1  -3   1   57.45    2.45
   1  -3  -1   56.11    2.48
   1   3  -1   58.39    2.45
  -1   3   1   50.72    2.48
   1   3  -1   56.60    2.76
   1   3  -1   49.18    2.43
   0  -3  -1  819.67   34.94
   0  -3   1  791.14   34.96
   0  -3  -1  769.57   39.63
   0  -3   1  791.45   39.57
   0  -3   1  825.15   35.01
   0   3   1  751.71   39.56
   0   3  -1  803.72   34.97
   0   3  -1  811.13   39.69
   0   3   1  813.10   34.97
   1  -3   1   43.13    2.12
   1  -3   1   43.12    2.12
  -1  -3  -1   47.44    2.31
   1  -3   1   43.75    2.40
  -1  -3  -1   48.45    2.02
  -1   3  -1   44.82    2.13
   1   3   1   45.99    2.03
  -1   3  -1   46.88    2.41
   2  -3   1   89.64    4.94
  -2  -3  -1  104.52    4.26
   2  -3   1   88.83    4.35
   2  -3   1   95.44    4.38
  -2   3  -1   97.17    4.38
   2   3   1  107.86    4.84
  -2   3  -1   98.05    4.95
   3  -3   1  157.16    7.26
   3  -3   1  164.24    7.28
   3  -3   1  158.62    8.24
  -3  -3  -1  176.17    7.16
  -3   3  -1  165.44    8.24
  -3   3  -1  161.29    7.28
   4  -3   1    1.89    0.47
   4  -3   1    1.93    0.54
   4  -3   1    2.49    0.51
  -4  -3  -1    2.84    0.31
  -4   3  -1    2.10    0.55
  -4   3  -1    2.39    0.56
   5  -3   1   47.18    2.30
   5  -3   1   46.44    2.61
  -5  -3  -1   48.22    2.11
   5  -3   1   45.52    2.32
  -5   3  -1   48.46    2.59
  -5   3  -1   46.83    2.36
  -6  -3  -1    0.32    0.21
   6  -3   1    0.31    0.42
   6  -3   1   -0.55    0.49
  -6   3  -1    0.33    0.61
  -6   3  -1   -0.05    0.46
   7  -3   1    1.48    0.75
   7  -3   1    0.33    0.45
   7  -3   1   -0.48    0.58
  -7   3  -1    0.13    0.48
  -7   3  -1    0.12    0.77
  -8   4   1    1.03    1.08
  -8   4   1    2.19    0.74
   7  -4  -1   22.33    1.68
   7  -4  -1   24.99    1.52
  -7  -4   1   20.58    1.03
  -7  -4   1   21.38    1.06
  -7   4   1   20.60    1.72
  -7   4   1   25.54    1.62
   6  -4  -1   37.27    1.85
  -6  -4   1   33.51    1.59
  -6  -4   1   31.08    1.55
  -6   4   1   35.17    2.09
   5  -4  -1    1.33    0.71
  -5  -4   1    0.28    0.20
   5  -4  -1    1.33    0.50
  -5  -4   1    0.35    0.25
  -5   4   1    0.54    0.63
  -5   4   1    0.14    0.54
  -4  -4   1   52.12    2.34
  -4  -4   1   53.74    2.34
   4  -4  -1   53.49    2.51
  -4   4   1   52.29    2.89
  -4   4   1   50.48    2.56
  -3  -4   1    8.21    0.45
  -3  -4   1    7.23    0.47
  -3  -4   1    8.14    0.44
   3  -4  -1    6.95    0.68
  -3   4   1    6.36    0.83
  -3   4   1    6.22    0.79
  -2  -4   1   30.54    1.53
   2  -4  -1   27.58    1.45
  -2  -4   1   26.75    1.51
  -2  -4   1   30.41    1.35
  -2   4   1   28.92    1.68
  -2   4   1   29.53    1.49
  -1  -4   1   11.41    0.80
  -1  -4   1   11.40    0.72
   1  -4  -1   12.25    0.79
  -1  -4   1   11.23    0.71
   1   4  -1   12.90    0.72
  -1   4   1   12.50    0.82
  -1   4   1   12.08    0.92
   1   4  -1   13.27    0.80
   0  -4   1  199.71    8.73
   0  -4   1  205.31    8.74
   0  -4  -1  176.98    9.89
   0  -4  -1  208.00    8.72
   0  -4   1  201.32    9.91
   0   4  -1  206.37    9.90
   0   4   1  175.45    9.88
   0   4  -1  211.82    8.74
   0   4   1  202.96    8.72
  -1  -4  -1   22.40    1.06
   1  -4   1   22.45    1.23
   1  -4   1   22.11    1.37
  -1   4  -1   23.43    1.37
  -1   4  -1   22.74    1.24
   1   4   1   22.46    1.07
   2  -4   1   90.71    4.90
  -2  -4  -1  102.63    4.76
   2  -4   1   95.00    4.33
  -2  -4  -1  103.39    4.20
  -2   4  -1   94.46    4.33
   2   4   1   84.68    4.76
  -2   4  -1  100.20    4.91
   3  -4   1   77.36    4.07
   3  -4   1   78.86    3.61
   3  -4   1   74.74    3.58
  -3   4  -1   79.53    3.62
  -3   4  -1   79.87    4.07
   4  -4   1    0.13    0.47
   4  -4   1    0.25    0.49
   4  -4   1    0.13    0.53
  -4   4  -1    0.45    0.54
  -4   4  -1    0.37    0.54
   5  -4   1   34.11    1.87
   5  -4   1   34.82    1.83
   5  -4   1   38.40    2.09
  -5   4  -1   35.29    2.07
  -5   4  -1   32.91    1.92
   6  -4   1   14.29    1.08
   6  -4   1   11.82    1.18
  -6   4  -1   13.42    1.16
  -6   4  -1   12.77    1.31
   7  -4   1   13.04    1.34
   7  -4   1   14.74    1.15
  -7   4  -1   14.87    1.64
  -7   4  -1   15.63    1.26
   7  -5  -1   19.92    1.61
   7  -5  -1   21.26    1.57
  -7   5   1   23.81    1.64
  -7   5   1   17.79    1.72
   6  -5  -1    9.61    1.02
  -6   5   1    8.15    1.16
  -6   5   1    8.28    1.13
  -5  -5   1    5.00    0.32
  -5  -5   1    3.43    0.37
   5  -5  -1    4.35    0.63
  -5   5   1    4.16    0.68
  -5   5   1    3.73    0.73
  -4  -5   1   46.50    1.98
   4  -5  -1   43.49    2.20
  -4  -5   1   44.68    1.99
  -4   5   1   43.02    2.55
  -4   5   1   43.28    2.27
   3  -5  -1   56.38    2.66
  -3  -5   1   59.17    2.84
  -3  -5   1   51.48    2.84
  -3  -5   1   61.10    2.51
  -3  -5   1   56.96    2.52
  -3   5   1   56.48    3.05
  -3   5   1   52.76    2.69
  -2  -5   1    8.37    0.53
  -2  -5   1    8.09    0.55
   2  -5  -1    8.75    0.72
  -2  -5   1    7.70    0.60
  -2   5   1    8.04    0.82
  -2   5   1    8.09    0.79
   2   5  -1    9.41    0.52
   1  -5  -1    6.52    0.65
  -1  -5   1    6.98    0.57
  -1  -5   1    6.20    0.63
  -1  -5   1    6.38    0.56
  -1   5   1    6.15    0.67
   1   5  -1    7.26    0.55
  -1   5   1    6.17    0.77
   1   5  -1    6.49    0.61
   0  -5   1  250.43   12.34
   0  -5   1  234.71   10.86
   0  -5   1  261.07   10.89
   0  -5  -1  264.39   10.86
   0   5   1  225.33   12.31
   0   5   1  240.76   10.86
   0   5  -1  251.25   10.88
   0   5  -1  252.64   12.33
  -1  -5  -1   77.84    3.50
   1  -5   1   76.69    4.07
   1  -5   1   78.81    3.61
  -1   5  -1   80.41    3.60
   1   5   1   78.28    3.51
   1   5   1   78.50    3.99
  -1   5  -1   82.03    4.07
  -2  -5  -1   70.93    2.96
   2  -5   1   65.08    3.12
   2  -5   1   65.81    3.54
  -2   5  -1   67.86    3.13
  -2   5  -1   65.80    3.53
   3  -5   1   91.37    4.26
   3  -5   1   88.31    4.81
  -3   5  -1   94.73    4.28
  -3   5  -1   96.44    4.83
   4  -5   1   22.94    1.61
   4  -5   1   22.20    1.44
   4  -5   1   23.81    1.46
  -4   5  -1   22.26    1.51
  -4   5  -1   24.38    1.61
   5  -5   1    1.05    0.53
   5  -5   1    1.01    0.57
   5  -5   1    1.16    0.50
  -5   5  -1    0.79    0.56
  -5   5  -1    0.91    0.62
   6  -5   1    8.62    1.02
   6  -5   1    6.99    1.16
  -6   5  -1    9.56    1.07
  -6   5  -1    8.36    1.29
   7  -5   1    4.45    0.87
   7  -5   1    8.36    1.02
  -7   5  -1    6.61    1.12
  -7   5  -1    6.00    1.03
   7  -6  -1   14.53    1.49
  -7   6   1   18.11    1.45
  -7   6   1   12.33    1.61
   6  -6  -1    6.14    1.03
  -6   6   1    5.81    0.86
  -6   6   1    6.62    0.88
   5  -6  -1    2.98    0.59
  -5   6   1    3.25    0.75
  -5   6   1    2.80    0.65
  -4  -6   1   46.50    2.16
   4  -6  -1   49.12    2.42
  -4  -6   1   52.19    2.15
  -4   6   1   46.19    2.46
  -4   6   1   47.09    2.77
   3  -6  -1    0.47    0.46
   3  -6  -1    0.97    0.63
  -3  -6   1    1.21    0.24
  -3  -6   1    1.58    0.29
  -3  -6   1    1.06    0.22
  -3  -6   1    0.71    0.26
  -3   6   1    0.58    0.58
  -3   6   1    0.52    0.50
  -2  -6   1   27.60    1.59
  -2  -6   1   28.64    1.41
   2  -6  -1   28.61    1.53
  -2  -6   1   30.06    1.40
  -2   6   1   27.28    1.54
   2   6  -1   31.76    1.58
   2   6  -1   32.13    1.39
  -2   6   1   28.14    1.77
  -1  -6   1   28.59    1.47
   1  -6  -1   30.57    1.51
  -1  -6   1   28.91    1.46
  -1  -6   1   28.93    1.65
   1   6  -1   31.32    1.47
  -1   6   1   28.99    1.74
  -1   6   1   28.67    1.54
   1   6  -1   32.06    1.65
   0  -6   1  122.92    6.29
   0  -6  -1  120.05    5.52
   0  -6   1  123.20    5.55
   0   6   1  121.80    5.52
   0   6  -1  124.30    6.28
   0   6   1  125.78    6.27
   0   6  -1  132.10    5.55
  -1  -6  -1   20.78    1.06
   1  -6   1   20.41    1.38
   1  -6   1   20.91    1.25
   1   6   1   20.75    1.07
   1   6   1   22.07    1.24
  -1   6  -1   22.19    1.25
  -1   6  -1   21.49    1.40
  -2  -6  -1   71.45    3.15
   2  -6   1   68.14    3.74
   2  -6   1   69.40    3.32
  -2   6  -1   72.22    3.76
  -2   6  -1   73.15    3.33
   2   6   1   71.91    3.13
   3  -6   1  140.88    7.37
   3  -6   1  139.52    6.50
  -3  -6  -1  146.47    6.29
  -3   6  -1  146.62    6.52
  -3   6  -1  147.69    7.37
   4  -6   1   21.03    1.58
   4  -6   1   19.12    1.39
   4  -6   1   21.38    1.41
  -4   6  -1   21.59    1.49
  -4   6  -1   22.10    1.57
   5  -6   1   25.56    1.66
   5  -6   1   27.04    1.80
   5  -6   1   26.97    1.62
  -5   6  -1   29.17    1.82
  -5   6  -1   26.30    1.71
   6  -6   1   40.72    2.36
   6  -6   1   42.99    2.24
  -6   6  -1   42.41    2.44
  -6   6  -1   42.72    2.51
   7  -6   1    1.90    0.94
   7  -6   1    0.95    0.80
  -7   6  -1    3.60    0.73
  -7   6  -1    2.73    1.06
   7  -7  -1    6.94    0.97
  -7   7   1    6.66    1.06
   6  -7  -1    5.34    0.81
  -6   7   1    7.02    0.95
  -6   7   1    7.16    1.19
   5  -7  -1   10.02    1.00
  -5   7   1    8.49    1.12
  -5   7   1    7.89    1.17
  -4  -7   1   34.98    1.69
  -4  -7   1   40.42    1.67
   4  -7  -1   36.59    1.99
  -4   7   1   34.96    2.04
  -4   7   1   36.42    2.28
  -3  -7   1   40.22    1.89
   3  -7  -1   42.55    2.11
  -3  -7   1   42.53    2.12
  -3  -7   1   38.83    1.89
  -3   7   1   39.48    2.39
  -3   7   1   40.01    2.13
   2  -7  -1   14.63    1.02
  -2  -7   1   13.37    0.82
  -2  -7   1   12.72    0.81
  -2  -7   1   12.07    0.91
   2   7  -1   14.59    0.79
   2   7  -1   14.12    0.90
  -2   7   1   13.20    1.18
  -2   7   1   13.47    1.05
  -1  -7   1  104.23    5.41
   1  -7  -1  110.90    4.81
  -1  -7   1  103.38    4.77
  -1  -7   1  105.24    4.76
   1   7  -1  110.70    4.76
  -1   7   1  106.17    5.45
  -1   7   1  105.71    4.81
   1   7  -1  105.25    5.39
   0  -7   1  209.10   10.38
   0  -7  -1  199.13    9.12
   0  -7   1  206.74    9.16
   0   7   1  203.11    9.13
   0   7  -1  211.53    9.15
   0   7  -1  216.12   10.38
   0   7   1  202.77   10.36
  -1  -7  -1    5.95    0.54
   1  -7   1    5.44    0.88
   1  -7   1    5.53    0.76
   1   7   1    4.86    0.57
  -1   7  -1    4.91    0.76
  -1   7  -1    5.21    0.87
   1   7   1    5.25    0.66
  -2  -7  -1   83.67    3.57
   2  -7   1   78.53    4.25
   2  -7   1   80.21    3.76
  -2   7  -1   78.64    3.74
   2   7   1   80.44    3.56
  -2   7  -1   80.47    4.23
   3  -7   1  159.62    7.30
  -3  -7  -1  166.73    7.07
   3  -7   1  161.44    8.26
  -3   7  -1  162.54    8.26
   3   7   1  155.75    8.02
  -3   7  -1  165.37    7.31
   4  -7   1   23.37    1.66
   4  -7   1   21.80    1.52
   4  -7   1   21.52    1.49
  -4   7  -1   23.78    1.56
  -4   7  -1   23.20    1.69
   5  -7   1   23.99    1.52
   5  -7   1   22.79    1.68
   5  -7   1   20.62    1.55
  -5   7  -1   21.57    1.61
  -5   7  -1   23.89    1.69
   6  -7   1   11.41    1.14
   6  -7   1    8.89    1.41
  -6   7  -1   10.01    1.50
  -6   7  -1   11.58    1.21
   7  -7   1    0.24    0.81
   7  -7   1    3.21    0.69
   7  -7   1    1.70    1.04
  -7   7  -1    3.09    0.74
  -7   7  -1    1.82    1.19
   7  -8  -1    9.81    1.58
  -7   8   1    9.86    1.71
   6  -8  -1   14.08    1.41
  -6   8   1   15.61    1.52
  -6   8   1   16.18    1.54
   5  -8  -1    4.18    0.69
  -5   8   1    4.04    0.76
  -5   8   1    4.03    0.79
   4  -8  -1   17.25    1.32
  -4  -8   1   17.17    0.82
  -4  -8   1   15.20    0.86
  -4   8   1   13.77    1.40
  -4   8   1   15.54    1.34
  -3  -8   1    4.49    0.65
   3  -8  -1    5.94    0.92
  -3  -8   1    5.57    0.60
  -3   8   1    5.06    0.85
  -3   8   1    4.86    0.75
  -2  -8   1   57.67    2.72
  -2  -8   1   56.38    3.10
  -2  -8   1   59.16    2.74
   2  -8  -1   57.68    2.83
   2   8  -1   63.60    2.71
   2   8  -1   60.68    3.08
  -2   8   1   58.67    3.26
  -2   8   1   59.44    2.87
  -1  -8   1   -0.22    0.37
   1  -8  -1    0.58    0.60
  -1  -8   1   -0.13    0.38
   1  -8  -1    0.73    0.43
  -1  -8   1    0.02    0.42
  -1   8   1   -0.13    0.44
  -1   8   1    0.09    0.54
   1   8  -1    0.30    0.38
   1   8  -1   -0.12    0.42
   0  -8   1   60.42    2.83
   0  -8  -1   62.51    2.78
   0  -8   1   58.38    3.19
   0   8   1   58.69    3.17
   0   8   1   56.58    2.78
   0   8  -1   58.32    2.81
   0   8  -1   60.81    3.18
  -1  -8  -1   34.94    1.65
   1  -8   1   33.19    1.79
   1  -8   1   34.41    2.05
  -1   8  -1   33.59    2.04
   1   8   1   33.64    1.90
   1   8   1   32.14    1.65
  -1   8  -1   34.18    1.79
   2  -8   1   26.37    1.78
   2  -8   1   27.81    1.65
  -2  -8  -1   28.18    1.34
   2   8   1   25.31    1.55
  -2   8  -1   26.83    1.65
  -2   8  -1   28.10    1.80
   2   8   1   27.79    1.32
   3  -8   1    9.68    1.15
   3  -8   1    8.56    1.15
  -3  -8  -1   10.17    0.56
   3   8   1    9.42    0.65
  -3   8  -1   10.46    1.20
  -3   8  -1    9.62    1.17
   4  -8   1    5.60    0.76
   4  -8   1    4.39    0.71
   4  -8   1    5.48    0.84
  -4   8  -1    4.53    0.75
  -4   8  -1    5.61    1.12
   5  -8   1   32.91    2.13
   5  -8   1   30.55    1.95
   5  -8   1   33.17    1.93
  -5   8  -1   32.33    2.13
  -5   8  -1   31.30    2.01
   6  -8   1   17.86    1.77
   6  -8   1   20.83    1.46
  -6   8  -1   19.62    1.84
  -6   8  -1   19.67    1.57
   7  -9  -1    2.38    1.02
  -7   9   1    3.73    1.14
   6  -9  -1    7.21    0.98
  -6   9   1    9.02    1.37
  -6   9   1    8.59    1.32
   5  -9  -1    4.51    0.75
  -5   9   1    6.38    1.14
  -5   9   1    4.72    0.80
  -4  -9   1   30.52    1.46
  -4  -9   1   32.03    1.43
   4  -9  -1   31.67    1.78
  -4  -9   1   30.24    1.57
  -4   9   1   26.79    2.00
  -4   9   1   30.10    1.85
   3  -9  -1   59.02    2.87
  -3  -9   1   55.80    2.65
  -3  -9   1   58.43    2.63
  -3  -9   1   53.74    2.99
  -3   9   1   57.97    3.25
  -3   9   1   55.97    2.87
   3   9  -1   59.12    2.59
   2  -9  -1    3.06    0.61
  -2  -9   1    2.25    0.52
  -2  -9   1    1.93    0.43
  -2  -9   1    1.98    0.44
  -2   9   1    3.00    0.74
  -2   9   1    2.09    0.64
   2   9  -1    2.69    0.51
   2   9  -1    2.56    0.41
  -1  -9   1   96.83    4.39
   1  -9  -1   94.53    4.42
  -1  -9   1   91.79    4.37
  -1  -9   1   97.37    4.98
  -1   9   1   97.21    4.43
   1   9  -1   98.07    4.38
   1   9  -1   97.28    4.96
  -1   9   1   97.24    5.04
   0  -9   1   29.97    1.91
   0  -9   1   31.45    1.73
   0  -9  -1   33.77    1.67
   0   9   1   30.61    1.67
   0   9   1   30.30    1.88
   0   9  -1   32.52    1.69
   0   9  -1   31.86    1.93
   1  -9   1   49.70    2.89
  -1  -9  -1   53.02    2.45
   1  -9   1   51.15    2.59
   1   9   1   51.31    2.79
  -1   9  -1   52.58    2.92
   1   9   1   52.05    2.44
  -1   9  -1   51.38    2.59
   2  -9   1   18.69    1.41
   2  -9   1   19.00    1.55
  -2  -9  -1   18.91    1.03
   2   9   1   17.56    1.21
  -2   9  -1   17.94    1.34
   2   9   1   18.88    1.02
  -2   9  -1   18.02    1.56
  -3  -9  -1    0.94    0.43
   3  -9   1    0.80    0.73
   3  -9   1    1.23    0.66
  -3   9  -1    1.50    0.79
   3   9   1    1.33    0.32
  -3   9  -1    0.42    0.68
   4  -9   1    6.18    1.12
   4  -9   1    4.51    0.74
   4  -9   1    6.41    1.01
  -4   9  -1    6.38    0.86
  -4   9  -1    5.97    1.19
   5  -9   1   19.39    1.56
   5  -9   1   18.15    1.47
   5  -9   1   16.88    1.49
  -5   9  -1   18.08    1.56
  -5   9  -1   14.66    1.50
   6  -9   1    7.81    1.20
   6  -9   1   10.87    1.21
  -6   9  -1   11.21    1.28
  -6   9  -1    7.35    1.18
   7 -10  -1    5.49    1.29
  -7  10   1    6.25    1.29
   6 -10  -1    5.89    1.03
  -6  10   1    6.81    1.03
  -6  10   1   10.36    1.43
   5 -10  -1    3.70    0.79
  -5  10   1    3.20    0.76
  -5  10   1    3.39    0.88
  -4 -10   1   10.81    0.68
  -4 -10   1   10.90    0.69
  -4 -10   1   10.53    0.71
   4 -10  -1   10.26    1.11
  -4  10   1    8.93    1.10
  -4  10   1   10.67    1.33
  -3 -10   1   11.60    0.89
   3 -10  -1   12.50    1.23
  -3 -10   1   12.41    0.87
  -3 -10   1   11.58    0.99
  -3  10   1   11.96    1.20
   3  10  -1   13.59    0.78
  -3  10   1    9.37    1.37
   3  10  -1   13.23    0.93
  -2 -10   1   34.97    1.79
  -2 -10   1   34.16    1.81
   2 -10  -1   35.42    1.93
  -2 -10   1   34.72    2.03
   2  10  -1   36.51    1.76
  -2  10   1   33.83    1.99
   2  10  -1   36.52    2.02
  -2  10   1   33.75    2.21
  -1 -10   1    1.49    0.59
  -1 -10   1    1.21    0.53
   1 -10  -1    2.46    0.61
  -1 -10   1    1.54    0.52
   1  10  -1    1.93    0.59
  -1  10   1    1.49    0.60
  -1  10   1    1.73    0.72
   1  10  -1    2.04    0.52
   0 -10   1   39.73    2.39
   0 -10  -1   42.85    2.07
   0 -10   1   40.32    2.14
   0  10   1   37.85    2.35
   0  10  -1   41.80    2.14
   0  10   1   41.18    2.09
   0  10  -1   39.74    2.40
   1 -10   1    0.58    0.59
  -1 -10  -1   -0.21    0.67
  -1 -10  -1    1.44    0.44
   1 -10   1    0.65    0.69
  -1  10  -1    0.39    0.71
  -1  10  -1    0.78    0.64
   1  10   1    0.63    0.46
   1  10   1    0.68    0.57
   2 -10   1    8.83    1.19
  -2 -10  -1   10.69    0.78
   2 -10   1    9.96    1.31
   2  10   1    8.93    0.93
   2  10   1    9.13    0.75
  -2  10  -1    9.92    1.31
  -2  10  -1    8.33    1.17
   3 -10   1   79.86    3.82
   3 -10   1   80.74    4.32
  -3 -10  -1   87.19    3.55
  -3  10  -1   78.24    4.35
   3  10   1   68.16    4.01
  -3  10  -1   81.20    3.86
   4 -10   1   10.67    1.22
   4 -10   1    8.62    1.18
   4 -10   1    9.05    1.21
  -4  10  -1   10.33    1.31
  -4  10  -1    8.90    1.18
   5 -10   1    8.15    1.39
   5 -10   1    8.22    1.29
   5 -10   1   11.27    1.30
  -5  10  -1    6.66    1.05
  -5  10  -1    9.66    1.30
   6 -10   1   24.12    1.69
   6 -10   1   20.01    2.14
  -6  10  -1   23.96    1.82
  -6  10  -1   20.80    2.13
   6 -11  -1    8.30    1.24
  -6  11   1   12.54    1.59
  -6  11   1   10.57    1.50
   5 -11  -1    1.45    0.77
  -5 -11   1    2.08    0.31
  -5 -11   1    2.17    0.32
  -5  11   1    2.63    0.87
  -5  11   1    2.33    0.77
  -4 -11   1   30.97    1.57
  -4 -11   1   33.52    1.55
  -4 -11   1   32.10    1.70
   4 -11  -1   31.01    1.87
  -4  11   1   33.02    2.22
   4  11  -1   30.70    1.71
  -4  11   1   30.84    1.94
   3 -11  -1   91.80    4.31
  -3 -11   1   92.37    4.14
  -3 -11   1   90.80    4.15
  -3 -11   1   86.38    4.70
   3  11  -1   91.09    4.67
  -3  11   1   88.90    4.35
  -3  11   1   92.03    4.94
   3  11  -1   96.63    4.09
  -2 -11   1    0.26    0.49
   2 -11  -1    0.30    0.63
  -2 -11   1    0.06    0.46
   2 -11  -1    0.63    0.82
  -2 -11   1   -0.11    0.54
  -2  11   1   -0.53    0.76
  -2  11   1    0.03    0.64
   2  11  -1    0.30    0.54
   2  11  -1    0.27    0.42
  -1 -11   1   76.08    3.58
  -1 -11   1   72.78    4.04
  -1 -11   1   74.45    3.57
   1 -11  -1   77.38    3.61
  -1  11   1   74.14    4.10
   1  11  -1   78.19    4.03
   1  11  -1   78.20    3.56
  -1  11   1   74.07    3.61
   0 -11   1   30.67    2.02
   0 -11  -1   32.32    1.72
   0 -11   1   30.25    1.79
   0  11   1   30.97    1.74
   0  11  -1   30.15    1.76
   0  11   1   30.26    1.95
   0  11  -1   30.38    1.99
   1 -11   1   18.89    1.48
   1 -11   1   19.91    1.66
  -1 -11  -1   20.52    1.27
   1  11   1   19.60    1.27
  -1  11  -1   20.46    1.45
  -1  11  -1   21.31    1.69
   1  11   1   20.90    1.48
   2 -11   1   10.46    1.25
  -2 -11  -1   11.29    0.83
   2 -11   1    8.87    1.14
  -2  11  -1    9.50    1.26
  -2  11  -1   11.32    1.37
   2  11   1   10.41    0.82
   2  11   1   10.12    1.00
  -3 -11  -1   24.09    1.21
   3 -11   1   23.16    1.61
   3 -11   1   24.48    1.80
   3  11   1   23.48    1.08
  -3  11  -1   25.26    1.84
  -3  11  -1   23.34    1.63
   4 -11   1   27.98    1.96
  -4 -11  -1   26.51    1.26
   4 -11   1   25.89    1.77
   4 -11   1   26.38    1.83
  -4 -11  -1   27.39    1.24
  -4  11  -1   26.90    1.86
  -4  11  -1   29.26    2.03
   5 -11   1    1.80    0.90
   5 -11   1    3.37    0.77
   5 -11   1    0.65    0.80
  -5  11  -1    0.62    0.83
  -5  11  -1    2.63    0.84
   6 -11   1   10.91    1.33
  -6  11  -1    9.94    1.40
   6 -12  -1    0.90    1.12
  -6  12   1    1.26    0.98
  -5 -12   1    4.81    0.45
  -5 -12   1    4.75    0.49
   5 -12  -1    5.59    0.95
  -5  12   1    5.24    0.90
  -5  12   1    5.61    1.03
  -4 -12   1    5.85    0.63
  -4 -12   1    5.77    0.68
   4 -12  -1    3.46    0.78
  -4 -12   1    5.42    0.69
  -4  12   1    4.05    0.80
  -4  12   1    5.09    1.00
   4  12  -1    4.56    0.62
  -3 -12   1   18.28    1.38
   3 -12  -1   20.63    1.45
  -3 -12   1   20.33    1.21
  -3 -12   1   16.33    1.15
   3  12  -1   21.37    1.09
   3  12  -1   21.06    1.32
  -3  12   1   20.72    1.62
  -3  12   1   17.79    1.41
  -2 -12   1   31.23    1.81
  -2 -12   1   35.64    1.85
   2 -12  -1   35.53    1.95
  -2 -12   1   35.25    2.10
  -2  12   1   34.24    2.23
   2  12  -1   38.03    1.80
   2  12  -1   36.25    2.06
  -2  12   1   32.65    1.95
  -1 -12   1    1.49    0.57
   1 -12  -1    0.17    0.79
   1 -12  -1    1.25    0.63
  -1 -12   1    1.68    0.67
  -1 -12   1    1.40    0.57
   1  12  -1    2.18    0.59
   1  12  -1    2.36    0.69
  -1  12   1    1.23    0.76
  -1  12   1    1.15    0.61
   0 -12   1   13.19    1.37
   0 -12   1   13.05    1.20
   0 -12  -1   14.14    1.12
   0  12   1   12.34    1.15
   0  12   1   13.87    1.33
   0  12  -1   12.99    1.37
   0  12  -1   13.32    1.24
   1 -12   1    5.00    0.76
  -1 -12  -1    6.54    0.82
   1 -12   1    5.63    1.09
   1  12   1    5.35    0.85
   1  12   1    5.07    0.76
  -1  12  -1    5.20    0.79
  -1  12  -1    6.78    0.93
   2 -12   1   10.57    1.14
  -2 -12  -1   11.06    0.86
   2 -12   1   10.45    1.29
   2  12   1   11.31    0.86
  -2  12  -1   12.27    1.29
  -2  12  -1   10.35    1.24
   2  12   1   11.56    1.06
  -3 -12  -1   25.57    1.29
   3 -12   1   23.72    1.69
   3 -12   1   25.14    1.89
  -3  12  -1   27.81    1.99
  -3  12  -1   23.84    1.66
   3  12   1   24.94    1.18
  -4 -12  -1   20.03    1.04
  -4 -12  -1   20.23    1.00
   4 -12   1   21.40    1.62
   4 -12   1   20.64    1.65
   4 -12   1   21.37    1.74
  -4  12  -1   22.73    1.84
   4  12   1   19.28    1.07
  -4  12  -1   19.21    1.70
   5 -12   1   28.57    2.25
   5 -12   1   34.65    2.08
  -5  12  -1   32.39    2.27
  -5  12  -1   34.50    2.35
   6 -13  -1    3.05    1.33
  -6  13   1    2.89    1.15
   5 -13  -1    4.85    0.96
  -5 -13   1    4.09    0.53
  -5 -13   1    4.06    0.56
  -5  13   1    4.12    0.99
  -5  13   1    4.85    0.90
  -4 -13   1   18.34    1.17
  -4 -13   1   18.23    1.14
   4 -13  -1   18.73    1.55
  -4  13   1   18.89    1.74
  -4  13   1   17.82    1.50
  -3 -13   1   36.24    1.89
   3 -13  -1   35.58    2.11
  -3 -13   1   34.10    1.85
  -3  13   1   36.56    2.43
   3  13  -1   37.38    2.10
   3  13  -1   37.34    1.78
  -3  13   1   35.26    2.11
   2 -13  -1    9.20    1.12
  -2 -13   1    7.86    0.99
  -2 -13   1    6.05    0.84
  -2 -13   1    7.62    1.06
  -2  13   1    8.87    1.31
  -2  13   1    7.30    1.09
   2  13  -1    8.33    0.85
   2  13  -1    7.87    1.03
  -1 -13   1   65.06    3.23
  -1 -13   1   67.13    3.25
   1 -13  -1   65.37    3.26
  -1 -13   1   66.57    3.68
  -1  13   1   63.45    3.26
   1  13  -1   69.76    3.66
   1  13  -1   69.69    3.22
  -1  13   1   68.23    3.76
   0 -13   1   20.64    1.52
   0 -13   1   21.30    1.47
   0 -13   1   22.29    1.68
   0 -13  -1   24.40    1.47
   0  13  -1   24.02    1.73
   0  13   1   22.84    1.71
   0  13   1   22.10    1.47
   0  13  -1   24.51    1.54
  -1 -13  -1    2.62    0.51
   1 -13   1    3.38    0.82
   1 -13   1    2.61    0.66
  -1  13  -1    2.66    0.69
   1  13   1    2.17    0.52
  -1  13  -1    2.51    0.78
   1  13   1    1.50    0.67
   2 -13   1    2.44    0.69
   2 -13   1    2.02    0.78
  -2 -13  -1    1.22    0.43
  -2  13  -1    2.31    0.74
  -2  13  -1    3.00    0.86
   2  13   1    2.97    0.65
   2  13   1    2.32    0.47
  -3 -13  -1   11.62    0.86
   3 -13   1   14.80    1.47
   3 -13   1   12.68    1.34
   3  13   1   12.67    0.74
  -3  13  -1   13.40    1.44
  -3  13  -1   10.18    1.34
   4 -13   1   12.82    1.37
   4 -13   1   13.38    1.49
  -4 -13  -1   11.10    0.76
  -4 -13  -1   11.72    0.82
   4 -13   1   13.80    1.48
  -4  13  -1   12.02    1.44
   4  13   1   11.51    0.79
  -4  13  -1   15.37    1.54
   5 -13   1    3.42    1.18
  -5  13  -1    4.79    1.07
  -5  13  -1    7.62    1.32
  -5 -14   1    3.32    0.44
  -5 -14   1    3.01    0.46
   5 -14  -1    2.28    0.95
  -5  14   1    3.96    0.88
  -5  14   1    3.28    0.98
  -4 -14   1    4.63    0.80
   4 -14  -1    2.13    0.77
  -4 -14   1    4.19    0.78
  -4  14   1    3.79    0.94
  -4  14   1    2.88    0.76
  -3 -14   1    5.95    0.97
  -3 -14   1    4.10    0.57
  -3  14   1    3.17    0.76
  -3  14   1    3.62    0.98
   3  14  -1    4.21    0.70
   3  14  -1    3.68    0.70
   2 -14  -1   17.26    1.32
  -2 -14   1   15.00    1.17
  -2 -14   1   16.77    1.32
  -2 -14   1   16.04    1.46
   2  14  -1   16.11    1.41
  -2  14   1   14.79    1.37
   2  14  -1   18.01    1.16
  -2  14   1   16.04    1.54
  -1 -14   1    1.29    0.55
  -1 -14   1    2.66    0.67
   1 -14  -1    2.10    0.66
   1 -14  -1   -0.21    0.81
  -1 -14   1    2.41    0.76
   1  14  -1    1.83    0.60
   1  14  -1    2.58    0.73
  -1  14   1    1.31    0.65
  -1  14   1    1.63    0.79
   0 -14   1    8.23    1.26
   0 -14   1    9.52    1.12
   0 -14  -1    9.20    1.02
   0 -14   1    7.57    1.05
   0  14   1    7.13    1.04
   0  14  -1    9.05    1.24
   0  14  -1    8.40    1.12
   0  14   1    7.24    1.24
   1 -14   1    1.13    0.63
  -1 -14  -1    0.66    0.47
   1 -14   1    1.37    0.75
  -1 -14  -1   -0.10    0.80
   1  14   1    1.59    0.76
  -1  14  -1    1.05    0.67
   1  14   1    0.80    0.54
  -1  14  -1    1.18    0.80
  -2 -14  -1    0.82    0.45
  -2 -14  -1   -0.85    0.77
   2 -14   1    0.65    0.73
   2 -14   1    0.48    0.64
   2  14   1    1.00    0.45
  -2  14  -1    1.12    0.73
  -2  14  -1    0.31    0.83
   2  14   1    0.64    0.65
   3 -14   1   12.70    1.45
   3 -14   1   10.13    1.36
   3 -14   1    8.37    1.27
  -3 -14  -1    9.31    0.86
  -3 -14  -1   11.56    1.07
   3  14   1   10.69    0.73
   3  14   1   11.24    1.13
  -3  14  -1   10.33    1.34
  -3  14  -1   11.36    1.49
   4 -14   1    1.33    0.76
   4 -14   1    1.06    0.82
  -4 -14  -1    0.62    0.39
   4 -14   1    3.39    0.80
  -4 -14  -1    1.53    0.44
   4  14   1    1.03    0.40
  -4  14  -1    2.53    0.86
  -4  14  -1    1.40    0.83
   5 -14   1    6.04    1.36
  -5  14  -1    6.63    1.16
   5 -15  -1    1.93    1.09
  -5 -15   1    0.52    0.48
  -5  15   1    2.72    0.91
  -5  15   1    1.22    0.83
  -4 -15   1   19.81    1.34
   4 -15  -1   19.57    1.65
  -4 -15   1   19.55    1.38
  -4 -15   1   21.33    1.40
  -4  15   1   21.61    1.80
  -4  15   1   17.65    1.51
   3 -15  -1   40.83    2.34
  -3 -15   1   42.79    2.26
  -3 -15   1   40.53    2.15
   3  15  -1   43.51    2.07
   3  15  -1   42.60    2.49
  -3  15   1   42.25    2.72
  -3  15   1   38.68    2.35
  -2 -15   1    1.66    0.69
   2 -15  -1    1.24    0.68
  -2 -15   1    0.72    0.78
  -2 -15   1    1.22    0.49
   2 -15  -1    0.21    0.93
   2  15  -1    2.88    0.80
  -2  15   1    0.36    0.65
   2  15  -1    1.74    0.53
  -2  15   1    1.68    0.92
  -1 -15   1   63.99    3.18
   1 -15  -1   63.26    3.19
  -1 -15   1   59.72    3.10
  -1 -15   1   59.26    3.59
   1  15  -1   68.22    3.60
  -1  15   1   62.59    3.67
  -1  15   1   60.29    3.18
   1  15  -1   65.51    3.11
   0 -15   1   16.16    1.46
   0 -15   1   16.09    1.63
   0 -15  -1   14.32    1.25
   0 -15   1   14.93    1.30
   0  15   1   15.78    1.31
   0  15   1   15.04    1.62
   0  15  -1   16.50    1.37
   0  15  -1   16.80    1.55
   1 -15   1    5.53    0.89
   1 -15   1    4.73    0.77
  -1 -15  -1    6.10    0.88
   1 -15   1    7.57    1.35
   1  15   1    6.16    0.96
   1  15   1    6.98    1.32
  -1  15  -1    5.38    0.87
  -1  15  -1    7.80    1.39
   2 -15   1    5.64    1.04
   2 -15   1    6.29    0.95
   2 -15   1    6.33    0.85
  -2 -15  -1    5.09    0.83
   2  15   1    6.56    0.87
  -2  15  -1    6.79    1.35
   2  15   1    6.91    1.23
  -2  15  -1    5.65    0.90
   3 -15   1    8.97    1.30
   3 -15   1    6.82    0.98
  -3 -15  -1    9.69    1.13
   3 -15   1    7.11    1.37
   3  15   1    8.06    1.16
   3  15   1    7.68    0.75
  -3  15  -1    8.86    1.30
  -3  15  -1    9.78    1.52
   4 -15   1    1.31    0.86
  -4 -15  -1    0.10    0.47
   4 -15   1    1.74    0.90
  -4 -15  -1    1.34    0.55
   4  15   1    1.00    0.48
  -4  15  -1    3.57    0.97
  -4  15  -1    2.07    0.84
  -4 -16   1    2.91    0.72
   4 -16  -1    0.87    0.80
  -4 -16   1    1.70    0.67
   4 -16  -1   -0.23    0.93
  -4  16   1    3.05    1.02
  -4  16   1    1.81    0.77
   3 -16  -1    5.74    0.88
  -3 -16   1    7.46    1.32
  -3 -16   1    6.73    0.96
   3  16  -1    7.60    1.31
  -3  16   1    8.32    1.57
   3  16  -1    7.44    0.90
  -3  16   1    6.12    0.90
  -2 -16   1   14.46    1.19
   2 -16  -1   14.94    1.42
  -2 -16   1   17.74    1.57
  -2  16   1   17.21    1.77
   2  16  -1   18.97    1.25
  -2  16   1   15.53    1.45
   2  16  -1   18.40    1.68
   1 -16  -1   -0.19    0.63
  -1 -16   1    1.03    0.95
   1 -16  -1   -1.12    1.01
  -1 -16   1    0.57    0.52
  -1 -16   1    1.30    0.78
  -1  16   1    0.76    0.95
   1  16  -1    1.83    0.92
   1  16  -1    0.36    0.58
  -1  16   1    0.86    0.63
   0 -16   1    4.88    0.92
   0 -16  -1    3.33    0.66
   0 -16   1    3.18    0.70
   0 -16   1    2.48    1.00
   0  16  -1    4.90    0.79
   0  16  -1    4.10    0.99
   0  16   1    4.33    1.10
   0  16   1    4.70    0.76
   1 -16   1    2.39    0.97
   1 -16   1    3.95    0.88
   1 -16   1    1.10    0.67
  -1 -16  -1    1.66    0.54
   1  16   1    2.55    0.93
  -1  16  -1    2.76    0.96
  -1  16  -1    3.33    0.78
   1  16   1    2.64    0.59
  -2 -16  -1    1.92    0.55
   2 -16   1    4.64    0.91
   2 -16   1    3.05    1.01
   2 -16   1    3.18    0.71
  -2  16  -1    2.62    0.79
   2  16   1    2.78    0.89
   2  16   1    3.08    0.59
  -2  16  -1    3.29    0.97
   3 -16   1    2.60    0.93
  -3 -16  -1    4.51    0.81
   3 -16   1    2.75    0.82
  -3 -16  -1    2.73    0.61
   3  16   1    3.93    0.52
  -3  16  -1    5.01    1.06
  -3  16  -1    3.92    0.81
   3  16   1    3.71    0.85
  -3 -17   1   29.89    1.89
  -3 -17   1   33.53    2.17
  -3  17   1   29.63    2.05
  -3  17   1   34.68    2.59
   3  17  -1   31.52    2.30
   3  17  -1   31.62    1.80
  -2 -17   1    0.43    0.94
   2 -17  -1   -1.84    1.20
  -2 -17   1    1.29    0.55
  -2 -17   1   -0.11    1.10
   2 -17  -1   -1.09    0.60
   2  17  -1    0.48    0.56
  -2  17   1    1.53    1.10
   2  17  -1    0.17    0.97
  -2  17   1    0.46    0.67
  -1 -17   1   25.77    2.01
  -1 -17   1   24.55    1.57
   1 -17  -1   22.00    1.63
  -1  17   1   24.46    1.72
   1  17  -1   26.11    2.16
   1  17  -1   24.93    1.63
  -1  17   1   26.18    2.29
   0 -17   1   13.56    1.26
   0 -17   1   11.54    1.95
   0 -17  -1   11.17    1.20
   0 -17   1   17.29    1.73
   0  17   1   15.01    1.90
   0  17  -1   14.82    1.79
   0  17  -1   16.21    1.40
   0  17   1   14.39    1.32
   1 -17   1    1.87    0.65
  -1 -17  -1   -0.68    1.18
   1 -17   1    2.62    1.17
  -1 -17  -1    2.13    0.58
  -1  17  -1    3.83    1.15
  -1  17  -1    2.83    0.77
   1  17   1    4.27    0.73
   1  17   1    4.05    1.17
   2 -17   1    5.29    1.03
   2 -17   1    3.40    0.74
   2 -17   1    1.11    1.11
   2  17   1    3.11    0.69
   2  17   1    3.76    1.13
  -2  17  -1    2.97    0.87
  -2  17  -1    3.51    1.09
  -3 -17  -1   -0.03    0.65
  -3  17  -1    3.98    1.04
   3  17   1    1.75    0.56
  -3  17  -1    3.13    0.80
  -2 -18   1   17.46    2.05
   2  18  -1   14.82    2.07
   2  18  -1   15.14    1.35
  -2  18   1   13.17    1.52
  -2  18   1   18.49    2.26
  -1 -18   1    6.25    1.22
  -1  18   1    8.24    1.23
   1  18  -1    8.16    1.15
   1  18  -1    7.41    1.40
  -1  18   1   10.96    2.08
   0 -18   1    4.16    1.18
   0  18  -1    3.22    1.26
   0  18  -1    2.98    0.78
   0  18   1    3.28    0.71
   0  18   1    3.20    1.36
   1 -18   1   13.31    1.91
   1  18   1    9.75    1.22
  -1  18  -1    8.50    1.50
  -1  18  -1   10.42    1.32
   8   0  -2    8.43    1.24
  -8   0   2   10.79    1.03
   8   0  -2   11.64    0.86
   8   0  -2    9.49    0.80
  -8   0   2    8.13    1.40
  -7   0   2   74.35    3.84
  -7   0   2   73.13    3.50
   7   0  -2   72.41    3.86
   6   0  -2   19.16    1.01
  -6   0   2   17.63    1.17
  -6   0   2   18.42    1.22
   6   0  -2   15.14    1.24
   5   0  -2    2.38    0.67
   5   0  -2    2.44    0.38
  -5   0   2    1.06    0.44
  -5   0   2    1.64    0.51
   4   0  -2  211.58   11.72
  -4   0   2  232.25   10.35
   4   0  -2  262.32   10.34
   3   0  -2    5.93    0.68
   3   0  -2    6.46    0.51
  -3   0   2    5.64    0.54
  -2   0   2  158.70    7.12
  -2   0   2  158.90    8.09
   2   0  -2  162.22    7.12
   2   0  -2  168.38    8.09
   1   0  -2   18.95    0.99
  -1   0   2   18.60    0.98
  -1   0   2   19.72    1.21
   1   0  -2   17.82    1.18
   0   0   2   66.93    3.02
   0   0  -2   70.82    3.02
   0   0   2   66.68    3.43
   0   0   2   65.51    3.00
   0   0  -2   61.71    3.41
   0   0  -2   65.07    3.00
   0   0   2   71.56    3.41
  -1   0  -2    0.10    0.25
   1   0   2    0.29    0.35
  -1   0  -2   -0.06    0.28
  -1   0  -2   -0.14    0.27
   1   0   2   -0.12    0.27
   1   0   2    0.31    0.23
   1   0   2   -0.05    0.28
   2   0   2    6.74    0.58
   2   0   2    6.44    0.62
  -2   0  -2    5.89    0.57
  -2   0  -2    7.26    0.57
  -2   0  -2    7.04    0.60
   2   0   2    7.87    0.52
  -3   0  -2   59.00    2.97
   3   0   2   54.23    2.64
   3   0   2   60.41    2.61
   3   0   2   55.99    2.99
  -3   0  -2   58.04    2.64
  -4   0  -2    0.02    0.37
  -4   0  -2    0.25    0.34
   4   0   2   -0.43    0.39
   4   0   2    0.26    0.27
  -5   0  -2    8.78    0.70
   5   0   2    7.71    0.77
   5   0   2    8.71    0.59
  -5   0  -2    7.96    0.77
  -6   0  -2    0.43    0.45
   6   0   2    0.84    0.25
   6   0   2    1.07    0.35
  -6   0  -2    0.98    0.37
   7   0   2    3.16    0.63
   8  -1  -2   -1.39    0.98
  -8  -1   2    1.99    0.44
   8   1  -2    1.15    0.52
  -8   1   2    2.32    0.64
  -8   1   2    0.57    0.82
  -7  -1   2    5.85    0.78
   7  -1  -2    6.20    1.06
  -7  -1   2    6.74    0.98
   7  -1  -2    6.53    0.78
   7   1  -2    5.48    0.58
  -7   1   2    4.69    0.74
   7   1  -2    6.41    0.82
  -7   1   2    6.78    0.90
  -6  -1   2   16.13    1.08
   6  -1  -2   16.72    1.01
  -6  -1   2   16.37    1.10
   6   1  -2   15.19    1.11
  -6   1   2   15.08    1.15
  -6   1   2   16.00    1.19
   5  -1  -2   39.95    1.78
   5  -1  -2   30.31    2.08
  -5  -1   2   35.23    1.78
  -5  -1   2   35.19    2.00
   5   1  -2   38.77    2.01
  -5   1   2   36.02    2.07
  -5   1   2   34.46    1.85
   4  -1  -2   86.97    3.65
  -4  -1   2   80.34    3.64
  -4   1   2   74.40    3.67
   4   1  -2   80.35    3.61
   4   1  -2   81.63    4.12
  -3  -1   2   27.05    1.37
   3  -1  -2   29.42    1.39
   3  -1  -2   28.47    1.63
   3   1  -2   28.86    1.59
   3   1  -2   30.66    1.37
  -3   1   2   27.16    1.42
   2  -1  -2   83.99    3.79
  -2  -1   2   88.27    3.79
   2  -1  -2   85.82    4.33
  -2  -1   2   81.21    4.31
   2   1  -2   86.26    3.79
  -2   1   2   84.96    3.80
   2   1  -2   87.39    4.31
  -2   1   2   82.96    4.34
   1  -1  -2   64.39    3.17
  -1  -1   2   61.51    2.77
   1  -1  -2   62.84    2.77
  -1  -1   2   57.35    3.13
  -1  -1   2   62.32    2.78
  -1  -1   2   59.89    3.16
  -1   1   2   62.60    2.78
   1   1  -2   56.99    3.16
  -1   1   2   65.40    3.20
   1   1  -2   59.96    2.77
   0  -1  -2  189.68    9.26
   0  -1   2  177.96    9.27
   0  -1  -2  183.81    8.15
   0  -1   2  172.22    9.26
   0  -1   2  185.68    8.16
   0  -1   2  183.78    8.18
   0   1   2  193.26    8.17
   0   1  -2  185.67    8.17
   0   1   2  187.06    8.16
   0   1   2  204.96    9.27
   0   1  -2  190.78    9.27
   0   1  -2  176.79    8.17
   1  -1   2   14.95    0.80
  -1  -1  -2   14.42    0.76
   1  -1   2   13.83    0.90
   1  -1   2   12.25    0.82
  -1  -1  -2   14.97    0.79
  -1   1  -2   12.82    0.81
   1   1   2   13.92    0.85
   1   1   2   14.77    0.74
  -1   1  -2   13.28    0.82
  -1   1  -2   13.72    0.88
   1   1   2   13.73    0.77
   1   1   2   14.37    0.90
  -2  -1  -2   98.56    4.02
   2  -1   2   83.15    4.05
  -2  -1  -2   89.67    4.02
   2  -1   2   85.82    4.59
   2  -1   2   91.53    4.03
  -2   1  -2   83.59    4.05
   2   1   2   87.77    4.55
  -2   1  -2   92.21    4.58
  -2   1  -2   89.74    4.05
   2   1   2   95.25    4.56
   2   1   2   97.40    4.00
   3  -1   2   73.78    3.33
  -3  -1  -2   81.03    3.74
   3  -1   2   72.85    3.80
  -3  -1  -2   74.85    3.31
   3  -1   2   68.83    3.36
  -3   1  -2   72.21    3.36
   3   1   2   75.73    3.28
  -3   1  -2   74.54    3.77
   3   1   2   68.62    3.75
   4  -1   2   17.95    1.33
   4  -1   2   20.37    1.13
  -4  -1  -2   20.03    1.10
   4  -1   2   19.87    1.20
  -4  -1  -2   23.32    1.20
   4   1   2   22.28    1.02
  -4   1  -2   20.93    1.27
   4   1   2   19.40    1.24
  -4   1  -2   20.54    1.23
   5  -1   2   37.40    2.11
   5  -1   2   37.33    1.81
  -5   1  -2   37.34    2.06
  -5   1  -2   37.64    1.91
   5   1   2   38.72    1.76
   5   1   2   38.56    1.72
   6  -1   2   10.77    0.73
  -6   1  -2   11.10    1.04
  -6   1  -2   10.31    0.86
   6   1   2    8.52    0.84
   7  -1   2    0.99    0.74
   7  -1   2   -0.81    0.41
   7  -1   2   -0.21    0.33
  -7  -1  -2    0.17    0.47
  -7   1  -2    0.06    0.64
  -8   2   2    3.37    0.94
   7  -2  -2   27.95    1.47
  -7  -2   2   20.24    1.32
  -7  -2   2   24.79    1.38
  -7   2   2   23.73    1.64
  -7   2   2   27.02    1.64
   7   2  -2   25.48    1.13
   7   2  -2   24.59    1.14
   7   2  -2   21.53    1.42
  -6  -2   2   42.22    2.28
  -6  -2   2   40.90    2.09
   6  -2  -2   47.70    2.12
   6   2  -2   43.53    1.97
  -6   2   2   41.76    2.43
  -6   2   2   41.09    2.21
   6   2  -2   43.34    2.29
  -5  -2   2  128.40    5.99
   5  -2  -2  144.80    6.04
   5   2  -2  142.48    6.79
  -5   2   2  132.96    6.88
  -5   2   2  125.91    6.07
  -4  -2   2  332.42   14.92
   4  -2  -2  343.29   14.95
  -4   2   2  312.06   14.97
   4   2  -2  338.78   16.92
  -4   2   2  379.40   17.01
   3  -2  -2   13.25    0.77
  -3  -2   2   13.21    0.72
  -3  -2   2   11.53    0.88
   3   2  -2   12.35    0.85
   3   2  -2   12.66    0.70
  -3   2   2   12.00    0.82
  -2  -2   2  357.97   14.75
   2  -2  -2  359.59   14.77
  -2  -2   2  359.63   14.76
  -2  -2   2  374.82   16.73
  -2  -2   2  314.84   16.76
   2   2  -2  309.65   14.74
  -2   2   2  352.18   14.77
  -2   2   2  291.05   16.75
   2   2  -2  317.97   16.75
  -1  -2   2  342.59   17.51
  -1  -2   2  330.24   17.51
  -1  -2   2  343.45   15.45
  -1  -2   2  351.84   15.44
   1  -2  -2  353.90   15.44
   1  -2  -2  393.79   17.53
   1   2  -2  337.14   17.51
  -1   2   2  349.32   15.44
  -1   2   2  399.60   17.55
   1   2  -2  335.36   15.46
   1   2  -2  351.30   15.45
   0  -2   2   14.45    0.96
   0  -2  -2   15.29    0.81
   0  -2   2   13.87    0.91
   0  -2  -2   15.91    0.98
   0  -2   2   15.22    0.86
   0   2  -2   15.70    0.91
   0   2  -2   13.79    0.87
   0   2   2   15.03    0.80
   0   2  -2   14.79    0.96
   1  -2   2    9.46    0.80
   1  -2   2    8.79    0.73
  -1  -2  -2   10.35    0.60
  -1  -2  -2   10.14    0.71
   1  -2   2   10.50    0.70
   1   2   2   10.78    0.73
  -1   2  -2   10.02    0.74
   1   2   2   11.14    0.59
  -1   2  -2   10.18    0.72
  -1   2  -2    9.36    0.71
   1   2   2    9.97    0.60
   2  -2   2   44.46    2.22
   2  -2   2   45.55    2.19
  -2  -2  -2   51.74    2.15
  -2  -2  -2   46.75    2.14
   2  -2   2   45.14    2.50
  -2   2  -2   46.50    2.22
   2   2   2   48.72    2.42
   2   2   2   47.30    2.11
  -2   2  -2   47.45    2.48
  -3  -2  -2   45.21    2.27
   3  -2   2   47.59    2.38
   3  -2   2   49.03    2.68
   3  -2   2   50.99    2.35
  -3   2  -2   54.35    2.65
  -3   2  -2   51.98    2.39
   3   2   2   48.96    2.23
   3   2   2   49.74    2.26
   3   2   2   50.35    2.57
   4  -2   2    0.36    0.49
  -4  -2  -2    0.94    0.29
   4  -2   2    0.81    0.41
   4  -2   2    0.13    0.44
   4   2   2    0.50    0.31
  -4   2  -2    0.57    0.49
   4   2   2    0.84    0.22
  -4   2  -2    0.24    0.42
   4   2   2    1.36    0.38
   4   2   2    0.66    0.18
   5  -2   2   14.59    0.89
   5  -2   2   10.48    1.04
   5  -2   2   13.97    1.02
  -5  -2  -2   12.61    0.78
  -5   2  -2   13.32    1.06
  -5   2  -2   12.91    0.99
   5   2   2   12.92    0.86
   6  -2   2    0.64    0.53
  -6  -2  -2    2.05    0.36
   6  -2   2    1.59    0.55
   6  -2   2    1.86    0.39
  -6   2  -2    2.08    0.61
  -6   2  -2    1.55    0.45
   7  -2   2    2.00    0.43
  -7  -2  -2    1.55    0.42
  -7   2  -2    2.02    0.54
  -7   2  -2    2.03    0.77
   8  -3  -2    4.00    0.76
  -8   3   2    3.61    1.00
  -7  -3   2   10.20    0.97
   7  -3  -2   11.01    1.09
  -7   3   2   12.10    1.17
  -7   3   2   10.29    1.31
  -6  -3   2   26.23    1.36
  -6  -3   2   26.66    1.41
   6  -3  -2   27.86    1.48
  -6   3   2   25.52    1.58
  -6   3   2   22.26    1.65
   6   3  -2   23.49    1.43
   6   3  -2   26.80    1.18
   5  -3  -2    7.06    0.80
  -5  -3   2    4.35    0.50
  -5   3   2    4.81    0.96
  -5   3   2    4.57    0.67
   5   3  -2    5.34    0.45
   5   3  -2    5.24    0.54
  -4  -3   2   66.58    2.91
   4  -3  -2   70.27    3.01
  -4   3   2   64.04    3.43
   4   3  -2   59.25    3.30
  -4   3   2   62.01    3.04
  -3  -3   2   74.93    3.06
  -3  -3   2   70.07    3.47
   3  -3  -2   71.05    3.13
  -3  -3   2   71.93    3.08
  -3  -3   2   61.72    3.48
   3   3  -2   68.09    3.05
  -3   3   2   64.71    3.14
   3   3  -2   64.27    3.48
  -2  -3   2  110.04    5.47
  -2  -3   2  108.77    4.83
   2  -3  -2  112.84    4.85
  -2  -3   2  108.35    4.82
  -2  -3   2  112.39    5.47
  -2   3   2  103.19    4.86
   2   3  -2  106.81    4.82
  -1  -3   2   91.95    4.78
   1  -3  -2   86.08    4.79
   1  -3  -2   96.56    4.22
  -1  -3   2   93.35    4.78
  -1  -3   2   96.04    4.21
  -1  -3   2   99.67    4.23
   1   3  -2   90.87    4.22
   1   3  -2   98.41    4.22
  -1   3   2   97.51    4.23
   1   3  -2   95.62    4.77
  -1   3   2   94.89    4.81
   0  -3  -2  161.11    7.43
   0  -3  -2  147.21    6.53
   0  -3   2  140.29    6.56
   0  -3   2  144.99    6.58
   0  -3   2  148.11    7.45
   0   3   2  152.93    6.54
   0   3  -2  147.29    7.44
   0   3  -2  136.89    6.56
   0   3   2  155.41    7.45
   0   3  -2  152.68    6.58
  -1  -3  -2   90.82    4.27
   1  -3   2   81.54    4.33
   1  -3   2   80.74    3.83
  -1  -3  -2   91.08    3.75
   1  -3   2   82.73    3.81
  -1   3  -2   81.08    3.82
  -1   3  -2   74.01    3.81
  -1   3  -2   82.98    4.32
   1   3   2   79.53    3.75
   1   3   2   97.48    4.29
   1   3   2   89.66    3.75
   2  -3   2  126.69    6.90
  -2  -3  -2  141.13    6.01
   2  -3   2  129.60    6.07
   2  -3   2  129.72    6.10
   2   3   2  140.44    6.82
   2   3   2  147.19    6.00
  -2   3  -2  140.32    6.90
  -2   3  -2  138.42    6.10
   3  -3   2   81.91    3.79
  -3  -3  -2   74.83    3.68
   3  -3   2   80.47    4.31
   3  -3   2   77.27    3.81
  -3   3  -2   84.63    3.82
  -3   3  -2   86.92    4.30
   3   3   2   84.48    3.65
   3   3   2   82.98    4.17
   3   3   2   93.05    3.65
   4  -3   2    4.41    0.88
   4  -3   2    4.38    0.61
   4  -3   2    4.12    0.55
  -4   3  -2    5.55    0.66
  -4   3  -2    5.56    0.85
   4   3   2    5.38    0.45
   5  -3   2   32.01    1.78
   5  -3   2   31.18    1.94
   5  -3   2   34.39    1.70
  -5   3  -2   35.39    1.83
  -5   3  -2   30.65    1.90
   6  -3   2    9.93    0.88
   6  -3   2    8.35    1.11
  -6   3  -2   10.06    1.23
  -6   3  -2   10.21    0.96
   7  -3   2   -0.86    0.82
   7  -3   2    1.14    0.48
  -7   3  -2    0.62    0.56
  -7   3  -2    2.55    0.86
   8  -4  -2   -0.04    1.13
  -8  -4   2    1.95    0.48
  -8  -4   2    0.98    0.33
   8  -4  -2    0.46    0.80
  -8   4   2    2.21    0.75
  -8   4   2    0.36    1.03
   7  -4  -2   25.79    1.57
  -7  -4   2   20.96    1.17
  -7  -4   2   22.99    1.30
  -7   4   2   25.44    1.69
  -7   4   2   21.67    1.72
  -6  -4   2   26.93    1.38
  -6  -4   2   25.65    1.37
   6  -4  -2   30.59    1.57
  -6  -4   2   26.31    1.32
  -6   4   2   26.15    1.67
  -6   4   2   27.15    1.78
  -5  -4   2   61.79    2.84
  -5  -4   2   61.80    3.16
   5  -4  -2   65.90    2.98
  -5   4   2   62.77    3.06
   5   4  -2   60.97    2.77
  -5   4   2   62.32    3.42
   4  -4  -2  116.41    4.93
  -4  -4   2  107.01    4.83
  -4   4   2  104.65    4.96
  -4   4   2  107.71    5.63
   3  -4  -2   27.64    1.42
  -3  -4   2   27.52    1.32
  -3  -4   2   29.00    1.31
  -3  -4   2   27.13    1.47
  -3   4   2   24.70    1.46
  -2  -4   2  153.29    7.89
   2  -4  -2  159.94    6.99
  -2  -4   2  163.39    6.97
  -2  -4   2  161.89    6.95
  -2  -4   2  154.46    7.89
  -2   4   2  157.21    7.01
   2   4  -2  153.70    6.95
   2   4  -2  159.99    7.88
   1  -4  -2   50.00    2.31
  -1  -4   2   49.88    2.33
  -1  -4   2   50.82    2.63
  -1  -4   2   51.49    2.32
  -1   4   2   41.69    2.66
   1   4  -2   53.65    2.32
  -1   4   2   49.68    2.33
   1   4  -2   54.68    2.63
   1   4  -2   49.61    2.32
   0  -4   2   80.85    3.67
   0  -4   2   79.06    3.64
   0  -4  -2   93.00    4.13
   0  -4  -2   84.07    3.61
   0  -4   2   77.23    4.13
   0   4  -2   76.61    3.65
   0   4   2   70.72    4.12
   0   4  -2   84.07    4.13
   0   4  -2   80.75    3.65
   0   4   2   81.92    3.62
   1  -4   2    7.00    0.72
   1  -4   2    7.02    0.80
  -1  -4  -2    9.33    0.63
  -1  -4  -2    8.41    0.51
   1  -4   2    6.89    0.75
   1   4   2    8.69    0.53
  -1   4  -2    7.56    0.78
   1   4   2    6.17    0.71
  -1   4  -2    8.10    0.72
   2  -4   2   28.22    1.79
  -2  -4  -2   31.08    1.40
   2  -4   2   29.67    1.56
   2  -4   2   28.12    1.61
   2   4   2   33.45    1.60
   2   4   2   31.07    1.38
   2   4   2   28.47    1.38
  -2   4  -2   30.23    1.75
  -2   4  -2   30.11    1.60
   3  -4   2   26.56    1.56
   3  -4   2   27.84    1.52
   3  -4   2   25.29    1.70
  -3  -4  -2   25.99    1.27
  -3   4  -2   26.94    1.57
   3   4   2   27.69    1.43
  -3   4  -2   28.31    1.67
   4  -4   2    0.67    0.51
   4  -4   2    0.65    0.55
   4  -4   2    0.30    0.57
  -4   4  -2    0.13    0.55
  -4   4  -2    0.19    0.54
   5  -4   2   18.22    1.36
   5  -4   2   17.85    1.32
   5  -4   2   18.63    1.21
  -5   4  -2   19.34    1.35
  -5   4  -2   19.29    1.36
   6  -4   2    0.09    0.44
   6  -4   2    0.00    0.65
   6  -4   2    0.62    0.57
  -6   4  -2    0.35    0.72
  -6   4  -2    0.34    0.50
   7  -4   2    0.20    0.52
   7  -4   2    0.07    0.88
  -7   4  -2    0.98    0.59
  -7   4  -2    0.88    0.94
  -8   5   2   15.25    1.51
  -7  -5   2   10.44    0.76
  -7  -5   2    9.40    0.62
   7  -5  -2    9.24    1.20
  -7   5   2   10.52    1.20
  -7   5   2    9.44    1.39
   6  -5  -2   17.31    1.25
   6  -5  -2   14.19    1.43
  -6  -5   2   15.77    0.92
  -6  -5   2   16.21    0.85
  -6   5   2   15.90    1.37
  -6   5   2   16.28    1.36
  -5  -5   2   21.94    1.27
   5  -5  -2   25.66    1.46
  -5  -5   2   23.96    1.19
  -5  -5   2   24.15    1.19
  -5   5   2   23.78    1.57
  -5   5   2   25.20    1.72
  -4  -5   2   26.26    1.26
   4  -5  -2   26.46    1.46
   4   5  -2   24.55    1.21
  -4   5   2   24.76    1.74
  -4   5   2   24.46    1.56
  -3  -5   2   18.34    1.08
  -3  -5   2   18.27    0.94
  -3  -5   2   18.74    0.95
  -3  -5   2   17.62    1.04
   3  -5  -2   17.48    1.07
  -3   5   2   16.20    1.15
  -3   5   2   17.17    1.26
  -2  -5   2   25.72    1.46
   2  -5  -2   26.50    1.36
  -2  -5   2   25.87    1.32
  -2  -5   2   26.81    1.49
  -2  -5   2   26.84    1.30
   2   5  -2   27.63    1.30
  -2   5   2   25.50    1.41
   2   5  -2   28.24    1.46
   2   5  -2   23.16    1.29
  -1  -5   2   34.86    1.90
  -1  -5   2   34.40    1.69
  -1  -5   2   34.81    1.68
   1  -5  -2   35.71    1.68
   1   5  -2   31.85    1.68
   1   5  -2   36.99    1.90
   1   5  -2   36.76    1.68
  -1   5   2   32.36    1.69
   0  -5  -2   27.37    1.32
   0  -5   2   26.24    1.40
   0  -5   2   25.21    1.39
   0  -5   2   25.74    1.58
   0   5  -2   27.55    1.57
   0   5   2   28.27    1.35
   0   5  -2   27.93    1.41
   1  -5   2   25.91    1.50
   1  -5   2   26.56    1.67
  -1  -5  -2   31.09    1.54
   1  -5   2   24.98    1.45
  -1  -5  -2   29.41    1.32
  -1   5  -2   27.82    1.47
  -1   5  -2   27.17    1.63
   1   5   2   28.80    1.34
   2  -5   2   99.94    4.80
  -2  -5  -2  112.51    4.66
   2  -5   2   97.98    5.42
   2  -5   2  102.87    4.77
   2   5   2  106.98    4.65
   2   5   2  110.01    4.64
  -2   5  -2  107.46    5.42
  -2   5  -2  106.40    4.81
   3  -5   2   30.44    1.92
  -3  -5  -2   29.49    1.39
   3  -5   2   29.53    1.74
   3  -5   2   29.63    1.69
  -3   5  -2   31.68    1.76
   3   5   2   30.67    1.57
  -3   5  -2   29.63    1.85
   4  -5   2    3.48    0.69
   4  -5   2    4.96    0.67
   4  -5   2    4.38    0.66
  -4   5  -2    4.84    0.74
  -4   5  -2    3.76    0.68
   5  -5   2   45.97    2.75
   5  -5   2   50.38    2.44
   5  -5   2   45.25    2.50
  -5   5  -2   50.85    2.55
  -5   5  -2   49.91    2.74
   6  -5   2   11.65    1.07
   6  -5   2    9.23    1.38
   6  -5   2   14.09    1.25
  -6   5  -2   12.23    1.17
  -6   5  -2   12.92    1.45
   7  -5   2    0.48    0.87
   7  -5   2    0.79    0.58
  -7   5  -2    1.41    1.09
  -7   5  -2    1.01    0.62
   7  -6  -2   19.35    1.56
  -7   6   2   18.43    1.70
  -7   6   2   19.71    1.55
  -6  -6   2   24.13    1.25
   6  -6  -2   26.74    1.61
  -6  -6   2   25.47    1.22
  -6   6   2   25.65    1.80
  -6   6   2   25.02    1.67
   5  -6  -2    8.46    0.93
  -5  -6   2    8.04    0.57
  -5  -6   2    8.87    0.59
  -5  -6   2    8.98    0.60
  -5   6   2    9.82    1.15
  -5   6   2    8.60    1.07
  -4  -6   2   78.73    3.34
  -4  -6   2   68.03    3.76
  -4  -6   2   70.18    3.76
   4  -6  -2   78.68    3.50
  -4   6   2   73.84    3.55
  -4   6   2   75.22    4.01
  -3  -6   2   38.76    2.07
  -3  -6   2   35.47    2.05
   3  -6  -2   40.81    1.96
  -3  -6   2   38.32    1.83
  -3  -6   2   42.50    1.82
  -3   6   2   37.45    2.02
  -3   6   2   37.50    2.28
  -2  -6   2   33.91    1.92
  -2  -6   2   36.39    1.70
  -2  -6   2   35.27    1.72
   2  -6  -2   36.41    1.77
  -2   6   2   32.90    1.79
  -2   6   2   33.71    2.03
   2   6  -2   35.85    1.91
   2   6  -2   38.22    1.70
  -1  -6   2  104.38    4.79
  -1  -6   2  105.59    4.77
  -1  -6   2  106.86    5.43
   1  -6  -2  104.32    4.78
   1   6  -2  108.63    4.78
  -1   6   2  105.50    4.80
   1   6  -2  111.35    5.42
   0  -6   2   75.78    3.43
   0  -6  -2   78.11    3.35
   0  -6   2   70.77    3.40
   0  -6   2   72.88    3.87
   0   6   2   71.31    3.37
   0   6  -2   75.67    3.42
   0   6  -2   74.39    3.84
   1  -6   2    8.07    0.87
   1  -6   2    8.11    0.84
   1  -6   2    8.29    0.96
  -1  -6  -2    9.60    0.79
  -1  -6  -2    9.92    0.60
   1   6   2    9.31    0.66
  -1   6  -2    9.50    0.85
  -1   6  -2    9.46    0.96
   2  -6   2   28.79    1.62
   2  -6   2   27.61    1.64
   2  -6   2   27.73    1.80
  -2  -6  -2   29.82    1.35
  -2   6  -2   29.35    1.65
   2   6   2   27.70    1.35
   2   6   2   29.55    1.33
  -2   6  -2   28.74    1.81
   3  -6   2   34.41    1.97
   3  -6   2   34.15    2.16
  -3  -6  -2   36.17    1.61
   3  -6   2   34.69    1.94
  -3   6  -2   36.46    1.97
   3   6   2   37.20    1.82
   3   6   2   31.93    1.83
  -3   6  -2   37.87    2.15
   4  -6   2    1.09    0.56
   4  -6   2    0.80    0.57
   4  -6   2    1.45    0.60
  -4   6  -2    1.19    0.61
  -4   6  -2    1.73    0.64
   5  -6   2    8.24    1.17
   5  -6   2    8.04    1.08
   5  -6   2   10.46    1.09
  -5   6  -2    9.55    1.14
  -5   6  -2   10.47    1.26
   6  -6   2    0.93    0.80
   6  -6   2    0.93    0.62
   6  -6   2    0.93    0.54
  -6   6  -2    1.63    0.60
  -6   6  -2    1.80    0.87
   7  -7  -2    8.35    1.45
   7  -7  -2    7.21    1.26
  -7   7   2   11.77    1.24
  -7   7   2   10.16    1.53
   6  -7  -2    1.58    0.84
   6  -7  -2    2.52    0.70
  -6  -7   2    2.23    0.30
  -6   7   2    1.93    0.76
  -6   7   2    2.68    0.77
   5  -7  -2    4.41    0.67
  -5  -7   2    5.55    0.47
  -5  -7   2    4.88    0.43
  -5  -7   2    4.92    0.46
  -5   7   2    3.31    0.71
  -5   7   2    4.33    0.79
  -4  -7   2    7.80    0.72
   4  -7  -2    7.74    1.00
  -4  -7   2    6.97    0.63
  -4   7   2    7.66    1.20
  -4   7   2    6.99    1.09
  -3  -7   2   15.03    0.87
  -3  -7   2   13.50    0.88
  -3  -7   2   12.12    0.96
   3  -7  -2   14.84    1.06
  -3  -7   2   14.26    0.99
   3   7  -2   15.46    0.94
  -3   7   2   14.37    1.18
  -3   7   2   13.04    1.25
  -2  -7   2   39.10    2.28
  -2  -7   2   41.51    2.01
  -2  -7   2   40.85    2.04
   2  -7  -2   42.90    2.10
  -2   7   2   42.52    2.15
   2   7  -2   45.57    2.01
  -2   7   2   40.53    2.40
   2   7  -2   45.38    2.28
  -1  -7   2   47.33    2.24
   1  -7  -2   47.66    2.23
  -1  -7   2   45.70    2.53
  -1  -7   2   45.03    2.22
  -1   7   2   45.33    2.27
   1   7  -2   48.15    2.22
   1   7  -2   48.10    2.51
  -1   7   2   44.77    2.56
   0  -7   2   43.64    2.23
   0  -7   2   43.55    2.49
   0  -7  -2   45.59    2.13
   0  -7   2   43.02    2.18
   0   7   2   46.12    2.47
   0   7  -2   46.05    2.22
   0   7  -2   46.66    2.49
   0   7   2   45.75    2.16
   1  -7   2   18.00    1.26
   1  -7   2   17.30    1.16
   1  -7   2   16.88    1.33
  -1  -7  -2   19.79    0.97
  -1   7  -2   17.88    1.21
   1   7   2   17.62    1.00
  -1   7  -2   16.77    1.31
   1   7   2   16.85    1.16
  -2  -7  -2   75.46    3.21
   2  -7   2   68.55    3.41
   2  -7   2   68.21    3.85
   2  -7   2   69.51    3.44
   2   7   2   70.92    3.20
  -2   7  -2   74.70    3.86
  -2   7  -2   73.70    3.43
   3  -7   2   15.78    1.48
  -3  -7  -2   18.13    0.83
   3  -7   2   15.87    1.36
   3  -7   2   15.66    1.32
   3   7   2   15.40    0.97
  -3   7  -2   14.96    1.39
  -3   7  -2   17.81    1.40
   4  -7   2    8.73    1.08
   4  -7   2    6.94    1.10
   4  -7   2    7.76    1.01
  -4   7  -2    8.32    1.11
  -4   7  -2   10.29    1.14
   5  -7   2   35.62    2.33
   5  -7   2   40.12    2.13
   5  -7   2   35.41    2.17
  -5   7  -2   39.68    2.25
  -5   7  -2   38.53    2.35
   6  -7   2   11.56    1.26
   6  -7   2    9.13    1.58
   6  -7   2   11.90    1.15
  -6   7  -2   11.14    1.20
  -6   7  -2   11.71    1.66
   7  -8  -2    6.66    1.09
  -7   8   2    6.51    1.10
  -7   8   2    9.19    1.21
  -6  -8   2    3.83    0.41
   6  -8  -2    3.18    0.76
  -6   8   2    4.17    0.87
  -6   8   2    4.92    0.89
   5  -8  -2   14.27    1.19
  -5  -8   2   14.06    0.75
  -5  -8   2   12.42    0.80
  -5  -8   2   13.38    0.78
  -5   8   2   13.16    1.37
  -5   8   2   13.18    1.27
   4  -8  -2   70.72    3.29
  -4  -8   2   66.70    3.09
  -4   8   2   66.12    3.33
  -4   8   2   67.25    3.74
  -3  -8   2   47.92    2.36
   3  -8  -2   51.43    2.49
  -3  -8   2   52.20    2.34
  -3  -8   2   48.21    2.66
  -3  -8   2   43.02    2.65
  -3   8   2   49.86    2.86
   3   8  -2   54.41    2.32
   3   8  -2   54.10    2.64
  -3   8   2   47.75    2.56
   2  -8  -2   12.47    1.02
  -2  -8   2   12.03    0.91
  -2  -8   2   12.22    0.88
  -2  -8   2   12.13    1.01
   2   8  -2   12.43    0.95
  -2   8   2   11.56    1.07
  -2   8   2   11.35    1.23
   2   8  -2   12.87    0.87
  -1  -8   2   86.73    3.89
  -1  -8   2   78.51    4.39
   1  -8  -2   86.61    3.89
  -1  -8   2   85.88    3.90
   1   8  -2   87.65    4.39
   1   8  -2   87.95    3.88
  -1   8   2   81.85    4.43
  -1   8   2   82.57    3.91
   0  -8   2   59.77    2.90
   0  -8  -2   64.02    2.86
   0  -8   2   62.71    2.97
   0  -8   2   57.84    3.30
   0   8   2   58.85    2.88
   0   8  -2   64.15    3.31
   0   8  -2   62.90    2.94
   0   8   2   61.06    3.28
   1  -8   2   22.37    1.59
  -1  -8  -2   23.07    1.18
   1  -8   2   20.26    1.40
   1  -8   2   21.58    1.49
   1   8   2   22.29    1.22
  -1   8  -2   22.82    1.40
  -1   8  -2   23.46    1.58
   1   8   2   21.79    1.40
   2  -8   2   44.09    2.32
   2  -8   2   43.08    2.35
  -2  -8  -2   49.29    2.08
   2  -8   2   43.30    2.62
  -2   8  -2   45.21    2.35
   2   8   2   43.24    2.40
  -2   8  -2   45.71    2.60
   2   8   2   43.96    2.07
   3  -8   2   29.78    1.85
   3  -8   2   29.68    2.04
   3  -8   2   29.96    1.87
  -3  -8  -2   32.62    1.43
   3   8   2   28.67    1.64
  -3   8  -2   30.31    1.89
  -3   8  -2   32.23    2.06
   4  -8   2    0.13    0.61
   4  -8   2    0.04    0.58
   4  -8   2    0.21    0.60
  -4   8  -2    0.93    0.66
  -4   8  -2    0.29    0.67
   5  -8   2    9.19    1.18
   5  -8   2    5.25    0.90
   5  -8   2    6.69    1.13
  -5   8  -2    8.05    1.17
  -5   8  -2    8.04    1.36
   6  -8   2    1.03    1.02
   6  -8   2    3.03    0.70
   6  -8   2    1.94    0.68
  -6   8  -2    1.39    0.67
  -6   8  -2    2.43    1.03
   7  -9  -2    7.50    1.19
  -7   9   2    6.36    1.16
  -7   9   2    9.39    1.32
   6  -9  -2    0.35    0.75
   6  -9  -2   -1.31    0.82
  -6   9   2    0.12    0.77
  -6   9   2    1.24    0.77
  -5  -9   2    0.98    0.28
  -5  -9   2    1.41    0.31
  -5  -9   2    1.38    0.31
   5  -9  -2    0.77    0.61
   5  -9  -2   -0.62    0.77
  -5   9   2    1.43    0.74
  -5   9   2    1.49    0.67
  -4  -9   2   12.37    0.83
   4  -9  -2   11.42    1.16
  -4  -9   2   12.06    0.87
  -4  -9   2   13.38    0.83
  -4   9   2   11.56    1.24
  -4   9   2   10.50    1.36
  -3  -9   2    0.56    0.47
  -3  -9   2    1.11    0.41
   3  -9  -2    1.08    0.59
  -3  -9   2    0.94    0.41
   3  -9  -2    0.40    0.91
  -3   9   2    1.01    0.65
   3   9  -2    0.60    0.41
   3   9  -2    0.95    0.37
  -3   9   2    0.65    0.75
  -2  -9   2   25.38    1.68
   2  -9  -2   29.61    1.62
  -2  -9   2   27.75    1.49
  -2  -9   2   27.93    1.52
  -2   9   2   25.19    1.64
   2   9  -2   27.61    1.47
   2   9  -2   28.75    1.66
  -2   9   2   26.16    1.82
   1  -9  -2   67.26    3.12
  -1  -9   2   65.74    3.13
  -1  -9   2   63.94    3.14
  -1  -9   2   63.20    3.54
  -1   9   2   63.59    3.15
   1   9  -2   69.00    3.12
   1   9  -2   68.67    3.53
  -1   9   2   66.27    3.58
   0  -9   2   82.17    3.92
   0  -9  -2   86.33    3.83
   0  -9   2   83.10    3.90
   0  -9   2   81.91    4.43
   0   9   2   81.39    3.85
   0   9  -2   84.68    3.90
   0   9   2   82.67    4.39
   0   9  -2   85.39    4.39
   1  -9   2   28.84    1.72
  -1  -9  -2   31.57    1.48
   1  -9   2   28.01    1.89
   1  -9   2   28.83    1.79
   1   9   2   28.08    1.76
   1   9   2   27.59    1.52
  -1   9  -2   29.41    1.90
  -1   9  -2   27.86    1.72
   2  -9   2   38.84    2.22
   2  -9   2   37.75    2.45
  -2  -9  -2   42.43    1.88
   2  -9   2   39.03    2.21
  -2   9  -2   39.95    2.17
   2   9   2   38.18    2.18
   2   9   2   39.10    1.87
  -2   9  -2   39.61    2.44
   3  -9   2   49.84    2.89
   3  -9   2   51.16    2.62
   3  -9   2   45.31    2.55
  -3  -9  -2   51.09    2.23
  -3  -9  -2   50.20    2.52
  -3   9  -2   49.95    2.85
  -3   9  -2   50.62    2.63
   3   9   2   46.03    2.56
   4  -9   2    2.18    0.69
   4  -9   2    1.66    0.70
   4  -9   2    2.06    0.72
  -4   9  -2    2.15    0.74
  -4   9  -2    2.13    0.76
   5  -9   2   15.05    1.34
   5  -9   2   12.49    1.34
   5  -9   2   12.14    1.57
  -5   9  -2   15.15    1.44
  -5   9  -2   12.89    1.51
   6  -9   2   13.45    1.28
   6  -9   2    8.66    1.36
  -6   9  -2   12.20    1.89
  -6   9  -2    9.83    1.28
   7 -10  -2    4.60    1.16
  -7  10   2    4.93    1.20
   6 -10  -2    1.57    0.81
   6 -10  -2   -0.07    0.84
  -6  10   2    2.44    0.82
  -6  10   2    3.17    0.87
  -5 -10   2    2.86    0.34
  -5 -10   2    4.14    0.60
   5 -10  -2    1.80    0.69
  -5 -10   2    2.57    0.41
  -5  10   2    2.59    0.77
  -5  10   2    1.67    0.78
   4 -10  -2   15.87    1.32
  -4 -10   2   18.40    1.04
  -4 -10   2   18.71    1.01
  -4 -10   2   15.68    1.15
  -4 -10   2   17.25    1.10
  -4  10   2   17.75    1.42
  -4  10   2   16.11    1.55
  -3 -10   2   53.68    2.63
   3 -10  -2   55.66    2.76
  -3 -10   2   50.68    2.96
  -3 -10   2   58.45    2.61
   3  10  -2   57.94    2.92
   3  10  -2   57.58    2.57
  -3  10   2   51.97    2.78
  -3  10   2   53.20    3.16
   2 -10  -2    0.96    0.59
   2 -10  -2   -0.06    0.88
  -2 -10   2    1.07    0.50
  -2 -10   2    0.64    0.48
  -2 -10   2    1.24    0.56
  -2  10   2    1.10    0.75
   2  10  -2    1.49    0.58
  -2  10   2    0.31    0.62
   2  10  -2    0.59    0.46
   1 -10  -2  127.19    5.68
  -1 -10   2  115.26    6.42
  -1 -10   2  122.56    5.68
  -1 -10   2  121.16    5.66
  -1  10   2  124.87    6.48
   1  10  -2  128.30    5.66
  -1  10   2  129.00    5.71
   1  10  -2  130.74    6.42
   0 -10  -2  102.56    4.52
   0 -10   2   97.14    4.56
   0 -10   2   95.89    5.19
   0 -10   2   98.83    4.62
   0  10   2   96.16    4.53
   0  10  -2  102.76    4.57
   0  10  -2   99.96    5.17
   0  10   2   96.10    5.16
   1 -10   2   11.49    1.26
   1 -10   2   11.03    1.28
  -1 -10  -2   12.47    0.89
   1 -10   2   10.86    1.28
  -1  10  -2   12.26    1.19
   1  10   2   11.71    0.96
  -1  10  -2   12.58    1.26
   1  10   2   11.89    1.14
  -2 -10  -2   20.14    1.06
   2 -10   2   18.15    1.43
   2 -10   2   17.45    1.64
   2 -10   2   18.97    1.49
  -2  10  -2   18.04    1.48
   2  10   2   18.62    1.07
  -2  10  -2   19.29    1.64
   2  10   2   18.61    1.29
   3 -10   2    7.04    1.17
   3 -10   2    7.32    1.20
  -3 -10  -2    7.43    0.56
  -3 -10  -2    7.47    0.64
   3 -10   2    7.93    1.10
   3  10   2    6.74    0.70
  -3  10  -2    9.76    1.16
  -3  10  -2    8.34    1.20
   4 -10   2    0.17    0.71
   4 -10   2   -0.04    0.67
   4 -10   2    0.83    0.70
  -4  10  -2    0.96    0.73
  -4  10  -2    0.37    0.73
   5 -10   2    3.24    0.93
   5 -10   2    3.99    0.80
   5 -10   2    4.47    0.84
  -5  10  -2    3.94    0.96
  -5  10  -2    4.51    0.87
   6 -10   2    1.82    1.31
  -6  10  -2    4.98    1.28
  -6  10  -2    3.37    0.88
   6 -11  -2   -0.40    0.91
   6 -11  -2   -0.77    0.86
  -6  11   2    1.50    0.89
  -6  11   2    1.53    0.83
  -5 -11   2    0.52    0.41
   5 -11  -2    1.10    0.70
  -5 -11   2    2.10    0.35
   5 -11  -2    0.14    0.84
  -5 -11   2    1.28    0.43
  -5  11   2    1.72    0.74
  -5  11   2    1.93    0.85
  -4 -11   2    4.10    0.59
  -4 -11   2    3.92    0.66
  -4 -11   2    5.23    0.69
   4 -11  -2    3.19    0.70
  -4 -11   2    4.47    0.70
  -4  11   2    4.35    0.77
  -4  11   2    3.33    0.87
  -3 -11   2   14.21    1.01
   3 -11  -2   14.65    1.21
  -3 -11   2   12.68    1.15
  -3 -11   2   15.02    1.03
   3  11  -2   14.96    0.93
   3  11  -2   15.25    1.07
  -3  11   2   11.50    1.19
  -3  11   2   13.00    1.41
  -2 -11   2   45.06    2.30
  -2 -11   2   44.55    2.61
  -2 -11   2   44.52    2.32
   2 -11  -2   47.05    2.36
   2  11  -2   47.79    2.57
  -2  11   2   46.61    2.78
   2  11  -2   45.55    2.26
  -2  11   2   44.23    2.44
   1 -11  -2    4.39    0.67
  -1 -11   2    3.50    0.68
  -1 -11   2    4.24    0.69
  -1 -11   2    3.27    0.76
  -1  11   2    3.30    0.82
   1  11  -2    3.54    0.64
  -1  11   2    2.55    0.66
   1  11  -2    4.38    0.76
   0 -11   2   12.35    1.25
   0 -11  -2   15.40    1.10
   0 -11   2   12.45    1.30
   0 -11   2   13.26    1.42
   0  11   2   14.49    1.34
   0  11  -2   14.26    1.37
   0  11   2   13.90    1.16
   0  11  -2   15.04    1.20
   1 -11   2   24.05    1.79
   1 -11   2   23.76    1.66
  -1 -11  -2   26.40    1.38
   1 -11   2   24.84    1.69
  -1  11  -2   25.15    1.62
   1  11   2   23.16    1.42
  -1  11  -2   26.83    1.79
   1  11   2   23.80    1.67
   2 -11   2    5.05    0.78
   2 -11   2    4.60    0.76
   2 -11   2    4.25    0.82
  -2 -11  -2    5.54    0.62
   2  11   2    4.35    0.48
  -2  11  -2    4.79    0.87
  -2  11  -2    4.62    0.80
   2  11   2    4.13    0.62
   3 -11   2    8.45    1.23
  -3 -11  -2    8.41    0.63
   3 -11   2    6.94    1.21
   3 -11   2    8.12    1.15
  -3 -11  -2    7.43    0.76
  -3  11  -2    8.31    1.16
  -3  11  -2   10.18    1.23
   4 -11   2    0.94    0.73
   4 -11   2    0.12    0.66
  -4 -11  -2    0.33    0.23
   4 -11   2    0.50    0.77
  -4  11  -2    0.25    0.76
  -4  11  -2    0.60    0.74
   5 -11   2   13.04    1.84
   5 -11   2   15.25    1.51
   5 -11   2   13.57    1.48
  -5  11  -2   14.52    1.77
  -5  11  -2   14.75    1.49
   6 -12  -2   -0.59    0.92
  -6  12   2    2.30    0.86
  -6  12   2    1.43    0.92
  -5 -12   2    0.55    0.43
   5 -12  -2   -0.04    0.84
  -5 -12   2    1.10    0.38
  -5 -12   2   -0.12    0.48
   5 -12  -2    0.45    0.73
  -5  12   2    0.46    0.73
  -5  12   2    1.75    0.84
  -4 -12   2   18.38    1.12
   4 -12  -2   18.65    1.38
  -4 -12   2   17.15    1.11
  -4 -12   2   15.66    1.27
  -4 -12   2   17.14    1.17
  -4  12   2   15.79    1.63
  -4  12   2   17.01    1.40
   3 -12  -2   11.86    1.20
  -3 -12   2   11.72    1.19
  -3 -12   2   13.60    1.04
  -3 -12   2   12.48    1.02
   3  12  -2   14.70    0.93
   3  12  -2   14.03    1.09
  -3  12   2   13.16    1.48
  -3  12   2   13.72    1.22
  -2 -12   2    2.32    0.53
   2 -12  -2    2.00    0.59
  -2 -12   2    2.54    0.66
  -2 -12   2    2.50    0.57
  -2  12   2    1.97    0.65
   2  12  -2    2.28    0.52
  -2  12   2    2.75    0.82
   2  12  -2    2.97    0.64
   1 -12  -2   90.04    4.14
  -1 -12   2   90.68    4.14
  -1 -12   2   84.65    4.67
  -1 -12   2   86.14    4.14
   1  12  -2   94.68    4.68
  -1  12   2   85.28    4.70
  -1  12   2   79.04    4.14
   1  12  -2   92.66    4.12
   0 -12  -2   15.23    1.07
   0 -12   2   13.13    1.25
   0 -12   2   12.95    1.22
   0 -12   2   13.08    1.39
   0  12   2   10.97    1.10
   0  12   2   12.85    1.32
   0  12  -2   12.55    1.23
   0  12  -2   12.61    1.31
  -1 -12  -2   13.65    0.99
   1 -12   2   14.31    1.41
   1 -12   2   14.62    1.33
   1 -12   2   13.81    1.25
   1  12   2   14.63    1.06
  -1  12  -2   15.45    1.34
   1  12   2   14.24    1.27
  -1  12  -2   15.84    1.43
   2 -12   2   20.80    1.55
   2 -12   2   20.48    1.68
  -2 -12  -2   20.80    1.19
   2 -12   2   23.33    1.61
   2  12   2   20.48    1.47
  -2  12  -2   21.15    1.53
   2  12   2   20.31    1.21
  -2  12  -2   22.62    1.70
   3 -12   2    5.13    0.89
  -3 -12  -2    2.91    0.40
  -3 -12  -2    1.95    0.58
   3 -12   2    3.22    0.78
   3 -12   2    2.70    0.78
  -3  12  -2    3.81    0.86
  -3  12  -2    4.44    0.91
   4 -12   2    0.58    0.80
  -4 -12  -2    0.05    0.23
   4 -12   2   -0.36    0.66
   4 -12   2    1.37    0.74
  -4 -12  -2    0.53    0.30
  -4  12  -2    0.85    0.80
  -4  12  -2    0.65    0.77
   5 -12   2    4.09    0.90
   5 -12   2    2.99    1.16
  -5  12  -2    4.78    1.12
  -5  12  -2    4.83    0.95
   6 -13  -2    1.57    1.09
  -6  13   2    1.96    0.99
  -6  13   2    3.74    0.97
   5 -13  -2   -0.16    0.76
  -5 -13   2    0.37    0.43
  -5 -13   2    1.14    0.47
   5 -13  -2    0.55    0.82
  -5 -13   2    0.12    0.55
  -5 -13   2   -0.73    0.56
  -5  13   2    2.45    0.85
  -5  13   2    0.66    0.72
  -4 -13   2    2.00    0.47
  -4 -13   2    1.64    0.53
  -4 -13   2    1.61    0.52
  -4 -13   2    1.04    0.59
   4 -13  -2    0.90    0.69
   4 -13  -2   -0.92    0.82
  -4  13   2    0.44    0.68
   4  13  -2    1.49    0.50
  -4  13   2    0.30    0.79
   3 -13  -2   -0.29    0.84
  -3 -13   2    2.16    0.58
   3 -13  -2    0.90    0.61
  -3 -13   2    1.54    0.49
  -3 -13   2    1.33    0.66
   3  13  -2    2.10    0.46
   3  13  -2    2.03    0.60
  -3  13   2    1.15    0.68
  -3  13   2    1.04    0.79
  -2 -13   2    9.85    1.07
  -2 -13   2    8.42    0.97
   2 -13  -2    9.00    1.08
  -2 -13   2    9.55    1.19
  -2  13   2   10.11    1.13
   2  13  -2   10.92    1.14
   2  13  -2    7.81    0.93
  -2  13   2   10.12    1.34
  -1 -13   2   10.12    1.07
  -1 -13   2    9.47    1.15
  -1 -13   2    9.10    1.23
   1 -13  -2   10.43    1.05
   1  13  -2    9.83    1.18
  -1  13   2    9.76    1.27
   1  13  -2   11.01    1.06
  -1  13   2    9.55    1.11
   0 -13   2   15.30    1.48
   0 -13  -2   16.21    1.14
   0 -13   2   15.43    1.32
   0 -13   2   15.45    1.33
   0  13   2   13.80    1.18
   0  13   2   15.05    1.39
   0  13  -2   15.59    1.42
   0  13  -2   14.42    1.29
   1 -13   2   12.70    1.27
   1 -13   2   13.25    1.40
   1 -13   2   11.49    1.24
  -1 -13  -2   12.25    0.96
   1  13   2   11.17    1.01
   1  13   2   11.95    1.29
  -1  13  -2   13.36    1.40
  -1  13  -2   13.47    1.20
   2 -13   2    3.75    0.85
   2 -13   2    2.36    0.71
   2 -13   2    2.56    0.76
  -2 -13  -2    2.81    0.47
   2  13   2    1.95    0.46
  -2  13  -2    2.87    0.85
   2  13   2    2.16    0.66
  -2  13  -2    1.99    0.77
   3 -13   2    4.01    0.83
   3 -13   2    3.59    0.83
  -3 -13  -2    2.98    0.45
   3 -13   2    4.24    0.87
   3  13   2    3.70    0.31
  -3  13  -2    5.92    0.99
  -3  13  -2    3.06    0.83
   4 -13   2    0.17    0.72
   4 -13   2    0.66    0.73
   4 -13   2    0.66    0.83
  -4 -13  -2    0.72    0.36
  -4  13  -2    0.43    0.80
   4  13   2    0.11    0.24
  -4  13  -2    0.34    0.82
   5 -13   2    6.88    1.42
  -5 -14   2    0.98    0.54
   5 -14  -2   -1.08    0.81
   5 -14  -2   -1.13    0.81
  -5 -14   2   -1.21    0.66
  -5 -14   2   -0.69    0.68
  -5 -14   2    0.51    0.50
  -5  14   2    1.92    0.81
  -5  14   2    1.06    0.78
   4 -14  -2   10.06    1.28
  -4 -14   2   10.52    1.28
  -4 -14   2   11.52    1.12
  -4 -14   2   10.99    1.05
  -4 -14   2   11.74    1.01
   4  14  -2   11.51    1.08
  -4  14   2   10.86    1.49
  -4  14   2    9.10    1.25
   3 -14  -2   31.06    1.85
  -3 -14   2   28.10    2.03
  -3 -14   2   31.63    1.80
  -3 -14   2   28.03    1.68
   3  14  -2   32.79    1.94
   3  14  -2   31.51    1.63
  -3  14   2   29.82    1.93
  -3  14   2   30.31    2.19
  -2 -14   2    0.79    0.50
   2 -14  -2    0.46    0.61
  -2 -14   2    0.99    0.76
   2 -14  -2   -1.10    0.90
  -2 -14   2    1.05    0.66
   2  14  -2    0.92    0.52
  -2  14   2    1.61    0.67
   2  14  -2    1.66    0.72
  -2  14   2    1.62    0.83
  -1 -14   2   42.06    2.32
   1 -14  -2   41.93    2.24
  -1 -14   2   41.38    2.63
  -1 -14   2   40.93    2.29
  -1  14   2   41.51    2.29
  -1  14   2   40.86    2.63
   1  14  -2   44.43    2.26
   1  14  -2   44.44    2.59
   0 -14   2   20.41    1.56
   0 -14   2   19.15    1.49
   0 -14  -2   19.75    1.33
   0 -14   2   19.33    1.71
   0  14  -2   17.96    1.45
   0  14   2   18.25    1.34
   0  14  -2   20.72    1.69
   0  14   2   17.82    1.65
  -1 -14  -2   11.66    1.03
   1 -14   2   13.94    1.32
   1 -14   2   13.74    1.50
   1 -14   2   13.34    1.44
  -1  14  -2   14.32    1.38
   1  14   2   12.81    1.10
  -1  14  -2   14.99    1.44
   1  14   2   14.93    1.45
   2 -14   2   21.64    1.79
  -2 -14  -2   22.03    1.27
   2 -14   2   20.61    1.65
   2 -14   2   17.78    1.59
   2  14   2   20.88    1.64
   2  14   2   21.50    1.29
  -2  14  -2   22.08    1.64
  -2  14  -2   20.86    1.83
   3 -14   2    0.51    0.73
   3 -14   2    0.58    0.72
  -3 -14  -2   -0.67    0.42
   3 -14   2   -0.14    0.66
  -3  14  -2    0.87    0.80
   3  14   2    0.25    0.26
  -3  14  -2    1.11    0.75
   4 -14   2    2.57    0.80
   4 -14   2    1.02    0.94
   4 -14   2    1.08    0.75
  -4 -14  -2    1.91    0.47
  -4 -14  -2    0.86    0.37
   4  14   2    1.16    0.38
  -4  14  -2    2.96    0.88
  -4  14  -2    2.94    0.88
  -5 -15   2   -0.53    0.56
   5 -15  -2   -1.45    0.87
  -5 -15   2    0.29    0.64
  -5  15   2    0.23    0.86
  -5  15   2    1.26    0.77
   4 -15  -2   -0.66    0.88
  -4 -15   2    0.61    0.58
   4 -15  -2   -0.91    0.72
  -4 -15   2   -0.06    0.79
  -4 -15   2    0.96    0.62
  -4 -15   2    0.78    0.65
   4  15  -2    0.56    0.63
  -4  15   2    1.99    0.89
  -4  15   2    0.77    0.63
  -3 -15   2    0.90    0.69
  -3 -15   2    0.61    0.47
   3 -15  -2    0.42    0.63
  -3 -15   2    0.62    0.77
   3  15  -2    0.46    0.68
   3  15  -2    0.13    0.45
  -3  15   2    1.35    0.91
  -3  15   2    0.24    0.67
   2 -15  -2   12.27    1.19
  -2 -15   2   14.17    1.14
  -2 -15   2   12.11    1.53
  -2 -15   2   14.48    1.42
  -2  15   2   12.49    1.31
  -2  15   2   13.80    1.60
   2  15  -2   13.87    1.15
   2  15  -2   14.77    1.47
   1 -15  -2    8.27    1.12
  -1 -15   2   11.64    1.39
  -1 -15   2   11.47    1.16
  -1 -15   2   12.00    1.53
  -1  15   2   11.03    1.50
   1  15  -2    9.14    1.44
   1  15  -2   11.45    1.16
  -1  15   2   10.58    1.18
   0 -15   2   10.18    1.33
   0 -15   2   10.63    1.50
   0 -15   2   10.52    1.24
   0 -15  -2    9.92    1.06
   0  15  -2   11.96    1.37
   0  15  -2    9.37    1.20
   0  15   2    8.33    1.07
   0  15   2   12.00    1.51
   1 -15   2    8.16    1.28
   1 -15   2    6.83    1.12
   1 -15   2    8.05    1.29
  -1 -15  -2    5.43    0.82
   1  15   2    7.12    1.05
   1  15   2    6.36    0.98
  -1  15  -2    8.68    1.25
  -1  15  -2    7.23    1.10
  -2 -15  -2    2.24    0.51
   2 -15   2    3.02    0.72
   2 -15   2    4.04    0.88
   2 -15   2    2.14    0.84
  -2  15  -2    2.31    0.75
   2  15   2    2.69    0.56
  -2  15  -2    3.51    0.92
   2  15   2    3.02    0.86
  -3 -15  -2    0.03    0.50
   3 -15   2    0.68    0.77
   3 -15   2    1.82    0.76
   3 -15   2    1.18    0.74
   3  15   2    0.51    0.33
  -3  15  -2    1.80    0.87
  -3  15  -2    1.86    0.77
  -4  15  -2    8.07    1.39
  -4 -16   2   12.43    1.29
  -4 -16   2   13.14    1.29
   4 -16  -2   11.33    1.38
  -4  16   2   13.44    1.34
  -4  16   2   13.56    1.69
  -3 -16   2   20.26    1.68
  -3 -16   2   17.46    1.34
   3 -16  -2   18.47    1.45
  -3 -16   2   18.74    1.89
   3  16  -2   19.61    1.29
  -3  16   2   21.37    1.85
   3  16  -2   20.70    1.71
  -3  16   2   18.49    1.54
  -2 -16   2    0.18    0.91
  -2 -16   2    0.54    0.81
  -2 -16   2   -0.39    0.44
   2 -16  -2   -1.06    1.06
  -2  16   2    1.26    0.95
   2  16  -2   -0.40    0.51
  -2  16   2   -0.98    0.60
   2  16  -2    0.07    0.88
  -1 -16   2   46.76    3.11
  -1 -16   2   46.97    2.58
  -1 -16   2   50.72    2.75
   1 -16  -2   47.85    2.57
   1  16  -2   54.13    2.59
  -1  16   2   45.47    3.12
   1  16  -2   51.55    3.06
  -1  16   2   48.14    2.60
   0 -16   2   25.21    2.09
   0 -16   2   23.29    1.70
   0 -16   2   26.31    1.92
   0 -16  -2   23.29    1.55
   0  16  -2   27.36    2.10
   0  16  -2   27.64    1.74
   0  16   2   25.08    2.15
   0  16   2   23.85    1.62
  -1 -16  -2    4.02    0.62
   1 -16   2    5.10    0.86
   1 -16   2    5.41    1.11
   1 -16   2    8.35    1.43
  -1  16  -2    7.90    1.19
   1  16   2    6.85    1.14
   1  16   2    7.15    0.99
   2 -16   2    8.35    1.50
   2 -16   2    8.97    1.22
  -2 -16  -2    7.11    0.96
   2 -16   2   10.33    1.48
  -2  16  -2   10.52    1.35
   2  16   2   11.19    1.10
  -2  16  -2    9.44    1.52
   2  16   2   10.05    1.56
   3 -16   2    1.09    0.83
   3 -16   2    2.97    0.94
   3 -16   2    1.76    0.85
  -3  16  -2    1.30    0.76
  -3  16  -2    0.45    0.85
   3  16   2    0.54    0.39
  -3 -17   2    4.12    1.25
  -3 -17   2    6.30    1.05
  -3 -17   2    6.69    1.09
   3  17  -2    6.61    1.14
  -3  17   2    4.74    0.86
  -3  17   2    7.19    1.33
   3  17  -2    6.22    1.04
   2 -17  -2    4.62    0.86
  -2 -17   2    6.04    1.08
  -2 -17   2    6.74    1.29
  -2 -17   2    4.74    0.69
  -2  17   2    5.72    0.90
   2  17  -2    6.13    1.03
  -2  17   2    7.61    1.34
   2  17  -2    7.34    1.24
   1 -17  -2   12.35    1.29
  -1 -17   2   18.61    1.87
  -1 -17   2   14.75    1.93
  -1 -17   2   13.00    1.28
  -1  17   2   11.56    1.31
   1  17  -2   16.37    1.92
   1  17  -2   17.90    1.31
  -1  17   2   15.32    2.07
   0 -17   2    1.86    1.03
   0 -17  -2   -0.76    1.19
   0 -17   2    0.67    1.06
   0 -17   2    1.27    0.64
   0  17   2    1.10    0.62
   0  17  -2    1.61    1.12
   0  17  -2    0.91    0.70
   0  17   2    1.23    1.17
  -1 -17  -2    3.50    0.66
   1 -17   2    4.47    0.81
   1 -17   2    4.31    1.23
   1 -17   2    4.51    1.04
   1  17   2    6.52    1.25
  -1  17  -2    3.85    0.81
   1  17   2    6.96    1.05
  -1  17  -2    4.35    1.15
   2 -17   2    6.36    1.08
   2 -17   2    6.23    1.29
   2  17   2    6.67    1.26
  -2  17  -2    7.71    1.33
   2  17   2    8.09    1.20
  -2  17  -2    5.69    1.25
  -2 -18   2    1.31    1.37
  -2 -18   2    2.27    1.20
   2 -18  -2   -1.94    1.46
   2  18  -2    0.57    1.22
   2  18  -2    0.88    0.62
  -2  18   2    1.91    1.40
  -1 -18   2   15.14    2.07
  -1 -18   2   13.77    2.23
  -1  18   2   11.09    1.29
   1  18  -2   12.21    1.27
  -1  18   2   12.00    2.35
   1  18  -2   11.36    2.12
   0 -18   2    5.89    1.29
   0 -18   2    6.28    1.53
   0  18  -2    6.41    0.90
   0  18  -2    7.16    1.43
   0  18   2    7.45    1.55
   0  18   2    6.90    1.18
   1  18   2    8.07    1.22
   1  18   2    7.71    1.45
  -1  18  -2    7.11    1.45
  -8   0   3    2.74    0.65
   8   0  -3    1.56    0.90
  -8   0   3    1.43    0.81
   7   0  -3    0.24    0.75
  -7   0   3    1.28    0.63
   7   0  -3    0.88    0.43
  -7   0   3    1.25    0.55
  -6   0   3   14.16    1.18
   6   0  -3   15.52    1.18
  -6   0   3   14.88    1.11
   6   0  -3   15.73    0.97
   5   0  -3   76.26    3.90
   5   0  -3   78.74    3.39
  -5   0   3   66.79    3.42
  -4   0   3    1.41    0.41
   4   0  -3    1.72    0.66
   4   0  -3    1.08    0.37
   3   0  -3    9.69    0.88
  -3   0   3    8.33    0.96
   3   0  -3   10.37    0.71
  -3   0   3    9.57    0.73
   2   0  -3    4.29    0.54
  -2   0   3    5.01    0.80
   2   0  -3    3.95    0.71
  -2   0   3    4.26    0.55
   1   0  -3   20.66    1.14
  -1   0   3   21.82    1.15
  -1   0   3   21.96    1.37
  -1   0   3   22.69    1.16
   1   0  -3   21.22    1.32
   0   0  -3   17.11    1.15
   0   0   3   18.93    1.04
   0   0   3   19.82    1.21
   0   0   3   18.33    0.99
   0   0   3   18.90    1.13
   0   0  -3   18.46    1.01
   1   0   3   31.98    1.74
  -1   0  -3   30.42    1.52
   1   0   3   28.71    1.52
   1   0   3   31.95    1.48
  -1   0  -3   30.34    1.52
   1   0   3   29.88    1.70
  -2   0  -3   39.15    2.01
   2   0   3   36.23    2.02
  -2   0  -3   34.44    1.79
   2   0   3   33.15    1.79
   2   0   3   38.30    2.04
   2   0   3   37.92    1.75
  -2   0  -3   38.16    1.79
   3   0   3   25.78    1.47
  -3   0  -3   29.61    1.47
   3   0   3   25.97    1.64
  -3   0  -3   23.72    1.46
  -3   0  -3   30.54    1.61
   3   0   3   30.24    1.40
   3   0   3   28.34    1.67
   4   0   3    3.22    0.57
   4   0   3    2.37    0.45
   4   0   3    2.13    0.33
   4   0   3    2.36    0.49
  -4   0  -3    2.14    0.42
  -4   0  -3    2.69    0.45
   5   0   3   58.68    2.65
   5   0   3   56.78    3.09
   5   0   3   56.75    3.09
  -5   0  -3   59.92    2.75
  -6   0  -3    1.08    0.52
   6   0   3    0.07    0.53
   6   0   3    0.93    0.30
   6   0   3    0.62    0.42
   8  -1  -3    6.37    0.96
  -8  -1   3    6.95    0.94
   8  -1  -3    4.87    1.08
  -8  -1   3    9.46    1.05
  -8   1   3    6.36    1.02
  -8   1   3    9.50    1.18
   8   1  -3    8.12    0.76
   8   1  -3    7.10    1.02
   7  -1  -3   20.06    1.24
  -7  -1   3   18.43    1.37
  -7  -1   3   19.15    1.34
   7  -1  -3   16.35    1.48
  -7   1   3   19.81    1.41
   7   1  -3   19.75    1.33
  -7   1   3   18.60    1.45
   6  -1  -3   43.64    1.99
   6  -1  -3   37.48    2.31
  -6  -1   3   37.72    2.01
  -6   1   3   38.54    2.07
   6   1  -3   40.39    2.25
   6   1  -3   40.36    1.92
  -6   1   3   40.10    2.29
   5  -1  -3   99.00    4.23
  -5  -1   3   90.15    4.22
   5  -1  -3   91.00    4.84
   5   1  -3   97.06    4.79
  -5   1   3   85.85    4.26
   5   1  -3   94.50    4.19
  -4  -1   3  259.18   11.39
   4  -1  -3  251.72   12.94
   4  -1  -3  260.99   11.40
   4   1  -3  260.41   11.39
   4   1  -3  271.49   12.93
  -4   1   3  251.22   11.42
   3  -1  -3   42.10    2.24
  -3  -1   3   41.26    1.93
   3  -1  -3   39.25    1.92
  -3   1   3   40.68    1.96
   3   1  -3   39.00    1.91
   3   1  -3   41.14    2.21
  -2  -1   3  354.97   15.91
  -2  -1   3  389.40   18.07
   2  -1  -3  359.30   15.92
   2  -1  -3  373.82   18.06
   2   1  -3  347.14   18.06
   2   1  -3  353.97   15.92
  -2   1   3  355.72   15.92
  -2   1   3  376.54   18.08
  -1  -1   3  226.32   11.17
   1  -1  -3  235.16   11.18
  -1  -1   3  221.66   11.17
  -1  -1   3  221.24    9.86
  -1  -1   3  209.45    9.84
   1  -1  -3  228.78    9.85
   1   1  -3  225.06    9.85
   1   1  -3  217.33   11.18
  -1   1   3  218.04    9.84
  -1   1   3  236.95   11.18
   0  -1   3  134.82    6.60
   0  -1  -3  130.94    5.80
   0  -1   3  130.18    6.59
   0  -1   3  123.36    5.81
   0  -1  -3  126.03    6.58
   0  -1   3  130.22    5.80
   0   1  -3  136.41    5.83
   0   1   3  138.07    6.59
   0   1   3  126.51    5.79
   0   1  -3  127.90    5.81
   0   1   3  135.82    5.81
   1  -1   3   78.13    3.93
   1  -1   3   75.43    3.44
  -1  -1  -3   79.04    3.44
   1  -1   3   73.20    3.92
   1  -1   3   71.62    3.47
   1   1   3   69.94    3.44
  -1   1  -3   76.83    3.47
   1   1   3   79.29    3.91
  -1   1  -3   73.83    3.47
   1   1   3   82.12    3.91
  -1   1  -3   78.03    3.92
   1   1   3   77.56    3.42
   2  -1   3    7.19    0.79
  -2  -1  -3    6.51    0.66
   2  -1   3    8.67    0.66
  -2  -1  -3    7.79    0.66
   2  -1   3    6.26    0.74
   2   1   3    8.35    0.58
   2   1   3    7.76    0.78
   2   1   3    6.47    0.65
   2   1   3    6.53    0.71
  -2   1  -3    7.17    0.74
  -2   1  -3    6.35    0.73
  -2   1  -3    7.32    0.72
  -3  -1  -3   24.61    1.25
   3  -1   3   21.17    1.48
  -3  -1  -3   20.73    1.26
   3  -1   3   21.17    1.35
   3  -1   3   24.56    1.25
   3   1   3   21.41    1.25
   3   1   3   25.57    1.18
   3   1   3   21.02    1.40
  -3   1  -3   24.82    1.33
  -3   1  -3   25.19    1.43
   3   1   3   23.42    1.41
  -4  -1  -3    0.81    0.36
   4  -1   3    0.93    0.45
   4  -1   3    0.49    0.46
   4  -1   3    1.13    0.33
   4   1   3    0.37    0.40
  -4   1  -3    1.02    0.42
  -4   1  -3    0.04    0.41
   4   1   3    0.68    0.26
   4   1   3    1.20    0.50
   5  -1   3    1.15    0.49
  -5  -1  -3    1.36    0.41
   5  -1   3    1.33    0.49
   5  -1   3    1.29    0.33
   5   1   3    1.26    0.26
  -5   1  -3    1.03    0.48
  -5   1  -3    1.36    0.43
   5   1   3    1.55    0.42
   5   1   3    0.95    0.36
   6  -1   3    5.23    1.03
   6  -1   3    5.73    0.97
   6  -1   3    4.37    0.61
   6   1   3    4.44    0.87
  -6   1  -3    4.03    0.65
   8  -2  -3   19.85    1.41
  -8  -2   3   18.11    1.53
  -8  -2   3   19.39    1.29
  -8  -2   3   17.13    1.15
   8   2  -3   18.01    0.94
  -8   2   3   18.88    1.54
   8   2  -3   15.70    1.29
  -8   2   3   18.90    1.78
  -7  -2   3    0.76    0.47
  -7  -2   3    0.93    0.55
   7  -2  -3    1.04    0.54
   7  -2  -3    0.23    0.88
  -7   2   3    0.74    0.67
   7   2  -3    0.71    0.34
   7   2  -3    0.91    0.47
  -7   2   3    0.80    0.60
  -6  -2   3   10.75    0.89
   6  -2  -3   10.94    0.94
   6   2  -3   10.66    0.94
  -6   2   3    9.35    1.08
  -6   2   3   10.75    1.07
  -5  -2   3   28.97    1.50
   5  -2  -3   31.52    1.56
   5  -2  -3   26.51    1.86
  -5  -2   3   24.89    1.77
   5   2  -3   31.27    1.72
  -5   2   3   29.03    1.64
   5   2  -3   28.01    1.45
  -4  -2   3    4.78    0.62
  -4  -2   3    2.92    0.73
  -4   2   3    2.62    0.81
   4   2  -3    3.19    0.42
  -4   2   3    5.81    0.79
   4   2  -3    5.05    0.64
   3  -2  -3  152.60    6.62
   3  -2  -3  156.40    7.54
  -3  -2   3  150.86    6.60
  -3   2   3  141.24    6.63
   3   2  -3  149.19    7.50
   3   2  -3  145.01    6.60
  -2  -2   3  193.91    9.85
   2  -2  -3  199.59    8.69
  -2  -2   3  197.86    8.70
   2  -2  -3  204.28    9.87
  -2  -2   3  197.90    8.68
  -2  -2   3  200.88    9.85
  -2   2   3  186.83    9.88
   2   2  -3  198.40    8.69
   2   2  -3  193.10    9.86
  -2   2   3  199.07    8.70
  -1  -2   3   25.92    1.57
  -1  -2   3   27.01    1.41
   1  -2  -3   28.73    1.38
  -1  -2   3   27.09    1.37
   1  -2  -3   29.30    1.59
  -1  -2   3   27.16    1.62
   1   2  -3   25.93    1.40
   1   2  -3   29.22    1.43
  -1   2   3   28.53    1.38
   0  -2  -3   76.44    3.51
   0  -2   3   74.67    4.02
   0  -2   3   74.24    4.01
   0  -2   3   77.15    3.55
   0  -2   3   80.43    3.53
   0  -2  -3   79.16    4.00
   0   2   3   76.29    3.52
   0   2   3   79.16    3.52
   0   2  -3   80.18    3.55
   0   2  -3   74.84    3.54
   0   2   3   88.83    4.02
   0   2  -3   77.09    4.00
  -1  -2  -3    2.72    0.46
   1  -2   3    2.14    0.47
   1  -2   3    3.36    0.56
   1  -2   3    2.09    0.44
  -1  -2  -3    2.59    0.36
  -1   2  -3    3.74    0.64
   1   2   3    4.18    0.55
   1   2   3    2.92    0.45
   1   2   3    3.71    0.54
  -1   2  -3    4.17    0.65
   1   2   3    2.83    0.50
  -1   2  -3    3.16    0.45
  -2  -2  -3   96.00    4.36
   2  -2   3   94.96    4.43
   2  -2   3   94.39    5.00
   2  -2   3   97.85    4.39
  -2   2  -3   92.82    4.42
   2   2   3   95.14    4.35
   2   2   3  106.78    4.95
   2   2   3   99.01    4.94
  -2   2  -3  101.58    4.42
  -2   2  -3   97.48    4.98
   2   2   3   96.19    4.33
   3  -2   3  119.50    6.24
   3  -2   3  112.03    5.51
  -3  -2  -3  131.48    5.44
  -3  -2  -3  115.19    5.43
   3  -2   3  127.09    5.47
   3   2   3  133.06    6.16
  -3   2  -3  121.58    5.50
   3   2   3  116.75    6.15
   3   2   3  119.78    5.39
  -3   2  -3  124.13    6.20
  -4  -2  -3   31.00    1.49
   4  -2   3   31.04    1.54
   4  -2   3   28.75    1.65
   4  -2   3   28.48    1.80
   4   2   3   29.03    1.47
   4   2   3   29.67    1.40
  -4   2  -3   30.75    1.75
  -4   2  -3   30.18    1.62
   4   2   3   29.52    1.67
   5  -2   3   54.87    3.12
   5  -2   3   54.25    2.79
   5  -2   3   59.52    2.69
   5   2   3   56.90    2.54
   5   2   3   58.71    2.98
   5   2   3   60.57    2.56
  -5   2  -3   58.59    3.07
  -5   2  -3   56.61    2.79
   5   2   3   54.91    2.99
   6  -2   3   15.18    1.32
   6  -2   3   15.32    1.01
   6  -2   3   16.92    1.33
  -6   2  -3   14.96    1.33
  -6   2  -3   15.88    1.16
   8  -3  -3    1.79    0.72
   8  -3  -3    0.24    1.05
  -8   3   3    2.24    0.96
  -7  -3   3    6.97    0.96
  -7  -3   3    7.21    0.81
  -7  -3   3    7.56    0.68
   7  -3  -3    6.83    1.06
  -7   3   3    6.23    0.89
   7   3  -3    7.81    0.59
  -7   3   3    8.58    1.08
   7   3  -3    6.35    0.80
  -6  -3   3    1.39    0.43
   6  -3  -3    3.32    0.88
   6  -3  -3    1.42    0.50
  -6   3   3    2.35    0.63
   6   3  -3    1.82    0.47
  -6   3   3    2.33    0.65
  -5  -3   3   36.45    1.76
   5  -3  -3   38.14    1.86
  -5  -3   3   30.21    1.92
   5   3  -3   36.34    1.71
  -5   3   3   33.43    1.91
  -5   3   3   41.23    2.22
   5   3  -3   34.03    2.01
  -4  -3   3  103.57    5.82
   4  -3  -3  119.15    5.20
  -4  -3   3  126.42    5.16
   4   3  -3  116.94    5.86
   4   3  -3  111.30    5.14
  -4   3   3  115.75    5.24
   3  -3  -3   49.80    2.32
  -3  -3   3   51.14    2.63
  -3  -3   3   52.68    2.29
  -3  -3   3   51.58    2.31
   3  -3  -3   46.76    2.70
  -3  -3   3   46.36    2.58
   3   3  -3   47.38    2.62
   3   3  -3   48.06    2.29
  -3   3   3   49.25    2.36
   2  -3  -3  504.93   22.12
  -2  -3   3  498.50   22.13
  -2  -3   3  466.68   25.08
   2  -3  -3  550.33   25.12
  -2  -3   3  508.93   22.11
  -2  -3   3  506.26   25.08
  -2   3   3  511.86   22.14
   2   3  -3  503.21   22.12
   1  -3  -3   82.12    3.84
  -1  -3   3   82.36    4.38
   1  -3  -3   91.64    4.39
  -1  -3   3   77.65    4.38
  -1  -3   3   84.41    3.88
  -1  -3   3   81.82    3.85
   1   3  -3   87.05    3.88
   1   3  -3   89.11    4.38
  -1   3   3   85.78    3.85
   1   3  -3   88.34    3.87
  -1   3   3   92.07    4.43
   0  -3  -3  214.00    9.33
   0  -3   3  204.48    9.35
   0  -3  -3  220.65   10.59
   0  -3   3  204.74    9.37
   0  -3   3  214.58   10.63
   0   3  -3  205.87   10.61
   0   3   3  211.01    9.33
   0   3   3  240.26   10.63
   0   3  -3  198.96    9.37
   0   3  -3  209.67    9.37
   1  -3   3   59.27    2.83
   1  -3   3   58.72    2.79
   1  -3   3   57.18    3.18
  -1  -3  -3   61.50    2.73
  -1  -3  -3   58.13    3.11
  -1   3  -3   56.67    2.80
  -1   3  -3   59.28    2.80
   1   3   3   61.28    2.74
  -1   3  -3   63.00    3.16
   1   3   3   65.42    2.73
   2  -3   3   38.43    1.92
  -2  -3  -3   40.08    1.85
   2  -3   3   37.15    2.22
   2  -3   3   36.73    1.99
   2   3   3   41.08    2.13
  -2   3  -3   39.89    1.98
   2   3   3   40.55    2.09
  -2   3  -3   40.49    2.19
   2   3   3   39.43    1.82
  -2   3  -3   36.46    1.96
   3  -3   3   31.80    1.70
   3  -3   3   32.19    1.81
  -3  -3  -3   29.93    1.59
   3  -3   3   33.42    1.99
  -3   3  -3   33.40    1.76
  -3   3  -3   33.36    1.92
   3   3   3   31.70    1.79
   3   3   3   34.15    1.53
   4  -3   3   61.09    2.84
   4  -3   3   55.98    2.90
   4  -3   3   55.18    3.24
   4   3   3   58.50    3.09
   4   3   3   63.91    2.67
  -4   3  -3   63.63    2.91
   4   3   3   60.73    2.69
  -4   3  -3   60.69    3.21
   5  -3   3    1.24    0.42
   5  -3   3    0.85    0.53
   5  -3   3    0.51    0.59
  -5   3  -3    1.35    0.59
   5   3   3    1.21    0.31
  -5   3  -3    0.78    0.47
   6  -3   3    0.33    0.41
   6  -3   3   -0.13    0.67
   6  -3   3    0.67    0.57
  -6   3  -3    0.43    0.48
  -6   3  -3    0.13    0.70
  -8  -4   3    8.11    1.17
   8  -4  -3    7.03    0.96
  -8  -4   3    6.84    0.82
  -8   4   3    6.58    1.15
  -8   4   3    9.47    1.22
  -7  -4   3    4.76    0.64
   7  -4  -3    3.51    0.70
  -7  -4   3    3.58    0.44
  -7  -4   3    4.09    0.50
  -7   4   3    2.76    0.69
  -7   4   3    4.40    0.87
  -6  -4   3    3.81    0.57
   6  -4  -3    3.41    0.59
  -6  -4   3    3.57    0.48
  -6  -4   3    4.00    0.53
  -6   4   3    4.89    0.74
  -6   4   3    3.87    0.72
   6   4  -3    4.05    0.48
  -5  -4   3   19.86    1.41
  -5  -4   3   22.49    1.19
   5  -4  -3   23.76    1.35
  -5  -4   3   23.25    1.19
  -5  -4   3   21.56    1.27
  -5   4   3   19.98    1.45
  -5   4   3   19.79    1.61
  -4  -4   3   10.21    0.96
  -4  -4   3   10.11    0.75
   4  -4  -3   10.75    0.89
  -4  -4   3    8.45    0.78
  -4  -4   3    9.26    0.76
  -4   4   3    8.68    1.02
   4   4  -3    9.49    0.72
  -3  -4   3    4.03    0.61
  -3  -4   3    4.01    0.55
  -3  -4   3    3.16    0.42
  -3  -4   3    3.38    0.57
   3  -4  -3    4.46    0.62
  -3   4   3    2.91    0.51
   3   4  -3    3.26    0.55
  -2  -4   3    6.81    0.78
   2  -4  -3    7.74    0.97
  -2  -4   3    7.51    0.64
  -2  -4   3    6.47    0.70
  -2  -4   3    6.11    0.65
   2  -4  -3    8.49    0.70
  -2   4   3    7.67    0.75
   2   4  -3    6.21    0.64
  -2   4   3    5.84    1.03
  -1  -4   3  101.25    4.39
   1  -4  -3   96.33    4.36
  -1  -4   3   93.18    4.98
   1  -4  -3  107.81    4.99
  -1  -4   3  100.27    4.99
  -1  -4   3   98.24    4.41
   1   4  -3   98.72    4.39
   1   4  -3   96.77    4.40
  -1   4   3   98.29    4.39
   1   4  -3   99.60    4.96
  -1   4   3   81.75    4.99
   0  -4   3  155.36    6.88
   0  -4   3  146.64    7.78
   0  -4   3  155.46    6.85
   0  -4  -3  164.54    7.75
   0  -4  -3  152.06    6.81
   0   4  -3  160.27    6.87
   0   4  -3  151.58    6.87
   0   4   3  138.61    7.76
   0   4  -3  156.03    7.78
   0   4   3  163.52    6.83
   1  -4   3  169.93    8.91
   1  -4   3  171.73    7.84
  -1  -4  -3  187.31    8.84
  -1  -4  -3  188.30    7.79
   1  -4   3  173.11    7.87
  -1   4  -3  176.90    8.89
   1   4   3  186.98    7.79
  -1   4  -3  162.98    7.85
  -1   4  -3  177.71    7.86
   1   4   3  165.65    8.85
   1   4   3  184.13    7.79
   2  -4   3   30.20    1.95
  -2  -4  -3   32.92    1.55
   2  -4   3   30.71    1.69
   2  -4   3   30.66    1.77
  -2   4  -3   32.97    1.75
  -2   4  -3   32.58    1.91
   2   4   3   34.99    1.54
   2   4   3   32.77    1.77
   3  -4   3  108.87    5.66
   3  -4   3  101.25    5.00
   3  -4   3  105.62    4.94
  -3  -4  -3  103.11    4.84
  -3   4  -3  115.27    5.62
   3   4   3  106.32    4.81
   3   4   3  110.31    5.48
   3   4   3  117.45    4.80
  -3   4  -3  110.95    4.98
   4  -4   3   10.35    0.95
   4  -4   3   10.62    1.08
   4  -4   3   10.82    1.08
  -4   4  -3   12.05    1.05
   4   4   3   11.28    0.76
  -4   4  -3   11.98    1.09
   5  -4   3   37.27    2.43
   5  -4   3   38.71    2.27
   5  -4   3   43.46    2.13
  -5   4  -3   45.53    2.28
  -5   4  -3   43.91    2.40
   6  -4   3   10.58    1.18
   6  -4   3   10.94    0.96
   6  -4   3    9.76    1.42
  -6   4  -3   10.76    1.07
  -6   4  -3   11.91    1.47
   8  -5  -3    3.77    0.98
  -8  -5   3    3.98    0.68
  -8   5   3    4.78    1.16
  -8   5   3    4.03    0.80
  -7  -5   3   15.15    1.08
  -7  -5   3   15.15    0.93
   7  -5  -3   15.25    1.39
  -7  -5   3   14.72    0.82
  -7   5   3   15.20    1.38
  -7   5   3   14.85    1.55
   6  -5  -3   29.28    1.61
  -6  -5   3   24.27    1.34
  -6  -5   3   25.84    1.45
  -6   5   3   27.76    1.83
  -6   5   3   26.27    1.70
   6   5  -3   25.38    1.26
  -5  -5   3   24.58    1.39
  -5  -5   3   28.47    1.39
   5  -5  -3   29.78    1.58
  -5  -5   3   26.33    1.52
  -5   5   3   26.68    1.86
  -5   5   3   27.31    1.67
  -4  -5   3  108.96    5.68
  -4  -5   3  118.60    5.00
  -4  -5   3  111.45    5.02
   4  -5  -3  117.19    5.10
  -4  -5   3  106.46    5.66
   4   5  -3  112.59    5.00
  -4   5   3  108.82    5.14
  -3  -5   3   16.25    1.16
  -3  -5   3   16.83    1.09
  -3  -5   3   16.57    0.98
  -3  -5   3   17.06    1.00
   3  -5  -3   18.05    1.07
   3   5  -3   15.29    0.98
  -3   5   3   16.93    1.17
  -2  -5   3   82.03    4.20
   2  -5  -3   83.62    3.71
  -2  -5   3   86.50    3.73
  -2  -5   3   79.73    4.19
  -2  -5   3   88.17    3.70
   2   5  -3   83.03    4.18
  -2   5   3   76.00    3.73
   2   5  -3   81.29    3.70
   2   5  -3   73.17    3.69
  -1  -5   3  140.14    6.92
  -1  -5   3  135.16    6.08
   1  -5  -3  141.86    6.92
  -1  -5   3  137.83    6.11
   1  -5  -3  134.30    6.06
   1   5  -3  137.99    6.90
  -1   5   3  131.24    6.08
   1   5  -3  130.32    6.09
   1   5  -3  139.78    6.09
   0  -5  -3  120.99    5.96
   0  -5   3  111.73    5.31
   0  -5   3  116.14    6.01
   0  -5   3  112.78    5.28
   0  -5  -3  121.19    5.24
   0   5  -3  118.68    5.30
   0   5  -3  122.84    6.00
   0   5   3  120.97    5.26
   0   5  -3  114.44    5.30
  -1  -5  -3   24.89    1.37
  -1  -5  -3   23.73    1.16
   1  -5   3   21.31    1.51
   1  -5   3   21.83    1.33
   1  -5   3   22.93    1.39
  -1   5  -3   21.88    1.34
   1   5   3   22.32    1.17
  -1   5  -3   22.04    1.47
   2  -5   3   19.78    1.41
  -2  -5  -3   21.54    1.09
  -2  -5  -3   20.07    1.25
   2  -5   3   19.96    1.34
   2  -5   3   20.51    1.52
  -2   5  -3   21.11    1.44
   2   5   3   21.33    1.07
  -2   5  -3   20.13    1.39
   3  -5   3    0.38    0.60
  -3  -5  -3    0.30    0.29
   3  -5   3    0.32    0.54
   3  -5   3    0.41    0.66
  -3   5  -3    0.56    0.58
  -3   5  -3    0.53    0.63
   3   5   3    0.18    0.33
   3   5   3    0.90    0.23
   3   5   3    0.14    0.23
   4  -5   3    2.57    0.66
   4  -5   3    2.42    0.53
   4  -5   3    2.43    0.66
  -4   5  -3    2.33    0.59
  -4   5  -3    2.60    0.67
   4   5   3    2.37    0.40
   5  -5   3    0.71    0.68
   5  -5   3    0.27    0.54
   5  -5   3    0.81    0.52
  -5   5  -3    0.74    0.72
  -5   5  -3    0.86    0.56
   6  -5   3    4.64    0.77
   6  -5   3    4.41    0.62
   6  -5   3    3.97    0.93
  -6   5  -3    3.78    0.67
  -6   5  -3    5.68    1.02
   8  -6  -3    2.97    1.06
  -8  -6   3    5.57    0.67
  -8   6   3    7.39    1.20
  -8   6   3    5.60    1.27
   7  -6  -3    0.83    0.79
  -7  -6   3    2.31    0.49
  -7  -6   3    3.84    0.56
  -7   6   3    2.48    0.88
  -7   6   3    2.36    0.70
   6  -6  -3    8.20    1.28
   6  -6  -3    8.87    1.07
  -6  -6   3    8.63    0.69
  -6  -6   3    9.19    0.68
  -6   6   3    9.18    1.22
  -6   6   3    8.77    1.16
   5  -6  -3   18.43    1.25
  -5  -6   3   17.75    0.99
  -5  -6   3   17.21    0.99
  -5   6   3   16.61    1.44
  -5   6   3   15.82    1.31
  -4  -6   3    9.76    0.78
   4  -6  -3   10.59    1.03
  -4  -6   3    9.70    0.75
  -4  -6   3    8.98    0.82
  -4  -6   3    9.79    0.92
  -4   6   3   10.58    1.13
  -4   6   3    8.96    1.28
   4   6  -3    8.77    0.72
  -3  -6   3   24.30    1.48
   3  -6  -3   26.82    1.42
  -3  -6   3   25.80    1.33
  -3  -6   3   24.66    1.35
  -3  -6   3   25.95    1.53
  -3   6   3   23.59    1.47
   3   6  -3   23.38    1.32
   2  -6  -3   17.27    1.05
  -2  -6   3   15.11    1.11
  -2  -6   3   15.74    1.17
  -2  -6   3   16.54    0.99
  -2  -6   3   15.42    1.01
   2   6  -3   15.92    1.01
  -2   6   3   15.15    1.07
   2   6  -3   17.15    1.11
   2   6  -3   15.52    1.00
  -1  -6   3   55.83    3.07
  -1  -6   3   57.83    2.70
  -1  -6   3   56.86    2.73
   1  -6  -3   59.96    2.68
  -1   6   3   58.73    2.71
   1   6  -3   60.42    3.06
   1   6  -3   57.71    2.70
   1   6  -3   52.86    2.70
   0  -6  -3    0.69    0.62
   0  -6   3    0.29    0.52
   0  -6  -3    0.88    0.32
   0  -6   3    0.53    0.45
   0  -6   3    0.61    0.51
   0   6  -3    0.62    0.50
   0   6   3    1.09    0.39
   0   6  -3    0.62    0.46
   0   6  -3    0.31    0.46
   0   6   3   -0.31    0.58
  -1  -6  -3   50.13    2.51
   1  -6   3   44.97    2.37
  -1  -6  -3   49.12    2.18
   1  -6   3   46.42    2.34
   1  -6   3   45.40    2.66
   1   6   3   45.43    2.20
  -1   6  -3   46.03    2.34
  -1   6  -3   46.64    2.62
   2  -6   3   34.17    2.20
  -2  -6  -3   37.36    1.70
   2  -6   3   34.40    2.00
   2  -6   3   36.38    1.95
  -2  -6  -3   34.52    1.94
   2   6   3   35.76    1.70
  -2   6  -3   35.95    2.16
  -2   6  -3   35.18    1.96
   3  -6   3   15.98    1.22
  -3  -6  -3   16.52    0.88
   3  -6   3   14.74    1.40
   3  -6   3   14.45    1.32
   3   6   3   16.99    0.98
   3   6   3   15.63    0.76
  -3   6  -3   14.69    1.33
  -3   6  -3   16.98    1.39
   3   6   3   14.63    0.77
  -4  -6  -3   15.79    0.84
   4  -6   3   15.15    1.32
   4  -6   3   15.43    1.22
   4  -6   3   15.26    1.36
  -4   6  -3   17.75    1.35
   4   6   3   13.71    0.86
  -4   6  -3   18.65    1.39
   4   6   3   16.36    0.87
   5  -6   3   18.10    1.26
   5  -6   3   15.40    1.35
   5  -6   3   14.02    1.51
  -5   6  -3   17.32    1.36
  -5   6  -3   17.03    1.55
   6  -6   3    3.74    0.65
   6  -6   3    5.12    0.99
   6  -6   3    2.72    0.97
  -6   6  -3    3.28    0.71
  -6   6  -3    4.87    1.07
  -7  -7   3   10.91    0.76
   7  -7  -3    8.07    1.42
  -7  -7   3    9.24    0.86
  -7   7   3   10.33    1.58
  -7   7   3    9.76    1.25
  -6  -7   3   10.07    0.76
  -6  -7   3   10.66    0.75
  -6  -7   3   10.50    0.78
   6  -7  -3   11.30    1.20
  -6   7   3   11.02    1.28
  -6   7   3   11.51    1.32
  -5  -7   3    1.62    0.58
  -5  -7   3    2.61    0.37
   5  -7  -3    2.54    0.59
   5  -7  -3    0.66    0.89
  -5  -7   3    2.38    0.36
  -5   7   3    1.83    0.64
  -5   7   3    2.86    0.76
  -4  -7   3  105.39    4.68
  -4  -7   3  108.86    5.29
  -4  -7   3  105.19    4.65
  -4  -7   3   95.41    5.27
   4  -7  -3  109.53    4.80
  -4   7   3  101.28    5.48
  -4   7   3  100.68    4.84
  -3  -7   3   18.52    1.27
  -3  -7   3   17.66    1.12
  -3  -7   3   16.11    1.19
  -3  -7   3   19.06    1.08
   3  -7  -3   20.05    1.21
   3   7  -3   15.00    1.06
  -3   7   3   16.62    1.43
   3   7  -3   19.17    1.19
  -3   7   3   16.69    1.27
   2  -7  -3   27.33    1.43
  -2  -7   3   23.43    1.54
  -2  -7   3   25.48    1.42
  -2  -7   3   27.20    1.39
   2   7  -3   25.83    1.54
   2   7  -3   21.89    1.37
   2   7  -3   25.43    1.38
  -2   7   3   24.17    1.49
   1  -7  -3  102.15    4.64
  -1  -7   3  103.37    5.31
  -1  -7   3  104.74    4.67
  -1  -7   3  102.15    4.69
   1   7  -3  100.79    4.66
   1   7  -3  107.25    5.29
  -1   7   3   98.80    4.66
   0  -7  -3   56.98    3.26
   0  -7   3   62.27    2.97
   0  -7  -3   62.67    2.84
   0  -7   3   59.43    2.91
   0  -7   3   59.83    3.34
   0   7   3   62.15    2.88
   0   7  -3   62.95    3.30
   0   7  -3   64.01    2.94
  -1  -7  -3   10.30    0.94
   1  -7   3    8.57    1.16
   1  -7   3    9.06    1.10
   1  -7   3    8.26    1.03
  -1  -7  -3   10.38    0.73
  -1   7  -3    9.51    1.09
  -1   7  -3   10.00    1.07
   1   7   3    8.87    0.79
  -2  -7  -3   27.84    1.31
   2  -7   3   26.10    1.67
  -2  -7  -3   27.01    1.52
   2  -7   3   26.09    1.61
   2  -7   3   24.10    1.85
   2   7   3   24.35    1.32
  -2   7  -3   25.23    1.67
  -2   7  -3   25.29    1.73
   3  -7   3    0.37    0.63
  -3  -7  -3    0.06    0.26
   3  -7   3   -0.11    0.63
   3  -7   3    0.26    0.59
  -3   7  -3   -0.87    0.63
  -3   7  -3    0.15    0.61
   3   7   3    0.25    0.29
   3   7   3    0.13    0.34
   4  -7   3    3.68    0.75
   4  -7   3    3.58    0.75
  -4  -7  -3    4.77    0.43
   4  -7   3    4.01    0.68
  -4   7  -3    4.95    0.79
  -4   7  -3    3.76    0.79
   5  -7   3    0.33    0.82
   5  -7   3    1.35    0.59
   5  -7   3    1.42    0.56
  -5   7  -3    1.62    0.66
  -5   7  -3    1.23    0.84
   6  -7   3    0.14    1.05
   6  -7   3   -0.13    0.58
   6  -7   3   -0.06    0.54
  -6   7  -3    0.95    1.09
  -6   7  -3   -0.07    0.58
   7  -8  -3    6.01    1.06
  -7  -8   3    6.55    0.76
  -7  -8   3    8.30    0.70
  -7   8   3    9.60    1.60
  -7   8   3    6.59    1.17
   6  -8  -3   -0.24    0.66
  -6  -8   3    0.59    0.32
   6  -8  -3    0.22    0.81
  -6  -8   3    0.85    0.33
  -6  -8   3    0.36    0.35
  -6   8   3   -0.39    0.71
  -6   8   3    1.43    0.78
  -5  -8   3   10.14    0.77
   5  -8  -3   11.49    1.09
  -5  -8   3   10.46    0.78
  -5   8   3   10.39    1.33
  -5   8   3   10.53    1.14
  -4  -8   3    2.11    0.42
  -4  -8   3    3.01    0.54
  -4  -8   3    2.28    0.48
   4  -8  -3    3.24    0.64
   4  -8  -3    0.67    0.93
  -4   8   3    2.17    0.69
  -4   8   3    1.54    0.78
  -3  -8   3   25.22    1.31
  -3  -8   3   21.68    1.33
   3  -8  -3   24.24    1.42
  -3  -8   3   22.91    1.52
  -3  -8   3   21.34    1.46
  -3   8   3   21.69    1.75
  -3   8   3   21.91    1.56
   3   8  -3   24.95    1.31
   3   8  -3   23.52    1.44
  -2  -8   3  105.43    4.73
   2  -8  -3  107.68    4.77
  -2  -8   3  102.15    4.75
  -2  -8   3   99.40    5.37
   2   8  -3  110.90    5.36
  -2   8   3  101.08    4.80
   2   8  -3  106.78    4.73
  -2   8   3  100.27    5.44
   1  -8  -3   59.92    2.82
  -1  -8   3   57.97    2.85
  -1  -8   3   55.93    3.22
  -1  -8   3   58.21    2.91
   1   8  -3   62.10    3.23
   1   8  -3   63.17    2.88
  -1   8   3   59.58    2.87
   0  -8  -3   23.55    1.24
   0  -8   3   21.32    1.43
   0  -8   3   21.18    1.48
   0  -8   3   20.61    1.60
   0   8   3   21.70    1.32
   0   8  -3   21.35    1.36
   0   8  -3   20.87    1.50
   1  -8   3   44.37    2.67
  -1  -8  -3   47.51    2.15
   1  -8   3   41.98    2.38
   1  -8   3   44.52    2.36
  -1  -8  -3   48.15    2.49
  -1   8  -3   45.36    2.37
  -1   8  -3   44.93    2.60
   1   8   3   43.24    2.18
  -2  -8  -3   56.48    2.80
   2  -8   3   50.74    3.09
   2  -8   3   52.43    2.78
   2  -8   3   52.33    2.68
  -2  -8  -3   54.06    2.45
  -2   8  -3   52.53    3.01
   2   8   3   51.83    2.46
  -2   8  -3   52.57    2.73
   3  -8   3   12.23    1.18
   3  -8   3   11.01    1.25
  -3  -8  -3   10.40    0.67
   3  -8   3   11.23    1.27
   3   8   3    9.06    0.79
  -3   8  -3    9.19    1.12
  -3   8  -3    9.40    1.20
   3   8   3   11.48    0.74
  -4  -8  -3    5.10    0.44
   4  -8   3    6.09    1.05
   4  -8   3    4.50    0.81
   4  -8   3    4.83    0.86
  -4   8  -3    4.37    0.85
  -4   8  -3    7.10    1.14
   5  -8   3   22.09    1.68
   5  -8   3   19.96    1.87
   5  -8   3   23.43    1.59
  -5   8  -3   25.23    1.89
  -5   8  -3   24.30    1.73
   6  -8   3    0.41    1.18
   6  -8   3    1.81    0.64
  -6   8  -3    1.27    0.63
  -6   8  -3    1.74    1.20
  -7  -9   3    7.85    0.72
   7  -9  -3    7.84    1.21
  -7   9   3    7.39    1.25
  -7   9   3    7.93    1.20
  -6  -9   3    2.37    0.38
   6  -9  -3    1.37    0.73
   6  -9  -3   -0.02    0.89
  -6  -9   3    1.75    0.39
  -6   9   3    1.47    0.77
  -6   9   3    1.70    0.79
  -5  -9   3   41.11    1.89
  -5  -9   3   36.27    1.91
   5  -9  -3   42.35    2.15
  -5  -9   3   36.73    2.13
  -5   9   3   37.77    2.22
  -5   9   3   40.65    2.49
  -4  -9   3   33.94    2.11
  -4  -9   3   39.72    2.11
  -4  -9   3   37.68    1.89
   4  -9  -3   38.65    2.06
  -4  -9   3   39.25    1.87
  -4   9   3   36.40    2.37
  -4   9   3   40.00    2.16
  -3  -9   3   15.31    1.27
   3  -9  -3   17.35    1.20
  -3  -9   3   14.26    1.20
  -3  -9   3   14.77    1.11
  -3  -9   3   16.81    1.10
   3   9  -3   16.75    1.06
  -3   9   3   15.28    1.46
   3   9  -3   16.85    1.18
  -3   9   3   14.52    1.34
  -2  -9   3   96.80    4.59
  -2  -9   3   91.11    5.17
   2  -9  -3  101.98    4.59
  -2  -9   3  103.28    4.56
   2   9  -3  103.86    4.56
  -2   9   3   98.53    5.26
   2   9  -3  106.41    5.16
  -2   9   3   95.83    4.64
  -1  -9   3  280.43   14.94
  -1  -9   3  298.22   13.16
   1  -9  -3  305.46   13.15
  -1  -9   3  299.70   13.20
   1   9  -3  308.81   13.17
   1   9  -3  307.09   14.93
  -1   9   3  292.15   13.18
  -1   9   3  293.38   14.96
   0  -9   3   52.85    3.10
   0  -9   3   55.47    2.73
   0  -9   3   55.30    2.78
   0  -9  -3   57.97    2.60
   0   9  -3   54.13    3.02
   0   9   3   51.97    2.64
   0   9  -3   56.04    2.72
   0   9   3   50.09    3.00
   1  -9   3   24.63    1.65
  -1  -9  -3   24.13    1.63
   1  -9   3   24.61    1.83
   1  -9   3   26.29    1.72
  -1  -9  -3   26.48    1.36
   1   9   3   26.23    1.42
   1   9   3   23.58    1.63
  -1   9  -3   23.37    1.74
  -1   9  -3   25.02    1.64
   2  -9   3  112.79    5.23
  -2  -9  -3  117.62    5.70
  -2  -9  -3  117.64    5.02
   2  -9   3  109.71    5.28
   2  -9   3  107.96    5.94
  -2   9  -3  115.55    5.25
  -2   9  -3  114.11    5.91
   2   9   3  110.10    5.03
   2   9   3  106.63    5.74
  -3  -9  -3   12.56    0.75
   3  -9   3   11.84    1.25
   3  -9   3   12.22    1.34
   3  -9   3   12.78    1.27
  -3   9  -3   12.18    1.35
  -3   9  -3   10.93    1.30
  -4  -9  -3    3.56    0.40
   4  -9   3    3.50    0.82
   4  -9   3    4.63    0.76
   4  -9   3    3.73    0.86
  -4   9  -3    3.13    0.82
  -4   9  -3    2.76    0.82
   5  -9   3    0.50    0.62
   5  -9   3   -0.08    0.98
   5  -9   3    0.63    0.65
  -5   9  -3    1.17    0.75
  -5   9  -3    0.04    0.93
   7 -10  -3    4.82    1.23
  -7 -10   3    6.63    0.61
  -7 -10   3    6.35    0.64
  -7  10   3    6.31    1.28
  -7  10   3    6.83    1.30
   6 -10  -3    3.22    0.85
  -6 -10   3    4.15    0.67
  -6 -10   3    5.12    0.64
  -6  10   3    5.69    0.94
  -6  10   3    4.83    0.92
   5 -10  -3    7.54    1.09
  -5 -10   3    8.69    0.77
  -5 -10   3    7.94    0.84
  -5 -10   3    7.62    0.75
  -5  10   3    7.48    1.24
  -5  10   3    8.43    1.30
   4 -10  -3   34.87    1.92
  -4 -10   3   35.33    1.94
  -4 -10   3   33.18    1.75
  -4 -10   3   36.37    1.74
  -4 -10   3   32.23    1.99
  -4  10   3   33.40    2.23
  -4  10   3   33.55    2.02
  -3 -10   3    4.97    0.71
  -3 -10   3    4.20    0.57
   3 -10  -3    3.08    0.63
  -3 -10   3    3.35    0.63
  -3 -10   3    4.69    0.81
   3  10  -3    4.53    0.81
  -3  10   3    3.98    0.87
   3  10  -3    3.76    0.51
  -3  10   3    4.04    0.75
  -2 -10   3   19.22    1.55
   2 -10  -3   19.93    1.39
  -2 -10   3   20.59    1.40
  -2 -10   3   21.57    1.36
   2  10  -3   21.52    1.49
  -2  10   3   20.97    1.74
   2  10  -3   23.56    1.34
  -2  10   3   21.57    1.54
  -1 -10   3   64.50    3.12
  -1 -10   3   62.88    3.14
   1 -10  -3   66.50    3.05
  -1 -10   3   61.71    3.52
  -1  10   3   61.60    3.55
   1  10  -3   64.02    3.49
   1  10  -3   66.52    3.10
  -1  10   3   61.50    3.12
   0 -10   3   41.11    2.28
   0 -10   3   42.09    2.25
   0 -10   3   39.17    2.48
   0 -10  -3   43.18    2.08
   0  10  -3   41.58    2.20
   0  10   3   39.26    2.13
   0  10  -3   42.38    2.48
   0  10   3   39.17    2.43
   1 -10   3   96.66    4.77
   1 -10   3  100.58    5.39
  -1 -10  -3  105.92    4.57
   1 -10   3   99.12    4.71
   1  10   3   99.44    4.60
  -1  10  -3   99.58    4.72
   1  10   3   99.76    5.25
  -1  10  -3  105.44    5.36
  -2 -10  -3   24.54    1.28
  -2 -10  -3   25.35    1.51
   2 -10   3   23.90    1.84
   2 -10   3   26.43    1.67
   2 -10   3   22.01    1.62
   2  10   3   24.10    1.57
   2  10   3   23.97    1.30
  -2  10  -3   25.38    1.66
  -2  10  -3   24.36    1.78
   3 -10   3   21.05    1.78
  -3 -10  -3   22.39    1.34
   3 -10   3   23.09    1.67
  -3 -10  -3   24.19    1.20
   3 -10   3   25.71    1.68
  -3  10  -3   23.16    1.72
  -3  10  -3   23.84    1.75
  -4 -10  -3    7.02    0.50
   4 -10   3    8.97    1.49
   4 -10   3    6.69    1.25
   4 -10   3   10.33    1.31
  -4  10  -3    6.79    1.21
  -4  10  -3    7.09    1.01
   5 -10   3   11.44    1.31
   5 -10   3    7.48    1.19
   5 -10   3    5.57    1.19
  -5  10  -3    8.73    1.26
  -5  10  -3    8.00    1.28
  -6 -11   3    2.65    0.46
   6 -11  -3    2.45    0.96
  -6 -11   3    2.48    0.46
  -6  11   3    3.07    0.85
  -6  11   3    3.69    0.90
  -5 -11   3   10.10    0.84
  -5 -11   3    8.90    0.82
   5 -11  -3    8.39    1.19
  -5 -11   3    6.32    0.87
  -5  11   3    8.18    1.28
  -5  11   3    8.85    1.41
  -4 -11   3    3.37    0.62
  -4 -11   3    2.64    0.51
   4 -11  -3    1.71    0.63
  -4 -11   3    3.13    0.58
  -4 -11   3    4.61    0.72
  -4  11   3    2.86    0.85
  -4  11   3    3.46    0.76
  -3 -11   3   15.97    1.33
  -3 -11   3   15.88    1.26
  -3 -11   3   17.70    1.19
  -3 -11   3   18.65    1.17
   3 -11  -3   15.85    1.27
   3  11  -3   18.82    1.12
   3  11  -3   18.32    1.27
  -3  11   3   17.24    1.58
  -3  11   3   16.39    1.33
   2 -11  -3    3.36    0.62
  -2 -11   3    3.24    0.70
  -2 -11   3    3.84    0.64
  -2 -11   3    3.45    0.60
  -2  11   3    3.21    0.71
   2  11  -3    3.63    0.56
  -2  11   3    2.72    0.80
   2  11  -3    3.30    0.65
  -1 -11   3   17.96    1.34
   1 -11  -3   17.98    1.16
  -1 -11   3   16.01    1.44
  -1 -11   3   17.77    1.38
   1  11  -3   16.46    1.25
  -1  11   3   15.62    1.32
  -1  11   3   15.10    1.48
   1  11  -3   16.44    1.43
   0 -11   3   77.63    3.76
   0 -11   3   75.87    3.69
   0 -11  -3   80.84    3.61
   0 -11   3   76.32    4.24
   0  11  -3   79.59    4.19
   0  11   3   75.07    3.65
   0  11   3   77.73    4.17
   0  11  -3   74.70    3.71
   1 -11   3   12.73    1.30
  -1 -11  -3   13.69    0.93
   1 -11   3   12.39    1.37
   1 -11   3   13.04    1.29
  -1  11  -3   14.63    1.33
  -1  11  -3   13.66    1.27
   1  11   3   14.09    1.03
   1  11   3   13.44    1.25
   2 -11   3    0.62    0.71
   2 -11   3    0.40    0.65
  -2 -11  -3    0.34    0.63
   2 -11   3    1.31    0.73
  -2 -11  -3    0.16    0.34
   2  11   3    0.77    0.55
   2  11   3    0.35    0.36
  -2  11  -3    0.01    0.67
  -2  11  -3    0.89    0.77
   3 -11   3    1.41    0.77
  -3 -11  -3    0.88    0.34
   3 -11   3    1.96    0.77
  -3 -11  -3    1.76    0.47
   3 -11   3    2.31    0.74
  -3  11  -3    0.32    0.78
  -3  11  -3    0.62    0.78
   4 -11   3    1.75    0.96
   4 -11   3    2.53    0.72
  -4 -11  -3    1.89    0.28
   4 -11   3    2.84    0.77
  -4  11  -3    1.26    0.79
  -4  11  -3    2.52    0.89
   5 -11   3    0.75    0.72
   5 -11   3    0.33    1.18
  -5  11  -3    0.10    1.16
  -5  11  -3    1.47    0.82
   6 -12  -3    2.38    1.00
  -6 -12   3    3.15    0.51
  -6  12   3    5.72    1.03
  -6  12   3    3.31    0.86
   5 -12  -3    2.33    0.72
  -5 -12   3    3.29    0.52
  -5 -12   3    1.28    0.67
  -5 -12   3    2.63    0.53
  -5  12   3    3.05    0.79
  -5  12   3    3.29    0.90
  -4 -12   3    2.98    0.50
  -4 -12   3    1.94    0.65
   4 -12  -3    1.27    0.64
  -4 -12   3    1.71    0.57
  -4 -12   3    2.45    0.55
   4  12  -3    0.78    0.54
  -4  12   3    2.03    0.85
  -4  12   3    1.90    0.73
  -3 -12   3   16.92    1.21
  -3 -12   3   15.48    1.38
   3 -12  -3   15.94    1.29
  -3 -12   3   17.92    1.26
   3  12  -3   17.84    1.30
  -3  12   3   16.90    1.61
  -3  12   3   15.49    1.41
   3  12  -3   18.25    1.12
  -2 -12   3   10.74    1.19
  -2 -12   3    9.78    1.07
   2 -12  -3   10.59    1.05
  -2 -12   3    9.65    1.07
   2  12  -3   10.76    1.13
  -2  12   3    9.84    1.34
  -2  12   3    8.51    1.12
   2  12  -3   11.34    1.00
   1 -12  -3   23.02    1.42
  -1 -12   3   24.12    1.56
  -1 -12   3   23.11    1.54
  -1 -12   3   22.60    1.70
  -1  12   3   22.18    1.51
   1  12  -3   24.44    1.51
  -1  12   3   21.76    1.75
   1  12  -3   23.92    1.69
   0 -12   3    7.64    1.15
   0 -12   3    6.88    1.14
   0 -12   3    6.49    1.11
   0 -12  -3    8.33    0.86
   0  12  -3    7.07    1.20
   0  12  -3    8.18    1.10
   0  12   3    6.88    0.93
   0  12   3    7.62    1.16
  -1 -12  -3   12.03    0.88
   1 -12   3   11.47    1.30
   1 -12   3    9.48    1.18
   1 -12   3   11.99    1.36
  -1  12  -3    9.00    1.20
   1  12   3    9.69    0.95
   1  12   3   10.80    1.22
  -1  12  -3    9.02    1.23
  -2 -12  -3   16.79    1.43
   2 -12   3   19.09    1.60
  -2 -12  -3   20.52    1.14
   2 -12   3   21.14    1.58
   2 -12   3   19.11    1.56
  -2  12  -3   19.16    1.71
   2  12   3   18.27    1.14
   2  12   3   18.35    1.47
  -2  12  -3   19.87    1.57
  -3 -12  -3   -0.36    0.33
  -3 -12  -3    0.14    0.52
   3 -12   3    0.86    0.76
   3 -12   3    0.34    0.67
   3 -12   3    0.67    0.76
  -3  12  -3    0.04    0.75
  -3  12  -3   -0.10    0.80
   4 -12   3    1.23    0.71
   4 -12   3    2.07    0.80
   4 -12   3   -0.25    1.01
  -4 -12  -3    0.86    0.30
  -4  12  -3    0.72    0.80
  -4  12  -3    1.48    0.89
  -6 -13   3    3.46    0.64
   6 -13  -3    1.09    1.08
  -6  13   3    3.92    0.98
  -6  13   3    7.12    1.39
  -5 -13   3   14.75    1.12
   5 -13  -3   12.62    1.31
  -5 -13   3   11.62    1.06
  -5  13   3   14.34    1.57
  -5  13   3   12.87    1.37
  -4 -13   3   10.35    1.27
  -4 -13   3   11.85    1.02
   4 -13  -3    7.72    1.13
  -4 -13   3    9.26    1.05
  -4 -13   3   10.38    1.11
   4  13  -3    9.50    1.09
  -4  13   3    9.80    1.25
  -4  13   3   10.93    1.47
  -3 -13   3    2.04    0.63
   3 -13  -3    1.49    0.64
  -3 -13   3    2.42    0.77
  -3 -13   3    2.62    0.55
  -3  13   3    3.11    0.91
   3  13  -3    2.08    0.49
  -3  13   3    2.76    0.75
   3  13  -3    2.77    0.67
  -2 -13   3    1.90    0.75
   2 -13  -3    1.99    0.61
  -2 -13   3    1.87    0.60
  -2 -13   3    1.98    0.65
   2  13  -3    2.07    0.54
   2  13  -3    2.01    0.68
  -2  13   3    2.54    0.87
  -2  13   3    1.61    0.65
  -1 -13   3   28.57    2.01
   1 -13  -3   27.83    1.66
  -1 -13   3   28.57    1.77
  -1 -13   3   28.86    1.80
   1  13  -3   28.61    1.74
  -1  13   3   29.39    2.05
   1  13  -3   29.09    1.95
  -1  13   3   28.06    1.74
   0 -13  -3   12.44    1.02
   0 -13   3   13.03    1.30
   0 -13   3   11.54    1.30
   0 -13   3   11.25    1.34
   0  13  -3   11.43    1.39
   0  13   3   11.68    1.11
   0  13   3   11.52    1.38
   0  13  -3   12.34    1.25
   1 -13   3    5.83    0.96
  -1 -13  -3    5.75    0.78
   1 -13   3    6.58    1.10
   1 -13   3    5.86    0.89
   1  13   3    4.35    0.87
  -1  13  -3    3.60    0.81
   1  13   3    4.57    0.63
  -1  13  -3    5.06    0.93
  -2 -13  -3   24.42    1.33
   2 -13   3   26.63    1.78
   2 -13   3   23.98    1.74
   2 -13   3   23.10    1.87
  -2  13  -3   24.08    1.76
   2  13   3   22.54    1.71
  -2  13  -3   22.96    1.91
   2  13   3   20.08    1.34
  -3 -13  -3    0.28    0.38
   3 -13   3    1.05    0.77
   3 -13   3    1.43    0.75
  -3 -13  -3    0.83    0.60
   3 -13   3    1.21    0.72
  -3  13  -3   -0.83    0.73
  -3  13  -3    0.12    0.77
   4 -13   3    0.51    1.12
  -4 -13  -3   -0.02    0.34
   4 -13   3    2.17    0.82
  -4  13  -3   -0.08    0.91
  -4  13  -3   -0.39    0.79
  -5 -14   3    2.95    0.67
   5 -14  -3    0.80    0.78
  -5 -14   3    3.39    0.65
  -5 -14   3    2.25    0.65
  -5  14   3    2.60    0.86
  -5  14   3    3.90    0.87
  -4 -14   3    1.07    0.66
  -4 -14   3    1.80    0.51
  -4 -14   3    1.09    0.62
  -4 -14   3    1.77    0.79
  -4  14   3    1.85    0.69
   4  14  -3    0.72    0.64
  -4  14   3    2.64    0.89
  -3 -14   3    0.38    0.77
  -3 -14   3    0.71    0.47
  -3 -14   3    0.73    0.69
   3 -14  -3   -0.98    0.54
   3 -14  -3   -0.78    0.94
   3  14  -3    0.22    0.69
   3  14  -3    0.18    0.48
  -3  14   3    0.96    0.88
  -3  14   3    0.04    0.65
  -2 -14   3    1.62    0.75
   2 -14  -3    1.10    0.61
  -2 -14   3    1.61    0.82
  -2 -14   3    2.28    0.57
  -2  14   3    0.99    0.67
   2  14  -3    1.93    0.76
   2  14  -3    1.79    0.56
  -2  14   3    2.44    0.91
  -1 -14   3   20.72    1.80
  -1 -14   3   18.63    1.45
  -1 -14   3   21.10    1.56
   1 -14  -3   18.22    1.36
  -1  14   3   20.34    1.83
   1  14  -3   20.48    1.67
   1  14  -3   20.71    1.47
  -1  14   3   19.89    1.46
   0 -14   3    3.08    0.72
   0 -14  -3    2.16    0.58
   0 -14   3    2.13    0.77
   0 -14   3    2.68    0.86
   0  14  -3    2.99    0.86
   0  14   3    2.93    0.91
   0  14   3    2.22    0.63
   0  14  -3    2.25    0.70
  -1 -14  -3   20.90    1.29
   1 -14   3   23.98    1.72
   1 -14   3   19.39    1.56
   1 -14   3   18.96    1.81
  -1  14  -3   18.73    1.75
   1  14   3   19.73    1.35
  -1  14  -3   19.79    1.62
   1  14   3   19.81    1.76
  -2 -14  -3    6.32    0.85
   2 -14   3    8.51    1.34
   2 -14   3   10.21    1.30
   2 -14   3   10.18    1.41
  -2  14  -3    6.88    0.96
  -2  14  -3    8.58    1.42
   2  14   3    8.07    1.33
   2  14   3    8.54    0.94
   3 -14   3    0.30    0.81
   3 -14   3    1.49    0.77
   3 -14   3   -0.38    0.66
  -3 -14  -3   -0.44    0.71
  -3  14  -3   -0.40    0.78
  -3  14  -3   -1.31    0.78
  -4 -15   3    3.32    0.95
  -4 -15   3    3.84    0.74
  -4 -15   3    3.17    0.61
   4 -15  -3    1.19    0.69
  -4 -15   3    2.30    0.77
   4  15  -3    2.89    0.81
  -4  15   3    3.51    0.99
  -4  15   3    2.16    0.71
  -3 -15   3    0.64    0.77
  -3 -15   3    1.07    0.91
   3 -15  -3   -1.75    0.93
  -3 -15   3   -0.18    0.46
  -3  15   3    1.04    0.92
  -3  15   3    0.56    0.68
   3  15  -3    0.13    0.73
   3  15  -3    0.40    0.49
  -2 -15   3    0.37    0.50
  -2 -15   3    0.43    0.80
  -2 -15   3    1.44    0.90
   2 -15  -3   -0.12    0.58
  -2  15   3    1.14    0.93
   2  15  -3    1.38    0.54
   2  15  -3    0.36    0.81
  -2  15   3    0.70    0.67
  -1 -15   3   45.38    2.51
  -1 -15   3   44.57    2.98
  -1 -15   3   50.35    2.64
   1 -15  -3   43.79    2.43
  -1  15   3   46.83    2.52
   1  15  -3   49.78    2.93
   1  15  -3   47.85    2.50
  -1  15   3   46.69    3.03
   0 -15  -3    5.92    0.87
   0 -15   3    5.79    0.94
   0 -15   3    5.89    0.85
   0 -15   3    5.64    1.07
   0  15   3    5.60    0.97
   0  15   3    6.19    1.12
   0  15  -3    5.02    1.00
   0  15  -3    7.29    1.15
   1 -15   3    1.55    0.81
   1 -15   3    1.68    0.69
   1 -15   3    1.71    0.89
  -1 -15  -3   -1.02    0.97
  -1 -15  -3    0.58    0.48
   1  15   3    1.88    0.93
  -1  15  -3    0.22    0.68
  -1  15  -3    0.83    0.90
   1  15   3    1.38    0.55
   2 -15   3   18.45    1.54
  -2 -15  -3   15.30    1.21
   2 -15   3   18.79    1.66
   2 -15   3   21.41    1.74
  -2  15  -3   15.65    1.57
  -2  15  -3   15.49    1.66
   2  15   3   18.50    1.29
   2  15   3   18.00    1.75
   3 -15   3    4.36    0.89
  -3 -15  -3    1.97    0.57
   3 -15   3    2.61    1.02
  -3  15  -3    2.51    0.92
  -3  15  -3    1.90    0.90
  -4 -16   3    7.76    1.23
  -4 -16   3    9.28    1.25
  -4  16   3    8.15    1.33
  -4  16   3    7.37    1.16
  -3 -16   3    0.64    0.88
  -3 -16   3    0.33    0.51
  -3 -16   3    0.49    0.99
   3  16  -3   -0.35    0.84
  -3  16   3   -0.28    0.95
  -3  16   3    0.19    0.70
   3  16  -3   -0.03    0.52
  -2 -16   3   12.73    1.62
  -2 -16   3    9.75    1.76
  -2 -16   3    9.24    1.07
   2 -16  -3    8.99    1.13
  -2  16   3   12.12    1.82
   2  16  -3   10.79    1.12
   2  16  -3   10.85    1.60
  -2  16   3   11.08    1.22
  -1 -16   3    5.96    1.17
  -1 -16   3    5.59    0.80
  -1 -16   3    6.60    1.06
  -1  16   3    5.43    1.20
  -1  16   3    4.32    0.74
   1  16  -3    4.03    0.79
   1  16  -3    6.01    1.18
   0 -16   3    3.72    1.00
   0 -16  -3    3.38    0.61
   0 -16   3    4.04    1.10
   0 -16   3    3.60    0.78
   0  16   3    3.05    0.68
   0  16   3    2.81    1.11
   0  16  -3    5.05    1.07
   0  16  -3    3.48    0.76
   1 -16   3   18.93    1.52
   1 -16   3   22.14    1.84
   1 -16   3   19.15    1.95
  -1 -16  -3   17.55    1.29
  -1  16  -3   17.44    1.84
   1  16   3   19.38    2.02
  -1  16  -3   20.37    1.65
   1  16   3   19.46    1.41
   2 -16   3   18.42    1.91
   2 -16   3   18.23    1.67
   2 -16   3   18.77    1.68
   2  16   3   15.49    1.95
  -2  16  -3   16.03    1.85
   2  16   3   18.25    1.39
  -2  16  -3   16.42    1.51
  -3 -17   3    2.05    1.08
   3  17  -3    0.37    1.02
   3  17  -3    0.19    0.61
  -3  17   3    2.65    1.24
  -3  17   3    0.16    0.73
  -2 -17   3    1.19    1.22
  -2 -17   3    0.06    1.02
   2 -17  -3   -2.21    1.38
  -2  17   3    0.03    0.64
  -2  17   3    0.58    1.26
   2  17  -3    1.26    0.62
   2  17  -3    0.51    1.09
  -1 -17   3   12.65    2.05
  -1 -17   3   13.58    1.81
  -1  17   3   12.20    2.10
   1  17  -3   14.74    1.92
   1  17  -3   12.95    1.31
  -1  17   3   11.51    1.20
   0 -17   3    7.81    1.44
   0 -17   3   10.51    1.71
   0 -17  -3    5.89    1.01
   0  17   3    7.82    1.38
   0  17  -3    8.12    1.21
   0  17  -3   10.05    1.88
   0  17   3    7.15    1.07
   1 -17   3    5.38    1.35
   1 -17   3    5.32    1.13
   1  17   3    4.31    1.33
   1  17   3    4.63    0.78
  -1  17  -3    4.97    1.27
   8   0  -4   19.60    1.38
  -8   0   4   19.25    1.76
   8   0  -4   19.82    1.53
  -8   0   4   21.62    1.61
   7   0  -4    0.09    0.45
  -7   0   4   -0.31    0.55
  -7   0   4    0.14    0.62
   7   0  -4    0.30    0.58
  -6   0   4   -0.01    0.49
   6   0  -4   -0.47    0.41
   6   0  -4   -0.30    0.56
  -6   0   4   -0.59    0.62
   5   0  -4   11.12    0.94
   5   0  -4   12.39    1.23
  -5   0   4   12.00    1.02
   4   0  -4   27.23    1.46
   4   0  -4   27.32    1.74
  -4   0   4   26.06    1.49
   3   0  -4    5.39    0.90
  -3   0   4    5.15    1.02
   3   0  -4    5.72    0.71
  -3   0   4    6.06    0.72
  -2   0   4   82.49    3.91
   2   0  -4   84.75    3.92
  -2   0   4   88.59    4.49
   2   0  -4   90.02    4.48
  -1   0   4   49.58    2.55
  -1   0   4   46.34    2.23
   1   0  -4   44.52    2.55
  -1   0   4   49.44    2.60
  -1   0   4   46.58    2.24
   1   0  -4   46.15    2.25
   0   0   4    2.85    0.46
   0   0  -4    2.29    0.43
   0   0   4    2.40    0.59
   0   0   4    3.07    0.53
   0   0   4    3.43    0.68
  -1   0  -4   42.66    2.12
   1   0   4   42.60    2.38
   1   0   4   44.33    2.42
   1   0   4   41.03    2.12
  -1   0  -4   46.36    2.14
   1   0   4   43.17    2.07
  -2   0  -4   10.41    0.94
  -2   0  -4   10.32    0.93
   2   0   4   10.98    1.05
   2   0   4    9.04    0.93
   2   0   4   11.48    0.82
   2   0   4    9.07    1.00
   3   0   4   34.12    1.97
  -3   0  -4   36.70    1.77
   3   0   4   32.51    1.98
   3   0   4   33.39    1.80
   3   0   4   35.31    1.68
  -3   0  -4   30.64    1.77
   4   0   4   14.37    0.86
   4   0   4   13.23    1.09
  -4   0  -4   13.33    1.02
   4   0   4   14.21    1.15
   4   0   4   13.07    1.08
  -5   0  -4    0.58    0.53
   5   0   4    1.22    0.33
   5   0   4    1.00    0.61
   5   0   4    1.38    0.53
  -6   0  -4    7.53    1.15
   6   0   4    9.41    1.20
   6   0   4    7.35    0.72
   6   0   4    7.30    1.03
  -8  -1   4   14.98    1.36
  -8  -1   4   12.49    1.54
   8  -1  -4   12.58    1.23
   8  -1  -4   11.47    1.39
  -8   1   4   12.35    1.63
  -8   1   4   14.12    1.37
   8   1  -4   13.22    1.27
   7  -1  -4    0.14    0.84
  -7  -1   4    0.69    0.63
   7  -1  -4    1.31    0.54
  -7  -1   4    1.35    0.59
   7   1  -4    1.00    0.47
  -7   1   4    0.91    0.61
   7   1  -4    1.72    0.58
  -7   1   4    0.98    0.68
  -6  -1   4    0.79    0.52
   6  -1  -4    1.37    0.48
   6  -1  -4    1.57    0.65
  -6  -1   4    2.47    0.69
   6   1  -4    1.36    0.57
   6   1  -4    1.42    0.44
  -6   1   4    0.67    0.53
   5  -1  -4    0.64    0.74
   5  -1  -4    0.42    0.46
  -5  -1   4    0.62    0.50
   5   1  -4    0.49    0.43
  -5   1   4    0.45    0.87
   5   1  -4    0.88    0.63
  -5   1   4    0.43    0.53
   4  -1  -4   35.18    2.01
   4  -1  -4   33.22    1.70
  -4  -1   4   32.64    1.68
  -4  -1   4   27.70    2.05
  -4   1   4   31.88    1.72
   4   1  -4   32.57    1.68
   4   1  -4   33.60    1.97
  -3  -1   4   10.96    1.12
   3  -1  -4   10.14    0.80
   3  -1  -4   12.56    1.01
  -3  -1   4   11.26    0.85
   3   1  -4   10.95    1.03
   3   1  -4   10.52    0.84
  -3   1   4    7.94    1.17
  -3   1   4   10.87    0.85
  -2  -1   4   84.53    4.43
   2  -1  -4   87.62    4.46
  -2  -1   4   94.03    4.47
  -2  -1   4   86.70    3.91
  -2  -1   4   84.25    3.92
   2  -1  -4   83.80    3.90
   2   1  -4   80.17    4.44
  -2   1   4   82.05    3.91
  -2   1   4   95.75    4.50
   2   1  -4   83.14    3.91
  -1  -1   4    8.84    0.80
  -1  -1   4    9.14    0.99
  -1  -1   4    8.57    0.86
   1  -1  -4    7.68    0.95
  -1  -1   4    8.82    0.76
   1  -1  -4    8.53    0.75
  -1   1   4    9.75    0.77
  -1   1   4   10.89    0.95
   1   1  -4    7.78    0.78
  -1   1   4    9.19    0.74
   1   1  -4    7.05    0.94
   0  -1   4   12.11    1.06
   0  -1   4   12.93    0.98
   0  -1  -4   12.38    0.86
   0  -1   4   12.70    0.82
   0  -1   4   11.84    0.91
   0  -1  -4   10.94    1.01
   0   1   4   13.13    0.97
   0   1   4   12.14    1.06
   0   1   4   11.95    0.83
   0   1  -4   10.91    0.90
   0   1  -4   11.89    0.90
   0   1   4   11.17    0.87
  -1  -1  -4   10.26    0.82
   1  -1   4    9.23    0.94
   1  -1   4   10.16    0.78
   1  -1   4    8.54    0.86
   1  -1   4   10.31    1.03
  -1   1  -4    9.69    0.87
  -1   1  -4    8.70    0.87
   1   1   4   11.53    1.00
   1   1   4    9.23    0.88
   1   1   4    9.95    0.82
   1   1   4    9.84    0.74
   2  -1   4   10.53    1.08
   2  -1   4   12.01    1.17
  -2  -1  -4   12.34    0.94
  -2  -1  -4   10.53    0.94
   2  -1   4   13.19    0.90
   2  -1   4   10.36    1.01
   2   1   4    9.85    0.93
  -2   1  -4   12.14    1.04
   2   1   4   12.47    1.09
   2   1   4   10.60    1.00
   2   1   4   12.41    0.81
  -2   1  -4   11.52    1.00
  -2   1  -4    9.20    1.00
  -3  -1  -4   24.08    1.32
   3  -1   4   20.68    1.39
   3  -1   4   23.14    1.57
  -3  -1  -4   19.65    1.31
   3  -1   4   23.94    1.27
   3  -1   4   21.14    1.52
  -3   1  -4   24.34    1.48
  -3   1  -4   23.95    1.37
   3   1   4   24.40    1.20
   3   1   4   23.90    1.47
   3   1   4   21.99    1.45
  -3   1  -4   20.11    1.36
   3   1   4   21.51    1.33
   4  -1   4    3.46    0.69
   4  -1   4    2.67    0.41
   4  -1   4    2.14    0.56
  -4  -1  -4    2.26    0.48
   4  -1   4    3.36    0.60
   4   1   4    2.99    0.62
   4   1   4    3.04    0.53
   4   1   4    2.63    0.49
  -4   1  -4    2.73    0.55
   4   1   4    2.66    0.35
   5  -1   4   26.93    1.37
   5  -1   4   25.86    1.78
  -5  -1  -4   27.65    1.50
   5  -1   4   23.33    1.60
   5  -1   4   25.66    1.69
   5   1   4   26.00    1.50
   5   1   4   26.42    1.30
  -5   1  -4   25.80    1.58
   5   1   4   24.72    1.62
   6  -1   4    0.61    0.40
   6  -1   4    0.88    0.69
   6  -1   4    0.85    0.81
   6   1   4    0.62    0.60
   6   1   4   -0.03    0.74
   6   1   4    0.45    0.34
  -6   1  -4    0.42    0.68
   6   1   4    0.14    0.27
   8  -2  -4    9.06    1.44
  -8  -2   4   11.47    1.48
   8  -2  -4   11.95    1.29
  -8  -2   4   13.65    1.27
   8   2  -4   11.08    1.22
   8   2  -4   11.13    0.95
  -8   2   4   11.82    1.69
  -8   2   4   13.33    1.32
  -7  -2   4    0.51    0.61
  -7  -2   4    1.01    0.48
  -7  -2   4    0.25    0.56
   7  -2  -4    0.63    0.55
   7  -2  -4   -0.93    0.86
   7   2  -4    0.16    0.42
  -7   2   4    0.58    0.73
   7   2  -4    0.60    0.49
  -7   2   4    0.63    0.62
   6  -2  -4    6.15    0.85
   6  -2  -4    5.21    1.04
  -6  -2   4    5.59    0.84
   6   2  -4    5.49    0.88
   6   2  -4    5.67    0.73
  -6   2   4    5.80    0.76
   5  -2  -4   22.60    1.72
  -5  -2   4   23.76    1.37
   5  -2  -4   26.54    1.42
   5   2  -4   24.22    1.60
  -5   2   4   22.65    1.49
   5   2  -4   23.96    1.34
   4  -2  -4   50.70    2.31
  -4  -2   4   47.34    2.27
  -4  -2   4   39.19    2.63
   4  -2  -4   50.14    2.71
  -4   2   4   48.34    2.35
   4   2  -4   46.85    2.27
   4   2  -4   46.84    2.63
  -3  -2   4    8.93    0.82
  -3  -2   4    9.49    0.78
   3  -2  -4    9.68    0.80
  -3  -2   4    8.47    0.87
   3  -2  -4   11.41    1.00
  -3  -2   4   11.33    1.08
   3   2  -4    7.99    1.00
  -3   2   4   10.67    0.84
   3   2  -4    8.87    0.80
  -2  -2   4   83.21    3.78
   2  -2  -4   86.41    4.30
  -2  -2   4   85.73    4.30
  -2  -2   4   82.12    4.27
  -2  -2   4   79.91    3.74
   2  -2  -4   82.19    3.76
   2   2  -4   79.93    3.76
   2   2  -4   76.81    4.27
  -2   2   4   81.41    3.77
  -2   2   4   87.59    4.35
   1  -2  -4  210.28   10.69
  -1  -2   4  205.72   10.70
   1  -2  -4  208.36    9.41
  -1  -2   4  205.82    9.41
  -1  -2   4  232.27   10.73
  -1  -2   4  210.74    9.44
   1   2  -4  210.64    9.44
  -1   2   4  197.01    9.41
  -1   2   4  240.98   10.73
   0  -2   4   50.51    2.82
   0  -2  -4   53.40    2.47
   0  -2  -4   50.14    2.81
   0  -2   4   51.21    2.83
   0  -2   4   50.83    2.51
   0  -2   4   52.89    2.48
   0   2  -4   52.03    2.51
   0   2   4   50.77    2.44
   0   2   4   52.93    2.47
   0   2   4   57.53    2.84
   0   2  -4   54.61    2.52
   1  -2   4   24.10    1.47
   1  -2   4   25.79    1.67
  -1  -2  -4   26.34    1.38
   1  -2   4   26.99    1.41
   1  -2   4   24.32    1.61
   1   2   4   28.87    1.65
  -1   2  -4   24.41    1.48
   1   2   4   26.57    1.56
   1   2   4   25.99    1.34
  -1   2  -4   27.48    1.49
  -1   2  -4   27.40    1.62
   1   2   4   25.09    1.38
   2  -2   4   33.56    1.69
   2  -2   4   29.38    1.78
   2  -2   4   31.16    1.98
   2  -2   4   32.24    1.99
  -2  -2  -4   33.18    1.68
   2   2   4   31.67    1.67
   2   2   4   32.68    1.60
   2   2   4   34.81    1.93
   2   2   4   32.39    1.88
  -2   2  -4   35.08    1.94
  -2   2  -4   33.15    1.77
  -2   2  -4   30.74    1.78
   3  -2   4   26.24    1.43
   3  -2   4   23.65    1.68
  -3  -2  -4   22.24    1.41
   3  -2   4   25.65    1.57
  -3   2  -4   27.69    1.53
  -3   2  -4   27.36    1.63
   3   2   4   28.75    1.62
   3   2   4   25.44    1.42
   3   2   4   26.78    1.32
   3   2   4   25.84    1.58
   4  -2   4    2.52    0.71
   4  -2   4    2.04    0.54
   4  -2   4    2.20    0.43
   4  -2   4    1.67    0.60
   4   2   4    2.05    0.31
  -4   2  -4    2.36    0.57
   4   2   4    1.74    0.45
  -4   2  -4    0.97    0.47
   4   2   4    3.30    0.60
   5  -2   4    5.57    0.96
   5  -2   4    5.82    0.73
   5  -2   4    5.37    0.77
   5  -2   4    7.04    1.16
   5   2   4    5.09    0.52
  -5   2  -4    4.98    0.86
   5   2   4    6.67    0.84
  -5   2  -4    6.97    1.08
   5   2   4    5.80    0.68
   6  -2   4    6.83    1.09
   6  -2   4    5.80    0.96
   6  -2   4    7.54    1.26
   6  -2   4    6.53    0.83
  -6   2  -4    5.88    0.88
  -8  -3   4    3.33    0.82
  -8  -3   4    5.81    1.04
  -8  -3   4    3.26    0.59
   8  -3  -4    2.56    0.80
  -8  -3   4    3.31    0.55
   8  -3  -4    1.54    1.03
  -8   3   4    3.51    1.03
   8   3  -4    4.40    0.70
  -8   3   4    3.67    0.76
  -7  -3   4    0.38    0.38
  -7  -3   4    0.43    0.42
   7  -3  -4    0.14    0.60
  -7  -3   4    0.26    0.54
  -7  -3   4    0.67    0.57
  -7   3   4    0.56    0.59
   7   3  -4   -0.07    0.48
  -7   3   4    0.67    0.73
   6  -3  -4   19.40    1.24
  -6  -3   4   16.81    1.12
  -6  -3   4   16.35    1.14
   6  -3  -4   16.19    1.41
   6   3  -4   16.40    1.22
  -6   3   4   15.68    1.42
   6   3  -4   15.82    1.02
  -6   3   4   16.92    1.33
  -5  -3   4    0.70    0.42
  -5  -3   4    1.44    0.41
   5  -3  -4    1.72    0.89
  -5  -3   4    1.02    0.41
   5  -3  -4    1.02    0.52
   5   3  -4    0.67    0.39
  -5   3   4    1.17    0.58
  -5   3   4   -0.39    0.74
   5   3  -4    0.80    0.56
  -4  -3   4   15.68    1.13
  -4  -3   4   16.12    1.35
  -4  -3   4   16.65    1.04
  -4  -3   4   17.12    1.07
   4  -3  -4   15.35    1.43
   4  -3  -4   15.77    1.10
   4   3  -4   13.65    1.25
  -4   3   4   15.51    1.14
   4   3  -4   13.64    1.02
  -3  -3   4   23.11    1.29
   3  -3  -4   24.98    1.32
  -3  -3   4   24.12    1.34
  -3  -3   4   24.87    1.57
  -3  -3   4   21.98    1.45
   3  -3  -4   27.17    1.63
  -3   3   4   24.32    1.37
   3   3  -4   22.13    1.53
   3   3  -4   23.12    1.31
  -2  -3   4   41.14    2.26
  -2  -3   4   39.79    2.24
  -2  -3   4   41.27    2.00
  -2  -3   4   42.05    1.96
   2  -3  -4   41.40    1.96
   2  -3  -4   42.15    2.29
  -2   3   4   41.60    1.99
  -2   3   4   33.25    2.30
   2   3  -4   38.06    1.97
   1  -3  -4   44.84    2.33
  -1  -3   4   41.44    2.01
  -1  -3   4   41.03    2.34
  -1  -3   4   42.01    2.07
   1  -3  -4   41.17    1.99
  -1  -3   4   38.95    2.29
   1   3  -4   40.62    2.04
  -1   3   4   42.44    2.00
   1   3  -4   39.63    2.06
   0  -3   4   80.30    3.95
   0  -3  -4   85.08    3.88
   0  -3   4   82.35    4.46
   0  -3   4   85.83    3.91
   0  -3   4   83.21    4.46
   0  -3  -4   86.76    4.42
   0   3  -4   84.34    3.95
   0   3  -4   89.21    3.93
   0   3  -4   92.80    4.45
   0   3   4   87.55    3.89
   0   3   4   85.20    3.88
  -1  -3  -4   42.97    2.49
  -1  -3  -4   46.32    2.19
   1  -3   4   46.25    2.22
   1  -3   4   46.47    2.60
   1  -3   4   44.27    2.30
   1  -3   4   43.70    2.55
   1   3   4   43.20    2.16
  -1   3  -4   47.09    2.29
  -1   3  -4   47.26    2.54
  -1   3  -4   43.85    2.31
   1   3   4   50.51    2.56
   1   3   4   49.36    2.49
   1   3   4   46.00    2.20
   2  -3   4   60.80    3.29
   2  -3   4   55.83    2.91
  -2  -3  -4   62.38    2.79
   2  -3   4   62.56    2.85
   2   3   4   62.10    3.19
  -2   3  -4   63.29    2.91
   2   3   4   61.45    3.16
   2   3   4   55.95    2.74
  -2   3  -4   54.56    2.90
  -2   3  -4   61.57    3.23
   2   3   4   57.75    2.79
   3  -3   4   36.01    1.81
   3  -3   4   33.00    2.11
   3  -3   4   34.60    1.93
  -3  -3  -4   33.30    1.74
   3   3   4   34.92    1.99
   3   3   4   35.50    1.96
  -3   3  -4   36.98    2.05
  -3   3  -4   36.41    1.88
   3   3   4   31.67    1.65
   4  -3   4   16.17    1.34
   4  -3   4   18.22    1.12
   4  -3   4   14.62    1.28
   4   3   4   16.16    1.00
   4   3   4   15.32    1.11
  -4   3  -4   17.92    1.25
  -4   3  -4   16.82    1.26
   4   3   4   16.17    0.88
   5  -3   4   25.51    1.86
   5  -3   4   27.95    2.00
   5  -3   4   30.29    1.58
   5  -3   4   26.78    1.89
  -5   3  -4   33.00    1.83
  -5   3  -4   32.36    1.82
   5   3   4   28.82    1.70
   6  -3   4    9.62    1.32
   6  -3   4    8.93    1.56
   6  -3   4    7.89    0.92
  -6   3  -4    7.67    1.06
  -6   3  -4   11.18    1.47
   8  -4  -4    6.11    0.98
  -8  -4   4   10.93    1.06
  -8  -4   4    9.08    0.86
  -8  -4   4    8.29    0.96
  -8   4   4   11.27    1.27
  -8   4   4    7.40    1.20
   7  -4  -4    5.92    0.80
  -7  -4   4    6.07    0.72
  -7  -4   4    5.74    0.95
  -7   4   4    6.88    1.08
   7   4  -4    6.39    0.77
  -7   4   4    5.21    0.90
  -6  -4   4    0.76    0.39
  -6  -4   4    0.65    0.46
   6  -4  -4    0.60    0.56
  -6  -4   4    1.32    0.38
  -6  -4   4    2.33    0.70
  -6   4   4   -0.41    0.65
  -6   4   4    0.88    0.64
   6   4  -4    1.17    0.37
   5  -4  -4    8.38    1.29
  -5  -4   4    8.81    0.86
   5  -4  -4   11.38    1.00
  -5  -4   4   11.37    0.86
  -5  -4   4   11.42    0.84
   5   4  -4    7.92    0.97
  -5   4   4   10.06    1.07
   5   4  -4    9.59    0.79
  -4  -4   4   28.46    1.80
   4  -4  -4   29.94    2.05
   4  -4  -4   33.83    1.71
  -4  -4   4   33.66    1.63
  -4  -4   4   28.83    1.88
  -4  -4   4   33.49    1.66
  -4   4   4   31.47    1.77
   4   4  -4   29.50    1.61
  -3  -4   4   46.56    2.22
  -3  -4   4   48.02    2.26
   3  -4  -4   46.79    2.65
   3  -4  -4   46.05    2.25
  -3  -4   4   43.48    2.52
  -3  -4   4   48.06    2.58
   3   4  -4   43.40    2.24
  -3   4   4   47.59    2.32
   2  -4  -4   25.46    1.60
  -2  -4   4   22.43    1.32
   2  -4  -4   23.33    1.29
  -2  -4   4   22.63    1.49
  -2  -4   4   23.29    1.52
  -2  -4   4   23.58    1.28
  -2   4   4   23.78    1.36
   2   4  -4   23.03    1.34
  -1  -4   4   55.43    3.03
  -1  -4   4   51.69    2.99
  -1  -4   4   55.15    2.69
   1  -4  -4   53.63    2.60
   1  -4  -4   58.95    2.99
  -1  -4   4   56.58    2.64
   1   4  -4   57.65    2.68
  -1   4   4   58.78    2.64
  -1   4   4   53.37    3.05
   1   4  -4   53.45    2.66
   1   4  -4   59.32    2.99
   0  -4  -4   37.35    2.01
   0  -4   4   36.03    1.86
   0  -4   4   32.23    2.04
   0  -4   4   35.24    2.09
   0  -4  -4   35.68    1.73
   0  -4   4   36.17    1.81
   0   4   4   35.32    2.10
   0   4  -4   34.00    1.81
   0   4  -4   35.43    2.04
   0   4  -4   32.48    1.84
   0   4   4   36.18    1.75
  -1  -4  -4   45.38    2.14
   1  -4   4   42.81    2.53
   1  -4   4   42.50    2.19
   1  -4   4   41.89    2.26
  -1  -4  -4   44.45    2.45
  -1   4  -4   48.04    2.52
  -1   4  -4   46.61    2.26
   1   4   4   45.29    2.14
  -1   4  -4   43.13    2.25
   1   4   4   45.82    2.12
   2  -4   4    4.56    0.72
   2  -4   4    4.09    0.76
  -2  -4  -4    5.43    0.68
   2  -4   4    6.46    0.88
  -2   4  -4    5.32    0.96
  -2   4  -4    4.96    0.71
   2   4   4    5.42    0.76
   2   4   4    4.74    0.68
  -2   4  -4    5.04    0.69
   2   4   4    5.51    0.61
   3  -4   4   20.12    1.27
  -3  -4  -4   19.83    1.12
   3  -4   4   21.03    1.44
   3  -4   4   20.41    1.49
  -3   4  -4   18.78    1.33
  -3   4  -4   17.56    1.37
   3   4   4   20.28    1.03
   3   4   4   18.79    1.24
   4  -4   4    2.85    0.73
  -4  -4  -4    2.62    0.42
   4  -4   4    2.73    0.50
   4  -4   4    2.04    0.62
   4   4   4    2.79    0.45
  -4   4  -4    2.54    0.59
   4   4   4    2.51    0.41
   4   4   4    3.42    0.53
  -4   4  -4    2.09    0.63
   5  -4   4    3.28    0.82
   5  -4   4    5.87    0.84
   5  -4   4    5.39    0.99
   5   4   4    6.43    0.68
  -5   4  -4    5.19    0.84
  -5   4  -4    5.35    0.90
   6  -4   4    4.40    0.82
   6  -4   4    4.70    1.24
   6  -4   4    3.17    0.56
  -6   4  -4    3.08    0.65
  -6   4  -4    4.31    0.99
  -8  -5   4    6.67    0.65
  -8  -5   4    4.80    0.65
   8  -5  -4    5.30    1.07
  -8  -5   4    6.69    0.83
  -8   5   4    8.53    1.22
  -8   5   4    6.22    1.28
   7  -5  -4    1.30    0.99
  -7  -5   4    2.45    0.59
  -7  -5   4    3.34    0.47
  -7  -5   4    4.11    0.71
   7  -5  -4    2.25    0.79
   7   5  -4    4.46    0.60
  -7   5   4    3.42    0.93
  -7   5   4    2.80    0.74
  -6  -5   4    7.73    0.74
  -6  -5   4    6.49    0.71
  -6  -5   4    5.84    0.80
   6  -5  -4    7.02    1.05
  -6   5   4    6.06    0.91
  -6   5   4    6.43    1.13
  -5  -5   4    4.34    0.66
   5  -5  -4    5.59    1.02
  -5  -5   4    5.17    0.69
   5  -5  -4    5.52    0.86
  -5  -5   4    5.23    0.71
  -5  -5   4    5.49    0.94
  -5   5   4    4.17    0.72
   5   5  -4    5.51    0.64
  -4  -5   4   17.13    1.23
  -4  -5   4   19.11    1.17
  -4  -5   4   20.92    1.39
   4  -5  -4   14.29    1.55
  -4  -5   4   18.99    1.13
   4  -5  -4   19.24    1.27
  -4   5   4   18.37    1.31
  -3  -5   4    1.04    0.64
  -3  -5   4    1.52    0.47
   3  -5  -4    1.47    0.90
  -3  -5   4    1.31    0.50
   3  -5  -4    1.83    0.50
  -3  -5   4    0.73    0.45
   3   5  -4    0.87    0.43
  -3   5   4    0.95    0.91
  -3   5   4    1.26    0.56
  -2  -5   4  129.27    6.77
  -2  -5   4  131.24    6.76
   2  -5  -4  133.18    6.80
   2  -5  -4  132.86    5.96
  -2  -5   4  131.07    6.00
  -2  -5   4  132.86    5.96
   2   5  -4  140.56    5.98
  -2   5   4  135.07    6.00
   2   5  -4  131.31    5.98
   1  -5  -4   25.20    1.56
  -1  -5   4   21.75    1.52
  -1  -5   4   21.98    1.40
  -1  -5   4   22.69    1.52
  -1  -5   4   23.56    1.34
   1  -5  -4   23.12    1.29
   1   5  -4   22.15    1.40
   1   5  -4   24.65    1.50
   1   5  -4   23.54    1.36
  -1   5   4   23.18    1.31
   0  -5  -4    6.24    0.69
   0  -5   4    5.47    0.88
   0  -5  -4    6.69    0.90
   0  -5   4    5.12    0.93
   0  -5   4    5.39    0.71
   0   5   4    5.26    1.04
   0   5   4    6.64    0.72
   0   5  -4    5.35    0.69
   0   5  -4    6.57    0.92
   0   5  -4    7.00    0.92
  -1  -5  -4   42.87    2.28
   1  -5   4   38.91    2.40
  -1  -5  -4   42.87    1.99
   1  -5   4   39.71    2.19
   1  -5   4   42.05    2.12
  -1   5  -4   42.43    2.16
   1   5   4   40.04    1.99
   1   5   4   41.41    1.99
  -1   5  -4   42.03    2.37
  -1   5  -4   36.70    2.12
   2  -5   4   20.54    1.51
  -2  -5  -4   21.61    1.18
   2  -5   4   21.37    1.41
   2  -5   4   20.12    1.65
  -2   5  -4   20.58    1.47
  -2   5  -4   21.63    1.47
   2   5   4   21.19    1.16
   2   5   4   20.88    1.17
   2   5   4   21.53    1.33
  -3  -5  -4    7.25    0.66
   3  -5   4    7.86    1.07
   3  -5   4    8.16    1.12
   3  -5   4    7.58    0.94
  -3   5  -4    7.25    1.01
  -3   5  -4    6.54    0.93
   3   5   4    6.48    0.72
   3   5   4    7.81    0.59
   4  -5   4   23.64    1.74
   4  -5   4   26.31    1.52
  -4  -5  -4   23.86    1.33
   4  -5   4   24.70    1.76
  -4   5  -4   26.02    1.69
   4   5   4   24.94    1.45
  -4   5  -4   26.25    1.67
   5  -5   4   14.86    1.30
   5  -5   4   13.59    1.59
   5  -5   4   15.44    1.15
  -5   5  -4   14.59    1.27
  -5   5  -4   15.61    1.52
   7  -6  -4    7.21    0.98
  -7  -6   4    7.63    0.76
  -7  -6   4    7.85    0.80
  -7  -6   4    7.44    0.97
  -7   6   4    6.34    1.03
  -7   6   4    8.25    1.18
  -6  -6   4    1.05    0.45
  -6  -6   4    2.03    0.43
  -6  -6   4    1.28    0.64
   6  -6  -4    2.94    0.95
  -6  -6   4    1.39    0.38
   6  -6  -4    1.16    0.66
  -6   6   4    2.05    0.73
  -6   6   4    1.76    0.73
  -5  -6   4   20.93    1.33
  -5  -6   4   23.39    1.22
  -5  -6   4   18.43    1.19
   5  -6  -4   21.99    1.38
  -5   6   4   20.56    1.48
  -5   6   4   20.68    1.64
   5   6  -4   21.34    1.19
  -4  -6   4   32.27    1.91
  -4  -6   4   30.56    1.84
   4  -6  -4   33.27    1.80
  -4  -6   4   31.91    1.67
  -4  -6   4   33.30    1.64
   4   6  -4   30.32    1.64
  -4   6   4   27.85    1.80
  -3  -6   4    7.41    0.84
  -3  -6   4    7.19    0.87
   3  -6  -4    6.01    1.09
  -3  -6   4    6.97    0.91
  -3  -6   4    7.13    0.98
   3  -6  -4    8.27    0.88
  -3   6   4    8.40    1.04
   3   6  -4    6.40    0.82
   2  -6  -4   53.12    2.54
  -2  -6   4   51.61    2.89
  -2  -6   4   49.86    2.87
   2  -6  -4   51.55    2.92
  -2  -6   4   50.89    2.56
  -2  -6   4   54.64    2.53
   2   6  -4   50.44    2.54
   2   6  -4   53.38    2.86
   2   6  -4   55.83    2.57
  -2   6   4   51.32    2.58
  -1  -6   4   74.10    4.13
  -1  -6   4   76.67    4.14
   1  -6  -4   81.72    4.11
  -1  -6   4   79.64    3.64
  -1  -6   4   78.70    3.70
   1  -6  -4   77.86    3.59
   1   6  -4   81.40    3.66
   1   6  -4   72.87    3.66
   1   6  -4   80.69    4.11
  -1   6   4   77.86    3.64
   0  -6   4    5.54    0.86
   0  -6   4    5.48    0.74
   0  -6  -4    6.31    0.99
   0  -6  -4    5.88    0.70
   0  -6   4    5.41    0.81
   0   6  -4    6.97    1.00
   0   6   4    5.88    0.77
   0   6  -4    5.57    0.98
   0   6  -4    4.32    0.67
  -1  -6  -4   35.11    1.94
   1  -6   4   32.17    1.94
   1  -6   4   31.96    1.80
  -1  -6  -4   33.57    1.66
   1  -6   4   31.68    2.08
  -1   6  -4   33.34    2.01
   1   6   4   33.60    1.67
  -1   6  -4   30.43    1.84
   1   6   4   34.46    1.69
  -1   6  -4   32.08    1.83
   2  -6   4   13.25    1.33
   2  -6   4   13.05    1.36
  -2  -6  -4   14.45    0.94
   2  -6   4   14.45    1.23
  -2  -6  -4   12.09    1.08
  -2   6  -4   13.37    1.25
   2   6   4   15.81    1.03
   2   6   4   12.87    0.87
   2   6   4   15.14    0.92
  -2   6  -4   15.11    1.26
   3  -6   4   22.87    1.42
   3  -6   4   19.95    1.56
   3  -6   4   20.86    1.52
  -3  -6  -4   21.73    1.14
  -3   6  -4   21.38    1.51
  -3   6  -4   21.99    1.46
   3   6   4   20.66    1.27
   3   6   4   20.72    1.08
   3   6   4   20.06    1.10
  -4  -6  -4    8.56    0.72
   4  -6   4    8.24    1.36
   4  -6   4    8.66    1.14
   4  -6   4    7.94    1.02
   4   6   4    7.62    0.72
  -4   6  -4    8.15    1.20
  -4   6  -4    8.93    1.09
   5  -6   4   -0.67    0.88
   5  -6   4    0.73    0.59
   5  -6   4   -0.18    0.48
  -5   6  -4   -0.13    0.53
  -5   6  -4    0.28    0.84
   7  -7  -4    0.94    1.09
  -7  -7   4    1.78    0.45
  -7  -7   4    2.04    0.46
  -7   7   4    2.28    0.75
  -7   7   4    1.61    0.96
  -6  -7   4    4.31    0.55
   6  -7  -4    3.64    0.75
  -6  -7   4    5.01    0.66
  -6   7   4    3.66    0.83
  -6   7   4    4.34    0.89
  -5  -7   4    7.20    0.75
   5  -7  -4    7.09    1.03
  -5  -7   4    7.58    0.99
  -5  -7   4    7.11    0.73
  -5  -7   4    6.28    0.79
  -5   7   4    6.50    1.21
  -5   7   4    7.02    1.06
   5   7  -4    6.92    0.72
  -4  -7   4   15.99    1.03
  -4  -7   4   15.03    1.16
  -4  -7   4   15.33    1.15
  -4  -7   4   14.89    1.06
   4  -7  -4   16.64    1.21
   4   7  -4   14.31    1.02
  -4   7   4   14.26    1.31
  -3  -7   4    1.53    0.53
   3  -7  -4    1.82    0.56
  -3  -7   4    1.65    0.51
   3  -7  -4    0.53    0.97
  -3  -7   4    1.10    0.50
  -3  -7   4    1.99    0.65
  -3   7   4    1.04    0.62
   3   7  -4    1.12    0.47
  -3   7   4   -0.69    0.79
   2  -7  -4   69.71    3.13
  -2  -7   4   65.48    3.15
  -2  -7   4   68.02    3.10
  -2  -7   4   62.77    3.52
  -2  -7   4   64.86    3.53
   2  -7  -4   60.74    3.57
   2   7  -4   67.90    3.13
  -2   7   4   65.90    3.17
   2   7  -4   67.96    3.51
   2   7  -4   61.90    3.11
   1  -7  -4   28.81    1.89
  -1  -7   4   26.04    1.86
  -1  -7   4   25.63    1.65
  -1  -7   4   31.44    1.66
   1  -7  -4   30.59    1.58
  -1   7   4   27.52    1.62
   1   7  -4   28.44    1.78
   1   7  -4   26.55    1.66
   1   7  -4   30.62    1.65
   0  -7  -4    2.26    0.46
   0  -7   4    1.46    0.69
   0  -7   4    1.96    0.68
   0  -7  -4    3.12    0.78
   0  -7   4    2.11    0.61
   0   7  -4    1.82    0.62
   0   7   4    1.96    0.49
   0   7  -4    2.93    0.70
   0   7  -4    1.37    0.62
  -1  -7  -4   47.92    2.22
   1  -7   4   45.11    2.40
   1  -7   4   43.08    2.74
  -1  -7  -4   47.58    2.55
   1  -7   4   45.95    2.49
   1   7   4   45.56    2.25
  -1   7  -4   47.08    2.70
  -1   7  -4   46.74    2.43
  -2  -7  -4   16.00    0.96
  -2  -7  -4   12.99    1.13
   2  -7   4   14.38    1.34
   2  -7   4   14.81    1.42
   2  -7   4   15.22    1.26
  -2   7  -4   15.85    1.40
   2   7   4   15.96    0.97
  -2   7  -4   17.11    1.34
  -3  -7  -4    7.64    0.69
   3  -7   4    7.99    1.16
   3  -7   4    8.64    1.27
   3  -7   4    8.59    1.03
   3   7   4    8.58    0.63
  -3   7  -4    8.39    1.13
   3   7   4    8.57    0.63
   3   7   4    8.68    0.75
  -3   7  -4   10.54    1.15
   4  -7   4    6.57    1.04
   4  -7   4    6.01    1.07
   4  -7   4    4.50    0.92
  -4  -7  -4    6.64    0.63
  -4   7  -4    6.55    1.09
   4   7   4    5.46    0.62
  -4   7  -4    5.53    0.86
   4   7   4    4.47    0.68
   5  -7   4    3.10    0.64
   5  -7   4    2.39    1.01
   5  -7   4    3.17    0.67
  -5   7  -4    3.41    0.71
  -5   7  -4    3.87    0.99
  -7  -8   4    8.67    0.85
   7  -8  -4    7.06    1.14
  -7  -8   4    9.61    0.91
  -7   8   4    9.86    1.32
  -7   8   4    9.66    1.63
   6  -8  -4   -1.66    0.90
   6  -8  -4   -1.22    0.69
  -6  -8   4    1.44    0.64
  -6  -8   4    0.88    0.38
  -6  -8   4   -0.18    0.45
  -6   8   4   -0.31    0.72
  -6   8   4    0.84    0.76
  -5  -8   4   55.97    2.48
   5  -8  -4   54.58    2.63
  -5  -8   4   53.38    2.49
  -5  -8   4   43.43    2.78
  -5  -8   4   51.08    2.80
  -5   8   4   52.89    3.09
  -5   8   4   51.38    2.74
  -4  -8   4   27.63    1.66
  -4  -8   4   29.43    1.50
  -4  -8   4   25.40    1.64
  -4  -8   4   28.16    1.47
   4  -8  -4   28.92    1.63
  -4   8   4   25.77    1.70
   4   8  -4   25.64    1.45
  -4   8   4   21.57    1.91
  -3  -8   4    9.86    1.12
  -3  -8   4    9.21    1.08
   3  -8  -4   12.58    1.12
  -3  -8   4   10.67    1.04
  -3  -8   4   11.93    0.99
  -3   8   4   10.95    1.18
   3   8  -4   12.24    1.08
   3   8  -4   11.54    0.99
  -2  -8   4   54.60    2.57
  -2  -8   4   51.83    2.94
  -2  -8   4   50.49    2.93
   2  -8  -4   55.43    2.60
  -2  -8   4   52.63    2.64
   2   8  -4   54.98    2.60
   2   8  -4   46.81    2.57
  -2   8   4   51.63    2.65
   2   8  -4   54.06    2.90
   1  -8  -4   71.97    3.99
  -1  -8   4   72.46    3.98
  -1  -8   4   72.70    3.56
   1  -8  -4   77.38    3.47
  -1  -8   4   76.67    3.52
   1   8  -4   67.67    3.49
   1   8  -4   78.28    3.52
  -1   8   4   71.46    3.51
   1   8  -4   76.55    3.96
   0  -8   4    8.55    1.12
   0  -8  -4    8.04    1.12
   0  -8   4    6.30    1.15
   0  -8  -4   10.74    0.87
   0  -8   4    8.87    1.23
   0   8  -4    7.61    1.07
   0   8   4    8.01    0.96
   0   8  -4    9.74    1.13
   1  -8   4   26.06    1.78
   1  -8   4   26.05    1.99
  -1  -8  -4   28.23    1.72
  -1  -8  -4   29.23    1.48
   1  -8   4   27.76    1.69
   1   8   4   28.43    1.54
  -1   8  -4   27.24    1.85
  -1   8  -4   28.38    1.77
   2  -8   4   22.13    1.49
  -2  -8  -4   18.99    1.34
   2  -8   4   21.47    1.60
   2  -8   4   21.50    1.68
  -2  -8  -4   21.21    1.16
  -2   8  -4   20.48    1.48
  -2   8  -4   22.26    1.61
   2   8   4   20.45    1.18
   3  -8   4    2.31    0.67
  -3  -8  -4    1.78    0.37
   3  -8   4    2.44    0.78
   3  -8   4    2.91    0.77
   3   8   4    2.54    0.44
   3   8   4    3.02    0.60
  -3   8  -4    2.64    0.76
  -3   8  -4    2.17    0.71
   3   8   4    2.47    0.32
  -4  -8  -4    0.47    0.33
   4  -8   4    1.01    0.84
   4  -8   4    0.61    0.66
   4  -8   4   -0.05    0.58
  -4   8  -4   -0.19    0.75
  -4   8  -4    0.25    0.67
   4   8   4    0.22    0.38
   4   8   4    0.52    0.32
   5  -8   4    0.28    0.58
   5  -8   4   -0.63    1.09
   5  -8   4    0.36    0.57
  -5   8  -4    0.80    0.65
  -5   8  -4    0.66    0.97
  -7  -9   4    1.60    0.59
  -7  -9   4    2.24    0.46
  -7  -9   4    2.46    0.53
  -7   9   4    1.73    1.09
  -6  -9   4   10.68    0.87
   6  -9  -4    7.75    1.34
  -6  -9   4    8.21    0.92
  -6   9   4    9.96    1.34
  -6   9   4   11.53    1.41
  -5  -9   4    2.36    0.56
  -5  -9   4    2.33    0.46
  -5  -9   4    1.22    0.45
   5  -9  -4    1.32    1.01
  -5  -9   4    3.48    0.65
   5  -9  -4    1.95    0.65
  -5   9   4    2.51    0.84
  -5   9   4    2.00    0.74
  -4  -9   4   23.00    1.54
  -4  -9   4   25.57    1.39
  -4  -9   4   24.83    1.39
   4  -9  -4   25.86    1.54
  -4  -9   4   23.89    1.57
  -4   9   4   22.71    1.78
  -4   9   4   21.87    1.62
   3  -9  -4   11.73    1.08
  -3  -9   4   11.62    0.99
  -3  -9   4    9.45    1.08
  -3  -9   4   10.23    0.99
  -3  -9   4   10.63    1.11
  -3   9   4    9.60    1.33
   3   9  -4   11.20    0.96
   3   9  -4    9.73    1.04
  -3   9   4    8.85    1.21
  -2  -9   4   11.35    1.14
  -2  -9   4   11.70    1.28
  -2  -9   4   11.44    1.28
  -2  -9   4   12.96    1.14
   2  -9  -4   13.20    1.13
   2   9  -4   12.99    1.08
   2   9  -4   13.82    1.22
  -2   9   4   12.13    1.16
  -1  -9   4    6.12    0.81
  -1  -9   4    6.85    1.03
   1  -9  -4    7.13    0.91
  -1  -9   4    6.09    0.89
   1  -9  -4    4.49    0.98
   1   9  -4    6.20    0.96
   1   9  -4    5.28    1.04
  -1   9   4    5.77    1.00
   0  -9  -4   37.63    1.97
   0  -9   4   36.74    2.17
   0  -9   4   39.01    2.14
   0  -9   4   37.00    2.43
   0  -9  -4   40.74    2.33
   0   9  -4   40.23    2.15
   0   9  -4   39.81    2.34
   0   9   4   38.69    2.04
   1  -9   4   74.14    3.91
   1  -9   4   80.23    4.42
  -1  -9  -4   79.63    3.70
  -1  -9  -4   86.79    4.25
   1  -9   4   79.35    3.85
   1   9   4   81.79    3.75
  -1   9  -4   82.36    3.87
  -1   9  -4   82.39    4.35
  -2  -9  -4   15.21    1.14
  -2  -9  -4   14.95    0.94
   2  -9   4   14.90    1.47
   2  -9   4   15.00    1.49
   2  -9   4   16.57    1.36
   2   9   4   14.21    0.98
  -2   9  -4   14.82    1.35
  -2   9  -4   14.74    1.43
   3  -9   4    7.00    1.16
   3  -9   4    4.87    0.79
  -3  -9  -4    4.39    0.62
   3  -9   4    5.23    0.90
  -3   9  -4    5.28    0.88
   3   9   4    5.08    0.67
   3   9   4    4.67    0.45
   3   9   4    5.20    0.48
  -3   9  -4    5.18    0.90
   4  -9   4   14.59    1.45
   4  -9   4   18.06    1.71
   4  -9   4   15.85    1.34
   4   9   4   14.69    0.96
  -4   9  -4   17.25    1.64
   4   9   4   14.61    1.00
  -4   9  -4   15.47    1.48
   5  -9   4    2.37    1.24
   5  -9   4    3.86    0.77
  -5   9  -4    5.25    1.26
  -5   9  -4    5.66    1.11
   7 -10  -4    7.65    1.39
  -7 -10   4    8.53    0.82
  -7 -10   4   10.56    1.05
  -7  10   4   11.25    1.86
  -7  10   4   11.97    1.46
  -6 -10   4    1.58    0.52
  -6 -10   4    2.50    0.66
   6 -10  -4    0.80    0.85
  -6  10   4    2.87    0.86
  -6  10   4    2.99    0.86
  -5 -10   4   22.15    1.31
  -5 -10   4   19.63    1.47
  -5 -10   4   21.63    1.28
   5 -10  -4   21.44    1.50
  -5 -10   4   20.88    1.43
  -5  10   4   21.82    1.67
  -5  10   4   19.91    1.80
  -4 -10   4   12.63    1.14
  -4 -10   4   13.72    1.03
  -4 -10   4   13.11    1.19
  -4 -10   4   12.16    1.05
   4 -10  -4   14.50    1.22
  -4  10   4   13.98    1.48
  -4  10   4   13.40    1.27
   3 -10  -4   33.43    1.79
  -3 -10   4   34.34    1.72
  -3 -10   4   29.83    1.93
  -3 -10   4   31.40    1.93
  -3 -10   4   29.43    1.72
  -3  10   4   29.02    1.86
   3  10  -4   28.54    1.67
  -3  10   4   29.36    2.11
   3  10  -4   31.94    1.89
  -2 -10   4   17.81    1.36
  -2 -10   4   16.80    1.46
   2 -10  -4   20.76    1.31
  -2 -10   4   19.88    1.32
   2  10  -4   19.08    1.40
   2  10  -4   19.87    1.30
  -2  10   4   19.57    1.62
  -2  10   4   16.35    1.34
  -1 -10   4   18.09    1.57
   1 -10  -4   20.58    1.29
  -1 -10   4   18.59    1.35
  -1 -10   4   18.23    1.46
  -1  10   4   17.95    1.63
   1  10  -4   19.22    1.37
  -1  10   4   19.82    1.40
   1  10  -4   19.97    1.51
   0 -10  -4    1.50    0.80
   0 -10   4    1.70    0.67
   0 -10  -4    1.83    0.47
   0 -10   4    2.79    0.79
   0 -10   4    2.05    0.70
   0  10   4    1.66    0.56
   0  10   4    0.54    0.66
   0  10  -4    1.90    0.70
   0  10  -4    2.04    0.65
  -1 -10  -4    6.43    1.05
   1 -10   4    8.30    1.20
  -1 -10  -4    6.69    0.75
   1 -10   4    7.83    1.12
   1 -10   4    6.05    1.03
   1  10   4    7.33    0.86
  -1  10  -4    6.94    1.16
   1  10   4    5.52    1.06
  -1  10  -4    7.75    1.13
  -2 -10  -4   10.76    1.04
   2 -10   4    9.70    1.26
   2 -10   4   10.20    1.36
   2 -10   4    8.82    1.32
  -2 -10  -4   10.76    0.80
   2  10   4    9.65    1.11
   2  10   4    9.15    0.85
  -2  10  -4   10.81    1.34
  -2  10  -4    8.97    1.23
  -3 -10  -4    5.01    0.67
   3 -10   4    7.37    1.01
   3 -10   4    5.66    1.11
   3 -10   4    6.80    1.11
  -3  10  -4    7.05    1.20
   3  10   4    6.49    0.73
   3  10   4    5.93    0.43
  -3  10  -4    7.72    1.19
   4 -10   4    1.72    0.78
  -4 -10  -4    1.13    0.36
   4 -10   4    1.67    1.02
   4 -10   4    1.69    0.70
  -4  10  -4    1.26    0.74
   4  10   4    1.33    0.34
  -4  10  -4    0.88    0.88
   4  10   4    1.63    0.40
  -6 -11   4   10.56    1.21
   6 -11  -4    9.87    1.19
  -6 -11   4   13.96    1.07
  -6 -11   4   10.22    1.06
  -6  11   4   10.62    1.43
  -6  11   4   10.75    1.49
  -5 -11   4    1.96    0.47
  -5 -11   4    1.57    0.62
   5 -11  -4   -0.17    0.96
  -5 -11   4    1.34    0.53
  -5 -11   4    1.61    0.64
  -5  11   4    1.61    0.83
  -5  11   4    1.21    0.74
  -4 -11   4    5.78    0.96
  -4 -11   4    6.15    0.84
  -4 -11   4    5.70    1.06
  -4 -11   4    4.54    0.88
   4 -11  -4    5.35    0.80
  -4  11   4    6.05    1.01
  -4  11   4    7.42    1.17
  -3 -11   4    3.00    0.70
  -3 -11   4    3.03    0.69
  -3 -11   4    1.76    0.56
  -3 -11   4    1.96    0.53
   3 -11  -4    2.63    0.64
  -3  11   4    1.56    0.79
   3  11  -4    2.48    0.65
   3  11  -4    1.89    0.50
  -3  11   4    2.26    0.71
   2 -11  -4   30.11    1.66
  -2 -11   4   28.57    1.67
  -2 -11   4   26.14    1.69
  -2 -11   4   26.71    1.86
  -2  11   4   27.64    2.00
   2  11  -4   27.49    1.80
   2  11  -4   28.40    1.62
  -2  11   4   26.48    1.72
   1 -11  -4   48.22    2.36
  -1 -11   4   45.82    2.42
  -1 -11   4   43.89    2.74
  -1 -11   4   44.16    2.44
  -1  11   4   45.17    2.42
   1  11  -4   50.66    2.45
   1  11  -4   48.51    2.70
  -1  11   4   44.94    2.78
   0 -11   4    0.58    0.63
   0 -11  -4   -0.10    0.80
   0 -11  -4    0.62    0.47
   0 -11   4    1.37    0.65
   0 -11   4    0.83    0.70
   0  11  -4    1.65    0.71
   0  11   4    1.16    0.71
   0  11   4    1.05    0.51
   0  11  -4    1.09    0.65
  -1 -11  -4    3.89    0.84
   1 -11   4    3.77    0.77
   1 -11   4    3.90    0.84
   1 -11   4    4.53    0.80
  -1 -11  -4    4.66    0.72
   1  11   4    3.36    0.74
  -1  11  -4    2.19    0.71
   1  11   4    3.35    0.56
  -1  11  -4    3.54    0.83
   2 -11   4   33.32    2.00
   2 -11   4   32.21    2.24
   2 -11   4   32.59    2.09
  -2 -11  -4   33.18    1.98
  -2 -11  -4   33.14    1.69
   2  11   4   31.71    2.09
  -2  11  -4   35.81    2.23
  -2  11  -4   34.58    2.09
   2  11   4   32.90    1.73
  -3 -11  -4    1.11    0.39
   3 -11   4    0.61    0.73
  -3 -11  -4    1.24    0.55
   3 -11   4    1.57    0.84
   3 -11   4    1.51    0.77
  -3  11  -4    1.39    0.80
  -3  11  -4    0.50    0.76
   4 -11   4   12.21    1.49
  -4 -11  -4   10.81    0.83
   4 -11   4   12.57    1.42
   4 -11   4   14.85    1.94
  -4  11  -4   13.34    1.45
  -4  11  -4   15.07    1.61
   4  11   4   12.09    0.86
   4  11   4   10.69    0.81
   6 -12  -4   -0.30    0.97
  -6  12   4    1.86    0.86
  -6  12   4    2.20    0.93
  -5 -12   4   30.35    1.69
  -5 -12   4   27.28    1.94
  -5 -12   4   27.04    1.77
  -5 -12   4   29.92    1.66
   5 -12  -4   29.51    1.89
  -5  12   4   29.55    1.98
  -5  12   4   30.26    2.16
   4 -12  -4    3.92    0.77
  -4 -12   4    5.87    0.75
  -4 -12   4    5.79    0.95
  -4 -12   4    8.22    0.88
  -4 -12   4    6.19    1.18
  -4  12   4    6.63    0.93
  -4  12   4    6.33    1.05
  -3 -12   4    8.43    0.97
   3 -12  -4    5.88    0.99
  -3 -12   4    6.77    1.08
  -3 -12   4    6.74    1.08
  -3 -12   4    7.10    1.21
   3  12  -4    9.82    1.12
  -3  12   4    8.47    1.18
   3  12  -4    9.64    0.95
  -3  12   4    7.78    1.38
  -2 -12   4   13.62    1.26
  -2 -12   4   15.40    1.25
   2 -12  -4   13.38    1.17
  -2 -12   4   12.98    1.36
   2  12  -4   13.52    1.30
   2  12  -4   13.47    1.14
  -2  12   4   13.83    1.31
  -2  12   4   12.61    1.41
  -1 -12   4   10.38    1.35
  -1 -12   4   11.92    1.31
  -1 -12   4   11.91    1.27
   1 -12  -4   11.09    1.06
  -1  12   4   12.33    1.42
   1  12  -4   11.45    1.29
  -1  12   4   11.45    1.17
   1  12  -4   11.11    1.16
   0 -12   4    5.69    0.96
   0 -12  -4    6.06    0.88
   0 -12   4    8.13    1.20
   0 -12   4    5.45    0.84
   0  12  -4    6.13    0.83
   0  12   4    5.89    0.96
   0  12   4    6.50    1.25
   0  12  -4    5.91    1.15
   1 -12   4   18.93    1.68
   1 -12   4   18.71    1.54
   1 -12   4   17.13    1.43
  -1 -12  -4   15.10    1.53
  -1 -12  -4   19.30    1.16
  -1  12  -4   17.97    1.64
  -1  12  -4   16.64    1.45
   1  12   4   17.01    1.24
   1  12   4   17.07    1.57
   2 -12   4   12.39    1.46
   2 -12   4   10.75    1.34
  -2 -12  -4   11.34    0.90
  -2 -12  -4   11.25    1.20
   2 -12   4   12.01    1.38
  -2  12  -4   11.30    1.39
  -2  12  -4   13.99    1.45
   2  12   4   11.66    0.98
   2  12   4   11.58    1.34
  -3 -12  -4    5.17    0.76
   3 -12   4    7.17    1.21
   3 -12   4    4.68    0.86
  -3 -12  -4    5.27    0.93
   3 -12   4    6.28    1.05
  -3  12  -4    6.34    1.22
  -3  12  -4    6.04    0.95
   4 -12   4    2.09    0.76
   4 -12   4    2.19    1.27
  -4 -12  -4    1.14    0.41
   4  12   4    1.48    0.42
  -4  12  -4    0.41    0.78
  -4  12  -4    2.07    1.03
   4  12   4    1.26    0.37
   5 -13  -4   -0.87    0.75
  -5 -13   4    1.08    0.82
  -5 -13   4   -0.30    0.64
  -5  13   4    1.73    0.74
  -5  13   4    2.97    0.88
  -4 -13   4    4.97    0.99
  -4 -13   4    7.23    1.15
  -4 -13   4    7.10    1.29
   4 -13  -4    5.00    0.82
  -4  13   4    7.03    1.10
   4  13  -4    6.13    1.13
  -4  13   4    6.19    0.91
  -3 -13   4    2.27    0.80
  -3 -13   4    1.80    0.69
   3 -13  -4    1.01    0.64
  -3 -13   4    2.47    0.59
  -3 -13   4    2.94    0.74
  -3  13   4    2.67    0.93
  -3  13   4    2.87    0.78
   3  13  -4    2.55    0.78
   3  13  -4    1.17    0.54
  -2 -13   4    0.83    0.60
  -2 -13   4    0.68    0.79
   2 -13  -4    0.48    0.59
  -2 -13   4    0.14    0.70
   2 -13  -4    0.18    1.04
  -2  13   4    0.71    0.87
  -2  13   4    0.76    0.65
   2  13  -4    0.01    0.76
   2  13  -4    0.60    0.58
  -1 -13   4    9.74    1.43
  -1 -13   4   10.40    1.27
   1 -13  -4    9.31    1.02
  -1 -13   4    9.82    1.25
  -1  13   4    8.29    1.37
   1  13  -4    9.53    1.27
  -1  13   4   10.49    1.18
   1  13  -4    9.26    1.20
   0 -13   4    3.52    0.87
   0 -13  -4    2.09    0.54
   0 -13   4    3.21    0.77
   0 -13   4    1.69    0.75
   0  13  -4    2.82    0.87
   0  13   4    3.30    0.94
   0  13   4    2.59    0.62
   0  13  -4    2.67    0.75
   1 -13   4   31.33    1.98
   1 -13   4   31.02    2.25
  -1 -13  -4   32.08    1.69
   1 -13   4   31.73    2.00
  -1  13  -4   33.14    2.21
   1  13   4   29.14    1.75
  -1  13  -4   28.68    1.93
   1  13   4   30.55    2.18
  -2 -13  -4   20.16    1.28
  -2 -13  -4   20.72    1.69
   2 -13   4   25.18    1.78
   2 -13   4   22.39    1.74
   2 -13   4   19.69    1.76
   2  13   4   22.22    1.80
  -2  13  -4   22.73    1.71
   2  13   4   22.13    1.35
  -2  13  -4   24.02    1.87
  -3 -13  -4   -0.62    0.47
   3 -13   4   -0.85    0.75
   3 -13   4    0.13    0.66
   3 -13   4    1.02    0.98
  -3 -13  -4   -0.07    0.66
  -3  13  -4    0.76    0.78
  -3  13  -4    1.00    0.80
   5 -14  -4   20.50    1.79
  -5 -14   4   25.00    1.65
  -5 -14   4   18.75    1.57
  -5  14   4   21.74    1.67
  -5  14   4   26.76    2.02
  -4 -14   4    3.91    0.75
  -4 -14   4    4.83    1.05
  -4 -14   4    5.23    0.85
   4 -14  -4    2.49    0.78
  -4  14   4    7.55    1.42
   4  14  -4    3.70    0.90
  -4  14   4    5.25    0.87
  -3 -14   4    4.55    0.95
   3 -14  -4    4.03    0.76
  -3 -14   4    4.79    0.88
  -3 -14   4    4.52    0.81
   3  14  -4    4.05    0.64
  -3  14   4    5.22    1.04
   3  14  -4    4.45    0.88
  -3  14   4    3.71    0.78
   2 -14  -4    1.19    0.63
   2 -14  -4   -0.90    1.08
  -2 -14   4    1.34    0.59
  -2 -14   4    1.55    0.76
  -2 -14   4    2.26    0.91
  -2  14   4    0.91    0.68
  -2  14   4    1.94    0.93
   2  14  -4    1.03    0.82
   2  14  -4    0.87    0.60
  -1 -14   4    1.79    0.77
   1 -14  -4    1.28    0.59
  -1 -14   4    3.40    0.91
  -1 -14   4    2.34    0.75
   1  14  -4    2.06    0.70
  -1  14   4    2.36    0.69
   1  14  -4    2.55    0.88
  -1  14   4    2.53    1.01
   0 -14   4    5.29    1.01
   0 -14   4    4.34    0.84
   0 -14  -4    5.24    0.84
   0 -14   4    4.19    0.86
   0  14  -4    4.89    0.98
   0  14   4    3.71    0.68
   0  14   4    5.26    1.04
   0  14  -4    4.07    0.82
  -1 -14  -4    3.11    0.55
   1 -14   4    4.47    0.91
   1 -14   4    5.44    1.01
  -1 -14  -4    0.99    1.03
   1 -14   4    6.46    1.05
   1  14   4    3.72    0.62
  -1  14  -4    2.62    0.77
   1  14   4    3.78    0.98
  -1  14  -4    5.50    1.00
  -2 -14  -4    2.07    0.99
  -2 -14  -4    1.34    0.51
   2 -14   4    2.30    0.85
   2 -14   4    2.26    0.81
   2 -14   4    3.03    0.87
   2  14   4    2.65    0.96
  -2  14  -4    2.38    0.91
   2  14   4    2.21    0.60
  -2  14  -4    2.35    0.81
  -3 -14  -4    4.63    0.67
   3 -14   4    5.54    1.19
   3 -14   4    5.39    0.94
  -3  14  -4    7.13    1.36
  -4 -15   4    6.12    1.22
  -4 -15   4    5.71    1.09
  -4 -15   4    5.31    0.92
  -4 -15   4    8.24    1.07
   4 -15  -4    3.07    0.85
   4  15  -4    3.48    0.97
  -4  15   4    5.28    0.86
  -4  15   4    6.13    1.15
  -3 -15   4    3.01    0.76
  -3 -15   4    2.87    0.57
  -3 -15   4    1.78    0.88
  -3 -15   4    2.56    1.07
   3 -15  -4    0.91    0.66
   3  15  -4    1.32    0.61
  -3  15   4    2.74    1.05
   3  15  -4    2.21    0.96
  -3  15   4    1.89    0.70
   2 -15  -4   -1.18    1.20
   2 -15  -4   -0.31    0.61
  -2 -15   4    0.67    1.00
  -2 -15   4    1.01    0.86
   2  15  -4    0.51    0.57
  -2  15   4    1.83    0.64
   2  15  -4    0.37    0.89
  -2  15   4    1.41    1.01
  -1 -15   4    2.75    0.88
  -1 -15   4    2.44    1.02
  -1 -15   4    1.75    0.68
   1 -15  -4    1.11    0.63
   1  15  -4    2.09    0.70
  -1  15   4    2.26    1.06
   1  15  -4    1.88    0.98
  -1  15   4    1.75    0.63
   0 -15   4    2.42    0.86
   0 -15   4    2.52    0.97
   0 -15  -4    1.59    0.56
   0 -15   4    2.17    0.69
   0  15   4    2.94    1.09
   0  15   4    1.76    0.59
   0  15  -4    1.03    0.75
   0  15  -4    3.35    1.00
   1 -15   4   18.35    1.46
   1 -15   4   16.94    1.64
   1 -15   4   16.93    1.80
  -1 -15  -4   12.66    1.14
  -1  15  -4   16.42    1.71
   1  15   4   15.76    1.92
   1  15   4   13.95    1.24
  -1  15  -4   12.22    1.41
   2 -15   4   18.10    1.90
   2 -15   4   20.70    1.86
   2 -15   4   24.41    1.87
  -2  15  -4   24.19    1.99
   2  15   4   20.46    2.07
  -2  15  -4   20.99    1.67
   2  15   4   20.63    1.52
  -3 -16   4    5.63    1.29
  -3 -16   4    5.13    0.87
  -3 -16   4    4.60    1.06
   3  16  -4    4.28    0.74
   3  16  -4    4.43    1.18
  -3  16   4    4.38    0.82
  -3  16   4    6.34    1.35
  -2 -16   4   14.14    1.84
  -2 -16   4   14.87    1.29
  -2 -16   4   13.98    2.06
  -2  16   4   15.34    2.08
   2  16  -4   13.12    1.83
   2  16  -4   12.90    1.25
  -2  16   4   15.76    1.38
  -1 -16   4    2.73    0.65
  -1 -16   4    2.94    1.00
   1 -16  -4    1.37    0.66
  -1 -16   4    3.34    1.23
  -1  16   4    2.83    0.70
   1  16  -4    2.42    1.11
   1  16  -4    3.65    0.74
  -1  16   4    2.62    1.27
   0 -16   4    0.69    0.93
   0 -16   4    2.05    1.15
   0 -16   4    1.21    0.74
   0 -16  -4   -0.30    0.53
   0  16   4    1.37    1.24
   0  16  -4   -0.33    0.72
   0  16  -4    1.17    1.05
   0  16   4    0.92    0.60
   1 -16   4    3.42    1.22
   1 -16   4    2.74    0.98
   1  16   4    4.11    1.31
   1  16   4    3.72    0.72
  -1  16  -4    1.50    0.79
  -1  16  -4    4.06    1.16
  -2 -17   4    5.24    1.51
  -2 -17   4    5.97    1.25
  -2  17   4    7.09    1.57
   2  17  -4    3.99    1.27
   2  17  -4    3.48    0.74
  -1 -17   4    9.03    1.35
  -1 -17   4   12.15    2.38
  -1  17   4   12.57    2.40
   1  17  -4   10.23    1.29
  -1  17   4    8.55    1.16
   1  17  -4   10.76    2.01
   0  17  -4    3.91    1.31
   8   0  -5    1.63    0.73
   8   0  -5    3.13    0.72
  -8   0   5    1.42    0.74
  -8   0   5    1.59    0.98
   7   0  -5    6.07    0.80
  -7   0   5    3.61    0.80
   7   0  -5    4.69    0.69
   6   0  -5    0.91    0.66
  -5   0   5    0.77    0.86
   5   0  -5    3.29    0.72
   5   0  -5    2.10    0.49
  -5   0   5    1.90    0.56
  -4   0   5    0.74    0.53
   4   0  -5    0.27    0.71
  -4   0   5    1.64    0.97
   4   0  -5    0.54    0.49
   3   0  -5    4.45    0.62
  -3   0   5    6.51    1.08
   3   0  -5    5.42    0.89
  -3   0   5    4.92    0.82
  -2   0   5  188.73    8.83
   2   0  -5  174.63    7.75
  -2   0   5  167.69    7.75
  -2   0   5  169.18    7.73
   2   0  -5  168.07    8.79
  -1   0   5    2.10    0.57
   1   0  -5    1.33    0.49
  -1   0   5    1.22    0.50
   1   0  -5    0.50    0.64
  -1   0   5    1.67    0.78
  -1   0   5    1.84    0.48
   0   0   5   29.99    1.70
   0   0   5   33.76    2.01
   0   0   5   31.31    1.66
   0   0  -5   30.96    1.72
   0   0   5   32.81    1.94
   1   0   5  149.73    7.04
   1   0   5  163.95    7.98
   1   0   5  159.03    7.00
  -1   0  -5  157.90    7.06
   1   0   5  154.71    7.98
   2   0   5    2.70    0.59
   2   0   5    4.61    0.81
   2   0   5    5.26    0.70
  -2   0  -5    2.64    0.59
  -2   0  -5    4.11    0.61
   2   0   5    3.56    0.67
   3   0   5    3.05    0.58
  -3   0  -5    3.55    0.58
  -3   0  -5    3.29    0.58
   3   0   5    4.59    0.75
   3   0   5    3.23    0.63
   3   0   5    3.59    0.60
   4   0   5    6.97    1.12
  -4   0  -5    7.75    1.01
   4   0   5    8.75    1.12
   4   0   5    7.42    0.69
   4   0   5    6.80    0.95
   5   0   5    0.02    0.37
   5   0   5    0.58    0.67
  -5   0  -5    0.08    0.68
   5   0   5    0.53    0.82
  -8  -1   5   14.92    1.48
   8  -1  -5   15.98    1.40
  -8  -1   5   12.30    1.68
   8  -1  -5   16.42    1.45
  -8   1   5   12.64    1.75
   8   1  -5   15.06    1.38
  -8   1   5   16.79    1.45
   8   1  -5   13.32    1.31
   7  -1  -5   -0.07    0.60
   7  -1  -5   -0.08    0.59
  -7  -1   5    0.87    0.71
  -7  -1   5   -0.18    0.65
   7   1  -5    0.30    0.54
  -7   1   5    1.26    0.69
   7   1  -5   -0.29    0.55
  -7   1   5   -0.80    0.71
  -6  -1   5   19.05    1.34
   6  -1  -5   18.32    1.28
   6  -1  -5   18.57    1.49
   6   1  -5   21.38    1.45
   6   1  -5   19.38    1.26
  -6   1   5   19.13    1.42
   5  -1  -5   20.88    1.31
  -5  -1   5   19.64    1.31
   5  -1  -5   21.37    1.57
   5   1  -5   22.35    1.54
   5   1  -5   21.06    1.28
  -5   1   5   20.18    1.38
   4  -1  -5    0.30    0.81
  -4  -1   5    0.18    0.49
  -4  -1   5    1.07    0.96
   4  -1  -5    0.35    0.48
  -4   1   5    0.17    0.53
   4   1  -5    0.10    0.48
   4   1  -5    0.25    0.69
  -4   1   5   -0.20    1.05
  -3  -1   5    2.85    0.55
   3  -1  -5    3.28    0.56
   3  -1  -5    4.38    0.81
  -3  -1   5    5.32    0.95
  -3  -1   5    3.54    0.55
  -3   1   5    4.24    1.13
   3   1  -5    2.91    0.57
   3   1  -5    3.45    0.77
  -3   1   5    3.52    0.58
  -2  -1   5   34.01    1.82
   2  -1  -5   36.39    1.87
  -2  -1   5   34.52    1.88
  -2  -1   5   38.67    2.17
   2  -1  -5   34.97    2.19
  -2  -1   5   37.23    2.08
   2   1  -5   34.75    1.87
  -2   1   5   39.20    2.26
   2   1  -5   32.30    2.11
  -2   1   5   35.40    1.85
  -1  -1   5   67.65    3.49
   1  -1  -5   64.09    3.01
  -1  -1   5   63.27    3.01
  -1  -1   5   64.16    3.44
   1  -1  -5   60.28    3.46
  -1  -1   5   63.16    3.05
  -1   1   5   70.28    3.48
  -1   1   5   61.42    3.02
   1   1  -5   57.83    3.43
  -1   1   5   65.10    3.40
   1   1  -5   64.51    3.05
  -1   1   5   65.37    3.01
   0  -1   5   15.14    1.13
   0  -1   5   14.27    1.19
   0  -1  -5   14.53    1.10
   0  -1   5   15.46    1.05
   0  -1   5   16.13    1.36
   0  -1  -5   12.53    1.22
   0   1  -5   13.78    1.10
   0   1   5   14.56    1.11
   0   1   5   15.13    1.03
   0   1   5   14.52    1.20
   0   1   5   16.57    1.34
   1  -1   5   12.17    1.24
   1  -1   5   13.21    1.31
   1  -1   5   13.70    0.99
  -1  -1  -5   13.73    1.05
   1  -1   5   11.65    1.11
  -1   1  -5   15.88    1.17
   1   1   5   12.23    1.09
   1   1   5   14.01    0.96
   1   1   5   14.65    1.28
   1   1   5   13.12    1.17
  -1   1  -5   11.10    1.11
  -2  -1  -5    7.87    0.93
   2  -1   5    9.53    0.84
   2  -1   5    8.72    1.09
   2  -1   5    7.94    1.03
   2  -1   5    9.30    1.17
   2   1   5    9.04    0.78
  -2   1  -5    7.82    1.03
   2   1   5   10.03    1.15
   2   1   5    6.75    0.97
   2   1   5    7.55    0.94
  -2   1  -5    8.76    1.00
  -3  -1  -5    1.20    0.43
   3  -1   5    0.94    0.51
   3  -1   5    1.46    0.58
   3  -1   5    0.94    0.38
   3  -1   5    1.29    0.69
   3   1   5    0.89    0.33
  -3   1  -5   -0.09    0.46
   3   1   5    1.30    0.66
  -3   1  -5    0.99    0.54
   3   1   5    1.13    0.50
   3   1   5    0.81    0.52
   4  -1   5    0.26    0.64
   4  -1   5    0.32    0.36
   4  -1   5    0.71    0.73
   4  -1   5    0.41    0.50
   4   1   5    0.10    0.66
   4   1   5    0.84    0.57
   4   1   5    0.08    0.47
   4   1   5    0.57    0.32
  -4   1  -5   -0.05    0.57
   5  -1   5    2.98    0.47
   5  -1   5    2.48    0.86
   5  -1   5    3.16    0.79
   5   1   5    5.14    1.01
  -5   1  -5    2.92    0.75
   5   1   5    3.27    0.45
   5   1   5    1.82    0.84
  -8  -2   5    0.89    0.77
   8  -2  -5    0.90    0.77
   8  -2  -5    1.92    0.72
  -8  -2   5    1.11    0.90
  -8   2   5    2.25    1.07
  -8   2   5    3.13    0.74
   8   2  -5    1.68    0.64
   8   2  -5    1.56    0.72
  -7  -2   5    6.08    1.13
  -7  -2   5    4.54    0.70
  -7  -2   5    3.39    0.74
   7  -2  -5    3.60    0.71
   7  -2  -5    4.52    0.81
  -7   2   5    3.69    0.87
   7   2  -5    3.09    0.59
   7   2  -5    3.66    0.66
   5  -2  -5   11.03    1.21
   5  -2  -5   11.06    0.95
  -5  -2   5   10.13    0.93
  -5  -2   5   11.07    1.00
  -5   2   5   10.65    1.08
   5   2  -5    9.42    1.10
   5   2  -5   10.37    0.92
  -4  -2   5   35.22    1.86
  -4  -2   5   35.09    2.25
  -4  -2   5   37.08    1.89
   4  -2  -5   38.00    2.25
  -4  -2   5   37.39    2.11
   4  -2  -5   37.17    1.91
  -4   2   5   34.32    1.91
   4   2  -5   33.81    2.18
   4   2  -5   34.04    1.87
  -3  -2   5    5.91    0.88
  -3  -2   5    5.13    0.87
   3  -2  -5    5.63    1.12
   3  -2  -5    5.19    0.78
  -3  -2   5    5.47    0.83
  -3  -2   5    5.71    0.96
   3   2  -5    4.86    0.79
  -3   2   5    5.40    0.83
  -3   2   5    3.68    1.10
   3   2  -5    4.21    0.61
  -2  -2   5   75.74    3.56
  -2  -2   5   76.32    4.02
  -2  -2   5   76.01    4.06
   2  -2  -5   71.03    3.52
   2  -2  -5   76.39    4.03
  -2  -2   5   75.10    3.53
  -2   2   5   85.13    4.15
   2   2  -5   77.78    3.57
   2   2  -5   71.69    4.03
  -2   2   5   76.78    3.55
  -1  -2   5  113.13    5.29
  -1  -2   5  116.51    5.34
   1  -2  -5  116.12    6.03
  -1  -2   5  122.43    6.06
   1  -2  -5  117.28    5.30
  -1  -2   5  118.95    6.05
  -1   2   5  113.80    5.29
  -1   2   5  129.46    6.09
   1   2  -5  117.54    5.34
  -1   2   5  108.74    5.29
   0  -2   5   21.46    1.60
   0  -2   5   20.29    1.42
   0  -2  -5   21.61    1.30
   0  -2   5   20.58    1.54
   0  -2   5   22.66    1.34
   0  -2  -5   20.14    1.54
   0   2   5   20.61    1.32
   0   2  -5   20.21    1.41
   0   2   5   21.88    1.26
   0   2   5   23.25    1.46
   0   2   5   23.43    1.61
   0   2  -5   23.36    1.39
   1  -2   5   61.18    3.15
   1  -2   5   62.43    3.55
  -1  -2  -5   67.85    3.08
   1  -2   5   62.68    3.53
   1  -2   5   64.52    3.07
   1   2   5   63.82    3.07
  -1   2  -5   60.41    3.14
   1   2   5   65.80    3.48
  -1   2  -5   65.89    3.13
   1   2   5   65.36    3.03
   1   2   5   73.63    3.54
  -2  -2  -5    2.77    0.53
   2  -2   5    1.68    0.81
   2  -2   5    2.50    0.65
   2  -2   5    2.38    0.64
   2  -2   5    2.49    0.51
   2   2   5    2.09    0.57
  -2   2  -5    2.39    0.62
   2   2   5    3.45    0.73
   2   2   5    2.70    0.42
   2   2   5    2.64    0.55
  -2   2  -5    2.65    0.61
   3  -2   5    6.19    1.14
   3  -2   5    6.09    1.05
   3  -2   5    4.73    0.74
   3  -2   5    5.64    0.75
  -3  -2  -5    5.79    0.79
  -3   2  -5    6.07    0.98
  -3   2  -5    6.26    0.89
   3   2   5    5.92    0.83
   3   2   5    6.91    0.87
   3   2   5    6.66    0.99
   3   2   5    6.46    0.62
   4  -2   5   10.27    1.36
  -4  -2  -5   12.11    0.95
   4  -2   5   12.07    1.33
   4  -2   5   11.43    1.14
   4  -2   5   10.19    0.90
  -4   2  -5   10.01    1.21
   4   2   5   10.85    0.78
   4   2   5   10.86    1.03
   4   2   5   10.14    1.22
   5  -2   5    2.97    0.92
   5  -2   5    2.91    0.85
   5  -2   5    2.44    0.47
   5  -2   5    3.28    0.67
   5   2   5    3.68    0.69
   5   2   5    2.45    0.57
  -5   2  -5    2.26    0.78
   5   2   5    2.16    0.41
  -8  -3   5   24.20    1.79
  -8  -3   5   20.57    1.80
   8  -3  -5   22.54    1.86
  -8  -3   5   21.67    1.46
   8  -3  -5   23.20    1.82
  -8   3   5   23.25    2.14
   8   3  -5   21.26    1.66
  -8   3   5   25.69    1.81
   7  -3  -5    8.65    1.21
  -7  -3   5    8.57    1.16
  -7  -3   5    7.45    0.83
   7  -3  -5   10.57    1.12
  -7  -3   5    7.61    1.00
   7   3  -5    8.25    1.00
  -7   3   5    7.44    1.15
  -7   3   5    7.83    1.36
   7   3  -5    7.29    0.93
  -6  -3   5   38.97    2.26
   6  -3  -5   40.49    2.47
   6  -3  -5   42.41    2.11
  -6  -3   5   38.10    2.06
  -6  -3   5   39.21    2.01
   6   3  -5   39.89    2.29
   6   3  -5   38.35    2.01
  -6   3   5   37.48    2.18
  -5  -3   5    5.00    0.79
   5  -3  -5    3.65    0.58
   5  -3  -5    5.61    0.94
  -5  -3   5    3.30    0.52
  -5  -3   5    4.09    0.79
  -5  -3   5    2.59    0.83
   5   3  -5    3.36    0.53
  -5   3   5    3.56    0.65
   5   3  -5    4.42    0.70
  -4  -3   5   17.74    1.19
   4  -3  -5   18.18    1.55
   4  -3  -5   18.41    1.25
  -4  -3   5   18.59    1.21
  -4  -3   5   17.53    1.30
  -4  -3   5   18.19    1.54
   4   3  -5   15.85    1.40
  -4   3   5   17.78    1.30
   4   3  -5   16.41    1.20
   3  -3  -5    1.73    0.51
  -3  -3   5    2.10    0.56
  -3  -3   5    1.50    0.55
   3  -3  -5    2.98    0.91
  -3  -3   5    2.13    0.85
  -3  -3   5    1.61    0.51
  -3   3   5    1.80    0.58
   3   3  -5    0.69    0.69
  -3   3   5    1.24    1.05
   3   3  -5    1.08    0.51
   2  -3  -5    4.53    0.60
  -2  -3   5    4.75    0.92
   2  -3  -5    6.45    1.10
  -2  -3   5    5.46    0.79
  -2  -3   5    4.00    0.63
  -2  -3   5    5.77    1.11
  -2   3   5    5.13    0.84
   2   3  -5    4.75    0.82
  -2   3   5    3.80    1.09
  -1  -3   5    9.24    1.07
  -1  -3   5    8.10    1.23
   1  -3  -5   10.78    0.95
   1  -3  -5   10.89    1.20
  -1  -3   5   10.97    1.01
  -1  -3   5    9.70    1.11
  -1   3   5   12.77    1.38
   1   3  -5    9.11    1.06
  -1   3   5   11.62    0.94
   0  -3   5    9.89    0.94
   0  -3  -5    9.02    0.88
   0  -3   5    9.24    1.23
   0  -3   5    7.43    1.08
   0  -3  -5    7.67    1.05
   0  -3   5    7.62    1.05
   0   3   5    8.01    0.89
   0   3  -5    9.66    1.02
   0   3   5    9.18    0.83
   0   3   5   11.66    1.22
   0   3  -5    7.50    1.05
   1  -3   5    5.54    0.77
   1  -3   5    6.19    0.88
   1  -3   5    5.63    1.11
   1  -3   5    5.93    1.07
  -1  -3  -5    5.82    0.81
  -1   3  -5    7.77    1.06
  -1   3  -5    7.38    1.01
   1   3   5    6.63    1.16
   1   3   5    5.71    0.74
   1   3   5    6.38    0.84
  -1   3  -5    5.59    0.77
   1   3   5    5.67    0.90
  -2  -3  -5    6.37    0.79
   2  -3   5    7.19    0.87
   2  -3   5    6.86    1.14
   2  -3   5    5.82    0.83
   2  -3   5    6.35    0.80
   2   3   5    6.03    0.85
   2   3   5    6.23    0.81
   2   3   5    6.25    0.67
  -2   3  -5    4.52    0.71
  -2   3  -5    7.22    0.98
   2   3   5    5.41    1.03
  -2   3  -5    8.05    0.99
   3  -3   5    2.21    0.49
   3  -3   5    2.66    0.78
  -3  -3  -5    1.06    0.42
   3  -3   5    1.60    0.62
   3  -3   5    1.67    0.64
   3   3   5    1.40    0.34
   3   3   5    0.65    0.66
  -3   3  -5    1.19    0.58
   3   3   5    1.27    0.47
   3   3   5    2.00    0.49
  -3   3  -5    1.09    0.58
   4  -3   5    0.81    0.56
   4  -3   5    0.89    0.88
   4  -3   5    0.99    0.43
  -4  -3  -5    1.38    0.45
   4  -3   5    1.06    0.77
   4   3   5    1.39    0.48
   4   3   5    0.37    0.32
  -4   3  -5    0.84    0.64
  -4   3  -5    1.27    0.58
   4   3   5   -0.23    0.72
   5  -3   5    1.02    0.46
   5  -3   5    1.32    0.90
   5  -3   5    1.70    1.03
   5  -3   5    1.74    0.65
   5   3   5    1.63    0.43
   5   3   5    2.92    0.64
   5   3   5    1.27    0.34
  -5   3  -5    1.27    0.83
  -8  -4   5    4.15    0.64
  -8  -4   5    1.85    0.82
   8  -4  -5    2.84    0.99
  -8   4   5    3.10    1.19
   7  -4  -5   15.51    1.43
  -7  -4   5   14.84    1.31
  -7  -4   5   17.92    1.10
  -7  -4   5   15.20    1.24
  -7   4   5   15.78    1.44
  -7   4   5   15.33    1.57
   7   4  -5   15.82    1.15
   6  -4  -5    7.47    1.05
  -6  -4   5    6.30    0.92
   6  -4  -5    9.41    1.28
  -6  -4   5    9.39    0.84
  -6  -4   5    7.78    0.96
   6   4  -5    8.56    0.89
  -6   4   5    6.96    1.19
   5  -4  -5    6.70    0.93
  -5  -4   5    6.42    0.78
   5  -4  -5    6.38    1.03
  -5  -4   5    4.78    0.82
  -5  -4   5    5.48    0.81
  -5   4   5    6.74    1.04
   5   4  -5    4.42    0.76
  -4  -4   5    2.55    0.52
   4  -4  -5    2.84    0.96
  -4  -4   5    2.30    0.55
  -4  -4   5    4.38    0.91
  -4  -4   5    2.09    0.58
   4  -4  -5    2.52    0.59
  -4   4   5    2.35    0.64
   4   4  -5    1.48    0.50
  -3  -4   5   18.22    1.44
  -3  -4   5   17.09    1.25
  -3  -4   5   17.60    1.17
  -3  -4   5   16.03    1.32
   3  -4  -5   18.06    1.16
   3  -4  -5   18.30    1.52
   3   4  -5   14.11    1.21
  -3   4   5   18.06    1.28
  -2  -4   5   38.21    2.20
   2  -4  -5   35.46    1.88
   2  -4  -5   38.22    2.16
  -2  -4   5   33.54    2.14
  -2  -4   5   36.00    1.93
  -2  -4   5   37.13    1.89
  -2   4   5   36.20    1.92
   2   4  -5   31.32    1.88
  -1  -4   5   35.29    2.24
  -1  -4   5   37.47    2.03
  -1  -4   5   37.91    1.98
   1  -4  -5   39.68    1.95
  -1  -4   5   38.78    2.32
   1  -4  -5   40.14    2.28
  -1   4   5   34.72    2.39
  -1   4   5   38.42    1.95
   1   4  -5   35.45    2.04
   1   4  -5   40.12    2.02
   0  -4   5   15.82    1.15
   0  -4   5   13.75    1.37
   0  -4  -5   15.70    1.07
   0  -4   5   14.20    1.32
   0  -4  -5   13.65    1.28
   0  -4   5   13.85    1.29
   0   4  -5   15.42    1.28
   0   4   5   15.20    1.05
   0   4   5   18.28    1.46
   0   4  -5   15.42    1.32
   0   4  -5   13.81    1.27
   0   4   5   14.02    1.08
   1  -4   5   42.93    2.60
   1  -4   5   44.70    2.23
   1  -4   5   39.89    2.31
  -1  -4  -5   40.45    2.47
  -1  -4  -5   44.44    2.15
   1  -4   5   40.02    2.59
   1   4   5   46.96    2.58
  -1   4  -5   41.53    2.32
  -1   4  -5   43.64    2.51
  -1   4  -5   45.42    2.27
   1   4   5   49.24    2.45
   1   4   5   40.71    2.11
   1   4   5   43.41    2.15
   2  -4   5    4.40    0.77
  -2  -4  -5    3.98    0.53
   2  -4   5    6.59    0.89
   2  -4   5    5.89    0.79
   2  -4   5    5.37    0.88
   2   4   5    3.88    0.79
   2   4   5    4.71    0.74
  -2   4  -5    5.79    0.90
   2   4   5    4.18    0.60
  -2   4  -5    4.75    0.70
   2   4   5    5.27    0.77
  -2   4  -5    5.68    0.95
   3  -4   5   13.14    1.02
   3  -4   5   12.59    1.33
   3  -4   5   11.31    1.34
  -3  -4  -5   10.93    0.89
   3  -4   5   10.59    1.20
   3   4   5   10.08    0.77
  -3   4  -5   12.52    1.13
   3   4   5   11.30    0.97
   3   4   5   11.49    0.91
  -3   4  -5   11.22    1.16
   4  -4   5    7.21    0.86
   4  -4   5    6.93    1.37
   4  -4   5    7.00    1.00
   4  -4   5    5.60    0.97
  -4  -4  -5    6.57    0.82
   4   4   5    6.89    0.82
  -4   4  -5    7.35    1.22
  -4   4  -5    5.81    0.94
   4   4   5    5.64    0.63
   4   4   5    7.29    0.85
   5  -4   5    4.09    0.59
   5  -4   5    5.39    1.22
   5  -4   5    6.57    1.07
   5  -4   5    3.98    1.02
  -5   4  -5    4.14    0.96
  -5   4  -5    3.24    0.68
   7  -5  -5    2.84    0.84
  -7  -5   5    2.48    0.58
   7  -5  -5    1.11    1.04
  -7  -5   5    2.84    0.49
  -7  -5   5    2.80    0.67
  -7   5   5    2.34    0.89
  -7   5   5    3.26    0.82
   7   5  -5    2.92    0.55
   6  -5  -5   13.05    1.24
  -6  -5   5   11.87    1.08
   6  -5  -5   12.93    1.44
  -6  -5   5   12.23    1.09
  -6  -5   5   13.53    0.98
   6   5  -5   13.13    1.02
  -6   5   5   12.78    1.37
  -5  -5   5   25.01    1.86
   5  -5  -5   28.44    1.99
  -5  -5   5   32.88    1.62
   5  -5  -5   31.54    1.71
  -5  -5   5   27.13    1.77
  -5  -5   5   30.17    1.60
  -5   5   5   29.16    1.78
   5   5  -5   29.50    1.60
   4  -5  -5   12.12    1.46
  -4  -5   5   14.80    1.04
  -4  -5   5   14.81    1.28
   4  -5  -5   15.09    1.18
  -4  -5   5   14.39    1.09
  -4  -5   5   12.28    1.13
   4   5  -5   12.77    1.06
  -4   5   5   13.81    1.23
   3  -5  -5   11.81    1.06
  -3  -5   5   11.31    1.00
  -3  -5   5    8.84    1.08
   3  -5  -5   12.18    1.36
  -3  -5   5   10.61    1.20
  -3  -5   5   10.71    1.05
  -3   5   5   11.18    1.15
   3   5  -5    8.02    0.98
   2  -5  -5   11.89    1.31
  -2  -5   5   10.56    1.22
  -2  -5   5   10.00    1.11
   2  -5  -5   10.76    0.98
  -2  -5   5   11.07    1.00
  -2  -5   5   10.55    1.14
  -2   5   5   10.88    1.09
   2   5  -5    8.63    1.01
   1  -5  -5   30.73    1.64
  -1  -5   5   28.34    1.93
  -1  -5   5   28.58    1.90
   1  -5  -5   31.42    1.93
  -1  -5   5   28.13    1.75
  -1  -5   5   29.18    1.68
   1   5  -5   27.72    1.73
   1   5  -5   31.30    1.86
   1   5  -5   30.72    1.75
  -1   5   5   29.13    1.62
   0  -5   5    8.06    1.01
   0  -5  -5    7.88    0.87
   0  -5   5    7.62    1.16
   0  -5  -5    8.44    1.10
   0  -5   5    7.58    1.28
   0  -5   5    8.04    0.89
   0   5   5    6.95    0.88
   0   5   5    8.09    0.87
   0   5  -5    7.98    1.04
   0   5  -5    6.48    1.04
   0   5  -5    8.27    1.09
  -1  -5  -5   11.51    0.93
   1  -5   5   12.48    1.06
  -1  -5  -5   10.24    1.15
   1  -5   5    9.57    1.31
   1  -5   5    9.99    1.24
   1  -5   5    8.96    1.29
   1   5   5   11.81    0.88
  -1   5  -5   11.72    1.13
  -1   5  -5   11.72    1.20
   1   5   5    8.05    1.29
   1   5   5   11.00    0.94
  -1   5  -5    7.50    1.19
   2  -5   5    8.20    0.98
   2  -5   5    7.25    1.18
  -2  -5  -5    8.83    0.78
   2  -5   5    7.26    1.18
  -2   5  -5    9.65    1.08
   2   5   5    8.84    0.81
  -2   5  -5    9.27    1.06
   2   5   5    9.19    0.86
   2   5   5    7.63    0.73
   3  -5   5    2.17    0.70
  -3  -5  -5    2.65    0.47
   3  -5   5    4.05    0.63
   3  -5   5    4.19    0.84
  -3   5  -5    3.64    0.70
   3   5   5    3.03    0.42
   3   5   5    4.01    0.73
  -3   5  -5    3.02    0.70
  -4  -5  -5    1.21    0.45
   4  -5   5    0.55    0.48
   4  -5   5    1.13    0.95
   4  -5   5    1.12    0.56
   4  -5   5    1.62    0.88
  -4   5  -5    1.65    0.60
   4   5   5    0.83    0.38
   4   5   5    0.48    0.44
  -4   5  -5    0.15    0.72
   5  -5   5    0.57    0.46
   5  -5   5    1.48    1.21
   5  -5   5    1.43    0.66
   5  -5   5    1.04    1.08
  -5   5  -5    0.83    0.58
   5   5   5   -0.47    0.54
   5   5   5    1.67    0.54
  -5   5  -5    0.92    0.93
  -7  -6   5   -0.90    0.61
  -7  -6   5   -0.09    0.41
  -7  -6   5   -0.39    0.75
  -7  -6   5    0.61    0.53
  -7   6   5    0.40    0.67
  -7   6   5    0.10    0.90
  -6  -6   5    1.77    0.57
   6  -6  -5    0.97    0.66
  -6  -6   5    1.26    0.41
   6  -6  -5    0.69    1.12
  -6  -6   5    1.36    0.55
   6   6  -5    1.21    0.47
  -6   6   5    1.03    0.76
  -6   6   5    2.03    0.81
  -5  -6   5    4.25    0.74
  -5  -6   5    6.29    1.07
  -5  -6   5    5.08    0.88
  -5  -6   5    5.88    0.85
   5  -6  -5    5.80    0.98
   5   6  -5    5.90    0.83
  -5   6   5    5.59    0.82
  -4  -6   5   14.21    1.19
  -4  -6   5   14.97    1.05
   4  -6  -5   15.45    1.17
  -4  -6   5   15.07    1.31
   4  -6  -5   12.67    1.39
  -4  -6   5   15.16    1.10
  -4   6   5   13.93    1.22
   4   6  -5   13.30    1.07
  -3  -6   5   21.49    1.36
  -3  -6   5   19.60    1.40
  -3  -6   5   20.57    1.55
   3  -6  -5   21.15    1.69
   3  -6  -5   23.30    1.37
  -3  -6   5   19.09    1.48
   3   6  -5   18.34    1.34
  -3   6   5   20.30    1.44
   2  -6  -5   28.52    1.58
   2  -6  -5   28.74    1.83
  -2  -6   5   28.70    1.60
  -2  -6   5   25.89    1.62
  -2  -6   5   28.00    1.86
  -2  -6   5   25.19    1.76
   2   6  -5   24.49    1.58
   2   6  -5   27.46    1.63
  -2   6   5   26.09    1.60
  -1  -6   5   12.89    1.28
   1  -6  -5   13.49    1.23
  -1  -6   5   13.16    1.29
  -1  -6   5   14.50    1.16
   1  -6  -5   12.89    1.04
  -1  -6   5   13.06    1.40
   1   6  -5   14.24    1.27
   1   6  -5   13.04    1.22
   1   6  -5   13.88    1.24
  -1   6   5   13.03    1.10
   0  -6   5   34.24    2.29
   0  -6   5   38.38    1.99
   0  -6   5   33.48    2.05
   0  -6   5   33.79    2.24
   0  -6  -5   36.58    1.85
   0  -6  -5   37.18    2.19
   0   6  -5   36.57    2.03
   0   6  -5   33.10    2.02
   0   6  -5   37.58    2.22
   0   6   5   35.26    1.87
   1  -6   5   43.97    2.30
   1  -6   5   38.72    2.46
  -1  -6  -5   40.85    2.36
  -1  -6  -5   38.58    2.02
   1  -6   5   43.09    2.16
   1   6   5   41.28    2.04
  -1   6  -5   42.65    2.23
   1   6   5   38.95    2.02
  -1   6  -5   40.96    2.44
  -1   6  -5   37.84    2.20
   2  -6   5    7.64    1.17
   2  -6   5    8.67    1.01
   2  -6   5   10.05    1.22
  -2  -6  -5    8.38    0.77
   2   6   5    9.12    0.80
   2   6   5    9.14    0.77
  -2   6  -5    9.73    1.10
   2   6   5    8.87    0.86
  -2   6  -5    9.39    1.16
  -3  -6  -5    2.72    0.45
   3  -6   5    4.02    0.67
   3  -6   5    3.35    0.75
   3  -6   5    4.33    0.86
  -3   6  -5    3.08    0.72
   3   6   5    3.63    0.44
  -3   6  -5    3.33    0.76
   3   6   5    3.41    0.52
   4  -6   5    6.52    1.06
   4  -6   5    5.39    1.04
   4  -6   5    5.83    0.99
  -4  -6  -5    8.07    0.83
  -4   6  -5    5.88    1.02
  -4   6  -5    6.03    0.93
   4   6   5    5.40    0.81
   5  -6   5    1.42    1.17
   5  -6   5    1.26    0.54
  -5   6  -5    1.83    1.09
  -5   6  -5    2.14    0.64
   5   6   5    2.26    0.45
   5   6   5    1.24    0.40
   7  -7  -5    0.75    1.15
   7  -7  -5    1.65    0.93
  -7  -7   5    2.60    0.70
  -7  -7   5    3.76    0.57
  -7   7   5    5.34    1.12
  -7   7   5    4.46    0.89
   6  -7  -5    4.35    0.81
  -6  -7   5    5.67    0.94
  -6  -7   5    3.86    0.63
   6  -7  -5    2.36    1.21
  -6   7   5    5.27    0.91
  -6   7   5    3.96    0.88
  -5  -7   5   46.92    2.72
  -5  -7   5   52.39    2.41
  -5  -7   5   44.54    2.73
   5  -7  -5   55.91    2.55
  -5  -7   5   47.61    2.41
  -5   7   5   46.01    2.57
   5   7  -5   47.22    2.41
  -4  -7   5    5.85    0.90
  -4  -7   5    5.80    0.85
  -4  -7   5    7.00    0.84
  -4  -7   5    6.67    1.02
   4  -7  -5    4.28    1.05
   4  -7  -5    5.52    0.96
   4   7  -5    6.36    0.85
  -4   7   5    6.17    1.04
  -3  -7   5   17.83    1.42
   3  -7  -5   18.43    1.66
   3  -7  -5   20.77    1.33
  -3  -7   5   19.73    1.28
  -3  -7   5   17.74    1.31
  -3  -7   5   18.84    1.49
  -3   7   5   18.87    1.38
   3   7  -5   18.95    1.29
  -2  -7   5   65.10    3.00
  -2  -7   5   61.83    3.45
   2  -7  -5   62.63    3.00
  -2  -7   5   59.73    3.44
  -2  -7   5   54.80    3.07
   2  -7  -5   67.59    3.46
   2   7  -5   63.06    3.39
   2   7  -5   60.33    3.04
   2   7  -5   64.80    3.05
  -2   7   5   60.96    3.06
  -1  -7   5   21.08    1.37
  -1  -7   5   16.93    1.47
  -1  -7   5   17.55    1.52
  -1  -7   5   16.44    1.58
   1  -7  -5   19.27    1.56
   1  -7  -5   18.89    1.27
   1   7  -5   18.76    1.41
   1   7  -5   22.15    1.52
  -1   7   5   19.25    1.31
   1   7  -5   20.12    1.37
   0  -7   5    2.79    0.72
   0  -7  -5    2.61    0.52
   0  -7   5    1.91    0.76
   0  -7  -5    3.19    0.85
   0  -7   5    3.10    0.67
   0   7  -5    2.67    0.75
   0   7  -5    2.88    0.69
   0   7   5    2.90    0.56
   0   7  -5    1.74    0.67
   1  -7   5    9.39    1.15
   1  -7   5   10.35    1.05
  -1  -7  -5    9.47    0.83
  -1  -7  -5    9.59    1.07
   1  -7   5    8.98    1.25
   1   7   5   10.75    0.88
  -1   7  -5    6.60    1.09
   1   7   5    8.65    0.85
  -1   7  -5   10.29    1.10
  -2  -7  -5    3.08    0.47
   2  -7   5    3.15    0.77
  -2  -7  -5    3.09    0.64
   2  -7   5    2.98    0.77
   2  -7   5    2.45    0.66
   2   7   5    2.29    0.43
   2   7   5    3.19    0.48
   2   7   5    4.19    0.71
  -2   7  -5    3.08    0.72
  -2   7  -5    3.24    0.74
  -3  -7  -5    2.44    0.44
   3  -7   5    3.26    0.93
   3  -7   5    2.24    0.64
   3  -7   5    2.34    0.75
   3   7   5    2.36    0.42
  -3   7  -5    2.11    0.79
   3   7   5    2.61    0.50
  -3   7  -5    2.28    0.74
   3   7   5    2.42    0.44
   4  -7   5    3.52    0.66
   4  -7   5    3.13    1.05
  -4   7  -5    4.59    0.99
   4   7   5    4.87    0.81
  -4   7  -5    3.41    0.77
   7  -8  -5   -1.14    0.99
  -7  -8   5    0.69    0.50
  -7  -8   5   -0.43    0.64
  -7  -8   5   -0.71    0.82
  -7   8   5    0.54    1.03
  -7   8   5    1.41    0.79
  -6  -8   5   17.20    1.29
  -6  -8   5   18.25    1.17
  -6  -8   5   17.80    1.38
   6  -8  -5   16.71    1.46
  -6   8   5   18.92    1.66
   6   8  -5   18.20    1.21
  -6   8   5   16.27    1.57
   5  -8  -5   20.87    1.37
   5  -8  -5   15.04    1.70
  -5  -8   5   19.44    1.25
  -5  -8   5   18.34    1.43
  -5  -8   5   17.68    1.20
  -5  -8   5   20.15    1.43
  -5   8   5   18.30    1.53
   5   8  -5   17.16    1.24
  -5   8   5   17.71    1.65
  -4  -8   5   13.94    1.07
  -4  -8   5   11.60    1.16
   4  -8  -5   12.85    1.09
  -4  -8   5   12.86    1.05
  -4  -8   5   12.72    1.18
  -4   8   5   12.05    1.26
   4   8  -5   12.01    1.06
  -3  -8   5   34.96    2.10
   3  -8  -5   29.43    2.14
  -3  -8   5   35.31    1.87
   3  -8  -5   36.33    1.88
  -3  -8   5   34.47    2.08
  -3  -8   5   35.79    1.83
   3   8  -5   34.01    1.85
  -3   8   5   28.72    1.89
  -2  -8   5   49.32    2.93
   2  -8  -5   54.10    2.99
  -2  -8   5   53.67    2.56
  -2  -8   5   47.85    2.92
  -2  -8   5   46.76    2.60
   2  -8  -5   54.07    2.56
   2   8  -5   48.27    2.59
   2   8  -5   51.49    2.59
   2   8  -5   53.15    2.88
  -2   8   5   50.04    2.58
   1  -8  -5   13.57    1.11
  -1  -8   5   14.68    1.31
   1  -8  -5   14.30    1.39
  -1  -8   5   12.56    1.43
  -1  -8   5   14.80    1.26
  -1  -8   5   13.42    1.39
   1   8  -5   15.48    1.28
   1   8  -5   10.85    1.24
  -1   8   5   14.25    1.16
   1   8  -5   15.05    1.28
   0  -8   5    5.79    0.97
   0  -8   5    5.15    0.80
   0  -8  -5    5.44    0.77
   0  -8  -5    5.53    1.08
   0  -8   5    4.14    0.85
   0   8  -5    5.26    0.74
   0   8  -5    5.62    0.77
   0   8  -5    5.04    0.83
   0   8   5    5.02    0.65
   1  -8   5   23.70    1.85
  -1  -8  -5   25.53    1.40
  -1  -8  -5   26.15    1.70
   1  -8   5   26.86    1.66
   1  -8   5   26.45    1.71
  -1   8  -5   26.24    1.62
  -1   8  -5   25.29    1.80
   1   8   5   25.81    1.45
   1   8   5   24.22    1.43
  -2  -8  -5    6.57    0.75
  -2  -8  -5    5.64    0.98
   2  -8   5    8.03    1.30
   2  -8   5    6.12    1.02
   2  -8   5    7.82    1.22
   2   8   5    7.73    0.78
  -2   8  -5    7.01    0.90
  -2   8  -5    6.57    1.11
   2   8   5    7.30    0.80
   3  -8   5    4.58    0.91
   3  -8   5    4.35    0.77
   3  -8   5    4.89    0.96
  -3  -8  -5    4.50    0.69
   3   8   5    4.17    0.66
   3   8   5    3.92    0.68
  -3   8  -5    4.91    0.88
  -3   8  -5    3.64    0.80
   3   8   5    4.34    0.73
   4  -8   5   11.63    1.92
   4  -8   5    8.66    1.18
   4  -8   5   10.83    1.23
  -4  -8  -5    8.84    0.90
   4   8   5    8.01    0.91
   4   8   5    6.32    1.02
  -4   8  -5    8.52    1.22
  -4   8  -5    8.17    1.15
  -7  -9   5    7.27    1.09
   7  -9  -5    5.31    1.26
  -7   9   5    9.62    1.36
  -7   9   5    6.98    1.23
  -6  -9   5   12.07    1.19
  -6  -9   5   14.94    1.06
  -6  -9   5   12.71    1.27
   6  -9  -5   11.91    1.44
  -6   9   5   13.00    1.57
  -6   9   5   12.14    1.48
  -5  -9   5   26.00    1.77
  -5  -9   5   24.77    1.71
  -5  -9   5   24.83    1.53
   5  -9  -5   25.46    1.67
  -5  -9   5   26.79    1.51
   5   9  -5   26.41    1.55
  -5   9   5   24.69    2.00
  -5   9   5   27.04    1.84
  -4  -9   5   18.93    1.52
  -4  -9   5   19.57    1.48
  -4  -9   5   20.72    1.35
  -4  -9   5   21.76    1.35
   4  -9  -5   20.99    1.43
   4   9  -5   20.04    1.35
  -4   9   5   19.93    1.48
  -3  -9   5    7.36    1.07
   3  -9  -5    6.92    0.96
  -3  -9   5    7.12    0.97
  -3  -9   5    6.99    1.05
  -3  -9   5    7.10    0.96
   3  -9  -5    4.33    1.07
   3   9  -5    6.72    0.94
  -3   9   5    5.12    0.79
  -2  -9   5   12.24    1.17
   2  -9  -5   12.40    1.43
   2  -9  -5   13.93    1.06
  -2  -9   5   14.53    1.20
  -2  -9   5   12.76    1.31
  -2  -9   5   13.16    1.24
   2   9  -5   14.25    1.29
   2   9  -5   13.99    1.16
  -2   9   5   12.16    1.21
   2   9  -5   12.77    1.14
   1  -9  -5    3.72    0.58
  -1  -9   5    3.30    0.66
   1  -9  -5    4.28    0.92
  -1  -9   5    3.77    0.80
  -1  -9   5    3.81    0.84
  -1  -9   5    3.71    0.74
   1   9  -5    4.42    0.69
   1   9  -5    3.99    0.77
  -1   9   5    4.17    0.67
   0  -9  -5    1.41    0.80
   0  -9   5    0.71    0.64
   0  -9  -5    0.30    0.42
   0  -9   5    0.56    0.60
   0  -9   5    0.89    0.70
   0   9  -5    1.71    0.64
   0   9  -5    0.74    0.66
   0   9   5    1.27    0.52
   0   9   5   -0.39    0.68
  -1  -9  -5    8.62    0.83
   1  -9   5    9.03    1.30
   1  -9   5    9.27    1.25
  -1  -9  -5    8.68    1.07
   1  -9   5    8.42    1.19
  -1   9  -5    8.47    1.12
  -1   9  -5    6.92    1.22
   1   9   5    7.78    0.89
   2  -9   5    1.27    0.75
   2  -9   5    1.45    0.69
  -2  -9  -5    0.22    0.64
   2  -9   5    0.80    0.80
  -2  -9  -5    0.47    0.41
  -2   9  -5   -0.15    0.70
   2   9   5    0.58    0.44
   2   9   5   -0.79    0.62
   2   9   5    0.51    0.44
  -2   9  -5   -0.20    0.73
  -3  -9  -5    4.15    0.70
   3  -9   5    5.82    1.14
   3  -9   5    4.89    1.06
   3  -9   5    4.39    0.80
   3   9   5    4.85    0.68
   3   9   5    4.90    0.77
  -3   9  -5    4.10    0.87
  -3   9  -5    3.99    0.84
   3   9   5    5.27    0.63
   4  -9   5    1.78    0.70
  -4  -9  -5    2.47    0.52
   4  -9   5    3.26    1.25
  -4   9  -5    1.71    0.74
   4   9   5    3.09    0.55
  -4   9  -5    1.20    0.99
   4   9   5    2.41    0.63
  -6 -10   5    4.40    0.80
  -6 -10   5    2.98    0.67
   6 -10  -5    1.43    0.88
  -6 -10   5    6.24    0.87
  -6  10   5    3.97    0.95
  -6  10   5    6.83    1.05
  -5 -10   5   15.17    1.44
  -5 -10   5   15.98    1.33
  -5 -10   5   15.91    1.25
  -5 -10   5   17.07    1.15
   5 -10  -5   14.01    1.38
  -5  10   5   17.08    1.52
  -5  10   5   15.86    1.66
   4 -10  -5    0.09    1.00
  -4 -10   5    0.32    0.64
  -4 -10   5    0.88    0.58
   4 -10  -5    0.12    0.62
  -4 -10   5    0.63    0.47
  -4 -10   5    1.07    0.67
  -4  10   5   -0.11    0.80
  -4  10   5    0.52    0.68
   3 -10  -5   13.39    1.17
  -3 -10   5   12.36    1.32
  -3 -10   5   14.26    1.15
  -3 -10   5   12.83    1.31
  -3 -10   5   14.88    1.18
   3  10  -5   14.20    1.14
   3  10  -5   12.66    1.27
  -3  10   5   11.82    1.32
  -2 -10   5    0.26    0.57
  -2 -10   5   -0.07    0.73
  -2 -10   5   -0.14    0.57
  -2 -10   5    0.16    0.65
   2 -10  -5    0.05    0.53
   2 -10  -5    0.08    0.93
   2  10  -5   -0.40    0.54
  -2  10   5   -0.23    0.76
  -2  10   5   -0.12    0.59
   2  10  -5    1.07    0.65
  -1 -10   5    2.26    0.68
  -1 -10   5    2.40    0.78
   1 -10  -5    2.29    0.89
   1 -10  -5    1.97    0.55
  -1 -10   5    2.75    0.68
  -1  10   5    2.12    0.60
   1  10  -5    2.82    0.78
   1  10  -5    2.31    0.65
   0 -10  -5   -0.13    0.82
   0 -10   5    0.26    0.67
   0 -10   5   -0.04    0.63
   0 -10   5    0.16    0.64
   0 -10  -5    0.31    0.47
   0  10   5    0.05    0.76
   0  10  -5   -0.32    0.66
   0  10   5    0.79    0.53
   0  10  -5    0.46    0.63
  -1 -10  -5    9.25    1.16
   1 -10   5    7.98    1.25
   1 -10   5   11.44    1.37
  -1 -10  -5   10.19    0.90
   1 -10   5    9.32    1.33
  -1  10  -5    9.03    1.26
   1  10   5    9.95    0.99
  -1  10  -5   10.81    1.34
   2 -10   5    8.45    1.45
   2 -10   5    5.97    0.98
   2 -10   5    6.89    1.14
  -2 -10  -5    6.40    0.77
  -2 -10  -5    6.88    0.88
   2  10   5    7.28    0.89
  -2  10  -5    5.77    0.90
   2  10   5    6.33    0.81
  -2  10  -5    8.20    1.18
   3 -10   5    0.77    0.71
   3 -10   5    1.08    1.01
  -3 -10  -5    0.27    0.43
   3 -10   5    2.50    0.73
  -3  10  -5   -0.37    0.82
   3  10   5    1.41    0.40
   3  10   5    0.80    0.51
  -3  10  -5    1.32    0.73
   3  10   5    1.17    0.35
   4 -10   5   11.00    1.33
   4 -10   5   10.07    1.57
  -4 -10  -5   10.23    0.98
  -4  10  -5    9.82    1.31
  -4  10  -5    8.96    1.35
   4  10   5    9.95    1.01
   6 -11  -5    9.56    1.25
  -6 -11   5   13.44    1.47
  -6 -11   5   11.66    1.27
  -6 -11   5   14.98    1.23
  -6  11   5   14.24    1.64
  -6  11   5   14.59    1.62
   5 -11  -5   18.29    1.48
  -5 -11   5   18.06    1.46
  -5 -11   5   20.96    1.43
  -5 -11   5   19.91    1.65
  -5 -11   5   20.23    1.31
  -5  11   5   19.81    1.79
  -5  11   5   20.18    1.63
  -4 -11   5   12.87    1.41
  -4 -11   5   12.84    1.24
  -4 -11   5   11.94    1.23
  -4 -11   5   13.49    1.11
   4 -11  -5   13.33    1.26
  -4  11   5   13.63    1.37
  -4  11   5   12.82    1.57
  -3 -11   5   14.92    1.24
  -3 -11   5   13.64    1.35
   3 -11  -5   14.97    1.27
  -3 -11   5   15.29    1.30
  -3 -11   5   13.57    1.44
  -3  11   5   12.24    1.60
   3  11  -5   13.93    1.37
  -3  11   5   13.66    1.37
   3  11  -5   14.28    1.18
  -2 -11   5   15.12    1.51
  -2 -11   5   16.30    1.34
  -2 -11   5   14.11    1.45
   2 -11  -5   16.19    1.27
  -2 -11   5   15.72    1.33
  -2  11   5   15.91    1.39
   2  11  -5   16.25    1.27
   2  11  -5   16.71    1.42
  -2  11   5   17.39    1.62
  -1 -11   5    3.45    0.85
  -1 -11   5    3.07    0.74
   1 -11  -5    2.38    0.97
   1 -11  -5    2.99    0.59
  -1 -11   5    3.10    0.73
   1  11  -5    3.03    0.70
   1  11  -5    3.22    0.82
  -1  11   5    2.32    0.65
   0 -11   5    2.97    0.75
   0 -11  -5    1.82    0.93
   0 -11  -5    1.28    0.50
   0 -11   5    1.69    0.71
   0 -11   5    3.08    0.84
   0  11   5    1.56    0.56
   0  11  -5    1.76    0.76
   0  11  -5    2.08    0.70
   1 -11   5    1.44    0.75
  -1 -11  -5    1.71    0.88
   1 -11   5    2.13    0.79
   1 -11   5    2.14    0.81
  -1 -11  -5    1.88    0.49
  -1  11  -5    1.55    0.74
   1  11   5    2.09    0.58
   1  11   5    0.97    0.80
  -1  11  -5    2.02    0.81
  -2 -11  -5    0.88    0.45
   2 -11   5    1.23    0.71
   2 -11   5    2.34    0.83
   2 -11   5    1.75    0.75
  -2 -11  -5    1.31    0.77
   2  11   5    2.18    0.53
  -2  11  -5    2.18    0.81
  -2  11  -5   -0.66    0.77
   2  11   5    1.24    0.75
   3 -11   5    5.50    1.19
   3 -11   5    6.35    0.93
  -3 -11  -5    4.79    0.61
   3 -11   5    6.79    1.02
  -3  11  -5    5.45    1.01
   3  11   5    6.19    0.64
  -3  11  -5    7.56    1.30
   3  11   5    5.58    0.55
   3  11   5    4.87    0.69
  -6  12   5    1.11    0.92
  -6  12   5    2.78    0.87
  -5 -12   5    1.64    0.67
   5 -12  -5    0.43    0.77
  -5 -12   5    1.85    0.69
  -5 -12   5    2.48    0.89
  -5  12   5    1.87    0.76
  -5  12   5    1.84    0.85
  -4 -12   5   13.44    1.09
  -4 -12   5   11.57    1.31
  -4 -12   5   10.03    1.20
  -4 -12   5   12.32    1.52
   4 -12  -5   12.58    1.24
  -4  12   5   14.49    1.34
  -4  12   5   14.42    1.59
   3 -12  -5    8.77    1.17
  -3 -12   5   11.52    1.45
  -3 -12   5   10.61    1.11
  -3 -12   5   10.04    1.23
  -3 -12   5   11.75    1.27
   3  12  -5   10.40    1.09
   3  12  -5   10.01    1.32
  -3  12   5   10.69    1.48
  -3  12   5    9.71    1.29
  -2 -12   5    1.57    0.71
   2 -12  -5    0.28    0.99
  -2 -12   5    2.18    0.80
  -2 -12   5    1.56    0.86
  -2 -12   5    1.33    0.61
   2 -12  -5    1.00    0.62
   2  12  -5    2.17    0.79
  -2  12   5    1.86    0.69
  -2  12   5    1.67    0.89
   2  12  -5    1.30    0.64
   1 -12  -5    2.83    0.61
  -1 -12   5    3.65    0.74
  -1 -12   5    2.79    0.76
  -1 -12   5    2.82    0.85
   1 -12  -5    0.57    1.02
   1  12  -5    3.39    0.70
   1  12  -5    2.58    0.82
  -1  12   5    2.67    0.69
  -1  12   5    1.82    0.90
   0 -12   5    0.13    0.77
   0 -12  -5   -0.53    0.44
   0 -12  -5   -1.49    0.93
   0 -12   5    0.44    0.65
   0 -12   5    0.50    0.72
   0  12  -5   -0.35    0.76
   0  12  -5   -0.28    0.65
   0  12   5   -0.16    0.80
   0  12   5   -0.39    0.56
   1 -12   5   18.23    1.60
  -1 -12  -5   15.88    1.53
  -1 -12  -5   16.42    1.15
   1 -12   5   16.81    1.60
   1 -12   5   17.72    1.45
  -1  12  -5   16.76    1.54
   1  12   5   18.00    1.26
   1  12   5   16.68    1.67
  -1  12  -5   16.54    1.62
   2 -12   5   13.28    1.33
   2 -12   5   12.09    1.36
  -2 -12  -5   10.64    1.36
  -2 -12  -5    8.72    0.95
   2 -12   5   12.68    1.60
   2  12   5   12.16    1.10
  -2  12  -5    8.84    1.11
   2  12   5   11.21    1.50
  -2  12  -5   11.71    1.39
  -3 -12  -5   -1.09    0.54
   3 -12   5    1.03    1.21
   3 -12   5    1.01    0.75
  -3  12  -5    0.50    0.77
   3  12   5   -0.43    0.58
  -3  12  -5   -1.42    0.90
  -5 -13   5   14.31    1.21
  -5 -13   5   12.16    1.72
   5 -13  -5   11.45    1.36
  -5 -13   5   13.32    1.48
  -5  13   5   13.03    1.41
  -5  13   5   13.22    1.54
  -4 -13   5    3.10    0.80
  -4 -13   5    3.10    0.70
  -4 -13   5    3.24    0.95
   4 -13  -5    2.92    0.72
  -4  13   5    2.89    0.80
  -4  13   5    3.34    0.96
  -3 -13   5    8.15    1.21
  -3 -13   5    7.09    1.12
  -3 -13   5    8.26    1.31
  -3 -13   5    9.48    1.04
  -3  13   5    8.07    1.24
  -3  13   5    7.87    1.46
   3  13  -5    7.13    1.35
   3  13  -5    7.38    1.02
   2 -13  -5    7.67    1.15
  -2 -13   5    7.87    1.29
  -2 -13   5   10.90    1.18
  -2 -13   5   10.19    1.58
  -2 -13   5   10.23    1.40
   2  13  -5    7.88    1.09
  -2  13   5    9.95    1.47
  -2  13   5    9.35    1.23
   2  13  -5    8.87    1.42
   1 -13  -5    0.10    0.56
  -1 -13   5    1.13    0.90
   1 -13  -5   -1.38    1.02
  -1 -13   5    0.84    0.66
  -1 -13   5    0.42    0.75
   1  13  -5    0.58    0.66
   1  13  -5   -0.33    0.82
  -1  13   5    0.88    0.96
  -1  13   5    0.41    0.63
   0 -13   5    2.23    0.73
   0 -13  -5   -0.40    1.07
   0 -13   5    1.65    0.85
   0 -13   5    1.51    0.77
   0 -13  -5    0.63    0.49
   0  13  -5    1.60    0.72
   0  13   5    1.15    0.91
   0  13   5    1.40    0.58
   0  13  -5    1.61    0.84
  -1 -13  -5    3.85    1.12
   1 -13   5    4.00    0.86
  -1 -13  -5    2.21    0.50
   1 -13   5    2.45    0.78
   1  13   5    2.14    0.59
   1  13   5    4.25    1.05
  -1  13  -5    2.17    0.78
  -1  13  -5    3.60    0.91
  -2 -13  -5   -0.64    0.50
   2 -13   5    1.96    0.78
   2 -13   5    0.57    0.74
   2 -13   5    1.21    0.89
  -2 -13  -5   -0.29    0.93
   2  13   5    0.89    0.62
  -2  13  -5   -0.16    0.80
   2  13   5    0.67    0.96
   4 -14  -5   -0.96    0.63
  -4 -14   5    1.42    1.03
  -4 -14   5    0.30    0.87
  -4 -14   5   -0.21    0.65
  -4  14   5    1.46    0.94
  -4  14   5    1.29    0.74
  -3 -14   5   10.71    1.27
  -3 -14   5   11.33    1.53
  -3 -14   5   10.91    1.73
   3 -14  -5    9.48    1.21
  -3  14   5    9.72    1.30
  -3  14   5    9.96    1.72
   3  14  -5   10.02    1.12
   3  14  -5   10.67    1.57
  -2 -14   5    2.39    1.03
   2 -14  -5    0.54    0.66
  -2 -14   5    2.32    0.86
  -2  14   5    2.51    1.11
  -2  14   5    2.50    0.72
   2  14  -5    1.57    0.66
   2  14  -5    1.22    0.93
  -1 -14   5    1.46    0.64
  -1 -14   5    1.53    0.99
   1 -14  -5   -0.06    0.56
   1 -14  -5   -2.22    1.17
  -1 -14   5    0.12    0.83
   1  14  -5    0.57    0.86
   1  14  -5    1.22    0.70
  -1  14   5    0.92    1.04
  -1  14   5    0.17    0.57
   0 -14   5    1.35    0.69
   0 -14   5    1.71    0.85
   0 -14  -5   -0.77    1.17
   0 -14   5    2.85    0.95
   0  14  -5    2.49    0.79
   0  14  -5    2.14    0.89
   0  14   5    1.71    1.09
   1 -14   5    2.84    0.88
   1 -14   5    0.84    0.83
  -1 -14  -5   -0.17    1.18
   1 -14   5    1.11    0.77
  -1  14  -5    1.44    0.89
  -1  14  -5   -0.03    0.72
   1  14   5    1.56    1.12
   1  14   5    1.72    0.63
   2 -14   5    5.58    0.94
  -2 -14  -5    4.44    0.73
  -2  14  -5    7.19    1.10
  -2  14  -5    4.37    0.97
   2  14   5    7.86    1.15
  -4 -15   5    6.50    1.13
  -4 -15   5    4.65    0.82
  -4  15   5    7.55    1.29
  -3 -15   5    4.13    1.06
  -3 -15   5    4.73    1.23
   3  15  -5    3.49    0.67
   3  15  -5    3.24    1.08
  -3  15   5    4.53    1.27
  -3  15   5    2.75    0.79
  -2 -15   5   11.42    1.73
  -2 -15   5   13.83    2.02
   2  15  -5   11.21    1.23
  -2  15   5   10.66    1.26
  -2  15   5   13.26    2.02
   2  15  -5    9.31    1.74
   1 -15  -5   -1.98    1.36
   1 -15  -5   -0.74    0.58
  -1 -15   5    2.31    0.72
  -1 -15   5    0.59    0.94
  -1 -15   5    3.08    1.16
  -1  15   5    1.73    0.63
  -1  15   5    0.64    1.21
   1  15  -5    0.80    1.02
   1  15  -5    1.48    0.73
   0 -15  -5    0.22    0.53
   0 -15   5    3.88    1.17
   0 -15   5    1.77    0.93
   0  15   5    2.08    1.30
   0  15  -5    1.49    0.79
   0  15  -5    1.78    0.99
   0  15   5    0.52    0.59
   1 -15   5    1.88    0.90
   1 -15   5    2.27    1.11
  -1  15  -5    1.15    0.99
   1  15   5    2.53    0.75
   1  15   5    2.43    1.33
  -2 -16   5    3.43    1.39
  -2 -16   5    3.36    1.21
   2  16  -5    1.91    1.31
  -2  16   5    3.24    0.79
  -2  16   5    3.39    1.45
   2  16  -5    4.28    0.78
  -1 -16   5    2.97    1.50
   1 -16  -5   -2.36    1.61
  -1 -16   5    2.08    1.14
   1  16  -5    0.76    1.20
  -1  16   5    0.82    0.64
  -1  16   5    2.62    1.44
   1  16  -5    2.26    0.78
  -8   0   6    5.66    1.14
  -7   0   6    2.41    0.86
   7   0  -6    0.63    0.61
  -7   0   6    0.34    0.77
   7   0  -6    0.94    0.71
   6   0  -6   57.65    3.19
  -6   0   6   51.78    2.82
   6   0  -6   57.40    2.80
   5   0  -6   37.44    1.99
  -5   0   6   36.97    2.01
   5   0  -6   37.19    2.30
   4   0  -6   17.46    1.21
  -4   0   6   18.84    1.69
  -4   0   6   17.21    1.21
   4   0  -6   16.13    1.48
   3   0  -6   23.22    1.47
  -3   0   6   24.75    1.50
  -3   0   6   28.20    1.95
  -3   0   6   23.50    1.52
   3   0  -6   22.22    1.80
  -2   0   6  144.93    6.86
  -2   0   6  148.69    6.84
   2   0  -6  145.61    7.80
  -2   0   6  167.52    7.83
  -2   0   6  155.87    7.78
   2   0  -6  149.93    6.86
  -1   0   6   12.87    1.41
   1   0  -6    8.72    1.28
  -1   0   6   13.30    1.02
  -1   0   6   12.34    1.25
  -1   0   6   11.99    1.10
   1   0  -6   11.30    1.14
   0   0  -6   29.13    1.87
   0   0   6   38.37    2.20
   0   0   6   30.45    2.09
   0   0   6   33.93    1.88
   0   0   6   35.57    1.81
   1   0   6   47.13    2.54
  -1   0  -6   52.43    2.64
   1   0   6   53.82    2.68
   1   0   6   57.21    3.02
   1   0   6   55.10    3.00
   2   0   6   11.79    1.15
   2   0   6   11.89    1.28
  -2   0  -6   10.95    1.09
   2   0   6   11.24    1.16
   2   0   6   12.23    0.92
   3   0   6    2.27    0.71
   3   0   6    2.26    0.84
  -3   0  -6    1.92    0.56
   3   0   6    1.81    0.43
   3   0   6    2.34    0.62
   4   0   6    0.81    0.56
   4   0   6    1.03    0.78
   4   0   6   -0.49    0.35
   4   0   6   -0.70    0.84
  -8  -1   6    0.64    1.04
   8   1  -6    0.21    0.66
  -8   1   6    0.95    1.11
  -8   1   6    1.80    0.78
   7  -1  -6    3.68    0.80
  -7  -1   6    2.72    0.82
   7  -1  -6    4.24    0.79
  -7  -1   6    1.65    0.86
   7   1  -6    2.88    0.71
   7   1  -6    4.46    0.76
  -7   1   6    3.22    0.88
  -6  -1   6   13.50    1.32
   6  -1  -6   15.36    1.28
   6  -1  -6   17.26    1.44
   6   1  -6   15.30    1.39
   6   1  -6   15.38    1.28
  -6   1   6   14.99    1.34
   5  -1  -6   25.11    1.75
  -5  -1   6   24.54    1.44
   5  -1  -6   23.36    1.45
  -5  -1   6   23.28    1.49
  -5   1   6   23.81    1.52
   5   1  -6   23.14    1.71
   5   1  -6   23.81    1.48
  -4  -1   6    7.08    1.18
  -4  -1   6    6.40    0.86
  -4  -1   6    6.85    0.96
  -4  -1   6    5.28    0.67
   4  -1  -6    6.09    1.15
   4  -1  -6    4.46    0.65
  -4   1   6    4.49    0.67
   4   1  -6    5.33    1.01
   4   1  -6    5.33    0.93
  -3  -1   6   60.19    3.28
   3  -1  -6   57.49    2.90
  -3  -1   6   59.97    2.89
  -3  -1   6   59.26    2.92
  -3  -1   6   64.46    3.41
   3  -1  -6   58.76    3.32
  -3   1   6   57.68    2.91
   3   1  -6   57.96    2.91
   3   1  -6   54.68    3.35
  -3   1   6   63.83    3.47
  -2  -1   6   59.16    3.35
   2  -1  -6   62.72    2.98
  -2  -1   6   60.79    2.93
  -2  -1   6   67.80    3.43
  -2  -1   6   60.41    2.99
   2  -1  -6   57.42    3.41
  -2   1   6   60.65    2.95
  -2   1   6   57.83    2.97
   2   1  -6   54.36    3.36
  -2   1   6   67.89    3.49
   2   1  -6   60.05    2.96
  -1  -1   6   36.25    1.91
  -1  -1   6   38.16    2.25
  -1  -1   6   34.96    1.96
   1  -1  -6   31.26    2.21
  -1  -1   6   36.94    2.21
   1  -1  -6   37.12    1.95
  -1   1   6   35.24    1.91
   1   1  -6   35.88    1.95
  -1   1   6   38.05    2.32
  -1   1   6   36.70    2.18
  -1   1   6   32.50    1.90
   0  -1   6   35.18    1.79
   0  -1   6   28.92    2.11
   0  -1  -6   31.77    1.86
   0  -1   6   38.19    2.20
   0  -1   6   35.26    1.92
   0   1  -6   29.88    1.91
   0   1   6   33.30    1.89
   0   1   6   35.92    1.79
   0   1   6   31.41    2.09
   0   1   6   37.60    2.19
   1  -1   6   52.82    2.49
   1  -1   6   50.71    2.89
   1  -1   6   50.74    2.59
   1  -1   6   53.97    2.91
  -1  -1  -6   50.01    2.53
  -1   1  -6   48.71    2.56
   1   1   6   50.80    2.55
   1   1   6   55.38    2.92
   1   1   6   50.41    2.86
   1   1   6   44.04    2.44
   2  -1   6   12.17    1.20
  -2  -1  -6   11.30    1.06
   2  -1   6   12.77    0.94
   2  -1   6   11.18    1.32
   2  -1   6   10.94    1.19
  -2   1  -6   10.12    1.09
   2   1   6   11.66    0.88
   2   1   6   10.65    1.12
   2   1   6   10.18    1.11
   2   1   6   11.72    1.34
   3  -1   6   16.69    1.37
  -3  -1  -6   17.78    1.23
   3  -1   6   17.12    1.60
   3  -1   6   17.54    1.53
   3  -1   6   17.47    1.11
   3   1   6   17.63    1.42
   3   1   6   17.02    1.34
  -3   1  -6   15.41    1.24
  -3   1  -6   18.60    1.42
   3   1   6   17.33    1.56
   3   1   6   17.74    1.07
   4  -1   6    6.48    1.01
   4  -1   6    6.23    0.95
   4  -1   6    3.87    1.01
   4  -1   6    5.16    0.71
   4   1   6    5.66    0.71
  -4   1  -6    4.86    0.87
   4   1   6    8.68    1.29
   4   1   6    6.19    0.98
   8  -2  -6   10.38    1.69
  -8  -2   6   10.10    1.76
  -8   2   6   10.94    1.38
  -8   2   6   11.31    1.91
   8   2  -6   10.49    1.29
  -7  -2   6    2.09    0.76
   7  -2  -6    2.56    0.80
  -7  -2   6    1.51    0.45
  -7  -2   6    1.50    0.69
   7  -2  -6    3.13    0.78
   7   2  -6    1.46    0.65
   7   2  -6    1.33    0.59
  -7   2   6    2.71    0.88
   6  -2  -6    7.44    1.18
  -6  -2   6    5.99    0.87
  -6  -2   6    7.62    1.07
   6  -2  -6    6.43    1.07
  -6  -2   6    5.97    0.79
   6   2  -6    6.68    1.06
  -6   2   6    6.57    0.89
   6   2  -6    6.33    1.00
  -5  -2   6   34.19    1.85
  -5  -2   6   33.03    1.85
   5  -2  -6   33.36    1.84
  -5  -2   6   33.37    2.05
   5  -2  -6   34.64    2.17
  -5   2   6   34.03    1.95
   5   2  -6   34.10    1.85
   5   2  -6   33.51    2.13
  -4  -2   6   -0.16    0.83
  -4  -2   6    0.53    0.51
  -4  -2   6    0.21    0.51
   4  -2  -6    0.90    0.74
   4  -2  -6    0.19    0.50
  -4  -2   6    0.60    0.50
  -4   2   6   -0.05    1.02
   4   2  -6   -0.34    0.47
  -4   2   6    0.06    0.54
   4   2  -6    0.48    0.65
   3  -2  -6    2.05    0.87
  -3  -2   6    0.92    0.60
  -3  -2   6    2.58    0.94
  -3  -2   6    1.73    0.60
   3  -2  -6    1.54    0.58
  -3  -2   6    1.82    0.55
  -3   2   6    1.03    0.58
  -3   2   6    2.34    1.24
   3   2  -6    1.43    0.59
   3   2  -6    1.08    0.72
   2  -2  -6   83.85    3.93
  -2  -2   6   84.90    4.46
  -2  -2   6   80.82    3.90
  -2  -2   6   89.47    4.50
  -2  -2   6   82.10    3.97
   2  -2  -6   82.95    4.50
  -2   2   6   80.19    3.91
  -2   2   6   78.48    3.90
   2   2  -6   83.63    3.97
  -2   2   6   92.29    4.59
   1  -2  -6   16.38    1.26
  -1  -2   6   18.53    1.27
   1  -2  -6   14.91    1.49
  -1  -2   6   17.80    1.42
  -1  -2   6   18.27    1.48
  -1  -2   6   17.38    1.32
  -1   2   6   15.61    1.16
   1   2  -6   15.86    1.29
  -1   2   6   19.34    1.39
  -1   2   6   20.83    1.65
  -1   2   6   15.87    1.25
   0  -2   6    5.85    0.85
   0  -2   6    6.51    0.85
   0  -2  -6    5.14    0.82
   0  -2  -6    4.58    0.66
   0  -2   6    6.18    0.95
   0  -2   6    5.46    0.78
   0   2   6    5.06    0.78
   0   2   6    6.94    1.03
   0   2   6    4.20    0.66
   0   2   6    3.97    0.77
   0   2  -6    4.96    0.75
   1  -2   6   20.06    1.44
   1  -2   6   20.01    1.57
  -1  -2  -6   21.31    1.36
   1  -2   6   21.02    1.62
   1  -2   6   23.52    1.36
  -1   2  -6   24.13    1.48
   1   2   6   22.25    1.40
   1   2   6   17.99    1.25
  -1   2  -6   21.47    1.49
   1   2   6   21.91    1.49
   1   2   6   23.65    1.66
   2  -2   6    8.98    0.88
  -2  -2  -6    7.68    0.92
   2  -2   6   10.47    1.17
   2  -2   6    9.20    1.27
   2  -2   6    8.68    1.09
   2   2   6   10.20    0.81
   2   2   6    8.32    1.24
   2   2   6    7.59    1.00
  -2   2  -6    9.43    1.07
  -2   2  -6   10.22    1.14
   2   2   6    8.86    1.03
   3  -2   6    1.57    0.45
   3  -2   6    1.34    0.86
   3  -2   6    1.39    0.61
  -3  -2  -6    1.10    0.49
   3  -2   6    2.45    0.81
   3   2   6    1.82    0.66
   3   2   6    1.23    0.77
   3   2   6    1.23    0.39
  -3   2  -6    1.62    0.55
   3   2   6    1.20    0.57
  -3   2  -6    1.39    0.71
   4  -2   6    1.85    0.61
   4  -2   6    0.71    0.98
   4  -2   6    0.00    0.38
   4  -2   6    1.56    0.91
   4   2   6    1.13    0.70
   4   2   6   -0.02    0.55
  -4   2  -6   -0.37    0.79
   4   2   6   -0.12    0.85
   7  -3  -6    7.71    1.30
  -7  -3   6    9.11    0.90
   7  -3  -6    8.01    1.22
  -7  -3   6    7.86    1.22
  -7  -3   6    6.93    0.92
   7   3  -6    9.30    1.15
   7   3  -6   10.26    1.09
  -7   3   6    8.61    1.13
   6  -3  -6    4.28    0.85
  -6  -3   6    2.58    0.66
   6  -3  -6    2.26    0.66
  -6  -3   6    1.83    0.62
  -6  -3   6    2.54    0.53
  -6   3   6    2.57    0.75
   6   3  -6    3.03    0.65
  -6   3   6    0.38    0.91
   6   3  -6    2.43    0.63
  -5  -3   6   14.97    1.10
  -5  -3   6   14.62    1.21
  -5  -3   6   13.07    1.43
  -5  -3   6   13.43    1.14
   5  -3  -6   13.80    1.16
   5  -3  -6   12.73    1.37
   5   3  -6   12.19    1.27
  -5   3   6   12.50    1.18
   5   3  -6   12.89    1.11
  -4  -3   6    4.31    0.97
  -4  -3   6    2.50    0.56
   4  -3  -6    4.26    0.91
  -4  -3   6    3.24    0.59
   4  -3  -6    2.25    0.56
  -4  -3   6    2.98    0.63
   4   3  -6    2.63    0.58
  -4   3   6    0.83    0.97
  -4   3   6    2.59    0.63
   4   3  -6    2.66    0.69
   3  -3  -6    3.88    0.95
  -3  -3   6    2.85    0.61
   3  -3  -6    2.61    0.60
  -3  -3   6    3.00    0.68
  -3  -3   6    3.64    0.89
  -3  -3   6    3.16    0.60
  -3   3   6    0.82    1.14
   3   3  -6    2.62    0.64
  -3   3   6    1.61    0.61
  -2  -3   6   12.88    1.19
   2  -3  -6   14.52    1.19
  -2  -3   6   12.23    1.34
  -2  -3   6   15.16    1.49
   2  -3  -6   15.53    1.37
  -2  -3   6   15.24    1.12
   2   3  -6   13.94    1.19
  -2   3   6   15.03    1.18
  -2   3   6   12.75    1.53
  -1  -3   6   31.62    1.76
  -1  -3   6   30.62    2.00
   1  -3  -6   29.43    2.06
  -1  -3   6   32.46    1.85
  -1  -3   6   32.32    2.09
   1  -3  -6   30.58    1.74
   1   3  -6   29.89    1.85
  -1   3   6   28.87    1.68
  -1   3   6   28.84    1.75
  -1   3   6   35.17    2.18
   0  -3   6    2.48    0.74
   0  -3   6    2.48    0.57
   0  -3  -6    2.29    0.57
   0  -3   6    3.06    0.89
   0  -3  -6    2.27    0.71
   0  -3   6    2.65    0.67
   0   3  -6    2.65    0.70
   0   3   6    2.65    0.64
   0   3   6    2.00    0.49
   0   3  -6    2.49    0.68
   0   3   6    1.77    0.58
   0   3   6    3.24    0.94
   1  -3   6   43.81    2.42
   1  -3   6   43.48    2.68
  -1  -3  -6   45.78    2.29
   1  -3   6   45.34    2.70
   1  -3   6   45.08    2.31
   1   3   6   43.67    2.29
  -1   3  -6   49.01    2.41
   1   3   6   48.86    2.68
   1   3   6   44.97    2.58
  -1   3  -6   45.33    2.42
  -2  -3  -6    5.45    0.82
   2  -3   6    5.56    1.03
   2  -3   6    6.80    1.15
   2  -3   6    6.31    1.21
   2  -3   6    5.73    0.85
   2   3   6    5.34    0.70
   2   3   6    5.26    0.89
  -2   3  -6    5.13    0.74
   2   3   6    5.49    1.09
   2   3   6    5.46    0.93
  -2   3  -6    6.71    1.03
   3  -3   6   11.57    1.41
   3  -3   6    8.68    1.13
   3  -3   6   10.08    1.44
  -3  -3  -6    9.23    0.94
   3  -3   6    8.60    0.93
   3   3   6    9.65    1.12
  -3   3  -6    9.05    1.26
   3   3   6   10.08    1.02
   3   3   6    8.35    0.78
   4  -3   6    3.25    1.12
  -4  -3  -6    5.51    0.90
   4  -3   6    2.96    0.51
   4  -3   6    5.13    1.06
   4   3   6    3.87    0.69
   4   3   6    2.69    0.48
  -4   3  -6    2.60    0.88
  -7  -4   6   -0.68    0.70
   7  -4  -6    0.06    0.76
  -7  -4   6    0.15    0.40
  -7  -4   6    0.37    0.64
  -7  -4   6    0.05    0.83
   7  -4  -6    0.17    0.81
   7   4  -6    0.25    0.62
  -7   4   6    1.60    0.79
  -7   4   6    1.07    0.94
   6  -4  -6   18.13    1.43
   6  -4  -6   18.97    1.62
  -6  -4   6   18.15    1.34
  -6  -4   6   17.96    1.45
  -6  -4   6   16.46    1.18
  -6   4   6   14.92    1.49
   6   4  -6   17.78    1.32
  -5  -4   6   15.42    1.21
  -5  -4   6   16.80    1.18
  -5  -4   6   15.98    1.53
   5  -4  -6   16.10    1.23
   5  -4  -6   16.86    1.49
  -5  -4   6   15.76    1.34
  -5   4   6   17.18    1.39
   5   4  -6   14.15    1.20
  -4  -4   6   12.70    1.04
   4  -4  -6   12.07    1.25
  -4  -4   6   11.14    1.28
  -4  -4   6   11.18    1.01
  -4  -4   6   12.83    1.17
   4  -4  -6   12.81    1.08
   4   4  -6   10.64    1.06
  -4   4   6   11.08    1.16
  -3  -4   6    6.86    1.06
   3  -4  -6    7.72    0.95
  -3  -4   6    6.61    0.96
  -3  -4   6    8.14    0.97
  -3  -4   6    6.83    1.25
   3  -4  -6    9.62    1.17
   3   4  -6    6.28    0.98
  -3   4   6    7.50    0.99
  -2  -4   6   10.98    1.10
  -2  -4   6    9.03    1.16
   2  -4  -6   10.93    1.35
  -2  -4   6   11.75    1.07
  -2  -4   6   10.79    1.33
   2  -4  -6    9.99    1.05
  -2   4   6    9.66    1.02
   2   4  -6   10.24    1.18
   1  -4  -6    2.32    0.86
  -1  -4   6    2.99    0.77
  -1  -4   6    2.50    0.72
   1  -4  -6    2.90    0.60
  -1  -4   6    2.82    0.88
  -1  -4   6    2.68    0.61
  -1   4   6    2.19    0.59
  -1   4   6    2.32    0.57
   1   4  -6    1.93    0.67
  -1   4   6    2.80    1.10
   0  -4  -6   11.12    1.28
   0  -4   6   12.72    1.23
   0  -4  -6   12.24    1.04
   0  -4   6   13.29    1.12
   0  -4   6   10.83    1.29
   0  -4   6   13.26    1.28
   0   4   6   12.32    1.44
   0   4   6   10.58    1.08
   0   4  -6   14.39    1.26
   0   4  -6   10.98    1.23
   0   4   6   11.67    1.02
   0   4   6   10.49    0.95
   1  -4   6    0.26    0.62
   1  -4   6    0.59    0.63
   1  -4   6    0.05    0.47
   1  -4   6    0.67    0.78
  -1  -4  -6    0.44    0.45
   1   4   6   -0.06    0.79
   1   4   6   -0.27    0.52
  -1   4  -6    0.75    0.56
  -1   4  -6    0.56    0.62
   1   4   6   -0.31    0.38
   1   4   6   -0.11    0.47
   2  -4   6    5.42    0.92
   2  -4   6    5.66    0.98
   2  -4   6    5.42    0.85
   2  -4   6    7.19    1.21
  -2  -4  -6    4.83    0.80
  -2   4  -6    6.82    1.00
   2   4   6    5.26    0.68
   2   4   6    4.47    0.68
   2   4   6    4.51    0.67
  -2   4  -6    4.23    0.71
  -2   4  -6    4.61    0.75
   3  -4   6    7.15    1.09
   3  -4   6    7.69    0.93
  -3  -4  -6    7.19    0.87
   3  -4   6   10.18    1.48
   3  -4   6    7.57    1.49
  -3   4  -6    6.32    0.88
   3   4   6    6.12    0.72
   3   4   6    8.39    1.03
   3   4   6    6.86    0.91
   4  -4   6    1.74    0.50
   4  -4   6    3.83    1.24
   4  -4   6    2.61    1.03
   4   4   6    2.93    0.64
  -4   4  -6    1.59    0.90
   4   4   6    1.06    0.46
   7  -5  -6   -0.23    0.84
  -7  -5   6   -0.27    0.44
  -7  -5   6    0.14    0.66
  -7  -5   6   -1.49    0.71
   7   5  -6    0.08    0.61
  -7   5   6    0.14    0.94
  -7   5   6   -0.44    0.74
  -6  -5   6    2.02    0.49
  -6  -5   6    1.65    0.63
  -6  -5   6    1.87    0.67
   6  -5  -6    3.23    0.92
   6  -5  -6    1.82    0.69
   6   5  -6    1.99    0.61
  -6   5   6    1.55    0.75
  -5  -5   6    3.90    0.61
  -5  -5   6    4.09    0.73
   5  -5  -6    4.04    1.00
   5  -5  -6    3.40    0.64
  -5  -5   6    3.63    0.97
  -5  -5   6    3.89    0.65
   5   5  -6    3.30    0.61
  -5   5   6    3.62    0.76
   4  -5  -6    5.70    0.92
  -4  -5   6    5.94    1.18
  -4  -5   6    4.85    0.87
  -4  -5   6    4.93    0.94
  -4  -5   6    5.78    0.91
   4  -5  -6    5.42    1.07
   4   5  -6    5.40    0.70
  -4   5   6    6.50    0.79
  -3  -5   6    8.03    1.18
   3  -5  -6    7.42    0.89
   3  -5  -6    7.98    1.12
  -3  -5   6    9.19    0.95
  -3  -5   6    7.71    1.04
  -3  -5   6    7.48    1.02
  -3   5   6    7.51    1.03
   3   5  -6    6.68    0.97
  -2  -5   6   20.30    1.59
  -2  -5   6   21.85    1.38
   2  -5  -6   21.45    1.36
  -2  -5   6   20.01    1.45
  -2  -5   6   20.97    1.66
   2  -5  -6   21.22    1.58
   2   5  -6   17.87    1.40
  -2   5   6   19.30    1.42
  -1  -5   6    7.75    1.14
  -1  -5   6    7.82    1.20
   1  -5  -6    7.70    0.90
  -1  -5   6    8.79    1.28
  -1  -5   6    8.81    1.06
   1  -5  -6    8.60    1.23
   1   5  -6   10.11    1.10
  -1   5   6    8.53    0.98
   1   5  -6    7.01    1.06
   0  -5   6    8.65    1.20
   0  -5   6    8.50    0.95
   0  -5   6   10.23    1.28
   0  -5   6    8.30    1.16
   0  -5  -6    8.52    0.88
   0  -5  -6    8.79    1.17
   0   5   6    6.90    1.29
   0   5  -6    9.92    1.16
   0   5   6    6.04    0.84
   0   5   6    7.61    0.93
   0   5  -6    9.01    1.15
  -1  -5  -6   42.94    2.12
   1  -5   6   40.69    2.56
   1  -5   6   42.21    2.57
   1  -5   6   44.56    2.33
   1  -5   6   44.24    2.21
  -1  -5  -6   39.79    2.45
  -1   5  -6   38.91    2.29
  -1   5  -6   44.59    2.30
  -1   5  -6   43.48    2.52
   1   5   6   41.76    2.39
   1   5   6   37.78    2.08
   1   5   6   43.18    2.15
   2  -5   6   11.76    1.38
   2  -5   6   13.52    1.45
   2  -5   6   12.42    1.44
   2  -5   6   13.04    1.12
  -2  -5  -6   11.00    0.97
   2   5   6   12.62    1.08
   2   5   6    9.78    0.88
  -2   5  -6   13.63    1.28
  -2   5  -6   12.03    1.25
  -2   5  -6   12.14    1.22
   2   5   6   11.65    1.08
   3  -5   6    8.22    1.12
   3  -5   6    8.78    1.51
   3  -5   6    9.99    1.60
  -3  -5  -6    7.05    0.86
   3  -5   6    7.90    0.98
  -3   5  -6    8.65    1.36
   3   5   6    8.15    1.02
   3   5   6    6.71    0.91
   3   5   6    5.00    0.75
  -3   5  -6    5.81    1.08
  -4  -5  -6   19.45    1.30
   4  -5   6   15.20    2.05
   4  -5   6   15.00    1.39
   4  -5   6   16.03    1.23
   4  -5   6   16.83    2.08
  -4   5  -6   17.10    1.40
   4   5   6   15.57    1.36
   4   5   6   14.39    1.08
  -4   5  -6   16.47    1.85
   4   5   6   15.68    1.23
  -7  -6   6    6.29    0.85
  -7  -6   6    5.46    0.89
  -7  -6   6    5.53    0.87
   7  -6  -6    6.84    1.06
  -7   6   6    5.05    1.12
   7   6  -6    6.71    1.16
  -7   6   6    4.81    0.95
  -6  -6   6   25.94    1.52
  -6  -6   6   23.47    1.80
   6  -6  -6   29.09    1.78
   6  -6  -6   26.25    1.96
  -6  -6   6   26.77    1.66
  -6   6   6   26.13    1.87
   6   6  -6   25.50    1.64
  -5  -6   6    5.91    1.03
  -5  -6   6    5.65    0.72
   5  -6  -6    6.29    0.95
  -5  -6   6    6.36    0.87
  -5  -6   6    5.88    0.83
   5  -6  -6    6.26    1.14
  -5   6   6    6.17    0.89
   5   6  -6    5.79    0.98
  -4  -6   6    1.87    0.54
   4  -6  -6    2.55    0.60
  -4  -6   6    1.97    0.54
  -4  -6   6    1.85    0.61
  -4  -6   6    2.28    0.78
   4  -6  -6    1.56    0.89
   4   6  -6    1.19    0.57
  -4   6   6    2.18    0.67
   3  -6  -6   38.09    2.26
   3  -6  -6   36.81    1.95
  -3  -6   6   36.70    1.94
  -3  -6   6   36.89    2.01
  -3  -6   6   32.42    2.23
  -3  -6   6   37.83    2.20
   3   6  -6   33.94    2.01
  -3   6   6   38.20    2.05
  -2  -6   6   10.73    1.08
   2  -6  -6    9.70    0.94
   2  -6  -6   11.50    1.29
  -2  -6   6    9.23    1.20
  -2  -6   6    8.53    1.10
  -2  -6   6    9.31    1.26
   2   6  -6    8.74    1.13
  -2   6   6    8.73    1.04
  -1  -6   6   15.18    1.46
  -1  -6   6   15.79    1.31
  -1  -6   6   13.22    1.39
  -1  -6   6   15.49    1.23
   1  -6  -6   16.27    1.31
   1  -6  -6   13.94    1.13
  -1   6   6   13.72    1.14
   1   6  -6   12.91    1.24
   1   6  -6   16.28    1.24
   0  -6  -6    3.75    0.57
   0  -6   6    3.79    0.71
   0  -6   6    3.48    0.76
   0  -6   6    5.18    0.92
   0  -6   6    3.66    0.62
   0  -6  -6    3.85    0.82
   0   6  -6    3.02    0.71
   0   6   6    3.59    0.56
   0   6   6    2.84    0.58
   0   6  -6    2.78    0.74
   0   6  -6    3.69    0.71
  -1  -6  -6    5.40    0.80
  -1  -6  -6    5.46    1.08
   1  -6   6    4.97    0.83
   1  -6   6    5.78    1.13
   1  -6   6    8.09    1.01
   1  -6   6    7.21    1.14
  -1   6  -6    7.27    1.08
   1   6   6    5.26    0.87
   1   6   6    5.85    0.88
  -1   6  -6    4.39    0.76
   1   6   6    4.74    0.79
  -1   6  -6    5.38    0.86
  -2  -6  -6    9.85    0.92
   2  -6   6    9.54    1.32
   2  -6   6   11.44    1.45
   2  -6   6   11.94    1.15
   2  -6   6   12.11    1.46
   2   6   6    9.43    0.89
   2   6   6   10.25    1.03
  -2   6  -6   10.61    1.19
   2   6   6   10.22    1.01
  -2   6  -6   10.26    1.33
  -3  -6  -6   11.82    0.98
   3  -6   6   11.80    1.66
   3  -6   6   14.86    1.17
   3  -6   6   13.84    1.78
   3  -6   6   11.43    1.31
  -3   6  -6   11.10    1.24
  -3   6  -6   12.14    1.44
   3   6   6   10.49    0.93
   3   6   6   11.62    1.08
   4  -6   6    7.99    1.00
   4  -6   6    5.78    1.29
   4  -6   6    7.30    1.46
   4   6   6    7.70    1.11
   4   6   6    5.72    0.84
  -4   6  -6    6.81    1.12
   4   6   6    7.99    0.90
  -4   6  -6    5.79    1.13
  -7  -7   6    3.06    0.85
  -7  -7   6    4.60    0.68
   7  -7  -6    3.99    1.06
   7   7  -6    5.06    0.81
  -7   7   6    4.13    1.13
  -7   7   6    3.27    0.87
   6  -7  -6   21.10    1.85
  -6  -7   6   18.15    1.44
   6  -7  -6   18.73    1.59
  -6  -7   6   20.39    1.27
  -6  -7   6   18.05    1.58
   6   7  -6   19.35    1.45
  -6   7   6   18.65    1.69
  -5  -7   6    3.36    0.77
  -5  -7   6    4.91    0.84
  -5  -7   6    5.43    0.94
  -5  -7   6    3.75    0.66
   5  -7  -6    4.76    1.10
   5  -7  -6    4.15    0.75
  -5   7   6    3.62    0.80
   5   7  -6    3.50    0.67
   4  -7  -6    4.92    0.71
  -4  -7   6    4.18    0.76
  -4  -7   6    5.47    0.92
  -4  -7   6    4.09    0.67
   4  -7  -6    5.19    1.09
  -4  -7   6    5.56    0.85
  -4   7   6    5.37    0.79
   4   7  -6    3.85    0.67
   3  -7  -6   55.43    2.91
  -3  -7   6   50.11    2.47
   3  -7  -6   51.19    2.47
  -3  -7   6   47.20    2.82
  -3  -7   6   46.71    2.52
  -3  -7   6   47.60    2.80
   3   7  -6   44.14    2.49
  -3   7   6   47.45    2.56
  -2  -7   6    1.55    0.59
  -2  -7   6    1.63    0.63
   2  -7  -6    1.63    0.85
  -2  -7   6    1.97    0.80
   2  -7  -6    1.76    0.52
  -2  -7   6    1.18    0.66
  -2   7   6    1.89    0.59
  -2   7   6    0.38    0.86
   2   7  -6    1.60    0.62
   2   7  -6    1.76    0.62
  -1  -7   6   24.85    1.67
   1  -7  -6   27.39    1.55
  -1  -7   6   28.72    1.65
  -1  -7   6   25.90    1.82
   1  -7  -6   26.84    1.82
  -1  -7   6   26.19    1.89
   1   7  -6   21.92    1.62
  -1   7   6   25.49    1.58
   1   7  -6   28.84    1.70
   1   7  -6   27.03    1.78
   0  -7   6    4.58    0.76
   0  -7  -6    4.51    0.78
   0  -7   6    2.93    0.76
   0  -7   6    5.24    0.94
   0  -7   6    6.03    1.00
   0   7  -6    2.85    0.69
   0   7   6    3.83    0.59
   0   7   6    2.92    0.60
   0   7  -6    4.25    0.81
   0   7  -6    3.14    0.71
  -1  -7  -6   18.68    1.57
   1  -7   6   21.61    1.43
   1  -7   6   19.46    1.72
   1  -7   6   20.53    1.58
   1  -7   6   18.36    1.75
  -1  -7  -6   20.69    1.26
  -1   7  -6   20.04    1.52
  -1   7  -6   21.24    1.57
  -1   7  -6   21.76    1.58
   1   7   6   20.43    1.33
   1   7   6   20.33    1.29
   2  -7   6    6.24    1.08
  -2  -7  -6    3.93    0.55
   2  -7   6    4.32    0.84
   2  -7   6    5.48    0.94
   2  -7   6    7.35    1.10
   2   7   6    6.14    0.92
  -2   7  -6    6.30    1.13
  -2   7  -6    4.83    0.85
   2   7   6    4.44    0.83
   2   7   6    4.43    0.77
   3  -7   6    3.89    1.13
  -3  -7  -6    3.19    0.54
   3  -7   6    3.19    1.16
   3  -7   6    3.28    0.64
   3  -7   6    5.85    1.15
  -3   7  -6    2.54    0.89
  -3   7  -6    3.72    0.79
   3   7   6    2.28    0.52
   3   7   6    2.98    0.61
   4  -7   6    8.23    1.05
   4  -7   6    6.21    1.39
  -4  -7  -6    9.08    1.16
  -4   7  -6    6.13    1.14
  -4   7  -6    6.14    1.22
   4   7   6    6.37    1.17
  -7  -8   6    1.36    0.63
   7  -8  -6    1.03    1.16
  -7   8   6    2.59    1.12
  -7   8   6    2.80    0.89
  -6  -8   6    4.40    0.60
  -6  -8   6    5.14    0.86
  -6  -8   6    2.20    0.94
   6  -8  -6    3.65    0.91
  -6  -8   6    4.85    0.79
   6  -8  -6    4.04    1.24
  -6   8   6    4.68    0.98
  -6   8   6    4.60    0.96
   5  -8  -6   47.88    2.41
  -5  -8   6   41.34    2.28
   5  -8  -6   37.11    2.74
  -5  -8   6   44.40    2.57
  -5  -8   6   44.42    2.66
  -5  -8   6   47.45    2.33
   5   8  -6   44.39    2.36
  -5   8   6   45.15    2.51
  -4  -8   6    7.64    1.17
   4  -8  -6    8.97    1.08
   4  -8  -6    8.55    1.24
  -4  -8   6    8.39    1.03
  -4  -8   6    7.53    1.19
  -4  -8   6    6.53    0.97
  -4   8   6    8.76    1.23
   4   8  -6    7.98    1.09
   3  -8  -6    2.13    0.60
   3  -8  -6    2.75    0.99
  -3  -8   6    1.61    0.69
  -3  -8   6    1.83    0.58
  -3  -8   6    2.71    0.65
  -3  -8   6    1.97    0.79
   3   8  -6    2.16    0.64
  -3   8   6    0.08    0.87
  -3   8   6    1.91    0.68
   2  -8  -6   59.69    3.14
  -2  -8   6   51.98    3.06
  -2  -8   6   53.25    2.79
  -2  -8   6   49.83    3.09
   2  -8  -6   54.65    2.68
  -2  -8   6   55.45    2.71
  -2   8   6   50.60    2.74
   2   8  -6   57.45    2.76
   2   8  -6   50.71    2.74
  -1  -8   6    2.12    0.76
  -1  -8   6    2.04    0.63
  -1  -8   6    1.98    0.68
  -1  -8   6    3.12    0.90
   1  -8  -6    3.53    0.89
   1  -8  -6    2.58    0.56
  -1   8   6    2.61    0.61
   1   8  -6    3.33    0.69
   1   8  -6    2.39    0.75
   1   8  -6    2.06    0.66
   0  -8  -6    3.06    0.89
   0  -8   6    3.23    0.92
   0  -8   6    3.03    0.67
   0  -8   6    2.71    0.74
   0  -8   6    2.62    0.79
   0  -8  -6    1.87    0.51
   0   8  -6    1.95    0.68
   0   8  -6    2.77    0.67
   0   8  -6    2.44    0.75
   0   8   6    2.49    0.55
   1  -8   6    4.12    0.84
  -1  -8  -6    4.73    0.88
   1  -8   6    5.08    0.78
   1  -8   6    3.24    0.85
   1  -8   6    4.63    0.98
  -1  -8  -6    3.58    0.54
  -1   8  -6    4.29    0.81
   1   8   6    3.62    0.61
   1   8   6    3.76    0.56
  -1   8  -6    4.93    0.88
   2  -8   6    3.66    0.72
   2  -8   6    3.58    0.82
   2  -8   6    3.84    1.00
  -2  -8  -6    2.09    0.49
   2   8   6    4.01    0.62
  -2   8  -6    3.64    0.80
   2   8   6    2.39    0.58
   2   8   6    3.15    0.54
  -2   8  -6    3.23    0.81
   3  -8   6    1.10    0.72
   3  -8   6    1.95    1.13
   3  -8   6    1.01    1.10
  -3  -8  -6    0.61    0.50
   3  -8   6    0.70    0.64
  -3   8  -6    1.50    0.73
  -3   8  -6   -0.24    0.88
   3   8   6   -0.41    0.77
   3   8   6   -0.03    0.54
   3   8   6    0.09    0.50
   3   8   6    0.22    0.54
  -6  -9   6   11.41    1.37
  -6  -9   6   13.24    1.51
   6  -9  -6    9.76    1.51
  -6  -9   6   14.10    1.09
   6   9  -6   15.59    1.35
  -6   9   6   11.94    1.56
  -6   9   6   11.87    1.62
  -5  -9   6    9.93    1.26
   5  -9  -6   11.62    1.48
  -5  -9   6   12.13    1.04
  -5  -9   6   11.05    1.22
  -5  -9   6   11.88    1.42
   5  -9  -6   12.38    1.31
   5   9  -6   13.02    1.30
  -5   9   6    9.90    1.38
  -4  -9   6    2.51    0.78
   4  -9  -6    1.85    0.97
  -4  -9   6    1.80    0.77
  -4  -9   6    2.91    0.65
  -4  -9   6    2.74    0.68
   4  -9  -6    2.67    0.68
   4   9  -6    2.82    0.73
  -4   9   6    2.74    0.74
  -3  -9   6   27.37    1.75
   3  -9  -6   27.25    1.65
   3  -9  -6   28.54    2.06
  -3  -9   6   27.53    1.72
  -3  -9   6   26.69    1.87
  -3  -9   6   27.48    1.99
  -3   9   6   29.72    1.79
   3   9  -6   26.42    1.75
   2  -9  -6    9.23    1.03
  -2  -9   6   10.63    1.34
  -2  -9   6    8.90    1.24
   2  -9  -6   10.75    1.39
  -2  -9   6   11.40    1.19
  -2  -9   6    9.57    1.15
   2   9  -6   11.53    1.17
  -2   9   6   11.30    1.20
   2   9  -6    8.70    1.12
   2   9  -6   10.95    1.26
  -1  -9   6    5.59    0.98
  -1  -9   6    4.83    0.89
   1  -9  -6    6.29    1.07
  -1  -9   6    6.41    1.12
  -1  -9   6    5.78    0.84
   1  -9  -6    5.29    0.86
  -1   9   6    5.20    0.73
   1   9  -6    5.61    1.06
   1   9  -6    6.06    1.02
   1   9  -6    4.96    0.78
   0  -9   6    5.42    0.86
   0  -9  -6    5.29    0.86
   0  -9   6    5.68    0.81
   0  -9   6    5.24    1.01
   0  -9   6    5.72    0.95
   0  -9  -6    6.16    1.00
   0   9  -6    5.18    0.82
   0   9  -6    5.56    0.92
   0   9   6    5.94    0.93
  -1  -9  -6    3.95    0.91
   1  -9   6    2.79    0.78
  -1  -9  -6    2.21    0.51
   1  -9   6    2.99    0.84
   1  -9   6    2.63    0.92
   1  -9   6    3.22    0.75
  -1   9  -6    2.15    0.76
   1   9   6    2.69    0.61
   1   9   6    3.46    0.59
  -1   9  -6    3.57    0.85
   2  -9   6   11.28    1.39
  -2  -9  -6    9.31    0.91
  -2  -9  -6    8.68    1.28
   2  -9   6   13.53    1.77
   2  -9   6   10.07    1.18
  -2   9  -6    9.50    1.30
   2   9   6   10.07    0.98
  -2   9  -6    9.91    1.42
   2   9   6    8.02    0.98
   2   9   6   10.02    1.02
   3  -9   6    2.83    0.80
   3  -9   6    4.17    1.28
  -3  -9  -6    3.02    0.60
  -3   9  -6    3.54    1.03
   3   9   6    2.70    0.66
   3   9   6    3.13    0.59
   3   9   6    3.62    0.60
  -3   9  -6    3.13    0.82
  -6 -10   6    8.09    0.97
   6 -10  -6    6.46    1.10
  -6 -10   6    9.79    1.04
  -6 -10   6    9.57    1.51
  -6  10   6    8.45    1.45
  -6  10   6   10.65    1.60
  -5 -10   6    5.62    0.96
  -5 -10   6    4.21    0.79
   5 -10  -6    1.45    1.07
  -5 -10   6    6.60    0.87
   5 -10  -6    4.04    0.83
  -5 -10   6    3.67    0.74
  -5  10   6    2.74    0.92
  -5  10   6    5.22    0.89
  -4 -10   6   15.30    1.23
  -4 -10   6   15.09    1.57
  -4 -10   6   14.64    1.38
   4 -10  -6   15.54    1.31
  -4 -10   6   16.62    1.35
  -4  10   6   14.87    1.44
   4  10  -6   14.26    1.38
  -3 -10   6   21.76    1.48
   3 -10  -6   20.89    1.79
  -3 -10   6   19.11    1.74
  -3 -10   6   18.69    1.58
  -3 -10   6   20.24    1.48
   3 -10  -6   20.04    1.46
   3  10  -6   20.30    1.55
  -3  10   6   20.51    1.55
  -2 -10   6   10.12    1.14
  -2 -10   6   10.78    1.18
   2 -10  -6    8.43    1.10
  -2 -10   6    7.55    1.33
   2 -10  -6    8.79    1.44
  -2 -10   6    9.56    1.31
  -2  10   6   10.06    1.23
   2  10  -6    9.10    1.25
   2  10  -6   11.67    1.17
  -1 -10   6    2.02    0.84
  -1 -10   6    3.19    0.75
   1 -10  -6    2.06    0.98
  -1 -10   6    2.63    0.72
   1 -10  -6    2.34    0.59
  -1 -10   6    2.68    0.89
   1  10  -6    2.99    0.83
   1  10  -6    1.68    0.70
  -1  10   6    2.72    0.65
   0 -10  -6    5.18    0.85
   0 -10  -6    5.46    1.06
   0 -10   6    4.24    0.97
   0 -10   6    4.20    0.92
   0 -10   6    4.90    0.85
   0 -10   6    5.34    0.83
   0  10   6    4.30    0.69
   0  10  -6    4.98    0.92
   0  10  -6    3.51    0.78
   1 -10   6    1.65    0.74
   1 -10   6    1.54    0.77
   1 -10   6    0.76    0.68
  -1 -10  -6    0.76    0.88
  -1 -10  -6    0.40    0.48
   1  10   6    0.89    0.59
   1  10   6   -0.88    0.88
  -1  10  -6    1.39    0.80
   1  10   6    0.87    0.54
  -1  10  -6    0.50    0.72
  -2 -10  -6    1.92    0.86
   2 -10   6    3.46    1.06
   2 -10   6    2.50    0.75
  -2 -10  -6    2.23    0.52
   2 -10   6    3.80    0.87
   2  10   6    3.23    0.62
   2  10   6    3.02    0.64
  -2  10  -6    3.33    0.88
   2  10   6    3.20    0.63
  -2  10  -6    2.37    0.83
   3 -10   6    0.78    1.35
  -3 -10  -6   -0.52    0.57
   3 -10   6   -0.29    0.71
   3  10   6    0.31    0.55
  -3  10  -6    0.43    0.77
  -3  10  -6    1.12    0.98
   3  10   6    0.34    0.64
  -6 -11   6    2.49    0.66
  -6  11   6    1.15    0.94
  -6  11   6    1.40    0.83
   5 -11  -6    2.29    1.15
  -5 -11   6    6.28    0.88
   5 -11  -6    4.41    0.88
  -5 -11   6    5.21    1.02
  -5 -11   6    5.35    0.87
  -5  11   6    4.24    0.98
  -5  11   6    5.17    0.91
  -4 -11   6    9.05    0.98
   4 -11  -6    4.36    1.16
  -4 -11   6    6.12    1.09
  -4 -11   6    8.04    1.51
  -4 -11   6    9.25    1.26
   4 -11  -6    6.25    0.83
  -4  11   6    6.16    1.12
  -4  11   6    7.20    1.17
   3 -11  -6   18.59    1.83
  -3 -11   6   20.85    1.54
  -3 -11   6   19.22    1.81
   3 -11  -6   19.54    1.43
  -3 -11   6   15.96    1.53
  -3 -11   6   19.98    1.46
  -3  11   6   19.22    1.59
  -2 -11   6    6.95    1.11
   2 -11  -6    7.32    1.25
  -2 -11   6    8.44    1.16
  -2 -11   6    5.61    1.02
  -2 -11   6    7.19    1.29
   2 -11  -6    5.82    0.80
   2  11  -6    8.48    1.14
  -2  11   6    6.01    0.87
   2  11  -6    6.08    0.98
   1 -11  -6    8.53    1.01
  -1 -11   6    9.60    1.46
  -1 -11   6    7.44    1.36
  -1 -11   6   10.63    1.28
  -1 -11   6    8.30    1.29
   1 -11  -6    8.34    1.21
   1  11  -6    9.57    1.22
   1  11  -6    9.96    1.30
  -1  11   6    7.68    1.14
   0 -11   6   12.09    1.46
   0 -11   6    9.03    1.33
   0 -11  -6    9.77    1.56
   0 -11  -6    9.26    0.96
   0  11   6    8.79    1.09
   0  11  -6    9.79    1.29
   0  11  -6    9.89    1.36
   1 -11   6    3.86    0.87
  -1 -11  -6    3.01    1.03
   1 -11   6    3.37    0.85
  -1 -11  -6    1.52    0.48
   1 -11   6    2.16    0.77
   1  11   6    2.07    0.69
   1  11   6   -0.29    0.91
  -1  11  -6    2.42    0.81
  -1  11  -6    2.54    0.87
   1  11   6    1.97    0.61
   2 -11   6    5.33    0.86
  -2 -11  -6    5.14    1.04
  -2 -11  -6    5.09    0.67
   2  11   6    4.97    0.74
   2  11   6    4.88    0.73
  -2  11  -6    5.32    0.96
  -2  11  -6    7.84    1.32
  -5 -12   6    2.91    0.89
  -5 -12   6    3.55    1.10
  -5  12   6    2.62    0.95
  -5  12   6    3.18    0.86
  -4 -12   6    0.42    0.62
   4 -12  -6    0.39    0.64
  -4 -12   6    1.56    0.54
  -4 -12   6    1.21    0.83
   4 -12  -6   -0.60    1.13
  -4 -12   6    1.83    0.99
  -4  12   6    1.27    0.89
  -4  12   6    1.53    0.78
   3 -12  -6   -0.32    0.60
   3 -12  -6   -1.21    1.08
  -3 -12   6    1.86    0.64
  -3 -12   6    0.70    0.70
  -3 -12   6    1.71    0.92
  -3 -12   6    0.05    0.73
  -3  12   6    0.25    0.90
   3  12  -6    0.38    0.64
  -3  12   6    0.30    0.67
  -2 -12   6   10.54    1.32
  -2 -12   6    7.52    1.31
   2 -12  -6    7.49    1.31
  -2 -12   6   11.26    1.64
   2 -12  -6    7.10    1.14
   2  12  -6    7.99    1.18
   2  12  -6    6.55    1.32
  -2  12   6    7.13    0.95
  -1 -12   6   14.48    1.61
  -1 -12   6   15.90    1.42
  -1 -12   6   12.41    1.50
   1 -12  -6   12.08    1.18
  -1 -12   6   13.54    1.54
   1 -12  -6   13.05    1.77
  -1  12   6   11.69    1.29
   1  12  -6   15.69    1.37
   1  12  -6   14.70    1.51
   0 -12   6    3.52    0.79
   0 -12   6    2.03    0.80
   0 -12  -6    1.43    0.52
   0 -12  -6    2.46    1.13
   0 -12   6    3.31    0.93
   0  12   6    0.26    1.01
   0  12   6    1.97    0.62
   0  12  -6    2.75    0.90
   0  12  -6    1.58    0.74
   1 -12   6    1.54    0.83
  -1 -12  -6   -0.10    0.48
   1 -12   6    0.87    0.76
  -1 -12  -6    0.88    1.15
   1 -12   6    3.52    0.91
   1  12   6    1.85    0.63
   1  12   6    0.61    0.72
  -1  12  -6    1.04    0.82
  -1  12  -6    1.15    0.74
   1  12   6    1.31    1.09
   2 -12   6    4.43    1.26
   2 -12   6    2.45    0.86
  -2 -12  -6    0.90    0.58
   2  12   6    1.18    1.14
   2  12   6    2.52    0.73
  -2  12  -6    1.85    0.87
  -2  12  -6    2.98    0.92
  -4 -13   6    2.64    0.96
  -4 -13   6    3.88    1.21
   4 -13  -6    2.28    0.79
  -4  13   6    3.84    0.83
  -4  13   6    4.54    1.06
  -3 -13   6   12.49    1.20
  -3 -13   6   12.09    1.53
  -3 -13   6   10.15    1.30
  -3 -13   6   11.14    1.90
   3 -13  -6    8.55    1.21
   3  13  -6   10.22    1.17
  -3  13   6   11.57    1.78
   3  13  -6    7.89    1.62
  -3  13   6   11.06    1.40
  -2 -13   6    6.41    1.23
  -2 -13   6    9.00    1.72
   2 -13  -6    6.44    1.09
   2 -13  -6    6.46    1.36
  -2 -13   6    9.87    1.49
   2  13  -6    9.22    1.57
  -2  13   6    5.43    1.24
   2  13  -6    6.80    1.11
  -2  13   6    8.20    1.19
  -1 -13   6    0.02    0.79
  -1 -13   6   -0.03    0.76
   1 -13  -6   -1.49    1.22
  -1 -13   6    1.72    1.06
   1 -13  -6   -0.51    0.58
   1  13  -6    0.98    0.70
  -1  13   6   -0.42    1.07
   1  13  -6    1.45    0.95
  -1  13   6    0.88    0.65
   0 -13   6   17.26    1.82
   0 -13   6   18.17    1.62
   0 -13   6   18.74    1.60
   0 -13  -6   13.90    1.18
   0 -13  -6   15.10    2.06
   0  13   6   14.63    2.05
   0  13  -6   15.44    1.74
   0  13   6   17.27    1.41
   0  13  -6   15.46    1.49
  -1 -13  -6    3.60    0.66
   1 -13   6    4.58    1.02
  -1 -13  -6    4.77    1.37
   1 -13   6    5.30    0.94
   1  13   6    2.93    0.88
  -1  13  -6    4.79    1.05
   1  13   6    3.95    0.73
  -1  13  -6    3.86    0.88
   1  13   6    3.99    1.22
  -3 -14   6    7.91    1.22
  -3 -14   6    8.25    1.48
  -3 -14   6    7.33    1.17
  -3  14   6   10.41    1.98
   3  14  -6    6.86    1.10
  -3  14   6    8.41    1.26
   3  14  -6    4.39    1.31
  -2 -14   6    7.83    1.11
  -2 -14   6    8.53    1.36
  -2 -14   6   10.72    2.05
   2  14  -6    7.83    1.27
   2  14  -6    6.56    0.89
  -2  14   6    6.51    1.39
  -1 -14   6    1.88    0.83
  -1 -14   6    2.42    1.17
  -1 -14   6    1.35    0.96
   1 -14  -6   -1.97    1.39
   1  14  -6    1.19    0.71
  -1  14   6    2.06    0.72
   1  14  -6    0.96    1.04
  -1  14   6    2.37    1.33
   0 -14   6    9.08    1.46
   0 -14   6    9.26    1.55
   0 -14  -6    8.32    1.61
   0  14  -6    6.00    0.95
   0  14   6    8.92    1.50
   0  14  -6    7.02    1.24
   0  14   6    7.50    1.16
   7   0  -7   -0.35    0.58
   7   0  -7   -0.84    0.78
  -7   0   7   -0.96    0.85
  -7   0   7   -0.09    0.84
   6   0  -7   11.57    1.31
  -6   0   7    9.48    1.29
   6   0  -7   10.92    1.23
  -4   0   7   17.13    1.42
  -4   0   7   16.03    1.23
  -4   0   7   21.22    1.81
   4   0  -7   16.17    1.51
   4   0  -7   16.34    1.30
  -4   0   7   18.10    1.32
  -3   0   7   25.12    1.84
  -3   0   7   19.89    1.55
  -3   0   7   22.25    1.42
   3   0  -7   20.11    1.37
  -3   0   7   19.75    1.36
   3   0  -7   18.96    1.67
  -2   0   7   34.38    1.88
  -2   0   7   35.20    2.14
  -2   0   7   32.07    1.84
   2   0  -7   32.44    2.14
   2   0  -7   34.07    1.90
  -2   0   7   37.47    2.30
  -1   0   7    1.62    0.84
  -1   0   7    2.02    0.64
  -1   0   7    1.52    0.51
  -1   0   7    1.40    0.58
   1   0  -7    0.80    0.55
   0   0  -7   30.81    1.86
   0   0   7   31.49    1.75
   0   0   7   33.37    1.90
   0   0   7   33.88    2.15
   0   0   7   31.60    2.05
  -1   0  -7   -0.17    0.55
   1   0   7    0.31    0.87
   1   0   7    0.17    0.43
   1   0   7   -0.55    0.54
   1   0   7    0.83    0.65
   2   0   7    1.00    0.74
   2   0   7    0.57    0.94
  -2   0  -7    0.26    0.57
   2   0   7    1.62    0.59
   2   0   7    0.44    0.41
   3   0   7    3.90    1.14
  -3   0  -7    6.05    0.90
   3   0   7    4.40    0.71
   3   0   7    6.22    0.99
   3   0   7    5.46    0.76
   7  -1  -7    1.17    0.84
  -7  -1   7    0.91    0.44
   7  -1  -7    2.35    0.75
  -7  -1   7    0.40    0.86
  -7  -1   7    0.83    0.89
  -7  -1   7    2.02    0.93
   7   1  -7    1.79    0.66
  -7   1   7    0.53    0.92
   7   1  -7    1.07    0.79
  -7   1   7   -0.66    0.81
   6  -1  -7    7.21    1.20
  -6  -1   7    7.06    1.21
  -6  -1   7    5.18    0.87
   6  -1  -7    8.28    1.22
  -6  -1   7    6.08    0.93
  -6   1   7    3.54    1.10
   6   1  -7    5.53    1.11
  -6   1   7    4.36    0.83
   6   1  -7    6.07    0.84
  -5  -1   7   26.19    1.75
   5  -1  -7   22.42    1.57
   5  -1  -7   23.64    1.79
  -5  -1   7   24.85    1.59
  -5  -1   7   23.07    1.55
   5   1  -7   24.67    1.59
  -5   1   7   22.04    1.61
   5   1  -7   23.44    1.83
   4  -1  -7    1.14    0.58
   4  -1  -7    1.59    0.81
  -4  -1   7    1.49    0.64
  -4  -1   7    0.71    0.56
  -4  -1   7    2.11    1.05
  -4  -1   7    1.37    0.56
   4   1  -7    1.09    0.67
  -4   1   7    1.28    1.06
   4   1  -7    0.34    0.56
  -4   1   7    1.08    0.57
  -4   1   7    0.98    0.55
  -3  -1   7   51.69    2.49
  -3  -1   7   48.13    2.51
   3  -1  -7   46.76    2.83
  -3  -1   7   48.85    2.83
  -3  -1   7   54.96    2.97
   3  -1  -7   50.15    2.51
  -3   1   7   45.74    2.47
   3   1  -7   49.29    2.88
   3   1  -7   43.89    2.47
  -3   1   7   49.76    2.51
  -2  -1   7    2.73    0.86
  -2  -1   7    1.79    0.55
   2  -1  -7    1.00    0.69
   2  -1  -7    1.64    0.57
  -2  -1   7    1.52    0.63
  -2  -1   7    1.89    0.59
   2   1  -7    1.25    0.58
  -2   1   7    1.42    0.57
  -2   1   7    2.54    0.63
  -2   1   7    1.76    0.54
  -2   1   7    2.22    0.99
  -1  -1   7    0.78    0.60
   1  -1  -7    0.02    0.65
  -1  -1   7    0.63    0.80
  -1  -1   7    0.18    0.48
   1  -1  -7   -0.13    0.53
  -1  -1   7    0.27    0.55
  -1   1   7    0.57    0.49
  -1   1   7    0.72    0.85
  -1   1   7    0.00    0.57
   1   1  -7    0.10    0.53
  -1   1   7    0.34    0.55
   0  -1   7    8.33    1.13
   0  -1   7    7.20    0.89
   0  -1   7    7.19    1.08
   0  -1   7    7.64    1.27
   0  -1  -7    7.54    0.95
   0   1   7    8.71    1.04
   0   1   7    8.91    1.30
   0   1   7    7.78    0.86
   0   1  -7    7.81    1.04
   0   1   7    8.50    1.10
   1  -1   7    7.06    0.84
   1  -1   7    6.28    1.03
   1  -1   7    5.88    1.11
   1  -1   7    7.27    1.17
  -1  -1  -7    6.16    0.97
   1   1   7    5.49    1.01
   1   1   7    5.56    0.79
   1   1   7    6.35    1.26
  -1   1  -7    4.98    0.74
   1   1   7    6.52    0.81
   2  -1   7    1.68    0.63
   2  -1   7    1.28    0.95
   2  -1   7    1.94    0.79
   2  -1   7    1.22    0.46
  -2  -1  -7    1.74    0.54
   2   1   7    2.36    0.78
  -2   1  -7    2.14    0.62
   2   1   7    1.19    0.43
   2   1   7    1.39    0.56
   2   1   7    0.66    0.90
   3  -1   7    3.58    1.16
  -3  -1  -7    7.03    0.89
   3  -1   7    4.20    0.57
   3  -1   7    4.92    0.94
   3  -1   7    5.36    1.04
   3   1   7    2.16    1.03
   3   1   7    4.42    0.72
   3   1   7    5.20    0.94
   3   1   7    5.04    0.74
  -3   1  -7    4.04    0.64
  -7  -2   7    1.03    0.85
  -7  -2   7    0.70    0.46
   7  -2  -7    1.53    0.90
  -7  -2   7   -0.33    0.84
  -7  -2   7    0.44    0.90
   7  -2  -7    1.04    0.74
  -7   2   7   -0.05    0.87
   7   2  -7    1.35    0.61
  -7   2   7    0.98    0.94
   7   2  -7    0.92    0.84
  -6  -2   7   15.63    1.51
  -6  -2   7   17.88    1.28
   6  -2  -7   17.62    1.47
  -6  -2   7   19.41    1.61
   6  -2  -7   19.86    1.64
   6   2  -7   17.88    1.50
   6   2  -7   19.77    1.54
  -6   2   7   16.72    1.53
  -5  -2   7    4.66    1.14
  -5  -2   7    4.44    0.79
   5  -2  -7    2.95    0.66
   5  -2  -7    4.85    0.92
  -5  -2   7    4.15    0.66
  -5  -2   7    3.77    0.70
   5   2  -7    3.96    0.82
   5   2  -7    4.76    0.76
  -5   2   7    2.54    1.04
  -5   2   7    3.15    0.74
  -4  -2   7   12.38    1.16
  -4  -2   7   12.72    1.26
   4  -2  -7   12.32    1.31
  -4  -2   7   12.28    1.53
   4  -2  -7   11.84    1.12
  -4  -2   7   12.38    1.14
   4   2  -7   12.18    1.29
   4   2  -7   12.60    1.17
  -4   2   7   11.57    1.18
  -3  -2   7   15.83    1.53
  -3  -2   7   13.75    1.19
   3  -2  -7   13.30    1.15
  -3  -2   7   13.40    1.09
  -3  -2   7   13.49    1.31
   3  -2  -7   13.15    1.42
  -3   2   7   13.56    1.13
  -3   2   7   13.57    1.11
   3   2  -7   11.97    1.14
   2  -2  -7   10.04    1.07
  -2  -2   7   11.88    1.16
  -2  -2   7   10.17    1.05
  -2  -2   7    8.95    1.37
  -2  -2   7   11.14    1.09
  -2   2   7   11.47    1.02
  -2   2   7   11.47    0.99
  -2   2   7   12.30    1.09
   2   2  -7   11.03    1.14
  -2   2   7   12.22    1.52
   1  -2  -7   -0.50    0.63
  -1  -2   7   -0.43    0.47
  -1  -2   7    0.30    0.56
  -1  -2   7   -0.58    0.81
   1  -2  -7   -0.13    0.48
  -1  -2   7   -0.39    0.59
  -1   2   7   -0.76    0.50
  -1   2   7    0.18    0.84
   1   2  -7   -0.05    0.55
  -1   2   7   -0.08    0.46
  -1   2   7    0.20    0.54
   0  -2   7    1.47    0.82
   0  -2   7    1.26    0.50
   0  -2  -7    0.88    0.56
   0  -2   7    1.68    0.67
   0  -2   7    1.18    0.64
   0   2   7    1.81    0.64
   0   2   7    1.47    0.57
   0   2  -7    1.27    0.60
   0   2   7    1.84    0.86
   0   2   7    1.45    0.50
   1  -2   7   20.03    1.51
   1  -2   7   20.71    1.27
   1  -2   7   19.89    1.57
  -1  -2  -7   17.89    1.33
   1  -2   7   17.21    1.65
   1   2   7   21.89    1.68
   1   2   7   18.17    1.48
  -1   2  -7   18.42    1.48
   1   2   7   19.18    1.24
   1   2   7   19.03    1.44
   2  -2   7    0.76    0.92
   2  -2   7    2.60    0.86
   2  -2   7    1.60    0.48
   2  -2   7    2.48    0.69
  -2  -2  -7    1.37    0.51
   2   2   7    1.84    0.73
   2   2   7    0.71    0.92
   2   2   7    1.49    0.44
   2   2   7    1.12    0.57
  -2   2  -7    2.16    0.61
   3  -2   7    1.24    0.58
   3  -2   7    0.56    1.04
   3  -2   7    1.16    0.45
   3  -2   7    2.42    1.04
   3   2   7   -0.35    1.03
   3   2   7    1.88    0.84
   3   2   7    0.62    0.43
   3   2   7    1.97    0.61
   7  -3  -7    0.58    0.70
  -7  -3   7    0.39    0.82
  -7  -3   7    0.74    0.89
  -7  -3   7    1.65    0.47
  -7  -3   7   -0.82    0.90
   7  -3  -7   -0.13    0.85
   7   3  -7    0.43    0.57
   7   3  -7    0.04    0.78
  -7   3   7    0.08    0.99
  -7   3   7   -0.35    0.83
   6  -3  -7    3.27    0.79
  -6  -3   7    3.37    0.83
  -6  -3   7    2.10    0.78
   6  -3  -7    4.14    0.92
  -6  -3   7    4.93    0.86
   6   3  -7    3.34    0.70
  -6   3   7    2.82    0.84
  -6   3   7    4.70    1.09
   6   3  -7    3.40    0.78
  -5  -3   7   16.24    1.31
  -5  -3   7   18.27    1.53
   5  -3  -7   17.92    1.59
  -5  -3   7   17.31    1.27
   5  -3  -7   17.58    1.36
   5   3  -7   15.43    1.47
   5   3  -7   17.61    1.42
  -5   3   7   16.97    1.39
  -4  -3   7    1.87    0.97
   4  -3  -7    1.69    0.84
  -4  -3   7    1.36    0.66
   4  -3  -7    0.65    0.57
  -4  -3   7    0.61    0.55
  -4  -3   7    0.75    0.54
  -4   3   7    0.82    0.62
   4   3  -7    0.56    0.60
  -4   3   7   -0.32    1.06
   3  -3  -7   13.55    1.28
  -3  -3   7   13.11    1.12
  -3  -3   7   11.09    1.12
  -3  -3   7   12.58    1.27
   3  -3  -7   11.03    1.04
  -3  -3   7   12.17    1.34
   3   3  -7   11.74    1.11
  -3   3   7   10.03    1.06
   2  -3  -7    6.72    0.98
  -2  -3   7    7.72    1.06
  -2  -3   7    5.66    1.00
   2  -3  -7    6.20    0.93
  -2  -3   7    5.56    0.87
  -2  -3   7    5.38    0.75
   2   3  -7    6.73    0.82
  -2   3   7    5.95    0.92
  -2   3   7    8.14    1.47
  -2   3   7    6.33    0.92
  -1  -3   7    2.44    0.56
   1  -3  -7    0.87    0.80
  -1  -3   7    2.58    0.72
  -1  -3   7    1.33    0.79
   1  -3  -7    1.91    0.57
  -1  -3   7    2.09    0.65
  -1   3   7    2.21    0.99
   1   3  -7    1.47    0.61
  -1   3   7    2.27    0.64
  -1   3   7    1.61    0.55
  -1   3   7    1.92    0.52
   0  -3   7    3.27    0.90
   0  -3   7    2.96    0.73
   0  -3   7    4.03    0.81
   0  -3  -7    2.53    0.76
   0  -3  -7    2.58    0.56
   0  -3   7    3.66    0.61
   0   3   7    2.96    0.54
   0   3  -7    2.81    0.71
   0   3   7    3.85    0.97
   0   3   7    2.35    0.68
   0   3   7    2.76    0.62
   1  -3   7    0.39    0.66
   1  -3   7    1.40    0.70
   1  -3   7    1.19    0.54
  -1  -3  -7    0.11    0.53
   1  -3   7    0.70    0.85
  -1   3  -7    0.72    0.62
   1   3   7    1.08    0.58
   1   3   7    0.57    0.62
   1   3   7    0.91    0.90
   1   3   7    0.55    0.43
  -2  -3  -7    1.85    0.51
   2  -3   7    1.63    0.50
   2  -3   7    2.01    1.00
   2  -3   7    2.58    0.87
   2  -3   7    1.20    0.63
  -2   3  -7    1.72    0.61
   2   3   7    1.78    0.45
  -2   3  -7    1.37    0.77
   2   3   7    1.69    0.57
   2   3   7    2.35    0.74
   2   3   7    0.41    0.92
   3  -3   7    0.77    0.59
   3  -3   7    0.48    0.45
   3  -3   7    2.45    1.04
  -3  -3  -7    1.61    0.55
   3  -3   7    0.35    1.13
   3   3   7    0.57    0.44
  -3   3  -7    0.23    0.90
   3   3   7    1.97    0.81
   3   3   7    0.11    1.00
   3   3   7    1.31    0.60
  -7  -4   7   -0.30    0.89
  -7  -4   7    0.17    0.45
  -7  -4   7    1.10    0.88
   7  -4  -7    0.15    0.88
  -7  -4   7    2.00    0.94
   7   4  -7    0.80    0.83
  -7   4   7    0.95    1.03
   6  -4  -7    7.98    1.23
  -6  -4   7    9.34    1.35
   6  -4  -7    9.20    1.32
  -6  -4   7    6.98    1.26
  -6  -4   7   10.36    0.97
   6   4  -7    9.49    1.30
  -6   4   7    8.37    1.08
  -5  -4   7    2.63    1.03
  -5  -4   7    0.66    0.63
  -5  -4   7    2.01    0.56
   5  -4  -7    0.56    0.61
   5  -4  -7    2.39    0.91
  -5  -4   7    1.80    0.72
  -5   4   7    0.51    1.01
  -5   4   7    1.08    0.71
   5   4  -7    1.51    0.66
  -4  -4   7   15.52    1.25
  -4  -4   7   14.87    1.38
   4  -4  -7   14.87    1.18
   4  -4  -7   17.39    1.52
  -4  -4   7   14.49    1.24
  -4  -4   7   14.99    1.54
   4   4  -7   13.94    1.29
  -4   4   7   13.46    1.26
  -3  -4   7   16.84    1.46
   3  -4  -7   16.77    1.45
   3  -4  -7   16.30    1.23
  -3  -4   7   16.39    1.57
  -3  -4   7   16.62    1.27
  -3  -4   7   15.31    1.24
   3   4  -7   16.18    1.31
  -3   4   7   13.98    1.24
  -2  -4   7    0.84    0.65
   2  -4  -7    1.41    0.57
   2  -4  -7    1.01    0.78
  -2  -4   7    1.47    0.80
  -2  -4   7    1.41    0.62
  -2  -4   7    1.17    0.55
  -2   4   7   -0.57    1.00
  -2   4   7    1.62    0.56
   2   4  -7    1.53    0.63
  -2   4   7    1.21    0.57
   1  -4  -7    0.64    0.52
  -1  -4   7    1.12    0.80
  -1  -4   7    0.58    0.61
   1  -4  -7   -0.04    0.75
  -1  -4   7    1.15    0.54
  -1  -4   7    1.39    0.67
   1   4  -7    0.48    0.62
  -1   4   7    0.89    0.56
  -1   4   7    0.38    0.97
  -1   4   7    0.12    0.51
   0  -4   7    4.26    0.65
   0  -4  -7    3.71    0.63
   0  -4   7    4.23    0.95
   0  -4   7    4.30    0.82
   0  -4  -7    3.62    0.83
   0  -4   7    5.29    0.82
   0   4   7    3.64    0.65
   0   4   7    5.75    1.09
   0   4  -7    3.32    0.74
   0   4   7    3.64    0.59
   0   4   7    4.55    0.89
  -1  -4  -7    5.93    0.90
   1  -4   7    7.10    1.30
   1  -4   7    7.87    0.97
   1  -4   7    7.99    1.24
   1  -4   7    7.72    1.20
  -1   4  -7    7.74    1.12
   1   4   7    6.92    1.10
   1   4   7    6.78    1.00
   1   4   7    6.70    1.09
   1   4   7    5.95    0.80
  -1   4  -7    7.66    1.25
   2  -4   7    2.79    1.00
   2  -4   7    2.81    0.57
  -2  -4  -7    3.21    0.54
   2  -4   7    4.68    0.96
   2  -4   7    3.33    0.75
   2   4   7    3.50    0.74
  -2   4  -7    3.07    0.83
   2   4   7    2.57    0.60
   2   4   7    2.36    0.48
  -2   4  -7    2.41    0.64
   2   4   7    0.70    0.99
   3  -4   7   10.82    1.06
  -3  -4  -7   13.34    1.12
   3  -4   7   11.74    1.25
   3  -4   7   15.13    1.99
   3  -4   7   11.00    1.86
   3   4   7   12.21    1.21
  -3   4  -7   12.15    1.72
   3   4   7   11.54    1.42
   7  -5  -7    2.89    0.99
  -7  -5   7    2.16    0.92
  -7  -5   7    3.58    0.95
   7   5  -7    2.90    0.89
  -7   5   7    3.80    1.16
   6  -5  -7    2.56    0.79
  -6  -5   7    3.04    0.81
   6  -5  -7    3.91    0.91
  -6  -5   7    1.27    1.02
  -6  -5   7    2.13    0.54
  -6  -5   7    2.25    0.80
   6   5  -7    2.81    0.76
  -6   5   7    1.97    0.88
  -6   5   7    1.32    0.91
   5  -5  -7   18.11    1.39
  -5  -5   7   17.04    1.30
   5  -5  -7   16.72    1.63
  -5  -5   7   17.41    1.55
  -5  -5   7   17.52    1.41
   5   5  -7   17.60    1.46
  -5   5   7   19.08    1.49
   4  -5  -7    0.02    0.54
   4  -5  -7    1.10    0.87
  -4  -5   7    1.72    0.91
  -4  -5   7    0.16    0.56
  -4  -5   7    0.13    0.61
  -4  -5   7    0.27    0.58
   4   5  -7    0.46    0.61
  -4   5   7    0.49    1.05
  -4   5   7    0.95    0.65
  -3  -5   7    6.65    1.25
   3  -5  -7    7.36    1.24
  -3  -5   7    5.67    1.14
  -3  -5   7    7.58    1.00
   3  -5  -7    5.71    0.73
  -3  -5   7    6.84    1.00
  -3   5   7    5.52    0.77
   3   5  -7    5.91    0.81
   2  -5  -7    8.76    1.20
  -2  -5   7   10.26    1.08
  -2  -5   7    7.90    1.15
  -2  -5   7    7.98    1.13
  -2  -5   7    8.99    1.19
   2  -5  -7    7.57    0.99
   2   5  -7    9.23    1.18
  -2   5   7    6.91    1.04
   1  -5  -7    5.74    0.93
  -1  -5   7    6.27    1.08
  -1  -5   7    4.94    0.95
  -1  -5   7    5.89    1.07
  -1  -5   7    6.72    0.94
   1  -5  -7    5.75    0.95
   1   5  -7    5.32    0.81
  -1   5   7    5.93    0.97
  -1   5   7    5.08    0.87
   0  -5  -7    0.06    0.51
   0  -5  -7    0.60    0.75
   0  -5   7    0.63    0.56
   0  -5   7    0.82    0.72
   0  -5   7    0.54    0.68
   0  -5   7    1.28    0.88
   0   5   7    1.02    0.55
   0   5   7    0.16    0.47
   0   5  -7    1.18    0.69
   0   5   7    0.54    0.58
   0   5  -7    1.52    0.67
   0   5   7   -0.74    0.85
   1  -5   7    0.85    0.71
   1  -5   7    2.23    0.90
   1  -5   7    1.74    0.57
  -1  -5  -7    1.60    0.50
   1  -5   7    2.05    0.75
   1   5   7    0.37    0.94
  -1   5  -7    1.69    0.69
   1   5   7    2.09    0.68
   1   5   7    1.87    0.58
  -1   5  -7    1.49    0.72
   1   5   7    1.32    0.46
   2  -5   7    6.95    1.20
  -2  -5  -7    5.99    0.84
   2  -5   7    5.46    0.72
   2  -5   7   10.71    1.65
   2  -5   7    7.13    1.24
   2   5   7    4.90    0.79
  -2   5  -7    8.46    1.07
  -2   5  -7    8.91    1.42
   2   5   7    7.04    1.16
   2   5   7    5.61    0.93
   3  -5   7   12.52    2.00
  -3  -5  -7   12.12    1.12
   3  -5   7    9.49    1.11
   3  -5   7   16.17    2.12
   3   5   7    8.73    1.02
   3   5   7   11.41    1.19
  -3   5  -7   11.56    1.78
   3   5   7   14.22    1.39
  -7  -6   7    0.30    0.93
   7  -6  -7    0.64    1.07
  -7   6   7   -1.55    0.81
  -7   6   7    1.49    1.17
   6  -6  -7    3.78    0.89
  -6  -6   7    3.64    0.82
  -6  -6   7    3.31    1.02
  -6  -6   7    5.94    0.82
   6  -6  -7    5.55    1.04
  -6  -6   7    3.61    0.90
  -6   6   7    3.00    0.92
   6   6  -7    4.49    0.89
  -5  -6   7    1.65    0.80
   5  -6  -7    0.87    0.65
  -5  -6   7    2.31    0.59
  -5  -6   7    0.29    0.64
   5  -6  -7    1.20    0.88
  -5  -6   7    1.25    0.94
   5   6  -7    1.10    0.68
  -5   6   7    0.30    0.93
  -5   6   7    1.05    0.76
  -4  -6   7    9.65    1.34
   4  -6  -7   11.95    1.32
  -4  -6   7   12.27    1.18
  -4  -6   7    9.83    1.17
  -4  -6   7   10.06    1.33
   4  -6  -7   11.24    1.13
  -4   6   7   11.52    1.27
   4   6  -7   10.77    1.26
  -3  -6   7    6.10    1.22
  -3  -6   7   10.42    1.07
   3  -6  -7    8.97    1.23
  -3  -6   7    8.27    1.09
  -3  -6   7    7.86    1.18
   3  -6  -7    9.03    1.04
   3   6  -7    6.72    0.90
  -3   6   7    8.85    1.15
  -2  -6   7   25.94    1.84
   2  -6  -7   27.82    1.86
   2  -6  -7   27.56    1.59
  -2  -6   7   23.52    1.85
  -2  -6   7   24.48    1.66
  -2  -6   7   27.39    1.65
   2   6  -7   24.75    1.74
  -2   6   7   25.26    1.65
  -1  -6   7    9.03    1.20
  -1  -6   7    7.88    1.24
   1  -6  -7    8.74    1.02
  -1  -6   7    8.51    1.01
  -1  -6   7    7.94    1.19
   1  -6  -7    9.15    1.31
  -1   6   7    6.91    1.01
   1   6  -7    8.24    1.14
  -1   6   7    7.24    0.98
   0  -6  -7    9.88    1.00
   0  -6   7   11.34    1.40
   0  -6   7    9.53    1.24
   0  -6   7    8.53    1.21
   0  -6   7    9.70    1.12
   0  -6  -7    9.80    1.41
   0   6   7    6.76    0.96
   0   6  -7    9.97    1.29
   0   6   7    9.29    1.10
   0   6  -7    9.59    1.20
  -1  -6  -7   11.81    1.00
   1  -6   7   13.04    1.56
   1  -6   7   11.92    1.32
   1  -6   7   14.43    1.50
   1  -6   7   13.31    1.20
   1   6   7   11.18    1.13
  -1   6  -7   10.48    1.20
   1   6   7   14.22    1.25
  -1   6  -7   15.09    1.44
   1   6   7    9.64    1.00
  -2  -6  -7   -0.16    0.43
   2  -6   7    0.96    1.05
   2  -6   7    1.43    0.97
   2  -6   7   -0.47    0.70
   2  -6   7    0.08    0.53
   2   6   7   -0.99    0.87
   2   6   7    0.07    0.69
   2   6   7    0.55    0.52
  -2   6  -7    0.14    0.79
   2   6   7   -0.39    0.44
   3  -6   7    2.03    0.62
  -3  -6  -7    2.88    0.62
   3  -6   7    2.11    1.33
   3  -6   7    5.12    1.39
  -3   6  -7    1.37    1.11
   3   6   7    0.98    0.57
   3   6   7    2.31    0.71
  -6  -7   7    4.04    0.97
  -6  -7   7    3.16    0.83
   6  -7  -7    4.04    0.89
   6   7  -7    4.17    0.87
  -6   7   7    3.09    0.93
  -5  -7   7    6.16    0.97
   5  -7  -7    7.08    1.11
  -5  -7   7    4.10    0.92
  -5  -7   7    6.08    1.00
  -5  -7   7    4.57    0.77
   5  -7  -7    5.39    0.79
   5   7  -7    5.69    0.91
  -5   7   7    5.35    0.91
   4  -7  -7    0.02    0.59
  -4  -7   7    0.01    0.62
   4  -7  -7    0.40    0.93
  -4  -7   7    0.47    0.56
  -4  -7   7    0.54    0.78
  -4  -7   7    0.19    0.75
  -4   7   7   -0.15    0.92
  -4   7   7    0.19    0.65
   4   7  -7    0.20    0.71
  -3  -7   7   24.31    1.83
   3  -7  -7   25.11    1.53
  -3  -7   7   24.08    1.85
  -3  -7   7   22.39    1.63
  -3  -7   7   24.80    1.61
   3  -7  -7   24.95    1.92
   3   7  -7   21.46    1.68
  -3   7   7   24.37    1.69
  -2  -7   7   12.40    1.29
   2  -7  -7   10.32    1.09
   2  -7  -7   12.91    1.47
  -2  -7   7   10.05    1.36
  -2  -7   7    8.43    1.39
  -2  -7   7   11.27    1.16
   2   7  -7   11.19    1.31
  -2   7   7   10.35    1.17
  -1  -7   7    5.55    1.01
   1  -7  -7    6.30    1.09
  -1  -7   7    6.20    0.96
   1  -7  -7    5.43    0.70
  -1  -7   7    5.11    0.83
  -1  -7   7    4.73    0.74
  -1   7   7    6.17    1.05
   1   7  -7    5.11    0.83
   1   7  -7    4.88    0.82
  -1   7   7    5.54    0.74
   0  -7  -7    2.85    0.59
   0  -7   7    3.99    0.98
   0  -7  -7    4.35    1.01
   0  -7   7    4.43    0.76
   0  -7   7    3.60    0.86
   0  -7   7    3.73    0.82
   0   7  -7    3.07    0.74
   0   7   7    4.16    0.74
   0   7   7    3.05    0.60
   0   7  -7    4.90    0.81
   1  -7   7   16.01    1.53
   1  -7   7   13.79    1.65
  -1  -7  -7   13.60    1.09
  -1  -7  -7   15.36    1.61
   1  -7   7   17.38    1.38
   1  -7   7   19.36    1.65
  -1   7  -7   16.74    1.37
   1   7   7   14.61    1.15
   1   7   7   14.58    1.35
  -1   7  -7   15.50    1.46
   1   7   7   14.67    1.23
  -1   7  -7   16.62    1.52
   2  -7   7    3.92    0.83
   2  -7   7    4.26    1.19
   2  -7   7    4.75    0.75
  -2  -7  -7    3.61    0.59
   2   7   7    5.75    0.83
   2   7   7    4.99    0.91
   2   7   7    3.90    0.61
  -2   7  -7    5.10    0.98
  -2   7  -7    4.03    0.86
  -3  -7  -7    6.19    1.08
   3  -7   7    3.58    0.76
   3  -7   7    6.30    1.49
  -3   7  -7    5.33    1.25
   3   7   7    3.05    0.68
   3   7   7    4.43    0.84
   6  -8  -7    5.54    1.23
  -6  -8   7    5.13    1.05
   6  -8  -7    3.60    0.96
  -6  -8   7    3.04    1.12
  -6  -8   7    4.57    0.94
  -6  -8   7    5.31    0.87
  -6   8   7    4.42    0.99
  -5  -8   7   -0.48    0.72
  -5  -8   7   -0.65    0.46
  -5  -8   7    0.58    0.86
  -5  -8   7   -0.23    0.69
   5  -8  -7   -0.65    0.62
   5  -8  -7   -1.44    0.83
  -5   8   7   -0.34    0.70
   5   8  -7   -0.12    0.74
  -4  -8   7    2.02    0.67
   4  -8  -7    1.79    0.62
  -4  -8   7    2.32    0.88
  -4  -8   7    2.05    0.64
   4  -8  -7    3.02    0.97
  -4  -8   7    1.67    0.86
   4   8  -7    2.02    0.75
  -4   8   7    2.55    0.75
  -3  -8   7    8.19    1.16
  -3  -8   7    7.73    1.27
   3  -8  -7    9.97    1.40
  -3  -8   7    6.96    1.33
   3  -8  -7    8.85    1.09
  -3  -8   7    9.58    1.17
   3   8  -7   10.35    1.29
  -3   8   7    6.94    0.94
  -2  -8   7    0.89    0.77
  -2  -8   7    0.58    0.67
   2  -8  -7    0.79    0.57
   2  -8  -7   -0.16    0.96
  -2  -8   7    0.99    0.78
  -2  -8   7    0.69    0.64
  -2   8   7    0.46    0.62
  -2   8   7   -0.97    0.93
   2   8  -7    0.11    0.66
  -1  -8   7   -0.98    0.67
   1  -8  -7    0.34    0.50
  -1  -8   7    0.59    0.80
  -1  -8   7   -0.25    0.61
   1  -8  -7    0.07    0.95
  -1  -8   7    0.20    0.65
   1   8  -7    0.58    0.70
  -1   8   7    0.36    0.56
  -1   8   7   -0.95    0.88
   1   8  -7   -0.53    0.67
   0  -8   7   14.30    1.52
   0  -8   7   13.01    1.46
   0  -8   7   15.39    1.25
   0  -8  -7   12.48    1.09
   0  -8   7   12.71    1.39
   0  -8  -7   12.77    1.64
   0   8  -7   11.04    1.30
   0   8   7   11.58    1.28
   0   8  -7   13.54    1.43
   0   8   7   13.32    1.15
   0   8  -7   15.70    1.41
  -1  -8  -7    3.63    0.57
  -1  -8  -7    4.51    1.03
   1  -8   7    5.68    1.09
   1  -8   7    3.83    0.73
   1  -8   7    4.05    0.90
  -1   8  -7    3.62    0.86
   1   8   7    3.32    0.60
  -1   8  -7    3.42    0.83
   1   8   7    5.49    0.89
   1   8   7    4.56    0.79
   2  -8   7    7.51    1.32
   2  -8   7    4.74    0.77
   2  -8   7    5.97    1.28
  -2  -8  -7    6.81    0.91
   2  -8   7    8.46    1.29
  -2   8  -7    5.18    0.96
   2   8   7    6.16    0.87
  -2   8  -7    5.99    1.05
   2   8   7    6.34    0.98
   2   8   7    4.87    0.70
  -6  -9   7    4.03    1.21
  -6  -9   7    1.48    0.89
   6  -9  -7    1.30    0.93
  -6   9   7    1.56    0.93
  -6   9   7    1.82    0.92
  -5  -9   7    2.91    0.82
  -5  -9   7    5.56    1.10
  -5  -9   7    4.00    0.84
   5  -9  -7    4.76    1.16
   5  -9  -7    2.92    0.75
  -5   9   7    4.07    0.89
   5   9  -7    4.70    0.94
  -4  -9   7    1.25    0.89
  -4  -9   7    1.75    0.62
   4  -9  -7   -0.16    0.98
  -4  -9   7    0.92    0.73
  -4  -9   7    1.61    0.72
   4  -9  -7    0.55    0.61
   4   9  -7    1.77    0.80
  -4   9   7    0.83    0.65
  -3  -9   7    3.32    0.74
   3  -9  -7    6.04    1.18
  -3  -9   7    4.86    0.99
  -3  -9   7    4.87    0.78
  -3  -9   7    2.55    0.90
   3  -9  -7    3.34    0.65
   3   9  -7    4.39    0.88
  -3   9   7    3.97    0.78
  -2  -9   7    1.39    0.80
  -2  -9   7    1.86    0.83
   2  -9  -7    2.36    0.61
  -2  -9   7    1.69    0.69
  -2  -9   7    1.83    0.68
   2  -9  -7    2.88    1.07
   2   9  -7    1.58    0.74
  -2   9   7   -0.34    0.95
  -2   9   7    2.47    0.70
   1  -9  -7    8.38    1.01
  -1  -9   7   10.02    1.25
   1  -9  -7    8.32    1.51
  -1  -9   7    9.54    1.40
  -1  -9   7    8.21    1.35
  -1  -9   7   11.45    1.18
  -1   9   7    7.64    1.08
   1   9  -7    7.49    1.29
   1   9  -7    9.32    1.24
   1   9  -7    7.86    1.28
   0  -9  -7    0.17    0.49
   0  -9   7    0.59    0.62
   0  -9   7    0.84    0.71
   0  -9  -7    1.56    1.08
   0  -9   7    2.87    0.79
   0  -9   7    1.21    0.92
   0   9   7    0.15    0.54
   0   9   7   -0.07    0.72
   0   9  -7    0.76    0.78
   0   9   7    0.15    0.97
   0   9  -7    0.20    0.70
   1  -9   7    5.17    0.78
  -1  -9  -7    4.77    1.10
   1  -9   7    6.34    1.23
   1  -9   7    4.04    1.09
  -1  -9  -7    5.01    0.86
  -1   9  -7    4.26    0.91
   1   9   7    5.34    0.94
  -1   9  -7    5.08    0.90
   1   9   7    4.56    0.88
   1   9   7    5.69    0.82
   2  -9   7    0.77    1.17
   2  -9   7    1.04    0.66
   2  -9   7    4.02    1.29
  -2  -9  -7    0.15    0.54
   2   9   7   -0.26    0.61
  -2   9  -7   -0.60    0.76
   2   9   7   -1.02    1.03
   2   9   7    0.08    0.57
  -2   9  -7    0.61    0.94
  -5 -10   7   -0.52    0.82
  -5 -10   7    0.19    0.98
  -5 -10   7   -0.63    0.49
   5 -10  -7   -0.91    0.68
   5 -10  -7   -1.07    1.03
  -5  10   7    0.22    0.93
  -5  10   7   -0.49    0.78
   5  10  -7    2.29    0.91
   4 -10  -7    1.98    1.11
  -4 -10   7    3.10    0.68
  -4 -10   7    2.31    0.99
   4 -10  -7    2.69    0.71
  -4 -10   7    2.29    0.76
  -4 -10   7    2.86    0.79
  -4  10   7    4.24    0.84
   4  10  -7    3.52    0.92
   3 -10  -7    9.41    1.60
   3 -10  -7   10.93    1.12
  -3 -10   7    9.15    1.33
  -3 -10   7    8.57    1.19
  -3 -10   7   11.06    1.26
  -3 -10   7   10.35    1.64
  -3  10   7   12.25    1.31
   3  10  -7   12.85    1.48
  -2 -10   7    7.17    1.29
   2 -10  -7    8.90    1.31
  -2 -10   7    8.00    1.27
   2 -10  -7    7.85    1.00
  -2 -10   7    9.37    1.21
  -2 -10   7    8.20    1.38
  -2  10   7    7.46    0.93
   2  10  -7    8.54    1.32
   2  10  -7    6.94    1.17
  -1 -10   7    3.54    0.90
  -1 -10   7    3.12    0.91
   1 -10  -7    2.85    0.62
  -1 -10   7    4.40    0.79
   1 -10  -7    3.28    1.17
  -1 -10   7    3.60    0.77
   1  10  -7    4.03    0.80
  -1  10   7    2.41    0.69
   1  10  -7    3.23    0.91
   0 -10  -7    4.01    0.65
   0 -10  -7    5.71    1.23
   0 -10   7    5.58    0.99
   0 -10   7    5.50    0.82
   0 -10   7    5.43    1.03
   0  10   7    3.97    0.85
   0  10  -7    3.39    0.82
   0  10   7    3.86    0.67
   0  10  -7    3.50    0.92
  -1 -10  -7    5.32    1.25
   1 -10   7    8.88    1.61
  -1 -10  -7    6.83    0.90
   1  10   7    6.07    1.04
  -1  10  -7    6.73    0.99
  -1  10  -7    6.65    1.23
   1  10   7    5.24    0.88
  -5 -11   7   -0.39    0.86
   5 -11  -7   -1.16    1.13
  -5 -11   7   -0.81    0.77
  -5 -11   7    1.63    1.12
  -5  11   7   -0.94    0.93
  -5  11   7   -0.66    0.78
   4 -11  -7   -1.04    0.62
  -4 -11   7    1.55    0.62
  -4 -11   7   -0.73    0.62
  -4 -11   7    1.65    1.06
   4 -11  -7   -0.91    1.08
  -4 -11   7    0.19    0.82
  -4  11   7   -0.45    0.71
  -4  11   7   -0.85    0.97
  -3 -11   7    3.09    1.09
   3 -11  -7    0.99    0.62
  -3 -11   7   -0.26    0.76
   3 -11  -7   -0.04    1.19
  -3 -11   7    1.98    0.80
  -3 -11   7    2.56    0.70
  -3  11   7    0.60    1.03
  -3  11   7    1.28    0.71
  -2 -11   7    8.00    1.15
   2 -11  -7    5.49    1.30
  -2 -11   7    5.92    1.19
   2 -11  -7    4.53    0.75
  -2 -11   7    4.85    0.94
  -2 -11   7    5.71    0.91
   2  11  -7    6.06    0.87
  -2  11   7    5.71    0.84
  -1 -11   7    5.71    1.13
  -1 -11   7    6.80    1.29
  -1 -11   7    7.45    1.28
   1 -11  -7    6.14    1.38
  -1 -11   7    9.23    1.23
   1 -11  -7    6.38    1.00
  -1  11   7    5.63    0.84
   1  11  -7    5.55    0.88
   1  11  -7    5.39    1.06
   0 -11  -7    1.19    0.52
   0 -11   7    3.86    0.81
   0 -11  -7    3.63    1.30
   0 -11   7    3.68    0.84
   0 -11   7    1.89    0.93
   0  11  -7    2.16    0.89
   0  11   7    2.13    0.65
   0  11  -7    1.82    0.78
   0  11   7    1.52    0.86
   0  11   7   -0.60    1.17
   1 -11   7    9.36    1.64
  -1 -11  -7    5.69    1.44
   1 -11   7    8.17    1.22
  -1 -11  -7    6.14    0.90
  -1  11  -7    5.40    1.03
  -1  11  -7    7.52    1.21
   1  11   7    5.13    0.82
   1  11   7    4.14    0.98
  -4 -12   7    1.59    1.25
  -4 -12   7    0.53    0.66
   4 -12  -7   -1.67    1.32
  -4 -12   7    1.02    0.92
  -4  12   7    1.30    1.12
  -4  12   7   -0.41    0.71
  -3 -12   7    2.81    1.23
   3 -12  -7    1.91    1.37
  -3 -12   7    1.91    0.84
  -3 -12   7    2.33    0.90
  -3  12   7    3.24    0.80
   2 -12  -7   12.67    1.68
   2 -12  -7   11.50    1.23
  -2 -12   7   11.90    1.52
  -2 -12   7   10.07    1.36
  -2 -12   7   14.75    1.38
  -2 -12   7   12.90    1.93
   2  12  -7   10.12    1.74
   2  12  -7    9.47    1.30
  -2  12   7   10.96    1.32
   1 -12  -7    2.25    1.42
  -1 -12   7    4.01    0.90
  -1 -12   7    4.98    1.16
   1  12  -7    2.49    0.81
  -1  12   7    0.15    1.24
  -1  12   7    3.49    0.72
   1  12  -7    2.18    1.00
   0 -12   7   18.99    1.56
   0 -12   7   17.24    1.84
   0 -12  -7   16.27    2.16
   0 -12   7   17.47    1.80
   0  12  -7   16.36    1.73
   0  12   7   15.08    1.39
   0  12  -7   13.55    1.49
  -3 -13   7    2.87    1.06
  -3 -13   7    1.31    0.75
   3 -13  -7    1.13    1.52
  -3 -13   7    3.25    1.38
  -3  13   7    1.69    1.35
   2 -13  -7    0.10    1.58
  -2 -13   7    4.28    1.40
  -2 -13   7    1.19    0.86
  -2 -13   7    2.20    0.96
   2  13  -7    0.50    1.15
   2  13  -7    1.57    0.72
  -2  13   7    1.48    1.40
  -2  13   7    1.02    0.68
  -1 -13   7   14.30    1.62
  -1 -13   7   14.25    1.61
   1 -13  -7   14.32    1.87
  -1 -13   7   16.69    2.19
   1  13  -7   11.43    1.46
   1  13  -7   10.56    1.88
  -1  13   7   11.20    1.31
  -7   0   8   14.87    1.93
   7   0  -8   12.46    1.87
  -7   0   8   11.67    1.93
  -6   0   8    0.04    0.83
  -6   0   8    1.64    0.87
   6   0  -8    1.88    0.84
   6   0  -8    2.34    0.80
  -6   0   8    0.92    0.59
  -5   0   8    3.90    0.80
  -5   0   8    6.71    1.29
  -5   0   8    3.76    0.70
  -5   0   8    5.94    0.92
   5   0  -8    4.01    0.86
   5   0  -8    3.97    0.78
   4   0  -8   18.18    1.41
  -4   0   8   19.23    1.45
  -4   0   8   17.75    1.37
   4   0  -8   15.13    1.58
  -4   0   8   18.88    1.55
  -3   0   8    1.43    0.71
   3   0  -8    2.85    0.68
  -3   0   8    4.53    1.11
  -3   0   8    1.80    0.65
  -3   0   8    2.53    0.64
   3   0  -8    2.30    0.77
  -2   0   8   19.50    1.59
  -2   0   8   20.87    1.45
   2   0  -8   20.62    1.48
  -2   0   8   22.12    1.74
  -2   0   8   17.88    1.43
  -1   0   8    0.38    0.54
  -1   0   8   -0.38    0.93
  -1   0   8    0.14    0.64
   1   0  -8    0.23    0.58
  -1   0   8    0.93    0.65
   0   0  -8    1.12    0.61
   0   0   8    0.69    0.93
   0   0   8    0.37    0.59
   0   0   8    0.96    0.50
   0   0   8    0.93    0.73
   1   0   8   -0.11    0.59
   1   0   8   -0.60    0.43
  -1   0  -8    0.69    0.62
   1   0   8   -0.39    0.97
   1   0   8    0.67    0.85
   2   0   8   -0.64    0.39
   2   0   8    1.42    1.06
   2   0   8   -1.02    1.12
   2   0   8    0.03    0.57
  -7  -1   8    0.50    1.09
  -7   1   8    0.91    1.10
  -6  -1   8   10.82    1.14
   6  -1  -8   10.67    1.56
  -6  -1   8   14.07    1.65
  -6  -1   8    9.25    1.14
   6  -1  -8   11.11    1.41
   6   1  -8   13.60    1.58
  -6   1   8    9.89    1.52
   6   1  -8   10.98    1.32
  -6   1   8   11.10    1.08
  -5  -1   8    5.63    0.91
   5  -1  -8    4.96    0.85
   5  -1  -8    5.37    0.96
  -5  -1   8    6.62    0.94
  -5  -1   8    4.74    0.80
   5   1  -8    5.40    0.85
   5   1  -8    4.95    0.87
  -5   1   8    5.37    0.73
  -5   1   8    5.56    0.88
   4  -1  -8   15.95    1.49
  -4  -1   8   19.83    1.83
  -4  -1   8   16.91    1.47
   4  -1  -8   15.66    1.38
  -4  -1   8   14.37    1.25
  -4  -1   8   16.56    1.34
  -4   1   8   14.57    1.32
  -4   1   8   14.17    1.29
   4   1  -8   16.65    1.52
  -4   1   8   17.13    1.45
   4   1  -8   16.64    1.41
  -3  -1   8   29.18    2.04
  -3  -1   8   31.42    1.85
  -3  -1   8   30.92    1.86
  -3  -1   8   33.33    2.28
   3  -1  -8   29.23    1.87
   3  -1  -8   28.65    2.13
  -3   1   8   30.22    1.85
  -3   1   8   35.66    2.40
  -3   1   8   31.35    1.85
   3   1  -8   32.48    1.92
  -3   1   8   30.39    2.04
  -2  -1   8   -0.63    0.95
  -2  -1   8   -0.05    0.60
   2  -1  -8    0.27    0.57
  -2  -1   8    0.60    0.56
  -2  -1   8    0.30    0.63
   2  -1  -8    0.14    0.72
  -2   1   8   -0.48    0.58
  -2   1   8    0.88    0.55
  -2   1   8    1.19    1.05
  -2   1   8    0.51    0.60
   2   1  -8   -0.18    0.59
  -1  -1   8    9.65    1.26
  -1  -1   8   10.45    1.24
   1  -1  -8   10.45    1.19
  -1  -1   8   12.84    1.54
  -1  -1   8   11.14    1.08
  -1   1   8   10.12    1.24
  -1   1   8   11.08    1.08
  -1   1   8   12.11    1.28
   1   1  -8   10.15    1.20
  -1   1   8   12.07    1.57
   0  -1   8    1.19    0.75
   0  -1   8    1.05    0.55
   0  -1  -8    1.29    0.65
   0  -1   8    1.26    0.68
   0  -1   8    0.56    0.97
   0   1   8    0.90    0.65
   0   1  -8    1.58    0.63
   0   1   8    0.53    0.99
   0   1   8    1.94    0.52
   0   1   8    2.06    0.76
   1  -1   8   -1.46    1.04
   1  -1   8    0.32    0.59
   1  -1   8   -0.31    0.43
   1  -1   8    0.14    0.88
  -1  -1  -8   -0.04    0.58
   1   1   8   -0.12    0.80
  -1   1  -8    0.47    0.59
   1   1   8    0.04    0.56
   1   1   8    0.51    0.48
   2  -1   8    0.47    0.62
  -2  -1  -8    1.27    0.52
   2  -1   8    0.80    0.99
   2  -1   8   -1.79    1.18
   2   1   8    0.31    0.43
   2   1   8    0.60    0.94
   2   1   8    1.72    0.59
   2   1   8   -0.98    1.15
  -6  -2   8   -0.07    0.81
   6  -2  -8    1.75    0.83
  -6  -2   8    1.85    0.54
  -6  -2   8    2.97    1.13
  -6  -2   8    1.85    0.92
   6  -2  -8    2.30    0.80
   6   2  -8    2.76    0.93
  -6   2   8    0.13    0.83
   6   2  -8    2.77    0.72
   5  -2  -8    6.87    0.88
  -5  -2   8    6.88    1.34
  -5  -2   8    5.53    0.83
  -5  -2   8    6.33    0.99
  -5  -2   8    8.49    1.55
   5  -2  -8    7.00    1.31
  -5   2   8    8.32    1.00
  -5   2   8    4.91    0.87
   5   2  -8    7.36    1.15
   5   2  -8    8.24    1.31
  -4  -2   8    3.49    0.68
  -4  -2   8    2.33    0.67
  -4  -2   8    3.51    0.80
   4  -2  -8    1.97    0.84
  -4  -2   8    3.98    1.18
   4  -2  -8    2.97    0.71
  -4   2   8    3.30    0.67
  -4   2   8    1.41    1.16
  -4   2   8    3.14    0.71
   4   2  -8    4.46    0.78
  -3  -2   8    9.00    1.50
  -3  -2   8    8.75    1.24
  -3  -2   8   10.28    1.16
   3  -2  -8    6.85    1.30
  -3  -2   8    7.13    1.05
   3  -2  -8    8.85    1.10
   3   2  -8    7.91    1.15
  -3   2   8    8.86    1.08
  -3   2   8    8.12    1.10
  -3   2   8    7.08    1.06
   2  -2  -8    6.25    1.27
  -2  -2   8    9.08    1.08
  -2  -2   8    8.77    1.20
   2  -2  -8    5.62    1.02
  -2  -2   8    8.25    1.15
  -2  -2   8    9.21    1.46
  -2   2   8    9.63    1.14
  -2   2   8    8.27    1.61
  -2   2   8   10.09    1.04
  -2   2   8    6.93    1.02
   2   2  -8    8.01    0.94
  -1  -2   8   -0.10    0.53
  -1  -2   8    0.05    0.65
  -1  -2   8   -0.34    0.64
   1  -2  -8    0.15    0.56
  -1  -2   8    0.58    0.92
  -1   2   8    0.63    0.93
  -1   2   8    0.35    0.66
   1   2  -8    0.77    0.62
  -1   2   8   -0.26    0.51
  -1   2   8   -0.33    0.60
   0  -2   8    1.96    0.56
   0  -2  -8    1.55    0.62
   0  -2   8    2.21    0.78
   0  -2   8    0.82    0.93
   0  -2   8    2.25    0.74
   0   2   8    2.22    0.75
   0   2   8    1.37    0.51
   0   2   8    1.26    1.01
   0   2   8    1.74    0.68
   0   2  -8    1.81    0.69
   1  -2   8   -0.63    0.95
   1  -2   8   -0.64    0.46
   1  -2   8    0.75    0.89
  -1  -2  -8    0.32    0.56
   1  -2   8    0.42    0.66
   1   2   8   -0.40    0.53
   1   2   8    0.72    0.86
   1   2   8   -1.04    1.02
  -1   2  -8   -0.17    0.62
   1   2   8   -0.54    0.43
   2  -2   8   -0.38    0.46
   2  -2   8    0.64    0.64
  -2  -2  -8    0.78    0.49
   2  -2   8    0.84    1.12
   2  -2   8    0.17    1.23
   2   2   8    0.79    0.53
   2   2   8    0.52    0.96
   2   2   8   -1.02    1.07
  -6  -3   8    3.22    0.97
   6  -3  -8    3.39    0.88
  -6  -3   8    1.37    1.11
  -6  -3   8    1.97    0.85
   6   3  -8    2.61    0.93
  -6   3   8    1.30    0.88
   5  -3  -8    0.30    0.65
   5  -3  -8    0.59    0.81
  -5  -3   8   -1.11    0.63
  -5  -3   8   -0.20    1.06
  -5  -3   8    0.82    0.82
  -5  -3   8    0.63    0.55
   5   3  -8    0.02    0.74
  -5   3   8   -0.41    0.64
  -5   3   8    1.12    1.04
   4  -3  -8    6.46    1.01
  -4  -3   8    6.73    1.26
  -4  -3   8    6.64    1.09
   4  -3  -8    5.05    0.76
  -4  -3   8    4.65    1.12
  -4  -3   8    5.11    0.75
   4   3  -8    6.64    1.16
  -4   3   8    5.67    0.82
  -4   3   8    5.05    0.75
  -3  -3   8    9.33    1.13
   3  -3  -8    9.32    1.07
  -3  -3   8   10.94    1.53
  -3  -3   8    8.85    1.15
   3  -3  -8    9.56    1.30
  -3  -3   8   11.25    1.32
   3   3  -8    8.87    1.20
  -3   3   8    9.04    1.10
  -3   3   8    8.60    1.13
  -2  -3   8    0.36    0.58
   2  -3  -8    0.41    0.60
  -2  -3   8    2.03    0.68
  -2  -3   8    0.83    0.67
   2  -3  -8    0.02    0.79
  -2  -3   8    0.12    0.93
  -2   3   8    1.50    0.64
  -2   3   8    0.98    0.62
   2   3  -8    1.12    0.66
  -2   3   8    1.05    0.59
  -2   3   8    1.88    1.18
  -1  -3   8   11.98    1.13
  -1  -3   8   11.42    1.53
  -1  -3   8   11.66    1.27
  -1  -3   8   10.25    1.24
   1  -3  -8   12.30    1.43
   1  -3  -8    9.24    1.04
  -1   3   8   11.39    1.05
  -1   3   8   12.15    1.22
   1   3  -8   11.53    1.23
  -1   3   8   12.52    1.27
  -1   3   8   11.79    1.66
   0  -3   8    4.39    1.00
   0  -3   8    4.16    0.66
   0  -3   8    4.01    0.83
   0  -3  -8    3.92    0.67
   0  -3   8    5.47    0.90
   0   3   8    4.83    0.83
   0   3  -8    4.47    0.79
   0   3   8    3.41    0.80
   0   3   8    5.75    1.04
   0   3   8    4.29    1.20
   1  -3   8    0.21    0.98
   1  -3   8    0.50    0.49
   1  -3   8    0.47    0.66
  -1  -3  -8    1.22    0.57
   1  -3   8    1.56    0.91
   1   3   8    0.12    1.06
   1   3   8    0.73    0.45
   1   3   8    1.03    0.84
   1   3   8    0.24    0.54
  -1   3  -8    1.49    0.65
  -2  -3  -8    1.35    0.54
   2  -3   8    3.03    1.16
   2  -3   8   -1.09    1.22
   2  -3   8    0.01    0.46
   2   3   8   -1.15    1.19
   2   3   8    1.26    0.61
   2   3   8    1.01    0.98
   2   3   8   -0.06    0.46
  -6  -4   8    0.54    1.07
  -6  -4   8    0.32    0.89
  -6  -4   8   -0.53    0.81
   6  -4  -8   -0.46    0.81
  -6  -4   8    0.41    0.56
   6  -4  -8    1.52    0.82
  -6   4   8   -0.68    0.85
  -6   4   8    0.60    0.99
   6   4  -8    0.47    0.90
  -5  -4   8    2.88    0.89
  -5  -4   8    1.88    0.65
  -5  -4   8    1.30    0.72
  -5  -4   8    3.71    1.06
   5  -4  -8    1.97    0.70
  -5   4   8    2.47    0.79
   5   4  -8    3.25    0.87
   4  -4  -8    6.48    1.27
   4  -4  -8    3.77    0.71
  -4  -4   8    5.39    0.92
  -4  -4   8    4.19    0.74
  -4  -4   8    5.92    0.76
  -4  -4   8    4.37    1.07
   4   4  -8    4.14    0.81
  -4   4   8    3.71    0.77
  -3  -4   8    1.54    0.72
  -3  -4   8    0.76    0.97
  -3  -4   8    1.34    0.63
  -3  -4   8    2.36    0.63
   3  -4  -8    2.87    0.88
   3  -4  -8    1.69    0.61
   3   4  -8    1.50    0.72
  -3   4   8   -0.04    1.06
  -3   4   8    0.97    0.65
  -3   4   8    0.89    0.63
   2  -4  -8    2.66    0.91
  -2  -4   8    1.31    0.99
  -2  -4   8    3.97    0.84
  -2  -4   8    3.24    0.66
   2  -4  -8    3.28    0.70
  -2  -4   8    2.90    0.75
   2   4  -8    2.63    0.74
  -2   4   8    3.14    0.68
  -2   4   8    3.10    0.69
  -1  -4   8    2.27    0.60
   1  -4  -8    1.91    0.83
  -1  -4   8    2.90    0.79
   1  -4  -8    1.03    0.58
  -1  -4   8    1.44    0.93
  -1  -4   8    1.79    0.74
  -1   4   8    1.59    0.69
  -1   4   8    1.64    0.56
  -1   4   8    1.11    1.10
   1   4  -8    1.66    0.70
  -1   4   8    2.28    0.64
   0  -4   8    0.67    0.56
   0  -4   8   -0.06    0.78
   0  -4   8   -0.91    0.83
   0  -4  -8    1.03    0.55
   0  -4   8    1.53    0.72
   0   4   8   -0.13    0.58
   0   4   8    0.05    0.47
   0   4   8    0.48    0.75
   0   4  -8   -0.52    0.60
   0   4   8    0.78    1.13
   1  -4   8    1.58    0.69
   1  -4   8    1.33    0.55
   1  -4   8    0.18    1.00
   1  -4   8    1.50    0.96
  -1  -4  -8    1.11    0.53
   1   4   8    0.57    0.46
   1   4   8    0.07    1.14
   1   4   8    0.97    0.84
  -1   4  -8    1.70    0.62
   1   4   8    2.02    0.58
  -2  -4  -8    1.44    0.58
   2  -4   8    0.45    1.28
   2  -4   8    0.23    0.51
   2  -4   8    2.93    1.26
   2   4   8   -0.51    1.20
   2   4   8    1.56    0.66
   2   4   8    1.39    0.93
  -6  -5   8    0.99    1.16
  -6  -5   8    1.66    0.95
   6  -5  -8    1.13    0.87
  -6  -5   8    1.08    0.89
  -6   5   8    0.80    0.89
   6   5  -8    0.97    0.97
  -6   5   8    0.06    0.94
  -5  -5   8    6.55    0.94
  -5  -5   8    3.35    1.06
  -5  -5   8    5.85    1.02
  -5  -5   8    4.34    0.85
   5  -5  -8    3.52    0.80
   5  -5  -8    6.93    1.04
  -5   5   8    5.45    0.91
   5   5  -8    5.31    0.97
   4  -5  -8    6.02    1.02
   4  -5  -8    4.13    0.74
  -4  -5   8    4.20    0.74
  -4  -5   8    5.43    0.94
  -4  -5   8    6.73    0.93
  -4  -5   8    5.03    1.03
   4   5  -8    4.54    0.85
  -4   5   8    4.91    0.81
  -3  -5   8   12.94    1.28
   3  -5  -8   14.55    1.18
  -3  -5   8   15.63    1.35
   3  -5  -8   15.51    1.62
  -3  -5   8   13.04    1.57
  -3  -5   8   14.16    1.51
  -3   5   8   12.06    1.27
   3   5  -8   14.31    1.44
   2  -5  -8    2.54    0.64
  -2  -5   8    2.52    0.65
   2  -5  -8    3.80    1.00
  -2  -5   8    3.29    0.98
  -2  -5   8    2.43    0.79
  -2  -5   8    2.58    0.75
  -2   5   8    2.02    0.67
   2   5  -8    2.27    0.77
  -2   5   8    2.33    0.74
   1  -5  -8    0.95    0.94
  -1  -5   8    2.68    0.75
  -1  -5   8    3.56    0.84
  -1  -5   8    2.75    0.62
   1  -5  -8    1.94    0.62
  -1  -5   8    1.33    0.87
   1   5  -8    2.33    0.72
  -1   5   8    1.81    0.68
  -1   5   8    1.87    0.64
  -1   5   8    1.55    0.56
   0  -5   8    2.01    0.92
   0  -5   8    3.50    0.67
   0  -5   8    3.58    0.89
   0  -5  -8    4.11    1.01
   0  -5   8    2.58    0.79
   0  -5  -8    2.08    0.59
   0   5   8    2.77    0.65
   0   5   8    2.97    0.80
   0   5  -8    4.86    0.78
   0   5   8    2.54    0.59
   0   5   8    0.08    1.08
   1  -5   8    0.33    0.53
  -1  -5  -8    0.75    0.53
   1  -5   8   -0.70    0.65
   1  -5   8    2.10    1.04
   1  -5   8    0.18    1.01
   1   5   8   -0.82    1.09
  -1   5  -8    0.32    0.63
   1   5   8    0.31    0.47
   1   5   8    1.17    0.86
   1   5   8    1.67    0.57
   2  -5   8   -1.37    1.29
   2  -5   8    0.52    0.51
   2  -5   8    2.68    1.30
   2   5   8   -1.80    1.10
  -2   5  -8   -1.67    1.04
  -6  -6   8    0.29    0.91
   6  -6  -8   -0.19    0.89
  -6  -6   8    0.49    1.04
  -6  -6   8    0.38    1.01
  -6   6   8   -0.33    0.94
  -6   6   8    0.27    0.88
   6   6  -8    1.62    1.04
   5  -6  -8    2.04    0.90
   5  -6  -8    1.14    0.72
  -5  -6   8    1.89    1.02
  -5  -6   8    2.16    0.84
  -5  -6   8    2.75    0.98
   5   6  -8    2.64    0.95
  -5   6   8    1.17    0.77
  -4  -6   8    2.76    0.90
   4  -6  -8    4.90    1.03
  -4  -6   8    2.97    0.92
  -4  -6   8    3.25    0.68
  -4  -6   8    2.26    0.71
   4  -6  -8    3.67    0.72
   4   6  -8    3.46    0.86
  -4   6   8    2.80    0.72
  -3  -6   8    2.38    0.67
   3  -6  -8    1.14    0.58
   3  -6  -8    3.75    1.04
  -3  -6   8    0.89    0.79
  -3  -6   8    1.49    0.83
  -3  -6   8    2.10    0.69
  -3   6   8   -0.60    1.03
  -3   6   8    1.20    0.66
   3   6  -8    1.66    0.76
  -2  -6   8    8.15    1.13
  -2  -6   8    7.07    1.06
   2  -6  -8    8.97    1.24
   2  -6  -8    6.93    1.01
  -2  -6   8    5.09    1.00
  -2  -6   8    7.86    1.29
  -2   6   8    5.73    0.81
   2   6  -8    7.31    1.19
  -2   6   8    6.29    0.85
   1  -6  -8    3.31    1.08
  -1  -6   8    3.97    0.84
  -1  -6   8    1.96    0.92
   1  -6  -8    2.88    0.65
  -1  -6   8    2.83    0.67
  -1  -6   8    3.76    0.81
  -1   6   8    2.80    0.80
  -1   6   8    1.80    0.59
   1   6  -8    3.39    0.79
   0  -6   8    1.84    1.01
   0  -6  -8    2.53    0.63
   0  -6  -8    4.09    1.04
   0  -6   8    3.75    0.85
   0  -6   8    4.06    0.69
   0  -6   8    4.51    0.93
   0   6   8    3.60    0.68
   0   6  -8    4.88    0.78
   0   6   8    3.41    0.85
   0   6   8    2.78    0.63
   1  -6   8    0.44    0.57
   1  -6   8   -1.11    0.66
   1  -6   8    0.12    1.06
   1  -6   8    2.84    1.13
  -1  -6  -8    0.27    0.48
   1   6   8    0.45    0.55
   1   6   8   -1.10    1.11
   1   6   8   -0.93    0.47
  -1   6  -8   -0.59    0.86
  -1   6  -8   -0.64    0.60
   1   6   8    0.52    0.87
  -6   7   8    2.19    0.99
   5  -7  -8    0.25    0.68
  -5  -7   8    0.74    0.78
  -5  -7   8    1.80    1.01
  -5  -7   8    2.69    0.67
  -5  -7   8    0.02    0.93
   5  -7  -8    1.50    0.99
  -5   7   8    0.30    0.77
   5   7  -8    1.53    1.01
  -5   7   8    0.21    1.00
  -4  -7   8    1.18    0.64
  -4  -7   8    1.13    0.73
  -4  -7   8    1.39    0.91
   4  -7  -8    2.44    0.98
  -4  -7   8    0.57    0.91
   4  -7  -8    0.09    0.59
  -4   7   8   -0.48    1.01
   4   7  -8    1.36    0.86
  -4   7   8   -0.35    0.66
   3  -7  -8   13.57    1.50
  -3  -7   8   11.10    1.47
  -3  -7   8   12.57    1.30
  -3  -7   8   12.22    1.26
   3  -7  -8   12.12    1.21
  -3  -7   8   14.53    1.58
   3   7  -8   14.05    1.50
  -3   7   8   14.36    1.38
   2  -7  -8    0.24    0.53
  -2  -7   8    0.68    0.80
  -2  -7   8    1.66    0.65
   2  -7  -8    1.20    1.05
  -2  -7   8   -0.09    0.72
  -2  -7   8    0.32    0.61
   2   7  -8    1.60    0.74
  -2   7   8   -0.34    0.57
  -2   7   8    0.02    0.71
  -2   7   8   -0.84    0.99
   1  -7  -8    3.89    1.12
  -1  -7   8    4.16    0.83
   1  -7  -8    4.78    0.69
  -1  -7   8    2.45    0.95
  -1  -7   8    3.72    0.71
  -1  -7   8    3.97    0.87
  -1   7   8    2.07    0.62
   1   7  -8    3.39    0.77
  -1   7   8    2.31    0.79
   0  -7   8    3.96    0.99
   0  -7  -8    3.98    0.67
   0  -7   8    7.33    1.12
   0  -7   8    4.81    0.88
   0  -7  -8    4.21    1.09
   0   7  -8    6.54    0.99
   0   7   8    4.73    0.90
   0   7   8    4.50    0.65
   0   7  -8    4.90    0.80
   1  -7   8    0.93    0.63
   1  -7   8    2.71    1.15
  -1  -7  -8    0.32    0.50
   1  -7   8    0.96    1.09
   1   7   8    0.09    0.53
   1   7   8   -1.03    1.06
   1   7   8    0.69    0.87
   1   7   8    0.12    0.50
  -1   7  -8   -0.02    0.85
  -5  -8   8    0.81    1.09
  -5  -8   8   -0.37    0.79
  -5  -8   8   -0.67    0.86
   5  -8  -8    0.27    0.73
   5   8  -8    0.66    1.06
  -5   8   8   -0.18    0.75
  -5   8   8    0.13    0.94
   4  -8  -8    0.87    0.64
   4  -8  -8    0.57    1.05
  -4  -8   8    0.15    0.85
  -4  -8   8    0.96    1.02
  -4  -8   8    0.90    0.62
  -4  -8   8   -0.63    0.72
   4   8  -8    1.53    0.95
  -4   8   8   -1.13    0.95
  -4   8   8   -0.31    0.63
   3  -8  -8    3.60    1.17
  -3  -8   8    3.29    0.88
  -3  -8   8    3.19    0.77
  -3  -8   8    3.14    0.97
   3  -8  -8    2.13    0.62
   3   8  -8    4.64    0.95
  -3   8   8    0.64    1.09
  -3   8   8    1.10    0.72
   2  -8  -8    3.37    1.23
  -2  -8   8    2.97    0.88
  -2  -8   8    1.94    0.72
   2  -8  -8    1.07    0.62
  -2  -8   8    2.33    0.90
  -2  -8   8    2.80    0.72
   2   8  -8    3.30    0.86
  -2   8   8    1.86    0.68
  -1  -8   8    1.05    0.94
  -1  -8   8    2.62    0.70
  -1  -8   8    3.21    0.81
   1  -8  -8    3.23    1.26
   1  -8  -8    1.93    0.60
  -1  -8   8    1.59    0.78
  -1   8   8    1.64    0.86
   1   8  -8    3.70    0.82
  -1   8   8    2.29    0.66
   0  -8  -8   -0.32    1.18
   0  -8  -8   -0.47    0.51
   0  -8   8   -0.16    0.91
   0  -8   8    1.00    0.69
   0  -8   8    2.40    0.90
   0  -8   8   -0.52    0.58
   0   8   8   -0.69    1.11
   0   8   8    0.26    0.55
   0   8   8    0.07    0.88
   0   8   8    0.43    0.56
   0   8  -8   -0.03    0.79
   0   8  -8    1.81    0.68
   1  -8   8   -0.13    0.64
   1  -8   8    0.39    1.18
  -1   8  -8   -0.19    0.89
   1   8   8   -0.06    0.93
   1   8   8   -0.64    1.25
   1   8   8   -0.72    0.55
  -5  -9   8    1.35    0.93
  -5  -9   8    1.99    1.22
  -5  -9   8    0.70    0.86
   5  -9  -8    1.17    0.82
  -5   9   8    1.42    0.84
   5   9  -8    3.34    1.18
  -4  -9   8    2.13    0.82
   4  -9  -8    2.25    0.72
  -4  -9   8    2.01    1.20
   4  -9  -8    3.17    1.23
  -4  -9   8    0.72    0.83
  -4   9   8    3.10    0.80
   4   9  -8    2.65    1.07
  -3  -9   8    1.85    0.72
  -3  -9   8    2.11    0.77
  -3  -9   8    0.42    0.76
   3  -9  -8    0.71    0.60
   3  -9  -8    1.08    1.28
  -3  -9   8    1.61    1.06
  -3   9   8   -0.42    1.07
  -3   9   8    2.34    0.74
   3   9  -8    3.43    1.05
   2  -9  -8   -0.54    0.53
  -2  -9   8   -0.42    0.86
  -2  -9   8    0.22    0.67
   2  -9  -8    0.52    1.29
  -2  -9   8    0.72    0.63
  -2  -9   8   -0.54    0.80
   2   9  -8    0.92    0.84
  -2   9   8   -1.76    1.13
  -2   9   8   -0.79    0.61
  -1  -9   8    4.75    0.98
  -1  -9   8    2.94    0.75
  -1  -9   8    2.11    0.93
  -1  -9   8    5.13    0.86
   1  -9  -8    3.61    0.68
   1  -9  -8    5.51    1.41
   1   9  -8    4.65    0.88
   1   9  -8    2.14    0.81
  -1   9   8    2.89    0.98
  -1   9   8    3.30    0.70
   0  -9   8    7.50    1.17
   0  -9  -8    5.41    1.45
   0  -9   8    8.42    1.33
   0  -9   8    3.66    1.09
   0   9  -8    6.24    1.01
   0   9   8    5.67    1.05
   0   9   8    4.81    0.74
  -4 -10   8    0.43    0.93
  -4 -10   8    1.04    1.23
   4 -10  -8   -0.15    1.35
  -4 -10   8    1.16    0.77
   4  10  -8    2.45    1.16
  -4  10   8    0.87    0.74
  -3 -10   8    1.93    1.17
  -3 -10   8    2.08    0.85
   3 -10  -8   -0.82    1.36
  -3  10   8    1.26    0.75
   3  10  -8    2.98    1.08
  -3  10   8   -0.93    1.20
  -2 -10   8    0.39    0.83
  -2 -10   8    2.57    1.09
   2 -10  -8    2.37    1.43
  -2 -10   8    2.29    0.78
  -2  10   8    2.67    0.75
   2  10  -8    5.46    1.08
  -2  10   8   -0.34    1.27
   1 -10  -8    4.39    1.51
  -1 -10   8    3.36    0.94
  -1 -10   8    4.57    1.07
  -1 -10   8    3.32    0.80
  -1  10   8    3.61    0.74
   1  10  -8    2.74    0.81
  -1  10   8    3.51    1.07
   0 -10   8    2.10    0.75
   0  10   8   -2.02    1.38
   0  10   8    0.80    0.62
   0  10  -8    1.19    0.87
   0  10   8    1.78    1.01
  -3 -11   8    0.78    0.92
  -3 -11   8    1.31    1.31
   3  11  -8    3.61    1.20
   2 -11  -8   12.09    2.33
  -2 -11   8   12.39    2.08
  -2 -11   8   10.63    1.46
  -2 -11   8    7.41    1.34
  -2  11   8    8.95    1.27
   5   0  -9    2.06    0.73
   5   0  -9    2.39    0.89
  -5   0   9    1.29    1.23
  -5   0   9    1.83    0.82
  -5   0   9    2.23    0.58
  -5   0   9    2.27    0.93
   4   0  -9    7.55    1.16
  -4   0   9    4.23    0.74
  -4   0   9    8.02    1.56
  -4   0   9    4.99    0.81
  -4   0   9    6.40    1.27
   4   0  -9    6.52    1.16
  -3   0   9   11.78    1.36
  -3   0   9   12.71    1.30
  -3   0   9   12.71    1.22
   3   0  -9   12.50    1.29
  -3   0   9   14.17    1.62
  -2   0   9    0.30    0.56
   2   0  -9    0.52    0.59
  -2   0   9    0.47    0.61
  -2   0   9    0.27    0.67
  -2   0   9   -0.67    1.06
  -1   0   9    3.18    0.83
  -1   0   9    2.40    1.17
  -1   0   9    3.37    0.70
  -1   0   9    4.95    0.97
   1   0  -9    3.44    0.75
   0   0   9    1.83    1.05
   0   0  -9    1.55    0.66
   0   0   9    2.23    0.71
   0   0   9    2.24    0.61
   1   0   9    1.08    1.20
   1   0   9    0.25    0.52
  -5  -1   9    2.03    1.17
   5  -1  -9    0.66    0.74
  -5  -1   9    1.78    0.99
   5  -1  -9    1.54    0.85
  -5  -1   9    0.25    0.79
  -5  -1   9    0.25    0.55
   5   1  -9    1.62    0.70
   5   1  -9    2.32    0.94
  -5   1   9    0.39    0.79
  -5   1   9    1.57    0.56
  -5   1   9    0.89    0.86
  -5   1   9    1.26    1.25
   4  -1  -9    4.40    0.86
  -4  -1   9    4.99    0.79
   4  -1  -9    4.01    0.79
  -4  -1   9    5.71    1.25
  -4  -1   9    4.44    0.69
  -4  -1   9    5.77    0.97
  -4   1   9    4.00    0.80
   4   1  -9    6.08    0.91
  -4   1   9    4.35    0.71
  -4   1   9    2.25    1.15
  -4   1   9    6.12    1.19
   3  -1  -9    2.08    0.75
  -3  -1   9    1.75    0.67
  -3  -1   9    1.31    0.70
  -3  -1   9    0.21    0.59
  -3  -1   9    1.16    1.07
   3  -1  -9    1.21    0.66
  -3   1   9    0.37    0.63
  -3   1   9    1.13    1.26
   3   1  -9    0.66    0.65
  -3   1   9    1.20    0.61
  -3   1   9    1.03    0.63
  -2  -1   9    1.86    0.67
  -2  -1   9    0.30    1.05
  -2  -1   9    2.31    0.73
  -2  -1   9    1.90    0.62
   2  -1  -9    1.10    0.61
  -2   1   9    2.06    1.12
  -2   1   9    2.04    0.69
  -2   1   9    1.60    0.62
  -2   1   9    1.40    0.76
   2   1  -9    2.11    0.70
  -1  -1   9    1.59    1.17
  -1  -1   9    2.76    0.89
   1  -1  -9    3.17    0.69
  -1  -1   9    2.42    0.63
  -1  -1   9    2.72    0.76
  -1   1   9    3.30    0.78
  -1   1   9    3.98    0.93
   1   1  -9    4.17    0.75
  -1   1   9    2.42    1.16
  -1   1   9    2.12    0.61
   0  -1   9    2.58    1.04
   0  -1   9    1.43    0.56
   0  -1   9    1.38    1.19
   0  -1   9    1.49    0.75
   0  -1  -9    1.98    0.67
   0   1   9    0.56    0.53
   0   1  -9    2.26    0.70
   0   1   9    2.77    1.08
   0   1   9    0.63    1.22
   0   1   9    1.80    0.75
   1  -1   9    1.73    1.27
   1  -1   9    0.54    0.51
   1   1   9    1.23    0.51
   1   1   9    3.85    1.26
   5  -2  -9    0.85    0.84
   5  -2  -9    1.28    0.75
  -5  -2   9    2.18    1.22
  -5  -2   9    1.60    0.99
  -5  -2   9    0.99    0.82
  -5   2   9   -0.30    0.82
  -5   2   9    0.24    0.54
  -5   2   9   -0.35    1.12
  -5   2   9   -0.47    0.77
   5   2  -9    1.49    0.95
  -4  -2   9    7.33    1.37
   4  -2  -9    6.71    0.89
  -4  -2   9    7.37    1.28
  -4  -2   9    5.55    0.85
  -4  -2   9    7.79    0.99
   4  -2  -9    5.58    1.01
  -4   2   9    4.96    0.78
  -4   2   9    7.58    1.23
   4   2  -9    7.19    0.98
  -4   2   9    6.68    1.17
  -3  -2   9    4.66    0.76
  -3  -2   9    4.02    0.71
   3  -2  -9    4.19    0.89
  -3  -2   9    3.71    0.82
  -3  -2   9    4.36    1.09
   3  -2  -9    3.27    0.74
   3   2  -9    4.08    0.82
  -3   2   9    3.61    0.78
  -3   2   9    1.92    1.24
  -3   2   9    3.39    0.68
  -3   2   9    2.76    0.70
  -2  -2   9    0.32    1.04
   2  -2  -9    1.37    0.83
  -2  -2   9    1.83    0.72
  -2  -2   9    0.59    0.56
   2  -2  -9    0.96    0.61
  -2  -2   9    0.54    0.65
  -2   2   9    1.04    0.74
   2   2  -9    1.97    0.68
  -2   2   9    1.45    0.58
  -2   2   9    0.28    0.62
  -2   2   9   -0.36    1.22
  -1  -2   9    5.73    0.97
   1  -2  -9    6.13    1.08
  -1  -2   9    6.93    1.18
  -1  -2   9    8.08    1.38
  -1  -2   9    5.22    1.18
  -1   2   9    8.11    1.19
  -1   2   9    7.59    1.44
  -1   2   9    6.57    1.02
  -1   2   9    8.18    1.02
   1   2  -9    7.06    1.12
   0  -2   9    6.73    1.19
   0  -2   9    2.45    1.22
   0  -2   9    5.04    0.93
   0  -2   9    3.04    0.62
   0   2   9    2.71    1.32
   0   2   9    3.92    0.65
   0   2   9    4.87    1.06
   1  -2   9    5.99    1.33
   1   2   9    4.59    1.24
  -5  -3   9    3.79    1.11
   5  -3  -9    1.42    0.77
  -5  -3   9    0.94    1.09
   5  -3  -9    1.63    0.86
  -5  -3   9    2.36    0.84
  -5   3   9    1.37    0.61
   5   3  -9    2.92    1.02
  -5   3   9    0.09    1.04
  -5   3   9    0.57    0.79
   4  -3  -9    6.05    0.87
  -4  -3   9    6.32    1.00
  -4  -3   9    6.80    0.89
  -4  -3   9    4.08    1.21
   4  -3  -9    7.64    1.10
  -4  -3   9    9.47    1.53
  -4   3   9    6.72    1.18
  -4   3   9    5.99    0.84
   4   3  -9   10.07    1.42
  -4   3   9    6.43    1.18
  -3  -3   9    3.27    0.68
   3  -3  -9    1.56    0.91
  -3  -3   9    2.34    0.97
  -3  -3   9    2.10    0.79
   3  -3  -9    1.26    0.66
  -3  -3   9    2.37    0.67
  -3   3   9    2.81    0.72
  -3   3   9    1.08    0.63
  -3   3   9    2.83    0.70
  -3   3   9    0.86    1.21
   3   3  -9    2.67    0.77
   2  -3  -9   14.47    1.64
   2  -3  -9   13.05    1.23
  -2  -3   9   15.98    1.29
  -2  -3   9   14.97    1.43
  -2  -3   9   17.27    1.49
  -2  -3   9   14.82    1.72
  -2   3   9   12.41    1.32
  -2   3   9   13.59    1.28
   2   3  -9   15.31    1.38
  -2   3   9   15.44    1.48
  -1  -3   9    1.54    0.58
   1  -3  -9    1.56    0.64
  -1  -3   9    2.94    0.77
  -1  -3   9    1.34    1.08
  -1  -3   9    2.65    0.86
  -1   3   9    2.40    0.89
  -1   3   9    1.09    0.56
  -1   3   9    1.14    1.32
  -1   3   9    2.23    0.72
   1   3  -9    3.14    0.71
   0  -3   9   -0.55    1.13
   0  -3   9    1.62    1.11
   0   3   9   -1.07    0.49
   0   3   9    0.85    1.06
   0   3   9   -0.86    1.37
  -5  -4   9    3.11    1.09
  -5  -4   9    1.42    1.14
  -5  -4   9    2.25    0.87
   5  -4  -9    3.53    0.87
   5   4  -9    3.82    1.09
  -5   4   9    3.84    0.76
  -5   4   9    2.46    0.82
  -5   4   9    2.36    1.15
  -4  -4   9    2.38    0.93
   4  -4  -9    1.65    0.87
  -4  -4   9   -1.44    0.98
   4  -4  -9    0.74    0.67
  -4  -4   9    1.09    0.73
  -4   4   9    0.65    1.15
   4   4  -9    2.47    0.91
  -4   4   9    0.14    0.64
  -4   4   9    0.93    0.66
   3  -4  -9    6.97    1.11
   3  -4  -9    8.08    1.39
  -3  -4   9    8.50    1.17
  -3  -4   9    9.98    1.40
  -3  -4   9    9.82    1.52
  -3   4   9    9.28    1.29
  -3   4   9    7.36    0.93
  -3   4   9    7.90    1.16
   3   4  -9   11.85    1.36
  -2  -4   9   11.71    1.16
  -2  -4   9   11.64    1.34
   2  -4  -9    9.22    1.54
  -2  -4   9   10.17    1.59
   2  -4  -9    7.13    1.09
  -2  -4   9   11.20    1.31
  -2   4   9   10.36    1.40
   2   4  -9   14.05    1.40
  -2   4   9   10.28    1.23
  -2   4   9    8.34    1.10
  -1  -4   9    6.23    1.10
  -1  -4   9    3.59    0.70
  -1  -4   9    8.03    1.37
  -1  -4   9    3.59    1.15
   1  -4  -9    5.23    0.78
  -1   4   9    4.67    0.80
  -1   4   9    5.53    1.04
  -1   4   9    4.29    0.71
   1   4  -9    5.39    0.84
   0  -4   9    3.88    1.18
   0  -4   9    1.55    0.62
   0  -4   9    0.38    1.14
   0   4   9    0.64    1.38
   0   4   9    3.52    1.02
   0   4   9    1.78    0.60
  -5  -5   9   -1.64    0.84
   5  -5  -9    0.41    0.75
  -5  -5   9   -0.67    1.05
  -5  -5   9    0.72    1.15
   5   5  -9    0.82    1.11
  -5   5   9   -0.91    0.96
  -5   5   9   -0.31    0.76
  -4  -5   9    0.26    0.76
  -4  -5   9    1.70    1.02
   4  -5  -9   -0.16    0.61
  -4  -5   9   -0.63    0.90
  -4  -5   9    1.84    0.67
   4  -5  -9    0.99    0.89
  -4   5   9    0.70    1.13
   4   5  -9    1.89    0.96
  -4   5   9    0.16    0.68
  -4   5   9    0.51    0.68
  -3  -5   9    0.92    0.95
   3  -5  -9   -0.08    0.98
   3  -5  -9    0.23    0.56
  -3  -5   9    2.27    0.67
  -3  -5   9    1.25    0.85
  -3  -5   9    0.81    0.67
   3   5  -9    2.05    0.88
  -3   5   9   -0.68    1.16
  -3   5   9   -0.05    0.72
   2  -5  -9   -1.17    0.58
  -2  -5   9   -0.31    0.93
  -2  -5   9    0.95    0.77
   2  -5  -9   -1.32    1.07
  -2  -5   9   -0.49    0.67
   2   5  -9    0.57    0.72
  -2   5   9   -0.25    1.25
  -2   5   9    0.17    0.63
  -2   5   9   -0.29    0.80
  -1  -5   9   11.09    1.44
   1  -5  -9    6.90    1.28
  -1  -5   9    6.54    1.06
  -1   5   9    7.04    1.12
  -1   5   9    7.19    1.08
   1   5  -9   10.41    1.35
  -1   5   9    7.07    0.85
   0  -5   9    3.35    1.15
   0  -5   9    1.26    0.58
   0  -5   9   -0.68    1.19
   0   5   9    0.25    0.55
   0   5   9    2.03    1.09
   0   5   9   -0.80    1.39
   4  -6  -9   -0.83    0.63
   4  -6  -9    0.77    1.07
  -4  -6   9   -0.85    0.72
  -4  -6   9   -0.21    0.97
  -4  -6   9    0.11    1.02
  -4   6   9   -1.27    1.10
   4   6  -9    1.03    1.00
  -4   6   9   -1.35    0.62
  -3  -6   9    2.75    0.96
  -3  -6   9    3.85    0.79
   3  -6  -9    3.35    0.69
  -3  -6   9    6.16    1.16
   3  -6  -9    5.93    1.27
  -3  -6   9    5.16    0.81
   3   6  -9    5.40    1.06
  -3   6   9    4.83    0.81
  -3   6   9    4.88    0.97
  -2  -6   9    1.13    0.69
  -2  -6   9    3.24    0.89
   2  -6  -9    0.85    1.18
  -2  -6   9    2.82    1.02
   2  -6  -9    0.84    0.67
  -2   6   9    0.70    0.61
   2   6  -9    2.10    0.84
  -2   6   9   -0.90    1.15
  -2   6   9    1.72    0.92
  -2   6   9    1.41    0.64
  -1  -6   9    3.26    0.82
   1  -6  -9    1.11    1.16
  -1  -6   9    2.24    0.92
  -1  -6   9    1.29    0.59
  -1  -6   9   -0.53    0.96
  -1   6   9   -1.37    1.29
  -1   6   9   -0.23    0.59
  -1   6   9    1.04    1.00
   0   6   9    0.93    0.59
   0   6   9   -0.98    1.45
   0   6   9    1.49    1.09
  -4  -7   9    0.12    0.88
  -4  -7   9   -0.70    0.88
  -4  -7   9    3.00    1.22
   4   7  -9    1.62    1.21
  -4   7   9   -1.41    1.07
  -4   7   9    0.61    0.69
  -3  -7   9    0.39    0.75
  -3  -7   9    2.88    1.08
   3  -7  -9    2.18    1.32
  -3  -7   9   -1.25    0.89
  -3   7   9   -1.69    1.23
  -3   7   9    0.53    0.94
   3   7  -9    2.77    1.08
  -3   7   9   -0.10    0.67
  -2  -7   9    0.66    0.73
  -2  -7   9    0.30    0.85
  -2  -7   9    0.48    0.65
  -2  -7   9    1.04    0.88
   2  -7  -9    0.69    1.36
  -2   7   9   -0.49    1.31
  -2   7   9   -0.07    0.93
   2   7  -9    2.93    0.94
  -2   7   9   -0.71    0.60
  -1  -7   9    0.29    0.90
   1  -7  -9    1.32    1.27
  -1   7   9    0.72    0.62
  -1   7   9    0.62    1.06
  -1   7   9   -0.55    1.35
   1   7  -9    3.03    0.84
  -3  -8   9   -0.01    0.87
  -3  -8   9    0.54    0.78
   3  -8  -9    2.78    1.46
  -3  -8   9    1.85    1.21
   3   8  -9    2.83    1.13
  -3   8   9   -0.04    0.98
  -3   8   9   -1.02    1.26
  -3   8   9   -1.37    0.76
  -2  -8   9   -1.06    0.86
  -2  -8   9    0.91    1.03
   2  -8  -9    0.24    1.47
  -2  -8   9    0.93    0.70
  -2   8   9   -0.48    1.38
  -2   8   9   -0.51    1.07
   2   8  -9    2.19    1.01
  -3   0  10    0.51    0.61
  -3   0  10   -1.40    1.30
  -3   0  10    0.36    0.77
  -3  -1  10   -0.80    0.60
  -3  -1  10    0.32    0.83
  -3   1  10    0.82    0.83
   0   0   0    0.00    0.00
;
_shelx_hkl_checksum               62001
